# Supplementary material for: From Diagnosis to Satisfaction in Multiple Sclerosis: A Swiss Patient Survey Highlighting the Importance of the First Diagnostic Consultation
Source: MDPI journal article supplement (doi:10.3390/ctn6010004), 2022-01-31
Supplement: s1 [file s1]

Archive with 3 entries (3 files):
- MRK04_DescriptiveResults_20180316.pdf
- MRK04_Fragebogen_D_V1.4_Final_20170323.pdf
- Tables_Supplementary material_11_2021.pdf
