# Supplementary material for: From Diagnosis to Satisfaction in Multiple Sclerosis: A Swiss Patient Survey Highlighting the Importance of the First Diagnostic Consultation
Source: MDPI journal article supplement (doi:10.3390/ctn6010004), 2022-01-31
Supplement: s1 [file s1 › MRK04_DescriptiveResults_20180316.pdf]

**1. ANZAHL FRAGEBOGEN NACH ZENTREN, SPRACHE UND ERHEBUNGSART**  
**Alle Fälle (Datenerfassung Stand 12.03.2018)**

|                                     |                                   | Fragebogen Abgabe |        |        |       | Total |        |
|-------------------------------------|-----------------------------------|-------------------|--------|--------|-------|-------|--------|
|                                     |                                   | Papier            |        | Online |       | N     | col%   |
|                                     |                                   | N                 | row%   | N      | row%  |       |        |
| Total                               |                                   | 186               | 87.3%  | 27     | 12.7% | 213   | 100.0% |
| 1. Sind Sie weiblich oder männlich? | Weiblich                          | 140               | 90.3%  | 15     | 9.7%  | 155   | 72.8%  |
|                                     | Männlich                          | 44                | 80.0%  | 11     | 20.0% | 55    | 25.8%  |
|                                     | Keine Angabe                      | 2                 | 66.7%  | 1      | 33.3% | 3     | 1.4%   |
| Sprache:                            | Deutsch                           | 143               | 88.3%  | 19     | 11.7% | 162   | 76.1%  |
|                                     | Français                          | 43                | 84.3%  | 8      | 15.7% | 51    | 23.9%  |
| Zentrum:                            | 03 - KSSG                         | 7                 | 77.8%  | 2      | 22.2% | 9     | 4.2%   |
|                                     | 05 - LUKS                         | 52                | 94.5%  | 3      | 5.5%  | 55    | 25.8%  |
|                                     | 06 - Neurologie Löwenplatz (LU)   | 12                | 92.3%  | 1      | 7.7%  | 13    | 6.1%   |
|                                     | 09 - Neurozentrum Bellevue (ZH)   | 9                 | 69.2%  | 4      | 30.8% | 13    | 6.1%   |
|                                     | 10 - Hirslanden (ZH)              | 14                | 100.0% |        |       | 14    | 6.6%   |
|                                     | 11 - Kantonsspital Münsterlingen  | 1                 | 50.0%  | 1      | 50.0% | 2     | 0.9%   |
|                                     | 12 - Neurozentrum Bern            | 22                | 84.6%  | 4      | 15.4% | 26    | 12.2%  |
|                                     | 14 - Spitalzentrum Biel           | 17                | 94.4%  | 1      | 5.6%  | 18    | 8.5%   |
|                                     | 15 - Praxis Welter/Fritschi, Thun | 14                | 82.4%  | 3      | 17.6% | 17    | 8.0%   |
|                                     | 16 - Dr. Bock, Zofingen           | 5                 | 83.3%  | 1      | 16.7% | 6     | 2.8%   |
|                                     | 23 - Privatklinik Carouge         | 11                | 64.7%  | 6      | 35.3% | 17    | 8.0%   |
|                                     | 24 - Privatklinik Lausanne        | 15                | 93.8%  | 1      | 6.3%  | 16    | 7.5%   |
|                                     | 25 - Privatklinik Genf            | 6                 | 100.0% |        |       | 6     | 2.8%   |
|                                     | 27 - Spital Wallis                | 1                 | 100.0% |        |       | 1     | 0.5%   |
| Fragebogen brauchbar?               | ja                                | 185               | 87.3%  | 27     | 12.7% | 212   | 99.5%  |
|                                     | Fragebogen leer                   | 1                 | 100.0% |        |       | 1     | 0.5%   |

## 2.1 FRAGE 1: GESCHLECHT NACH KEY VARIABLEN I

|                                      |                                   | 1. Sind Sie weiblich oder männlich? |        |          |        |              |        | Total |        |
|--------------------------------------|-----------------------------------|-------------------------------------|--------|----------|--------|--------------|--------|-------|--------|
|                                      |                                   | Weiblich                            |        | Männlich |        | Keine Angabe |        | N     | col%   |
|                                      |                                   | N                                   | col%   | N        | col%   | N            | col%   |       |        |
| Total                                |                                   | 155                                 | 100.0% | 55       | 100.0% | 2            | 100.0% | 212   | 100.0% |
| Geschlecht:                          | Weiblich                          | 155                                 | 100.0% |          |        |              |        | 155   | 73.1%  |
|                                      | Männlich                          |                                     |        | 55       | 100.0% |              |        | 55    | 25.9%  |
|                                      | Keine Angabe                      |                                     |        |          |        | 2            | 100.0% | 2     | 0.9%   |
| Altersgruppe:                        | bis 30 Jahre                      | 30                                  | 19.4%  | 3        | 5.5%   |              |        | 33    | 15.6%  |
|                                      | 31 – 40 Jahre                     | 40                                  | 25.8%  | 16       | 29.1%  |              |        | 56    | 26.4%  |
|                                      | 41 – 45 Jahre                     | 25                                  | 16.1%  | 12       | 21.8%  |              |        | 37    | 17.5%  |
|                                      | über 45 Jahre                     | 60                                  | 38.7%  | 24       | 43.6%  |              |        | 84    | 39.6%  |
|                                      | Keine Angabe                      |                                     |        |          |        | 2            | 100.0% | 2     | 0.9%   |
|                                      |                                   |                                     |        |          |        |              |        |       |        |
| höchste Berufsausbildung:            | Obligatorische Schule/Anlehre     | 15                                  | 9.7%   | 2        | 3.6%   |              |        | 17    | 8.0%   |
|                                      | Berufslehre/ - schule             | 76                                  | 49.0%  | 22       | 40.0%  |              |        | 98    | 46.2%  |
|                                      | Höhere Fach- und Berufsausbildung | 38                                  | 24.5%  | 22       | 40.0%  |              |        | 60    | 28.3%  |
|                                      | Universität / Fachhochschule      | 26                                  | 16.8%  | 8        | 14.5%  |              |        | 34    | 16.0%  |
|                                      | Keine Angabe                      |                                     |        | 1        | 1.8%   | 2            | 100.0% | 3     | 1.4%   |
| Form der MS:                         | CIS                               | 3                                   | 1.9%   | 2        | 3.6%   |              |        | 5     | 2.4%   |
|                                      | RRMS                              | 144                                 | 92.9%  | 45       | 81.8%  | 1            | 50.0%  | 190   | 89.6%  |
|                                      | SPMS                              | 7                                   | 4.5%   | 8        | 14.5%  |              |        | 15    | 7.1%   |
|                                      | Keine Angabe                      | 1                                   | 0.6%   |          |        | 1            | 50.0%  | 2     | 0.9%   |
| Dauer seit der Diagnose:             | < 12 Monate                       | 12                                  | 7.7%   | 6        | 10.9%  |              |        | 18    | 8.5%   |
|                                      | 1 – 3 Jahre                       | 24                                  | 15.5%  | 5        | 9.1%   |              |        | 29    | 13.7%  |
|                                      | 3 – 5 Jahre                       | 19                                  | 12.3%  | 9        | 16.4%  |              |        | 28    | 13.2%  |
|                                      | 5 – 10 Jahre                      | 32                                  | 20.6%  | 12       | 21.8%  | 1            | 50.0%  | 45    | 21.2%  |
|                                      | 10 – 15 Jahre                     | 23                                  | 14.8%  | 12       | 21.8%  |              |        | 35    | 16.5%  |
|                                      | > 15 Jahre                        | 45                                  | 29.0%  | 11       | 20.0%  |              |        | 56    | 26.4%  |
|                                      | Keine Angabe                      |                                     |        |          |        | 1            | 50.0%  | 1     | 0.5%   |
| Gespräch mit Neurologe bei Diagnose: | sehr gut/gut                      | 83                                  | 53.5%  | 34       | 61.8%  | 1            | 50.0%  | 118   | 55.7%  |
|                                      | mittel                            | 19                                  | 12.3%  | 7        | 12.7%  |              |        | 26    | 12.3%  |
|                                      | schlecht/sehr schlecht            | 48                                  | 31.0%  | 14       | 25.5%  | 1            | 50.0%  | 63    | 29.7%  |
|                                      | Keine Angabe                      | 5                                   | 3.2%   |          |        |              |        | 5     | 2.4%   |

## 2.2 FRAGE 1: GESCHLECHT NACH KEY VARIABLEN II

|                                     |                    | 1. Sind Sie weiblich oder männlich? |        |          |        |              |        | Total |        |
|-------------------------------------|--------------------|-------------------------------------|--------|----------|--------|--------------|--------|-------|--------|
|                                     |                    | Weiblich                            |        | Männlich |        | Keine Angabe |        | N     | col%   |
|                                     |                    | N                                   | col%   | N        | col%   | N            | col%   |       |        |
| Total                               |                    | 155                                 | 100.0% | 55       | 100.0% | 2            | 100.0% | 212   | 100.0% |
| Zweitmeinung bei Diagnose:          | ja                 | 30                                  | 19.4%  | 11       | 20.0%  |              |        | 41    | 19.3%  |
|                                     | nein               | 116                                 | 74.8%  | 40       | 72.7%  | 2            | 100.0% | 158   | 74.5%  |
|                                     | Keine Angabe       | 9                                   | 5.8%   | 4        | 7.3%   |              |        | 13    | 6.1%   |
| Therapieentscheid bei Erstdiagnose: | Aubagio            | 3                                   | 1.9%   | 1        | 1.8%   |              |        | 4     | 1.9%   |
|                                     | Injizierbare       | 113                                 | 72.9%  | 37       | 67.3%  | 1            | 50.0%  | 151   | 71.2%  |
|                                     | Gilenya            | 15                                  | 9.7%   | 7        | 12.7%  |              |        | 22    | 10.4%  |
|                                     | Tecfidera          | 11                                  | 7.1%   | 3        | 5.5%   |              |        | 14    | 6.6%   |
|                                     | Tysabri            | 8                                   | 5.2%   | 1        | 1.8%   | 1            | 50.0%  | 10    | 4.7%   |
|                                     | Andere             | 2                                   | 1.3%   | 2        | 3.6%   |              |        | 4     | 1.9%   |
|                                     | Keine Angabe       | 3                                   | 1.9%   | 4        | 7.3%   |              |        | 7     | 3.3%   |
| Rebif bei Erstdiagnose:             | nein               | 105                                 | 67.7%  | 45       | 81.8%  | 2            | 100.0% | 152   | 71.7%  |
|                                     | ja                 | 50                                  | 32.3%  | 10       | 18.2%  |              |        | 60    | 28.3%  |
| Aktuelle Behandlung:                | Aubagio            | 5                                   | 3.2%   | 3        | 5.5%   |              |        | 8     | 3.8%   |
|                                     | Injizierbare       | 32                                  | 20.6%  | 7        | 12.7%  |              |        | 39    | 18.4%  |
|                                     | Gilenya            | 42                                  | 27.1%  | 22       | 40.0%  |              |        | 64    | 30.2%  |
|                                     | Tecfidera          | 15                                  | 9.7%   | 4        | 7.3%   | 1            | 50.0%  | 20    | 9.4%   |
|                                     | Tysabri            | 44                                  | 28.4%  | 12       | 21.8%  | 1            | 50.0%  | 57    | 26.9%  |
|                                     | Andere             | 2                                   | 1.3%   | 1        | 1.8%   |              |        | 3     | 1.4%   |
|                                     | keine Therapie     | 15                                  | 9.7%   | 4        | 7.3%   |              |        | 19    | 9.0%   |
|                                     | Keine Angabe       |                                     |        | 2        | 3.6%   |              |        | 2     | 0.9%   |
| Rebif ist aktuelle Behandlung:      | nein               | 144                                 | 92.9%  | 54       | 98.2%  | 2            | 100.0% | 200   | 94.3%  |
|                                     | ja                 | 11                                  | 7.1%   | 1        | 1.8%   |              |        | 12    | 5.7%   |
| Anzahl MS Langzeit-Therapien:       | Erste MS Therapie  | 41                                  | 26.5%  | 16       | 29.1%  | 1            | 50.0%  | 58    | 27.4%  |
|                                     | Zweite MS Therapie | 59                                  | 38.1%  | 24       | 43.6%  | 1            | 50.0%  | 84    | 39.6%  |
|                                     | Dritte oder mehr   | 38                                  | 24.5%  | 10       | 18.2%  |              |        | 48    | 22.6%  |
|                                     | Keine Angabe       | 17                                  | 11.0%  | 5        | 9.1%   |              |        | 22    | 10.4%  |
| Rückblickend gleiche Therapie:      | ja                 | 94                                  | 60.6%  | 32       | 58.2%  | 2            | 100.0% | 128   | 60.4%  |
|                                     | nein               | 43                                  | 27.7%  | 13       | 23.6%  |              |        | 56    | 26.4%  |
|                                     | Keine Angabe       | 18                                  | 11.6%  | 10       | 18.2%  |              |        | 28    | 13.2%  |

### 2.3 FRAGE 2: ALTERSGRUPPEN NACH KEY VARIABLEN I

|                                         |                                   | Altersgruppe: |        |               |        |               |        |               |        |              |        | Total |        |
|-----------------------------------------|-----------------------------------|---------------|--------|---------------|--------|---------------|--------|---------------|--------|--------------|--------|-------|--------|
|                                         |                                   | bis 30 Jahre  |        | 31 – 40 Jahre |        | 41 – 45 Jahre |        | über 45 Jahre |        | Keine Angabe |        | N     | col%   |
|                                         |                                   | N             | col%   | N             | col%   | N             | col%   | N             | col%   | N            | col%   |       |        |
| Total                                   |                                   | 33            | 100.0% | 56            | 100.0% | 37            | 100.0% | 84            | 100.0% | 2            | 100.0% | 212   | 100.0% |
| Geschlecht:                             | Weiblich                          | 30            | 90.9%  | 40            | 71.4%  | 25            | 67.6%  | 60            | 71.4%  |              |        | 155   | 73.1%  |
|                                         | Männlich                          | 3             | 9.1%   | 16            | 28.6%  | 12            | 32.4%  | 24            | 28.6%  |              |        | 55    | 25.9%  |
|                                         | Keine Angabe                      |               |        |               |        |               |        |               |        | 2            | 100.0% | 2     | 0.9%   |
|                                         |                                   |               |        |               |        |               |        |               |        |              |        |       |        |
| 2. Zu welcher Altersgruppe gehören Sie? | unter 20 Jahre alt                | 2             | 6.1%   |               |        |               |        |               |        |              |        | 2     | 0.9%   |
|                                         | 20 - 30 Jahre alt                 | 31            | 93.9%  |               |        |               |        |               |        |              |        | 31    | 14.6%  |
|                                         | 31 – 40 Jahre alt                 |               |        | 56            | 100.0% |               |        |               |        |              |        | 56    | 26.4%  |
|                                         | 41 – 45 Jahre alt                 |               |        |               |        | 37            | 100.0% |               |        |              |        | 37    | 17.5%  |
|                                         | über 45 Jahre alt                 |               |        |               |        |               |        | 84            | 100.0% |              |        | 84    | 39.6%  |
|                                         | Keine Angabe                      |               |        |               |        |               |        |               |        | 2            | 100.0% | 2     | 0.9%   |
| höchste Berufsausbildung:               | Obligatorische Schule/Anlehre     | 2             | 6.1%   | 1             | 1.8%   | 4             | 10.8%  | 10            | 11.9%  |              |        | 17    | 8.0%   |
|                                         | Berufslehre/ - schule             | 18            | 54.5%  | 29            | 51.8%  | 14            | 37.8%  | 37            | 44.0%  |              |        | 98    | 46.2%  |
|                                         | Höhere Fach- und Berufsausbildung | 6             | 18.2%  | 13            | 23.2%  | 15            | 40.5%  | 26            | 31.0%  |              |        | 60    | 28.3%  |
|                                         | Universität / Fachhochschule      | 6             | 18.2%  | 13            | 23.2%  | 4             | 10.8%  | 11            | 13.1%  |              |        | 34    | 16.0%  |
|                                         | Keine Angabe                      | 1             | 3.0%   |               |        |               |        |               |        | 2            | 100.0% | 3     | 1.4%   |
| Form der MS:                            | CIS                               | 2             | 6.1%   | 1             | 1.8%   |               |        | 2             | 2.4%   |              |        | 5     | 2.4%   |
|                                         | RRMS                              | 31            | 93.9%  | 54            | 96.4%  | 34            | 91.9%  | 70            | 83.3%  | 1            | 50.0%  | 190   | 89.6%  |
|                                         | SPMS                              |               |        | 1             | 1.8%   | 2             | 5.4%   | 12            | 14.3%  |              |        | 15    | 7.1%   |
|                                         | Keine Angabe                      |               |        |               |        | 1             | 2.7%   |               |        | 1            | 50.0%  | 2     | 0.9%   |
| Dauer seit der Diagnose:                | < 12 Monate                       | 7             | 21.2%  | 6             | 10.7%  | 2             | 5.4%   | 3             | 3.6%   |              |        | 18    | 8.5%   |
|                                         | 1 – 3 Jahre                       | 13            | 39.4%  | 11            | 19.6%  | 1             | 2.7%   | 4             | 4.8%   |              |        | 29    | 13.7%  |
|                                         | 3 – 5 Jahre                       | 7             | 21.2%  | 9             | 16.1%  | 4             | 10.8%  | 8             | 9.5%   |              |        | 28    | 13.2%  |
|                                         | 5 – 10 Jahre                      | 6             | 18.2%  | 13            | 23.2%  | 11            | 29.7%  | 14            | 16.7%  | 1            | 50.0%  | 45    | 21.2%  |
|                                         | 10 – 15 Jahre                     |               |        | 10            | 17.9%  | 10            | 27.0%  | 15            | 17.9%  |              |        | 35    | 16.5%  |
|                                         | > 15 Jahre                        |               |        | 7             | 12.5%  | 9             | 24.3%  | 40            | 47.6%  |              |        | 56    | 26.4%  |
|                                         | Keine Angabe                      |               |        |               |        |               |        |               |        | 1            | 50.0%  | 1     | 0.5%   |
| Gespräch mit Neurologe bei Diagnose:    | sehr gut/gut                      | 20            | 60.6%  | 35            | 62.5%  | 18            | 48.6%  | 44            | 52.4%  | 1            | 50.0%  | 118   | 55.7%  |
|                                         | mittel                            | 5             | 15.2%  | 4             | 7.1%   | 4             | 10.8%  | 13            | 15.5%  |              |        | 26    | 12.3%  |
|                                         | schlecht/sehr schlecht            | 8             | 24.2%  | 16            | 28.6%  | 12            | 32.4%  | 26            | 31.0%  | 1            | 50.0%  | 63    | 29.7%  |
|                                         | Keine Angabe                      |               |        | 1             | 1.8%   | 3             | 8.1%   | 1             | 1.2%   |              |        | 5     | 2.4%   |

## 2.4 FRAGE 2: ALTERSGRUPPEN NACH KEY VARIABLEN II

|                                        |                    | Altersgruppe: |        |               |        |               |        |               |        |              | Total  |     |        |
|----------------------------------------|--------------------|---------------|--------|---------------|--------|---------------|--------|---------------|--------|--------------|--------|-----|--------|
|                                        |                    | bis 30 Jahre  |        | 31 – 40 Jahre |        | 41 – 45 Jahre |        | über 45 Jahre |        | Keine Angabe |        |     |        |
|                                        |                    | N             | col%   | N             | col%   | N             | col%   | N             | col%   | N            | col%   | N   | col%   |
| Total                                  |                    | 33            | 100.0% | 56            | 100.0% | 37            | 100.0% | 84            | 100.0% | 2            | 100.0% | 212 | 100.0% |
| Zweitmeinung bei<br>Diagnose:          | ja                 | 9             | 27.3%  | 6             | 10.7%  | 4             | 10.8%  | 22            | 26.2%  |              |        | 41  | 19.3%  |
|                                        | nein               | 23            | 69.7%  | 44            | 78.6%  | 31            | 83.8%  | 58            | 69.0%  | 2            | 100.0% | 158 | 74.5%  |
|                                        | Keine Angabe       | 1             | 3.0%   | 6             | 10.7%  | 2             | 5.4%   | 4             | 4.8%   |              |        | 13  | 6.1%   |
|                                        |                    |               |        |               |        |               |        |               |        |              |        |     |        |
| Therapieentscheid bei<br>Erstdiagnose: | Aubagio            |               |        |               |        | 1             | 2.7%   | 3             | 3.6%   |              |        | 4   | 1.9%   |
|                                        | Injizierbare       | 18            | 54.5%  | 35            | 62.5%  | 26            | 70.3%  | 71            | 84.5%  | 1            | 50.0%  | 151 | 71.2%  |
|                                        | Gilenya            | 6             | 18.2%  | 10            | 17.9%  | 4             | 10.8%  | 2             | 2.4%   |              |        | 22  | 10.4%  |
|                                        | Tecfidera          | 7             | 21.2%  | 4             | 7.1%   | 3             | 8.1%   |               |        |              |        | 14  | 6.6%   |
|                                        | Tysabri            | 1             | 3.0%   | 3             | 5.4%   | 2             | 5.4%   | 3             | 3.6%   | 1            | 50.0%  | 10  | 4.7%   |
|                                        | Andere             | 1             | 3.0%   | 1             | 1.8%   |               |        | 2             | 2.4%   |              |        | 4   | 1.9%   |
|                                        | Keine Angabe       |               |        | 3             | 5.4%   | 1             | 2.7%   | 3             | 3.6%   |              |        | 7   | 3.3%   |
|                                        |                    |               |        |               |        |               |        |               |        |              |        |     |        |
| Rebif bei<br>Erstdiagnose:             | nein               | 25            | 75.8%  | 45            | 80.4%  | 25            | 67.6%  | 55            | 65.5%  | 2            | 100.0% | 152 | 71.7%  |
|                                        | ja                 | 8             | 24.2%  | 11            | 19.6%  | 12            | 32.4%  | 29            | 34.5%  |              |        | 60  | 28.3%  |
| Aktuelle Behandlung:                   | Aubagio            |               |        | 1             | 1.8%   | 3             | 8.1%   | 4             | 4.8%   |              |        | 8   | 3.8%   |
|                                        | Injizierbare       | 5             | 15.2%  | 7             | 12.5%  | 2             | 5.4%   | 25            | 29.8%  |              |        | 39  | 18.4%  |
|                                        | Gilenya            | 13            | 39.4%  | 14            | 25.0%  | 16            | 43.2%  | 21            | 25.0%  |              |        | 64  | 30.2%  |
|                                        | Tecfidera          | 5             | 15.2%  | 5             | 8.9%   | 2             | 5.4%   | 7             | 8.3%   | 1            | 50.0%  | 20  | 9.4%   |
|                                        | Tysabri            | 8             | 24.2%  | 22            | 39.3%  | 11            | 29.7%  | 15            | 17.9%  | 1            | 50.0%  | 57  | 26.9%  |
|                                        | Andere             |               |        | 1             | 1.8%   | 1             | 2.7%   | 1             | 1.2%   |              |        | 3   | 1.4%   |
|                                        | keine Therapie     | 2             | 6.1%   | 6             | 10.7%  | 2             | 5.4%   | 9             | 10.7%  |              |        | 19  | 9.0%   |
|                                        | Keine Angabe       |               |        |               |        |               |        | 2             | 2.4%   |              |        | 2   | 0.9%   |
| Rebif ist aktuelle<br>Behandlung:      | nein               | 32            | 97.0%  | 55            | 98.2%  | 37            | 100.0% | 74            | 88.1%  | 2            | 100.0% | 200 | 94.3%  |
|                                        | ja                 | 1             | 3.0%   | 1             | 1.8%   |               |        | 10            | 11.9%  |              |        | 12  | 5.7%   |
| Anzahl MS Langzeit-<br>Therapien:      | Erste MS Therapie  | 14            | 42.4%  | 13            | 23.2%  | 6             | 16.2%  | 24            | 28.6%  | 1            | 50.0%  | 58  | 27.4%  |
|                                        | Zweite MS Therapie | 12            | 36.4%  | 23            | 41.1%  | 17            | 45.9%  | 31            | 36.9%  | 1            | 50.0%  | 84  | 39.6%  |
|                                        | Dritte oder mehr   | 5             | 15.2%  | 14            | 25.0%  | 10            | 27.0%  | 19            | 22.6%  |              |        | 48  | 22.6%  |
|                                        | Keine Angabe       | 2             | 6.1%   | 6             | 10.7%  | 4             | 10.8%  | 10            | 11.9%  |              |        | 22  | 10.4%  |
| Rückblickend gleiche<br>Therapie:      | ja                 | 16            | 48.5%  | 33            | 58.9%  | 18            | 48.6%  | 59            | 70.2%  | 2            | 100.0% | 128 | 60.4%  |
|                                        | nein               | 14            | 42.4%  | 14            | 25.0%  | 13            | 35.1%  | 15            | 17.9%  |              |        | 56  | 26.4%  |
|                                        | Keine Angabe       | 3             | 9.1%   | 9             | 16.1%  | 6             | 16.2%  | 10            | 11.9%  |              |        | 28  | 13.2%  |

## 2.5 FRAGE 3: HÖCHSTE BERUFSAUSBILDUNG NACH KEY VARIABLEN I

|                                               |                                                         | höchste Berufsausbildung:     |        |                       |        |                                   |        |                              |        |              |        | Total |        |
|-----------------------------------------------|---------------------------------------------------------|-------------------------------|--------|-----------------------|--------|-----------------------------------|--------|------------------------------|--------|--------------|--------|-------|--------|
|                                               |                                                         | Obligatorische Schule/Anlehre |        | Berufslehre/ - schule |        | Höhere Fach- und Berufsausbildung |        | Universität / Fachhochschule |        | Keine Angabe |        | N     | col%   |
|                                               |                                                         | N                             | col%   | N                     | col%   | N                                 | col%   | N                            | col%   | N            | col%   |       |        |
| Total                                         |                                                         | 17                            | 100.0% | 98                    | 100.0% | 60                                | 100.0% | 34                           | 100.0% | 3            | 100.0% | 212   | 100.0% |
| Geschlecht:                                   | Weiblich                                                | 15                            | 88.2%  | 76                    | 77.6%  | 38                                | 63.3%  | 26                           | 76.5%  |              |        | 155   | 73.1%  |
|                                               | Männlich                                                | 2                             | 11.8%  | 22                    | 22.4%  | 22                                | 36.7%  | 8                            | 23.5%  | 1            | 33.3%  | 55    | 25.9%  |
|                                               | Keine Angabe                                            |                               |        |                       |        |                                   |        |                              |        | 2            | 66.7%  | 2     | 0.9%   |
|                                               |                                                         |                               |        |                       |        |                                   |        |                              |        |              |        |       |        |
| Altersgruppe:                                 | bis 30 Jahre                                            | 2                             | 11.8%  | 18                    | 18.4%  | 6                                 | 10.0%  | 6                            | 17.6%  | 1            | 33.3%  | 33    | 15.6%  |
|                                               | 31 – 40 Jahre                                           | 1                             | 5.9%   | 29                    | 29.6%  | 13                                | 21.7%  | 13                           | 38.2%  |              |        | 56    | 26.4%  |
|                                               | 41 – 45 Jahre                                           | 4                             | 23.5%  | 14                    | 14.3%  | 15                                | 25.0%  | 4                            | 11.8%  |              |        | 37    | 17.5%  |
|                                               | über 45 Jahre                                           | 10                            | 58.8%  | 37                    | 37.8%  | 26                                | 43.3%  | 11                           | 32.4%  |              |        | 84    | 39.6%  |
|                                               | Keine Angabe                                            |                               |        |                       |        |                                   |        |                              |        | 2            | 66.7%  | 2     | 0.9%   |
|                                               |                                                         |                               |        |                       |        |                                   |        |                              |        |              |        |       |        |
| 3. Welches ist Ihre höchste Berufsausbildung? | weniger als 7 Jahre Schule                              | 1                             | 5.9%   |                       |        |                                   |        |                              |        |              |        | 1     | 0.5%   |
|                                               | Obligatorische Schule                                   | 8                             | 47.1%  |                       |        |                                   |        |                              |        |              |        | 8     | 3.8%   |
|                                               | Anlehre                                                 | 8                             | 47.1%  |                       |        |                                   |        |                              |        |              |        | 8     | 3.8%   |
|                                               | Berufslehre/ - schule                                   |                               |        | 98                    | 100.0% |                                   |        |                              |        |              |        | 98    | 46.2%  |
|                                               | Maturitätsschule / Berufsmaturität / Diplommittelschule |                               |        |                       |        | 13                                | 21.7%  |                              |        |              |        | 13    | 6.1%   |
|                                               | Höhere Fach- und Berufsausbildung                       |                               |        |                       |        | 47                                | 78.3%  |                              |        |              |        | 47    | 22.2%  |
|                                               | Universität / Fachhochschule                            |                               |        |                       |        |                                   |        | 34                           | 100.0% |              |        | 34    | 16.0%  |
|                                               | Keine Angabe                                            |                               |        |                       |        |                                   |        |                              |        | 3            | 100.0% | 3     | 1.4%   |
| Form der MS:                                  | CIS                                                     |                               |        | 2                     | 2.0%   | 2                                 | 3.3%   | 1                            | 2.9%   |              |        | 5     | 2.4%   |
|                                               | RRMS                                                    | 16                            | 94.1%  | 87                    | 88.8%  | 53                                | 88.3%  | 32                           | 94.1%  | 2            | 66.7%  | 190   | 89.6%  |
|                                               | SPMS                                                    |                               |        | 9                     | 9.2%   | 5                                 | 8.3%   | 1                            | 2.9%   |              |        | 15    | 7.1%   |
|                                               | Keine Angabe                                            | 1                             | 5.9%   |                       |        |                                   |        |                              |        | 1            | 33.3%  | 2     | 0.9%   |
| Dauer seit der Diagnose:                      | < 12 Monate                                             |                               |        | 5                     | 5.1%   | 5                                 | 8.3%   | 8                            | 23.5%  |              |        | 18    | 8.5%   |
|                                               | 1 – 3 Jahre                                             | 2                             | 11.8%  | 13                    | 13.3%  | 8                                 | 13.3%  | 5                            | 14.7%  | 1            | 33.3%  | 29    | 13.7%  |
|                                               | 3 – 5 Jahre                                             | 1                             | 5.9%   | 15                    | 15.3%  | 5                                 | 8.3%   | 7                            | 20.6%  |              |        | 28    | 13.2%  |
|                                               | 5 – 10 Jahre                                            | 5                             | 29.4%  | 18                    | 18.4%  | 13                                | 21.7%  | 8                            | 23.5%  | 1            | 33.3%  | 45    | 21.2%  |
|                                               | 10 – 15 Jahre                                           | 5                             | 29.4%  | 16                    | 16.3%  | 11                                | 18.3%  | 3                            | 8.8%   |              |        | 35    | 16.5%  |
|                                               | > 15 Jahre                                              | 4                             | 23.5%  | 31                    | 31.6%  | 18                                | 30.0%  | 3                            | 8.8%   |              |        | 56    | 26.4%  |
|                                               | Keine Angabe                                            |                               |        |                       |        |                                   |        |                              |        | 1            | 33.3%  | 1     | 0.5%   |
| Gespräch mit Neurologe bei Diagnose:          | sehr gut/gut                                            | 11                            | 64.7%  | 53                    | 54.1%  | 31                                | 51.7%  | 21                           | 61.8%  | 2            | 66.7%  | 118   | 55.7%  |
|                                               | mittel                                                  | 2                             | 11.8%  | 10                    | 10.2%  | 9                                 | 15.0%  | 5                            | 14.7%  |              |        | 26    | 12.3%  |
|                                               | schlecht/sehr schlecht                                  | 2                             | 11.8%  | 34                    | 34.7%  | 19                                | 31.7%  | 7                            | 20.6%  | 1            | 33.3%  | 63    | 29.7%  |
|                                               | Keine Angabe                                            | 2                             | 11.8%  | 1                     | 1.0%   | 1                                 | 1.7%   | 1                            | 2.9%   |              |        | 5     | 2.4%   |

## 2.6 FRAGE 3: HÖCHSTE BERUFSAUSBILDUNG NACH KEY VARIABLEN II

|                                     |                    | höchste Berufsausbildung:     |        |                       |        |                                   |        |                              |        |              |        | Total |        |
|-------------------------------------|--------------------|-------------------------------|--------|-----------------------|--------|-----------------------------------|--------|------------------------------|--------|--------------|--------|-------|--------|
|                                     |                    | Obligatorische Schule/Anlehre |        | Berufslehre/ - schule |        | Höhere Fach- und Berufsausbildung |        | Universität / Fachhochschule |        | Keine Angabe |        | N     | col%   |
|                                     |                    | N                             | col%   | N                     | col%   | N                                 | col%   | N                            | col%   | N            | col%   |       |        |
| Total                               |                    | 17                            | 100.0% | 98                    | 100.0% | 60                                | 100.0% | 34                           | 100.0% | 3            | 100.0% | 212   | 100.0% |
| Zweitmeinung bei Diagnose:          | ja                 | 3                             | 17.6%  | 15                    | 15.3%  | 13                                | 21.7%  | 9                            | 26.5%  | 1            | 33.3%  | 41    | 19.3%  |
|                                     | nein               | 14                            | 82.4%  | 74                    | 75.5%  | 44                                | 73.3%  | 24                           | 70.6%  | 2            | 66.7%  | 158   | 74.5%  |
|                                     | Keine Angabe       |                               |        | 9                     | 9.2%   | 3                                 | 5.0%   | 1                            | 2.9%   |              |        | 13    | 6.1%   |
| Therapieentscheid bei Erstdiagnose: | Aubagio            | 2                             | 11.8%  | 2                     | 2.0%   |                                   |        |                              |        |              |        | 4     | 1.9%   |
|                                     | Injizierbare       | 11                            | 64.7%  | 74                    | 75.5%  | 46                                | 76.7%  | 18                           | 52.9%  | 2            | 66.7%  | 151   | 71.2%  |
|                                     | Gilenya            | 2                             | 11.8%  | 8                     | 8.2%   | 6                                 | 10.0%  | 6                            | 17.6%  |              |        | 22    | 10.4%  |
|                                     | Tecfidera          |                               |        | 6                     | 6.1%   | 3                                 | 5.0%   | 5                            | 14.7%  |              |        | 14    | 6.6%   |
|                                     | Tysabri            | 2                             | 11.8%  | 4                     | 4.1%   |                                   |        | 3                            | 8.8%   | 1            | 33.3%  | 10    | 4.7%   |
|                                     | Andere             |                               |        | 1                     | 1.0%   | 2                                 | 3.3%   | 1                            | 2.9%   |              |        | 4     | 1.9%   |
|                                     | Keine Angabe       |                               |        | 3                     | 3.1%   | 3                                 | 5.0%   | 1                            | 2.9%   |              |        | 7     | 3.3%   |
| Rebif bei Erstdiagnose:             | nein               | 12                            | 70.6%  | 66                    | 67.3%  | 47                                | 78.3%  | 24                           | 70.6%  | 3            | 100.0% | 152   | 71.7%  |
|                                     | ja                 | 5                             | 29.4%  | 32                    | 32.7%  | 13                                | 21.7%  | 10                           | 29.4%  |              |        | 60    | 28.3%  |
| Aktuelle Behandlung:                | Aubagio            | 2                             | 11.8%  | 3                     | 3.1%   | 2                                 | 3.3%   | 1                            | 2.9%   |              |        | 8     | 3.8%   |
|                                     | Injizierbare       | 1                             | 5.9%   | 16                    | 16.3%  | 15                                | 25.0%  | 7                            | 20.6%  |              |        | 39    | 18.4%  |
|                                     | Gilenya            | 6                             | 35.3%  | 30                    | 30.6%  | 20                                | 33.3%  | 8                            | 23.5%  |              |        | 64    | 30.2%  |
|                                     | Tecfidera          | 3                             | 17.6%  | 6                     | 6.1%   | 5                                 | 8.3%   | 4                            | 11.8%  | 2            | 66.7%  | 20    | 9.4%   |
|                                     | Tysabri            | 5                             | 29.4%  | 28                    | 28.6%  | 13                                | 21.7%  | 10                           | 29.4%  | 1            | 33.3%  | 57    | 26.9%  |
|                                     | Andere             |                               |        | 2                     | 2.0%   | 1                                 | 1.7%   |                              |        |              |        | 3     | 1.4%   |
|                                     | keine Therapie     |                               |        | 12                    | 12.2%  | 3                                 | 5.0%   | 4                            | 11.8%  |              |        | 19    | 9.0%   |
|                                     | Keine Angabe       |                               |        | 1                     | 1.0%   | 1                                 | 1.7%   |                              |        |              |        | 2     | 0.9%   |
| Rebif ist aktuelle Behandlung:      | nein               | 16                            | 94.1%  | 93                    | 94.9%  | 56                                | 93.3%  | 32                           | 94.1%  | 3            | 100.0% | 200   | 94.3%  |
|                                     | ja                 | 1                             | 5.9%   | 5                     | 5.1%   | 4                                 | 6.7%   | 2                            | 5.9%   |              |        | 12    | 5.7%   |
| Anzahl MS Langzeit-Therapien:       | Erste MS Therapie  | 4                             | 23.5%  | 21                    | 21.4%  | 21                                | 35.0%  | 11                           | 32.4%  | 1            | 33.3%  | 58    | 27.4%  |
|                                     | Zweite MS Therapie | 4                             | 23.5%  | 37                    | 37.8%  | 27                                | 45.0%  | 14                           | 41.2%  | 2            | 66.7%  | 84    | 39.6%  |
|                                     | Dritte oder mehr   | 9                             | 52.9%  | 26                    | 26.5%  | 9                                 | 15.0%  | 4                            | 11.8%  |              |        | 48    | 22.6%  |
|                                     | Keine Angabe       |                               |        | 14                    | 14.3%  | 3                                 | 5.0%   | 5                            | 14.7%  |              |        | 22    | 10.4%  |
| Rückblickend gleiche Therapie:      | ja                 | 12                            | 70.6%  | 50                    | 51.0%  | 39                                | 65.0%  | 25                           | 73.5%  | 2            | 66.7%  | 128   | 60.4%  |
|                                     | nein               | 4                             | 23.5%  | 32                    | 32.7%  | 12                                | 20.0%  | 7                            | 20.6%  | 1            | 33.3%  | 56    | 26.4%  |
|                                     | Keine Angabe       | 1                             | 5.9%   | 16                    | 16.3%  | 9                                 | 15.0%  | 2                            | 5.9%   |              |        | 28    | 13.2%  |

## 2.7 FRAGE 4: SICHERHEITSBEDÜRFNIS NACH KEY VARIABLEN I

| 1 = sehr sicherheitsbedacht - 5 = sehr risikofreudig |                                   | 4. Einschätzung des Sicherheitsbedürfnisses |       |    |       |    |       |    |       |   |       | Total |       |
|------------------------------------------------------|-----------------------------------|---------------------------------------------|-------|----|-------|----|-------|----|-------|---|-------|-------|-------|
|                                                      |                                   | 1                                           |       | 2  |       | 3  |       | 4  |       | 5 |       | N     | col%  |
|                                                      |                                   | N                                           | col%  | N  | col%  | N  | col%  | N  | col%  | N | col%  |       |       |
| Total                                                |                                   | 40                                          | 100%  | 69 | 100%  | 68 | 100%  | 23 | 100%  | 9 | 100%  | 209   | 100%  |
| Geschlecht:                                          | Weiblich                          | 38                                          | 95.0% | 48 | 69.6% | 47 | 69.1% | 14 | 60.9% | 7 | 77.8% | 154   | 73.7% |
|                                                      | Männlich                          | 2                                           | 5.0%  | 21 | 30.4% | 20 | 29.4% | 9  | 39.1% | 2 | 22.2% | 54    | 25.8% |
|                                                      | Keine Angabe                      |                                             |       |    |       | 1  | 1.5%  |    |       |   |       | 1     | 0.5%  |
| Altersgruppe:                                        | bis 30 Jahre                      | 3                                           | 7.5%  | 13 | 18.8% | 14 | 20.6% | 2  | 8.7%  | 1 | 11.1% | 33    | 15.8% |
|                                                      | 31 – 40 Jahre                     | 14                                          | 35.0% | 19 | 27.5% | 18 | 26.5% | 3  | 13.0% | 1 | 11.1% | 55    | 26.3% |
|                                                      | 41 – 45 Jahre                     | 5                                           | 12.5% | 13 | 18.8% | 10 | 14.7% | 6  | 26.1% | 2 | 22.2% | 36    | 17.2% |
|                                                      | über 45 Jahre                     | 18                                          | 45.0% | 24 | 34.8% | 25 | 36.8% | 12 | 52.2% | 5 | 55.6% | 84    | 40.2% |
|                                                      | Keine Angabe                      |                                             |       |    |       | 1  | 1.5%  |    |       |   |       | 1     | 0.5%  |
| höchste Berufsausbildung:                            | Obligatorische Schule/Anlehre     | 3                                           | 7.5%  | 4  | 5.8%  | 5  | 7.4%  | 3  | 13.0% | 2 | 22.2% | 17    | 8.1%  |
|                                                      | Berufslehre/ - schule             | 21                                          | 52.5% | 29 | 42.0% | 36 | 52.9% | 9  | 39.1% | 2 | 22.2% | 97    | 46.4% |
|                                                      | Höhere Fach- und Berufsausbildung | 9                                           | 22.5% | 23 | 33.3% | 15 | 22.1% | 8  | 34.8% | 4 | 44.4% | 59    | 28.2% |
|                                                      | Universität / Fachhochschule      | 7                                           | 17.5% | 13 | 18.8% | 10 | 14.7% | 3  | 13.0% | 1 | 11.1% | 34    | 16.3% |
|                                                      | Keine Angabe                      |                                             |       |    |       | 2  | 2.9%  |    |       |   |       | 2     | 1.0%  |
| Form der MS:                                         | CIS                               | 1                                           | 2.5%  | 3  | 4.3%  | 1  | 1.5%  |    |       |   |       | 5     | 2.4%  |
|                                                      | RRMS                              | 37                                          | 92.5% | 61 | 88.4% | 61 | 89.7% | 22 | 95.7% | 8 | 88.9% | 189   | 90.4% |
|                                                      | SPMS                              | 1                                           | 2.5%  | 5  | 7.2%  | 6  | 8.8%  | 1  | 4.3%  | 1 | 11.1% | 14    | 6.7%  |
|                                                      | Keine Angabe                      | 1                                           | 2.5%  |    |       |    |       |    |       |   |       | 1     | 0.5%  |
| Dauer seit der Diagnose:                             | < 12 Monate                       | 5                                           | 12.5% | 4  | 5.8%  | 8  | 11.8% |    |       | 1 | 11.1% | 18    | 8.6%  |
|                                                      | 1 – 3 Jahre                       | 3                                           | 7.5%  | 9  | 13.0% | 16 | 23.5% | 1  | 4.3%  |   |       | 29    | 13.9% |
|                                                      | 3 – 5 Jahre                       | 5                                           | 12.5% | 14 | 20.3% | 6  | 8.8%  | 3  | 13.0% |   |       | 28    | 13.4% |
|                                                      | 5 – 10 Jahre                      | 10                                          | 25.0% | 16 | 23.2% | 13 | 19.1% | 3  | 13.0% | 3 | 33.3% | 45    | 21.5% |
|                                                      | 10 – 15 Jahre                     | 6                                           | 15.0% | 10 | 14.5% | 10 | 14.7% | 5  | 21.7% | 3 | 33.3% | 34    | 16.3% |
|                                                      | > 15 Jahre                        | 11                                          | 27.5% | 16 | 23.2% | 15 | 22.1% | 11 | 47.8% | 2 | 22.2% | 55    | 26.3% |
| Gespräch mit Neurologe bei Diagnose:                 | sehr gut/gut                      | 21                                          | 52.5% | 45 | 65.2% | 38 | 55.9% | 10 | 43.5% | 4 | 44.4% | 118   | 56.5% |
|                                                      | mittel                            | 6                                           | 15.0% | 7  | 10.1% | 6  | 8.8%  | 5  | 21.7% |   |       | 24    | 11.5% |
|                                                      | schlecht/sehr schlecht            | 12                                          | 30.0% | 16 | 23.2% | 23 | 33.8% | 8  | 34.8% | 3 | 33.3% | 62    | 29.7% |
|                                                      | Keine Angabe                      | 1                                           | 2.5%  | 1  | 1.4%  | 1  | 1.5%  |    |       | 2 | 22.2% | 5     | 2.4%  |

## 2.8 FRAGE 4: SICHERHEITSBEDÜRFNIS NACH KEY VARIABLEN II

| 1 = sehr sicherheitsbedacht - 5 = sehr risikofreudig |                    | 4. Einschätzung des Sicherheitsbedürfnisses |       |    |       |    |       |    |       |   |       | Total |       |
|------------------------------------------------------|--------------------|---------------------------------------------|-------|----|-------|----|-------|----|-------|---|-------|-------|-------|
|                                                      |                    | 1                                           |       | 2  |       | 3  |       | 4  |       | 5 |       | N     | col%  |
|                                                      |                    | N                                           | col%  | N  | col%  | N  | col%  | N  | col%  | N | col%  |       |       |
| Total                                                |                    | 40                                          | 100%  | 69 | 100%  | 68 | 100%  | 23 | 100%  | 9 | 100%  | 209   | 100%  |
| Zweitmeinung bei Diagnose:                           | ja                 | 7                                           | 17.5% | 9  | 13.0% | 15 | 22.1% | 9  | 39.1% | 1 | 11.1% | 41    | 19.6% |
|                                                      | nein               | 32                                          | 80.0% | 56 | 81.2% | 48 | 70.6% | 13 | 56.5% | 6 | 66.7% | 155   | 74.2% |
|                                                      | Keine Angabe       | 1                                           | 2.5%  | 4  | 5.8%  | 5  | 7.4%  | 1  | 4.3%  | 2 | 22.2% | 13    | 6.2%  |
| Therapieentscheid bei Erstdiagnose:                  | Aubagio            | 2                                           | 5.0%  |    |       | 2  | 2.9%  |    |       |   |       | 4     | 1.9%  |
|                                                      | Injizierbare       | 29                                          | 72.5% | 49 | 71.0% | 45 | 66.2% | 18 | 78.3% | 7 | 77.8% | 148   | 70.8% |
|                                                      | Gilenya            | 3                                           | 7.5%  | 14 | 20.3% | 3  | 4.4%  | 2  | 8.7%  |   |       | 22    | 10.5% |
|                                                      | Tecfidera          | 2                                           | 5.0%  | 2  | 2.9%  | 9  | 13.2% | 1  | 4.3%  |   |       | 14    | 6.7%  |
|                                                      | Tysabri            | 1                                           | 2.5%  | 2  | 2.9%  | 5  | 7.4%  | 1  | 4.3%  | 1 | 11.1% | 10    | 4.8%  |
|                                                      | Andere             | 1                                           | 2.5%  | 1  | 1.4%  | 1  | 1.5%  |    |       | 1 | 11.1% | 4     | 1.9%  |
|                                                      | Keine Angabe       | 2                                           | 5.0%  | 1  | 1.4%  | 3  | 4.4%  | 1  | 4.3%  |   |       | 7     | 3.3%  |
| Rebif bei Erstdiagnose:                              | nein               | 28                                          | 70.0% | 53 | 76.8% | 51 | 75.0% | 12 | 52.2% | 6 | 66.7% | 150   | 71.8% |
|                                                      | ja                 | 12                                          | 30.0% | 16 | 23.2% | 17 | 25.0% | 11 | 47.8% | 3 | 33.3% | 59    | 28.2% |
| Aktuelle Behandlung:                                 | Aubagio            | 4                                           | 10.0% | 1  | 1.4%  | 3  | 4.4%  |    |       |   |       | 8     | 3.8%  |
|                                                      | Injizierbare       | 10                                          | 25.0% | 12 | 17.4% | 11 | 16.2% | 2  | 8.7%  | 4 | 44.4% | 39    | 18.7% |
|                                                      | Gilenya            | 10                                          | 25.0% | 29 | 42.0% | 16 | 23.5% | 8  | 34.8% | 1 | 11.1% | 64    | 30.6% |
|                                                      | Tecfidera          | 4                                           | 10.0% | 6  | 8.7%  | 8  | 11.8% | 1  | 4.3%  |   |       | 19    | 9.1%  |
|                                                      | Tysabri            | 6                                           | 15.0% | 16 | 23.2% | 22 | 32.4% | 10 | 43.5% | 3 | 33.3% | 57    | 27.3% |
|                                                      | Andere             |                                             |       | 1  | 1.4%  | 2  | 2.9%  |    |       |   |       | 3     | 1.4%  |
|                                                      | keine Therapie     | 6                                           | 15.0% | 3  | 4.3%  | 6  | 8.8%  | 2  | 8.7%  |   |       | 17    | 8.1%  |
|                                                      | Keine Angabe       |                                             |       | 1  | 1.4%  |    |       |    |       | 1 | 11.1% | 2     | 1.0%  |
| Rebif ist aktuelle Behandlung:                       | nein               | 37                                          | 92.5% | 65 | 94.2% | 66 | 97.1% | 22 | 95.7% | 7 | 77.8% | 197   | 94.3% |
|                                                      | ja                 | 3                                           | 7.5%  | 4  | 5.8%  | 2  | 2.9%  | 1  | 4.3%  | 2 | 22.2% | 12    | 5.7%  |
| Anzahl MS Langzeit-Therapien:                        | Erste MS Therapie  | 12                                          | 30.0% | 19 | 27.5% | 20 | 29.4% | 2  | 8.7%  | 5 | 55.6% | 58    | 27.8% |
|                                                      | Zweite MS Therapie | 16                                          | 40.0% | 26 | 37.7% | 27 | 39.7% | 12 | 52.2% | 2 | 22.2% | 83    | 39.7% |
|                                                      | Dritte oder mehr   | 6                                           | 15.0% | 20 | 29.0% | 15 | 22.1% | 5  | 21.7% | 2 | 22.2% | 48    | 23.0% |
|                                                      | Keine Angabe       | 6                                           | 15.0% | 4  | 5.8%  | 6  | 8.8%  | 4  | 17.4% |   |       | 20    | 9.6%  |
| Rückblickend gleiche Therapie:                       | ja                 | 23                                          | 57.5% | 44 | 63.8% | 42 | 61.8% | 10 | 43.5% | 8 | 88.9% | 127   | 60.8% |
|                                                      | nein               | 12                                          | 30.0% | 15 | 21.7% | 17 | 25.0% | 9  | 39.1% | 1 | 11.1% | 54    | 25.8% |
|                                                      | Keine Angabe       | 5                                           | 12.5% | 10 | 14.5% | 9  | 13.2% | 4  | 17.4% |   |       | 28    | 13.4% |

## 2.9 FRAGE 5: FORM DER MS NACH KEY VARIABLEN I

|                                            |                                     | Form der MS: |        |      |        |      |        |              |        | Total |        |
|--------------------------------------------|-------------------------------------|--------------|--------|------|--------|------|--------|--------------|--------|-------|--------|
|                                            |                                     | CIS          |        | RRMS |        | SPMS |        | Keine Angabe |        | N     | col%   |
|                                            |                                     | N            | col%   | N    | col%   | N    | col%   | N            | col%   |       |        |
| Total                                      |                                     | 5            | 100.0% | 190  | 100.0% | 15   | 100.0% | 2            | 100.0% | 212   | 100.0% |
| Geschlecht:                                | Weiblich                            | 3            | 60.0%  | 144  | 75.8%  | 7    | 46.7%  | 1            | 50.0%  | 155   | 73.1%  |
|                                            | Männlich                            | 2            | 40.0%  | 45   | 23.7%  | 8    | 53.3%  |              |        | 55    | 25.9%  |
|                                            | Keine Angabe                        |              |        | 1    | 0.5%   |      |        | 1            | 50.0%  | 2     | 0.9%   |
|                                            |                                     |              |        |      |        |      |        |              |        |       |        |
| Altersgruppe:                              | bis 30 Jahre                        | 2            | 40.0%  | 31   | 16.3%  |      |        |              |        | 33    | 15.6%  |
|                                            | 31 – 40 Jahre                       | 1            | 20.0%  | 54   | 28.4%  | 1    | 6.7%   |              |        | 56    | 26.4%  |
|                                            | 41 – 45 Jahre                       |              |        | 34   | 17.9%  | 2    | 13.3%  | 1            | 50.0%  | 37    | 17.5%  |
|                                            | über 45 Jahre                       | 2            | 40.0%  | 70   | 36.8%  | 12   | 80.0%  |              |        | 84    | 39.6%  |
|                                            | Keine Angabe                        |              |        | 1    | 0.5%   |      |        | 1            | 50.0%  | 2     | 0.9%   |
| höchste<br>Berufsausbildung:               | Obligatorische Schule/Anlehre       |              |        | 16   | 8.4%   |      |        | 1            | 50.0%  | 17    | 8.0%   |
|                                            | Berufslehre/ - schule               | 2            | 40.0%  | 87   | 45.8%  | 9    | 60.0%  |              |        | 98    | 46.2%  |
|                                            | Höhere Fach- und Berufsausbildung   | 2            | 40.0%  | 53   | 27.9%  | 5    | 33.3%  |              |        | 60    | 28.3%  |
|                                            | Universität / Fachhochschule        | 1            | 20.0%  | 32   | 16.8%  | 1    | 6.7%   |              |        | 34    | 16.0%  |
|                                            | Keine Angabe                        |              |        | 2    | 1.1%   |      |        | 1            | 50.0%  | 3     | 1.4%   |
| 5. Welche Form der<br>MS haben Sie?        | CIS (klinisch isoliertes Syndrom)   | 5            | 100.0% |      |        |      |        |              |        | 5     | 2.4%   |
|                                            | RRMS (schubförmig remittierende MS) |              |        | 190  | 100.0% |      |        |              |        | 190   | 89.6%  |
|                                            | SPMS (sekundäre progrediente MS)    |              |        |      |        | 15   | 100.0% |              |        | 15    | 7.1%   |
|                                            | Keine Angabe                        |              |        |      |        |      |        | 2            | 100.0% | 2     | 0.9%   |
| Dauer seit der<br>Diagnose:                | < 12 Monate                         | 4            | 80.0%  | 14   | 7.4%   |      |        |              |        | 18    | 8.5%   |
|                                            | 1 – 3 Jahre                         |              |        | 28   | 14.7%  | 1    | 6.7%   |              |        | 29    | 13.7%  |
|                                            | 3 – 5 Jahre                         | 1            | 20.0%  | 27   | 14.2%  |      |        |              |        | 28    | 13.2%  |
|                                            | 5 – 10 Jahre                        |              |        | 45   | 23.7%  |      |        |              |        | 45    | 21.2%  |
|                                            | 10 – 15 Jahre                       |              |        | 32   | 16.8%  | 2    | 13.3%  | 1            | 50.0%  | 35    | 16.5%  |
|                                            | > 15 Jahre                          |              |        | 44   | 23.2%  | 12   | 80.0%  |              |        | 56    | 26.4%  |
|                                            | Keine Angabe                        |              |        |      |        |      |        | 1            | 50.0%  | 1     | 0.5%   |
| Gespräch mit<br>Neurologe bei<br>Diagnose: | sehr gut/gut                        | 3            | 60.0%  | 108  | 56.8%  | 7    | 46.7%  |              |        | 118   | 55.7%  |
|                                            | mittel                              |              |        | 21   | 11.1%  | 4    | 26.7%  | 1            | 50.0%  | 26    | 12.3%  |
|                                            | schlecht/sehr schlecht              | 2            | 40.0%  | 56   | 29.5%  | 4    | 26.7%  | 1            | 50.0%  | 63    | 29.7%  |
|                                            | Keine Angabe                        |              |        | 5    | 2.6%   |      |        |              |        | 5     | 2.4%   |

## 2.10 FRAGE 5: FORM DER MS NACH KEY VARIABLEN II

|                       |                    | Form der MS: |        |      |        |      |        |              |        | Total |        |
|-----------------------|--------------------|--------------|--------|------|--------|------|--------|--------------|--------|-------|--------|
|                       |                    | CIS          |        | RRMS |        | SPMS |        | Keine Angabe |        | N     | col%   |
|                       |                    | N            | col%   | N    | col%   | N    | col%   | N            | col%   |       |        |
| Total                 |                    | 5            | 100.0% | 190  | 100.0% | 15   | 100.0% | 2            | 100.0% | 212   | 100.0% |
| Zweitmeinung bei      | ja                 |              |        | 37   | 19.5%  | 4    | 26.7%  |              |        | 41    | 19.3%  |
| Diagnose:             | nein               | 5            | 100.0% | 142  | 74.7%  | 9    | 60.0%  | 2            | 100.0% | 158   | 74.5%  |
|                       | Keine Angabe       |              |        | 11   | 5.8%   | 2    | 13.3%  |              |        | 13    | 6.1%   |
| Therapieentscheid bei | Aubagio            |              |        | 3    | 1.6%   | 1    | 6.7%   |              |        | 4     | 1.9%   |
| Erstdiagnose:         | Injizierbare       | 5            | 100.0% | 134  | 70.5%  | 11   | 73.3%  | 1            | 50.0%  | 151   | 71.2%  |
|                       | Gilenya            |              |        | 21   | 11.1%  |      |        | 1            | 50.0%  | 22    | 10.4%  |
|                       | Tecfidera          |              |        | 14   | 7.4%   |      |        |              |        | 14    | 6.6%   |
|                       | Tysabri            |              |        | 10   | 5.3%   |      |        |              |        | 10    | 4.7%   |
|                       | Andere             |              |        | 3    | 1.6%   | 1    | 6.7%   |              |        | 4     | 1.9%   |
|                       | Keine Angabe       |              |        | 5    | 2.6%   | 2    | 13.3%  |              |        | 7     | 3.3%   |
| Rebif bei             | nein               | 2            | 40.0%  | 137  | 72.1%  | 11   | 73.3%  | 2            | 100.0% | 152   | 71.7%  |
| Erstdiagnose:         | ja                 | 3            | 60.0%  | 53   | 27.9%  | 4    | 26.7%  |              |        | 60    | 28.3%  |
| Aktuelle Behandlung:  | Aubagio            |              |        | 7    | 3.7%   | 1    | 6.7%   |              |        | 8     | 3.8%   |
|                       | Injizierbare       | 4            | 80.0%  | 33   | 17.4%  | 2    | 13.3%  |              |        | 39    | 18.4%  |
|                       | Gilenya            |              |        | 62   | 32.6%  | 1    | 6.7%   | 1            | 50.0%  | 64    | 30.2%  |
|                       | Tecfidera          |              |        | 19   | 10.0%  |      |        | 1            | 50.0%  | 20    | 9.4%   |
|                       | Tysabri            |              |        | 54   | 28.4%  | 3    | 20.0%  |              |        | 57    | 26.9%  |
|                       | Andere             |              |        | 2    | 1.1%   | 1    | 6.7%   |              |        | 3     | 1.4%   |
|                       | keine Therapie     | 1            | 20.0%  | 12   | 6.3%   | 6    | 40.0%  |              |        | 19    | 9.0%   |
|                       | Keine Angabe       |              |        | 1    | 0.5%   | 1    | 6.7%   |              |        | 2     | 0.9%   |
| Rebif ist aktuelle    | nein               | 3            | 60.0%  | 181  | 95.3%  | 14   | 93.3%  | 2            | 100.0% | 200   | 94.3%  |
| Behandlung:           | ja                 | 2            | 40.0%  | 9    | 4.7%   | 1    | 6.7%   |              |        | 12    | 5.7%   |
| Anzahl MS Langzeit-   | Erste MS Therapie  | 4            | 80.0%  | 50   | 26.3%  | 4    | 26.7%  |              |        | 58    | 27.4%  |
| Therapien:            | Zweite MS Therapie |              |        | 79   | 41.6%  | 4    | 26.7%  | 1            | 50.0%  | 84    | 39.6%  |
|                       | Dritte oder mehr   |              |        | 46   | 24.2%  | 1    | 6.7%   | 1            | 50.0%  | 48    | 22.6%  |
|                       | Keine Angabe       | 1            | 20.0%  | 15   | 7.9%   | 6    | 40.0%  |              |        | 22    | 10.4%  |
| Rückblickend gleiche  | ja                 | 4            | 80.0%  | 113  | 59.5%  | 9    | 60.0%  | 2            | 100.0% | 128   | 60.4%  |
| Therapie:             | nein               |              |        | 53   | 27.9%  | 3    | 20.0%  |              |        | 56    | 26.4%  |
|                       | Keine Angabe       | 1            | 20.0%  | 24   | 12.6%  | 3    | 20.0%  |              |        | 28    | 13.2%  |

**2.11 FRAGE 6: DAUER SEIT DER DIAGNOSE NACH KEY VARIABLEN I**

|                                             |                                   | Dauer seit der Diagnose: |        |             |        |             |        |              |        |               |        |            |        | Total |        |
|---------------------------------------------|-----------------------------------|--------------------------|--------|-------------|--------|-------------|--------|--------------|--------|---------------|--------|------------|--------|-------|--------|
|                                             |                                   | < 12 Monate              |        | 1 – 3 Jahre |        | 3 – 5 Jahre |        | 5 – 10 Jahre |        | 10 – 15 Jahre |        | > 15 Jahre |        | N     | col%   |
|                                             |                                   | N                        | col%   | N           | col%   | N           | col%   | N            | col%   | N             | col%   | N          | col%   |       |        |
| Total                                       |                                   | 18                       | 100.0% | 29          | 100.0% | 28          | 100.0% | 45           | 100.0% | 35            | 100.0% | 56         | 100.0% | 211   | 100.0% |
| Geschlecht:                                 | Weiblich                          | 12                       | 66.7%  | 24          | 82.8%  | 19          | 67.9%  | 32           | 71.1%  | 23            | 65.7%  | 45         | 80.4%  | 155   | 73.5%  |
|                                             | Männlich                          | 6                        | 33.3%  | 5           | 17.2%  | 9           | 32.1%  | 12           | 26.7%  | 12            | 34.3%  | 11         | 19.6%  | 55    | 26.1%  |
|                                             | Keine Angabe                      |                          |        |             |        |             |        | 1            | 2.2%   |               |        |            |        | 1     | 0.5%   |
|                                             |                                   |                          |        |             |        |             |        |              |        |               |        |            |        |       |        |
| Altersgruppe:                               | bis 30 Jahre                      | 7                        | 38.9%  | 13          | 44.8%  | 7           | 25.0%  | 6            | 13.3%  |               |        |            |        | 33    | 15.6%  |
|                                             | 31 – 40 Jahre                     | 6                        | 33.3%  | 11          | 37.9%  | 9           | 32.1%  | 13           | 28.9%  | 10            | 28.6%  | 7          | 12.5%  | 56    | 26.5%  |
|                                             | 41 – 45 Jahre                     | 2                        | 11.1%  | 1           | 3.4%   | 4           | 14.3%  | 11           | 24.4%  | 10            | 28.6%  | 9          | 16.1%  | 37    | 17.5%  |
|                                             | über 45 Jahre                     | 3                        | 16.7%  | 4           | 13.8%  | 8           | 28.6%  | 14           | 31.1%  | 15            | 42.9%  | 40         | 71.4%  | 84    | 39.8%  |
|                                             | Keine Angabe                      |                          |        |             |        |             |        | 1            | 2.2%   |               |        |            |        | 1     | 0.5%   |
| höchste<br>Berufsausbildung:                | Obligatorische Schule/Anlehre     |                          |        | 2           | 6.9%   | 1           | 3.6%   | 5            | 11.1%  | 5             | 14.3%  | 4          | 7.1%   | 17    | 8.1%   |
|                                             | Berufslehre/ - schule             | 5                        | 27.8%  | 13          | 44.8%  | 15          | 53.6%  | 18           | 40.0%  | 16            | 45.7%  | 31         | 55.4%  | 98    | 46.4%  |
|                                             | Höhere Fach- und Berufsausbildung | 5                        | 27.8%  | 8           | 27.6%  | 5           | 17.9%  | 13           | 28.9%  | 11            | 31.4%  | 18         | 32.1%  | 60    | 28.4%  |
|                                             | Universität / Fachhochschule      | 8                        | 44.4%  | 5           | 17.2%  | 7           | 25.0%  | 8            | 17.8%  | 3             | 8.6%   | 3          | 5.4%   | 34    | 16.1%  |
|                                             | Keine Angabe                      |                          |        | 1           | 3.4%   |             |        | 1            | 2.2%   |               |        |            |        | 2     | 0.9%   |
| Form der MS:                                | CIS                               | 4                        | 22.2%  |             |        | 1           | 3.6%   |              |        |               |        |            |        | 5     | 2.4%   |
|                                             | RRMS                              | 14                       | 77.8%  | 28          | 96.6%  | 27          | 96.4%  | 45           | 100.0% | 32            | 91.4%  | 44         | 78.6%  | 190   | 90.0%  |
|                                             | SPMS                              |                          |        | 1           | 3.4%   |             |        |              |        | 2             | 5.7%   | 12         | 21.4%  | 15    | 7.1%   |
|                                             | Keine Angabe                      |                          |        |             |        |             |        |              |        | 1             | 2.9%   |            |        | 1     | 0.5%   |
| 6. Wie lange liegt ihre<br>Diagnose zurück? | <= 6 Monate                       | 8                        | 44.4%  |             |        |             |        |              |        |               |        |            |        | 8     | 3.8%   |
|                                             | > 6 – 12 Monate                   | 10                       | 55.6%  |             |        |             |        |              |        |               |        |            |        | 10    | 4.7%   |
|                                             | > 1 – 3 Jahre                     |                          |        | 29          | 100.0% |             |        |              |        |               |        |            |        | 29    | 13.7%  |
|                                             | > 3 – 5 Jahre                     |                          |        |             |        | 28          | 100.0% |              |        |               |        |            |        | 28    | 13.3%  |
|                                             | > 5 – 10 Jahre                    |                          |        |             |        |             |        | 45           | 100.0% |               |        |            |        | 45    | 21.3%  |
|                                             | > 10 – 15 Jahre                   |                          |        |             |        |             |        |              |        | 35            | 100.0% |            |        | 35    | 16.6%  |
|                                             | > 15 Jahre                        |                          |        |             |        |             |        |              |        |               |        | 56         | 100.0% | 56    | 26.5%  |
| Gespräch mit<br>Neurologe bei<br>Diagnose:  | sehr gut/gut                      | 11                       | 61.1%  | 24          | 82.8%  | 20          | 71.4%  | 26           | 57.8%  | 13            | 37.1%  | 24         | 42.9%  | 118   | 55.9%  |
|                                             | mittel                            | 1                        | 5.6%   | 3           | 10.3%  | 1           | 3.6%   | 3            | 6.7%   | 8             | 22.9%  | 10         | 17.9%  | 26    | 12.3%  |
|                                             | schlecht/sehr schlecht            | 6                        | 33.3%  | 2           | 6.9%   | 7           | 25.0%  | 14           | 31.1%  | 12            | 34.3%  | 21         | 37.5%  | 62    | 29.4%  |
|                                             | Keine Angabe                      |                          |        |             |        |             |        | 2            | 4.4%   | 2             | 5.7%   | 1          | 1.8%   | 5     | 2.4%   |

**2.12 FRAGE 6: DAUER SEIT DER DIAGNOSE NACH KEY VARIABLEN II**

|                                     |                    | Dauer seit der Diagnose: |        |             |        |             |        |              |        |               |        |            |        | Total |        |
|-------------------------------------|--------------------|--------------------------|--------|-------------|--------|-------------|--------|--------------|--------|---------------|--------|------------|--------|-------|--------|
|                                     |                    | < 12 Monate              |        | 1 – 3 Jahre |        | 3 – 5 Jahre |        | 5 – 10 Jahre |        | 10 – 15 Jahre |        | > 15 Jahre |        | N     | col%   |
|                                     |                    | N                        | col%   | N           | col%   | N           | col%   | N            | col%   | N             | col%   | N          | col%   |       |        |
| Total                               |                    | 18                       | 100.0% | 29          | 100.0% | 28          | 100.0% | 45           | 100.0% | 35            | 100.0% | 56         | 100.0% | 211   | 100.0% |
| Zweitmeinung bei Diagnose:          | ja                 | 3                        | 16.7%  | 5           | 17.2%  | 4           | 14.3%  | 9            | 20.0%  | 4             | 11.4%  | 16         | 28.6%  | 41    | 19.4%  |
|                                     | nein               | 12                       | 66.7%  | 23          | 79.3%  | 22          | 78.6%  | 36           | 80.0%  | 29            | 82.9%  | 35         | 62.5%  | 157   | 74.4%  |
|                                     | Keine Angabe       | 3                        | 16.7%  | 1           | 3.4%   | 2           | 7.1%   |              |        | 2             | 5.7%   | 5          | 8.9%   | 13    | 6.2%   |
|                                     |                    |                          |        |             |        |             |        |              |        |               |        |            |        |       |        |
| Therapieentscheid bei Erstdiagnose: | Aubagio            |                          |        | 3           | 10.3%  | 1           | 3.6%   |              |        |               |        |            |        | 4     | 1.9%   |
|                                     | Injizierbare       | 7                        | 38.9%  | 8           | 27.6%  | 15          | 53.6%  | 40           | 88.9%  | 31            | 88.6%  | 49         | 87.5%  | 150   | 71.1%  |
|                                     | Gilenya            | 1                        | 5.6%   | 9           | 31.0%  | 8           | 28.6%  | 3            | 6.7%   | 1             | 2.9%   |            |        | 22    | 10.4%  |
|                                     | Tecfidera          | 3                        | 16.7%  | 8           | 27.6%  | 1           | 3.6%   | 1            | 2.2%   | 1             | 2.9%   |            |        | 14    | 6.6%   |
|                                     | Tysabri            | 2                        | 11.1%  | 1           | 3.4%   | 3           | 10.7%  | 1            | 2.2%   | 1             | 2.9%   | 2          | 3.6%   | 10    | 4.7%   |
|                                     | Andere             | 3                        | 16.7%  |             |        |             |        |              |        |               |        | 1          | 1.8%   | 4     | 1.9%   |
|                                     | Keine Angabe       | 2                        | 11.1%  |             |        |             |        |              |        | 1             | 2.9%   | 4          | 7.1%   | 7     | 3.3%   |
|                                     |                    |                          |        |             |        |             |        |              |        |               |        |            |        |       |        |
| Rebif bei Erstdiagnose:             | nein               | 16                       | 88.9%  | 27          | 93.1%  | 22          | 78.6%  | 28           | 62.2%  | 22            | 62.9%  | 36         | 64.3%  | 151   | 71.6%  |
|                                     | ja                 | 2                        | 11.1%  | 2           | 6.9%   | 6           | 21.4%  | 17           | 37.8%  | 13            | 37.1%  | 20         | 35.7%  | 60    | 28.4%  |
| Aktuelle Behandlung:                | Aubagio            |                          |        | 3           | 10.3%  | 1           | 3.6%   | 3            | 6.7%   |               |        | 1          | 1.8%   | 8     | 3.8%   |
|                                     | Injizierbare       | 5                        | 27.8%  | 6           | 20.7%  | 4           | 14.3%  | 6            | 13.3%  | 4             | 11.4%  | 14         | 25.0%  | 39    | 18.5%  |
|                                     | Gilenya            | 2                        | 11.1%  | 10          | 34.5%  | 14          | 50.0%  | 19           | 42.2%  | 10            | 28.6%  | 9          | 16.1%  | 64    | 30.3%  |
|                                     | Tecfidera          | 2                        | 11.1%  | 5           | 17.2%  |             |        | 1            | 2.2%   | 4             | 11.4%  | 7          | 12.5%  | 19    | 9.0%   |
|                                     | Tysabri            | 3                        | 16.7%  | 5           | 17.2%  | 8           | 28.6%  | 14           | 31.1%  | 13            | 37.1%  | 14         | 25.0%  | 57    | 27.0%  |
|                                     | Andere             |                          |        |             |        |             |        |              |        | 1             | 2.9%   | 2          | 3.6%   | 3     | 1.4%   |
|                                     | keine Therapie     | 6                        | 33.3%  |             |        | 1           | 3.6%   | 2            | 4.4%   | 2             | 5.7%   | 8          | 14.3%  | 19    | 9.0%   |
|                                     | Keine Angabe       |                          |        |             |        |             |        |              |        | 1             | 2.9%   | 1          | 1.8%   | 2     | 0.9%   |
| Rebif ist aktuelle Behandlung:      | nein               | 17                       | 94.4%  | 29          | 100.0% | 25          | 89.3%  | 44           | 97.8%  | 35            | 100.0% | 49         | 87.5%  | 199   | 94.3%  |
|                                     | ja                 | 1                        | 5.6%   |             |        | 3           | 10.7%  | 1            | 2.2%   |               |        | 7          | 12.5%  | 12    | 5.7%   |
| Anzahl MS Langzeit-Therapien:       | Erste MS Therapie  | 10                       | 55.6%  | 18          | 62.1%  | 10          | 35.7%  | 9            | 20.0%  | 3             | 8.6%   | 8          | 14.3%  | 58    | 27.5%  |
|                                     | Zweite MS Therapie | 1                        | 5.6%   | 9           | 31.0%  | 13          | 46.4%  | 20           | 44.4%  | 14            | 40.0%  | 26         | 46.4%  | 83    | 39.3%  |
|                                     | Dritte oder mehr   | 1                        | 5.6%   | 2           | 6.9%   | 4           | 14.3%  | 13           | 28.9%  | 16            | 45.7%  | 12         | 21.4%  | 48    | 22.7%  |
|                                     | Keine Angabe       | 6                        | 33.3%  |             |        | 1           | 3.6%   | 3            | 6.7%   | 2             | 5.7%   | 10         | 17.9%  | 22    | 10.4%  |
| Rückblickend gleiche Therapie:      | ja                 | 12                       | 66.7%  | 18          | 62.1%  | 17          | 60.7%  | 23           | 51.1%  | 23            | 65.7%  | 34         | 60.7%  | 127   | 60.2%  |
|                                     | nein               | 3                        | 16.7%  | 8           | 27.6%  | 9           | 32.1%  | 14           | 31.1%  | 10            | 28.6%  | 12         | 21.4%  | 56    | 26.5%  |
|                                     | Keine Angabe       | 3                        | 16.7%  | 3           | 10.3%  | 2           | 7.1%   | 8            | 17.8%  | 2             | 5.7%   | 10         | 17.9%  | 28    | 13.3%  |

## 2.13 FRAGE 7: ORT DER AKTUELLEN BEHANDLUNG NACH KEY VARIABLEN I

|                                            |                                   | 7. Wo befinden Sie sich aktuell in neurologischer Behandlung? |        |                 |       |              |      | Total |        |
|--------------------------------------------|-----------------------------------|---------------------------------------------------------------|--------|-----------------|-------|--------------|------|-------|--------|
|                                            |                                   | In einer privaten Praxis<br>(auch Gruppenpraxis)              |        | In einem Spital |       | Keine Angabe |      | N     | col%   |
|                                            |                                   | N                                                             | row%   | N               | row%  | N            | row% |       |        |
| Total                                      |                                   | 125                                                           | 59.0%  | 85              | 40.1% | 2            | 0.9% | 212   | 100.0% |
| Geschlecht:                                | Weiblich                          | 91                                                            | 58.7%  | 63              | 40.6% | 1            | 0.6% | 155   | 73.1%  |
|                                            | Männlich                          | 32                                                            | 58.2%  | 22              | 40.0% | 1            | 1.8% | 55    | 25.9%  |
|                                            | Keine Angabe                      | 2                                                             | 100.0% |                 |       |              |      | 2     | 0.9%   |
|                                            |                                   |                                                               |        |                 |       |              |      |       |        |
| Altersgruppe:                              | bis 30 Jahre                      | 10                                                            | 30.3%  | 23              | 69.7% |              |      | 33    | 15.6%  |
|                                            | 31 – 40 Jahre                     | 35                                                            | 62.5%  | 21              | 37.5% |              |      | 56    | 26.4%  |
|                                            | 41 – 45 Jahre                     | 26                                                            | 70.3%  | 11              | 29.7% |              |      | 37    | 17.5%  |
|                                            | über 45 Jahre                     | 52                                                            | 61.9%  | 30              | 35.7% | 2            | 2.4% | 84    | 39.6%  |
|                                            | Keine Angabe                      | 2                                                             | 100.0% |                 |       |              |      | 2     | 0.9%   |
|                                            |                                   |                                                               |        |                 |       |              |      |       |        |
| höchste<br>Berufsausbildung:               | Obligatorische Schule/Anlehre     | 4                                                             | 23.5%  | 13              | 76.5% |              |      | 17    | 8.0%   |
|                                            | Berufslehre/ - schule             | 60                                                            | 61.2%  | 36              | 36.7% | 2            | 2.0% | 98    | 46.2%  |
|                                            | Höhere Fach- und Berufsausbildung | 35                                                            | 58.3%  | 25              | 41.7% |              |      | 60    | 28.3%  |
|                                            | Universität / Fachhochschule      | 24                                                            | 70.6%  | 10              | 29.4% |              |      | 34    | 16.0%  |
|                                            | Keine Angabe                      | 2                                                             | 66.7%  | 1               | 33.3% |              |      | 3     | 1.4%   |
| Form der MS:                               | CIS                               | 3                                                             | 60.0%  | 2               | 40.0% |              |      | 5     | 2.4%   |
|                                            | RRMS                              | 112                                                           | 58.9%  | 77              | 40.5% | 1            | 0.5% | 190   | 89.6%  |
|                                            | SPMS                              | 9                                                             | 60.0%  | 5               | 33.3% | 1            | 6.7% | 15    | 7.1%   |
|                                            | Keine Angabe                      | 1                                                             | 50.0%  | 1               | 50.0% |              |      | 2     | 0.9%   |
| Dauer seit der<br>Diagnose:                | < 12 Monate                       | 8                                                             | 44.4%  | 10              | 55.6% |              |      | 18    | 8.5%   |
|                                            | 1 – 3 Jahre                       | 12                                                            | 41.4%  | 17              | 58.6% |              |      | 29    | 13.7%  |
|                                            | 3 – 5 Jahre                       | 15                                                            | 53.6%  | 13              | 46.4% |              |      | 28    | 13.2%  |
|                                            | 5 – 10 Jahre                      | 31                                                            | 68.9%  | 14              | 31.1% |              |      | 45    | 21.2%  |
|                                            | 10 – 15 Jahre                     | 17                                                            | 48.6%  | 17              | 48.6% | 1            | 2.9% | 35    | 16.5%  |
|                                            | > 15 Jahre                        | 41                                                            | 73.2%  | 14              | 25.0% | 1            | 1.8% | 56    | 26.4%  |
|                                            | Keine Angabe                      | 1                                                             | 100.0% |                 |       |              |      | 1     | 0.5%   |
| Gespräch mit<br>Neurologe bei<br>Diagnose: | sehr gut/gut                      | 65                                                            | 55.1%  | 53              | 44.9% |              |      | 118   | 55.7%  |
|                                            | mittel                            | 17                                                            | 65.4%  | 8               | 30.8% | 1            | 3.8% | 26    | 12.3%  |
|                                            | schlecht/sehr schlecht            | 40                                                            | 63.5%  | 22              | 34.9% | 1            | 1.6% | 63    | 29.7%  |
|                                            | Keine Angabe                      | 3                                                             | 60.0%  | 2               | 40.0% |              |      | 5     | 2.4%   |

## 2.14 FRAGE 7: ORT DER AKTUELLEN BEHANDLUNG NACH KEY VARIABLEN II

|                       |                    | 7. Wo befinden Sie sich aktuell in neurologischer Behandlung? |       |                 |       |              |       | Total |        |
|-----------------------|--------------------|---------------------------------------------------------------|-------|-----------------|-------|--------------|-------|-------|--------|
|                       |                    | In einer privaten Praxis<br>(auch Gruppenpraxis)              |       | In einem Spital |       | Keine Angabe |       | N     | col%   |
|                       |                    | N                                                             | row%  | N               | row%  | N            | row%  |       |        |
| Total                 |                    | 125                                                           | 59.0% | 85              | 40.1% | 2            | 0.9%  | 212   | 100.0% |
| Zweitmeinung bei      | ja                 | 29                                                            | 70.7% | 12              | 29.3% |              |       | 41    | 19.3%  |
| Diagnose:             | nein               | 86                                                            | 54.4% | 70              | 44.3% | 2            | 1.3%  | 158   | 74.5%  |
|                       | Keine Angabe       | 10                                                            | 76.9% | 3               | 23.1% |              |       | 13    | 6.1%   |
| Therapieentscheid bei | Aubagio            | 1                                                             | 25.0% | 3               | 75.0% |              |       | 4     | 1.9%   |
| Erstdiagnose:         | Injizierbare       | 93                                                            | 61.6% | 56              | 37.1% | 2            | 1.3%  | 151   | 71.2%  |
|                       | Gilenya            | 13                                                            | 59.1% | 9               | 40.9% |              |       | 22    | 10.4%  |
|                       | Tecfidera          | 4                                                             | 28.6% | 10              | 71.4% |              |       | 14    | 6.6%   |
|                       | Tysabri            | 8                                                             | 80.0% | 2               | 20.0% |              |       | 10    | 4.7%   |
|                       | Andere             | 2                                                             | 50.0% | 2               | 50.0% |              |       | 4     | 1.9%   |
|                       | Keine Angabe       | 4                                                             | 57.1% | 3               | 42.9% |              |       | 7     | 3.3%   |
| Rebif bei             | nein               | 82                                                            | 53.9% | 68              | 44.7% | 2            | 1.3%  | 152   | 71.7%  |
| Erstdiagnose:         | ja                 | 43                                                            | 71.7% | 17              | 28.3% |              |       | 60    | 28.3%  |
| Aktuelle Behandlung:  | Aubagio            | 3                                                             | 37.5% | 5               | 62.5% |              |       | 8     | 3.8%   |
|                       | Injizierbare       | 25                                                            | 64.1% | 14              | 35.9% |              |       | 39    | 18.4%  |
|                       | Gilenya            | 37                                                            | 57.8% | 27              | 42.2% |              |       | 64    | 30.2%  |
|                       | Tecfidera          | 10                                                            | 50.0% | 10              | 50.0% |              |       | 20    | 9.4%   |
|                       | Tysabri            | 37                                                            | 64.9% | 20              | 35.1% |              |       | 57    | 26.9%  |
|                       | Andere             | 1                                                             | 33.3% | 2               | 66.7% |              |       | 3     | 1.4%   |
|                       | keine Therapie     | 11                                                            | 57.9% | 7               | 36.8% | 1            | 5.3%  | 19    | 9.0%   |
|                       | Keine Angabe       | 1                                                             | 50.0% |                 |       | 1            | 50.0% | 2     | 0.9%   |
| Rebif ist aktuelle    | nein               | 117                                                           | 58.5% | 81              | 40.5% | 2            | 1.0%  | 200   | 94.3%  |
| Behandlung:           | ja                 | 8                                                             | 66.7% | 4               | 33.3% |              |       | 12    | 5.7%   |
| Anzahl MS Langzeit-   | Erste MS Therapie  | 31                                                            | 53.4% | 27              | 46.6% |              |       | 58    | 27.4%  |
| Therapien:            | Zweite MS Therapie | 52                                                            | 61.9% | 32              | 38.1% |              |       | 84    | 39.6%  |
|                       | Dritte oder mehr   | 28                                                            | 58.3% | 19              | 39.6% | 1            | 2.1%  | 48    | 22.6%  |
|                       | Keine Angabe       | 14                                                            | 63.6% | 7               | 31.8% | 1            | 4.5%  | 22    | 10.4%  |
| Rückblickend gleiche  | ja                 | 75                                                            | 58.6% | 52              | 40.6% | 1            | 0.8%  | 128   | 60.4%  |
| Therapie:             | nein               | 32                                                            | 57.1% | 23              | 41.1% | 1            | 1.8%  | 56    | 26.4%  |
|                       | Keine Angabe       | 18                                                            | 64.3% | 10              | 35.7% |              |       | 28    | 13.2%  |

## 2.15 FRAGE 8: WELCHEN STELLENWERT HABEN FOLGENDE PUNKTE FÜR SIE IM RAHMEN DER KRANKHEIT?

1 = niedriger Stellenwert - 5 = sehr hoher Stellenwert

|                                        | Auswertbare Fragebogen |      |                    |        |         |               |               |         |
|----------------------------------------|------------------------|------|--------------------|--------|---------|---------------|---------------|---------|
|                                        | ja                     |      |                    |        |         |               |               |         |
|                                        | Valid N                | Mean | Standard Deviation | Median | Minimum | Percentile 25 | Percentile 75 | Maximum |
| Schubfreiheit                          | 202                    | 4.8  | 0.6                | 5.0    | 1.0     | 5.0           | 5.0           | 5.0     |
| Verzögerung der<br>Behinderungszunahme | 199                    | 4.8  | 0.6                | 5.0    | 1.0     | 5.0           | 5.0           | 5.0     |
| Kinder/Familienplanung                 | 180                    | 3.0  | 1.8                | 3.0    | 1.0     | 1.0           | 5.0           | 5.0     |
| Arbeit                                 | 191                    | 4.1  | 1.1                | 4.0    | 1.0     | 3.0           | 5.0           | 5.0     |
| Partnerschaft                          | 194                    | 4.4  | 1.0                | 5.0    | 1.0     | 4.0           | 5.0           | 5.0     |
| Unabhängigkeit                         | 201                    | 4.8  | 0.6                | 5.0    | 1.0     | 5.0           | 5.0           | 5.0     |
| Soziales<br>Umfeld/Beziehungen         | 201                    | 4.5  | 0.8                | 5.0    | 1.0     | 4.0           | 5.0           | 5.0     |

2.16 FRAGE 9: WELCHE MS-LANGZEITTHERAPEUTIKA KENNEN SIE?

|                                                   |           | Aktuelle Behandlung: |       |              |       |         |       |           |       |         |       |        |       |                |       | Total |       |
|---------------------------------------------------|-----------|----------------------|-------|--------------|-------|---------|-------|-----------|-------|---------|-------|--------|-------|----------------|-------|-------|-------|
|                                                   |           | Aubagio              |       | Injizierbare |       | Gilenya |       | Tecfidera |       | Tysabri |       | Andere |       | keine Therapie |       | N     | col%  |
|                                                   |           | N                    | col%  | N            | col%  | N       | col%  | N         | col%  | N       | col%  | N      | col%  | N              | col%  |       |       |
| Total                                             |           | 8                    | 100%  | 39           | 100%  | 64      | 100%  | 20        | 100%  | 57      | 100%  | 3      | 100%  | 19             | 100%  | 210   | 100%  |
| Welche MS-<br>Langzeittherapeutika<br>kennen Sie? | Aubagio   | 8                    | 100%  | 7            | 17.9% | 10      | 15.6% | 3         | 15.0% | 3       | 5.3%  |        |       | 6              | 31.6% | 37    | 17.6% |
|                                                   | Avonex    | 1                    | 12.5% | 24           | 61.5% | 22      | 34.4% | 4         | 20.0% | 18      | 31.6% | 2      | 66.7% | 8              | 42.1% | 79    | 37.6% |
|                                                   | Betaferon | 2                    | 25.0% | 17           | 43.6% | 35      | 54.7% | 7         | 35.0% | 30      | 52.6% | 3      | 100%  | 9              | 47.4% | 103   | 49.0% |
|                                                   | Copaxone  | 1                    | 12.5% | 19           | 48.7% | 27      | 42.2% | 5         | 25.0% | 19      | 33.3% | 1      | 33.3% | 8              | 42.1% | 80    | 38.1% |
|                                                   | Gilenya   | 3                    | 37.5% | 15           | 38.5% | 63      | 98.4% | 6         | 30.0% | 29      | 50.9% | 2      | 66.7% | 11             | 57.9% | 129   | 61.4% |
|                                                   | Lemtrada  |                      |       | 2            | 5.1%  | 5       | 7.8%  |           |       | 6       | 10.5% | 1      | 33.3% | 6              | 31.6% | 20    | 9.5%  |
|                                                   | Plegridy  |                      |       | 6            | 15.4% | 3       | 4.7%  |           |       | 1       | 1.8%  |        |       | 6              | 31.6% | 16    | 7.6%  |
|                                                   | Rebif     | 6                    | 75.0% | 23           | 59.0% | 30      | 46.9% | 9         | 45.0% | 22      | 38.6% | 2      | 66.7% | 13             | 68.4% | 105   | 50.0% |
|                                                   | Tecfidera | 1                    | 12.5% | 10           | 25.6% | 19      | 29.7% | 18        | 90.0% | 10      | 17.5% |        |       | 10             | 52.6% | 68    | 32.4% |
|                                                   | Tysabri   |                      |       | 13           | 33.3% | 31      | 48.4% | 2         | 10.0% | 57      | 100%  | 3      | 100%  | 12             | 63.2% | 118   | 56.2% |
|                                                   | Andere    |                      |       | 1            | 2.6%  | 1       | 1.6%  |           |       | 1       | 1.8%  | 1      | 33.3% | 3              | 15.8% | 7     | 3.3%  |

**2.17 FRAGE 10: AKTUELLE BEHANDLUNG NACH KEY VARIABLEN I**

|                                            |                                   | Aktuelle Behandlung: |       |              |       |         |       |           |       |         |       |        |       | Total          |       |
|--------------------------------------------|-----------------------------------|----------------------|-------|--------------|-------|---------|-------|-----------|-------|---------|-------|--------|-------|----------------|-------|
|                                            |                                   | Aubagio              |       | Injizierbare |       | Gilenya |       | Tecfidera |       | Tysabri |       | Andere |       | keine Therapie |       |
|                                            |                                   | N                    | col%  | N            | col%  | N       | col%  | N         | col%  | N       | col%  | N      | col%  | N              | col%  |
| Total                                      |                                   | 8                    | 100%  | 39           | 100%  | 64      | 100%  | 20        | 100%  | 57      | 100%  | 3      | 100%  | 19             | 100%  |
| Geschlecht:                                | Weiblich                          | 5                    | 62.5% | 32           | 82.1% | 42      | 65.6% | 15        | 75.0% | 44      | 77.2% | 2      | 66.7% | 15             | 78.9% |
|                                            | Männlich                          | 3                    | 37.5% | 7            | 17.9% | 22      | 34.4% | 4         | 20.0% | 12      | 21.1% | 1      | 33.3% | 4              | 21.1% |
|                                            | Keine Angabe                      |                      |       |              |       |         |       | 1         | 5.0%  | 1       | 1.8%  |        |       | 2              | 1.0%  |
| Altersgruppe:                              | bis 30 Jahre                      |                      |       | 5            | 12.8% | 13      | 20.3% | 5         | 25.0% | 8       | 14.0% |        |       | 2              | 10.5% |
|                                            | 31 – 40 Jahre                     | 1                    | 12.5% | 7            | 17.9% | 14      | 21.9% | 5         | 25.0% | 22      | 38.6% | 1      | 33.3% | 6              | 31.6% |
|                                            | 41 – 45 Jahre                     | 3                    | 37.5% | 2            | 5.1%  | 16      | 25.0% | 2         | 10.0% | 11      | 19.3% | 1      | 33.3% | 2              | 10.5% |
|                                            | über 45 Jahre                     | 4                    | 50.0% | 25           | 64.1% | 21      | 32.8% | 7         | 35.0% | 15      | 26.3% | 1      | 33.3% | 9              | 47.4% |
|                                            | Keine Angabe                      |                      |       |              |       |         |       | 1         | 5.0%  | 1       | 1.8%  |        |       | 2              | 1.0%  |
| höchste<br>Berufsausbildung:               | Obligatorische Schule/Anlehre     | 2                    | 25.0% | 1            | 2.6%  | 6       | 9.4%  | 3         | 15.0% | 5       | 8.8%  |        |       |                | 17    |
|                                            | Berufslehre/ - schule             | 3                    | 37.5% | 16           | 41.0% | 30      | 46.9% | 6         | 30.0% | 28      | 49.1% | 2      | 66.7% | 12             | 63.2% |
|                                            | Höhere Fach- und Berufsausbildung | 2                    | 25.0% | 15           | 38.5% | 20      | 31.3% | 5         | 25.0% | 13      | 22.8% | 1      | 33.3% | 3              | 15.8% |
|                                            | Universität / Fachhochschule      | 1                    | 12.5% | 7            | 17.9% | 8       | 12.5% | 4         | 20.0% | 10      | 17.5% |        |       | 4              | 21.1% |
|                                            | Keine Angabe                      |                      |       |              |       |         |       | 2         | 10.0% | 1       | 1.8%  |        |       | 3              | 1.4%  |
| Form der MS:                               | CIS                               |                      |       | 4            | 10.3% |         |       |           |       |         |       |        |       | 1              | 5.3%  |
|                                            | RRMS                              | 7                    | 87.5% | 33           | 84.6% | 62      | 96.9% | 19        | 95.0% | 54      | 94.7% | 2      | 66.7% | 12             | 63.2% |
|                                            | SPMS                              | 1                    | 12.5% | 2            | 5.1%  | 1       | 1.6%  |           |       | 3       | 5.3%  | 1      | 33.3% | 6              | 31.6% |
|                                            | Keine Angabe                      |                      |       |              |       | 1       | 1.6%  | 1         | 5.0%  |         |       |        |       | 2              | 1.0%  |
| Dauer seit der<br>Diagnose:                | < 12 Monate                       |                      |       | 5            | 12.8% | 2       | 3.1%  | 2         | 10.0% | 3       | 5.3%  |        |       | 6              | 31.6% |
|                                            | 1 – 3 Jahre                       | 3                    | 37.5% | 6            | 15.4% | 10      | 15.6% | 5         | 25.0% | 5       | 8.8%  |        |       |                | 29    |
|                                            | 3 – 5 Jahre                       | 1                    | 12.5% | 4            | 10.3% | 14      | 21.9% |           |       | 8       | 14.0% |        |       | 1              | 5.3%  |
|                                            | 5 – 10 Jahre                      | 3                    | 37.5% | 6            | 15.4% | 19      | 29.7% | 1         | 5.0%  | 14      | 24.6% |        |       | 2              | 10.5% |
|                                            | 10 – 15 Jahre                     |                      |       | 4            | 10.3% | 10      | 15.6% | 4         | 20.0% | 13      | 22.8% | 1      | 33.3% | 2              | 10.5% |
|                                            | > 15 Jahre                        | 1                    | 12.5% | 14           | 35.9% | 9       | 14.1% | 7         | 35.0% | 14      | 24.6% | 2      | 66.7% | 8              | 42.1% |
|                                            | Keine Angabe                      |                      |       |              |       |         |       | 1         | 5.0%  |         |       |        |       | 1              | 0.5%  |
| Gespräch mit<br>Neurologe bei<br>Diagnose: | sehr gut/gut                      | 7                    | 87.5% | 21           | 53.8% | 41      | 64.1% | 13        | 65.0% | 30      | 52.6% | 1      | 33.3% | 5              | 26.3% |
|                                            | mittel                            | 1                    | 12.5% | 5            | 12.8% | 8       | 12.5% | 2         | 10.0% | 4       | 7.0%  |        |       | 6              | 31.6% |
|                                            | schlecht/sehr schlecht            |                      |       | 12           | 30.8% | 14      | 21.9% | 4         | 20.0% | 21      | 36.8% | 2      | 66.7% | 8              | 42.1% |
|                                            | Keine Angabe                      |                      |       | 1            | 2.6%  | 1       | 1.6%  | 1         | 5.0%  | 2       | 3.5%  |        |       | 5              | 2.4%  |

**2.18 FRAGE 10: AKTUELLE BEHANDLUNG NACH KEY VARIABLEN II**

|                                                                   |                                    | Aktuelle Behandlung: |       |              |       |         |       |           |       |         |       |        |       | Total          |       |
|-------------------------------------------------------------------|------------------------------------|----------------------|-------|--------------|-------|---------|-------|-----------|-------|---------|-------|--------|-------|----------------|-------|
|                                                                   |                                    | Aubagio              |       | Injizierbare |       | Gilenya |       | Tecfidera |       | Tysabri |       | Andere |       | keine Therapie |       |
|                                                                   |                                    | N                    | col%  | N            | col%  | N       | col%  | N         | col%  | N       | col%  | N      | col%  | N              | col%  |
| Total                                                             |                                    | 8                    | 100%  | 39           | 100%  | 64      | 100%  | 20        | 100%  | 57      | 100%  | 3      | 100%  | 19             | 100%  |
| Zweitmeinung bei Diagnose:                                        | ja                                 |                      |       | 10           | 25.6% | 9       | 14.1% | 6         | 30.0% | 9       | 15.8% |        |       | 6              | 31.6% |
|                                                                   | nein                               | 7                    | 87.5% | 27           | 69.2% | 51      | 79.7% | 14        | 70.0% | 45      | 78.9% | 2      | 66.7% | 11             | 57.9% |
|                                                                   | Keine Angabe                       | 1                    | 12.5% | 2            | 5.1%  | 4       | 6.3%  |           |       | 3       | 5.3%  | 1      | 33.3% | 2              | 10.5% |
| Therapieentscheid bei Erstdiagnose:                               | Aubagio                            | 4                    | 50.0% |              |       |         |       |           |       |         |       |        |       |                |       |
|                                                                   | Injizierbare                       | 3                    | 37.5% | 37           | 94.9% | 41      | 64.1% | 15        | 75.0% | 39      | 68.4% | 2      | 66.7% | 13             | 68.4% |
|                                                                   | Gilenya                            |                      |       | 1            | 2.6%  | 18      | 28.1% |           |       | 2       | 3.5%  |        |       | 1              | 5.3%  |
|                                                                   | Tecfidera                          |                      |       |              |       | 4       | 6.3%  | 5         | 25.0% | 4       | 7.0%  |        |       | 1              | 5.3%  |
|                                                                   | Tysabri                            |                      |       |              |       |         |       |           |       | 10      | 17.5% |        |       |                |       |
|                                                                   | Andere                             |                      |       |              |       | 1       | 1.6%  |           |       |         |       |        |       | 2              | 10.5% |
| Rebif bei Erstdiagnose:                                           | Keine Angabe                       | 1                    | 12.5% | 1            | 2.6%  |         |       |           |       | 2       | 3.5%  | 1      | 33.3% | 2              | 10.5% |
|                                                                   | nein                               | 5                    | 62.5% | 27           | 69.2% | 47      | 73.4% | 14        | 70.0% | 44      | 77.2% | 2      | 66.7% | 11             | 57.9% |
|                                                                   | ja                                 | 3                    | 37.5% | 12           | 30.8% | 17      | 26.6% | 6         | 30.0% | 13      | 22.8% | 1      | 33.3% | 8              | 42.1% |
| 10. Mit welcher MS-Langzeittherapie werden Sie aktuell behandelt? |                                    | 8                    | 100%  |              |       |         |       |           |       |         |       |        |       |                |       |
|                                                                   | Aubagio                            |                      |       |              |       |         |       |           |       |         |       |        |       |                |       |
|                                                                   | Avonex                             |                      |       | 9            | 23.1% |         |       |           |       |         |       |        |       |                |       |
|                                                                   | Betaferon                          |                      |       | 3            | 7.7%  |         |       |           |       |         |       |        |       |                |       |
|                                                                   | Copaxone                           |                      |       | 11           | 28.2% |         |       |           |       |         |       |        |       |                |       |
|                                                                   | Gilenya                            |                      |       |              |       | 64      | 100%  |           |       |         |       |        |       |                |       |
|                                                                   | Plegridy                           |                      |       | 4            | 10.3% |         |       |           |       |         |       |        |       |                |       |
|                                                                   | Rebif                              |                      |       | 12           | 30.8% |         |       |           |       |         |       |        |       |                |       |
|                                                                   | Tecfidera                          |                      |       |              |       |         |       | 20        | 100%  |         |       |        |       |                |       |
|                                                                   | Tysabri                            |                      |       |              |       |         |       |           |       | 57      | 100%  |        |       |                |       |
|                                                                   | Andere                             |                      |       |              |       |         |       |           |       |         |       | 3      | 100%  |                |       |
| Rebif ist aktuelle Behandlung:                                    | Ich wende gerade keine Therapie an |                      |       |              |       |         |       |           |       |         |       |        |       | 19             | 100%  |
|                                                                   | nein                               | 8                    | 100%  | 27           | 69.2% | 64      | 100%  | 20        | 100%  | 57      | 100%  | 3      | 100%  | 19             | 100%  |
| Anzahl MS Langzeit-Therapien:                                     | ja                                 |                      |       | 12           | 30.8% |         |       |           |       |         |       |        |       |                |       |
|                                                                   | Erste MS Therapie                  | 4                    | 50.0% | 26           | 66.7% | 15      | 23.4% | 5         | 25.0% | 6       | 10.5% | 1      | 33.3% |                |       |
|                                                                   | Zweite MS Therapie                 | 2                    | 25.0% | 9            | 23.1% | 30      | 46.9% | 11        | 55.0% | 32      | 56.1% |        |       |                |       |
|                                                                   | Dritte oder mehr                   | 2                    | 25.0% | 4            | 10.3% | 18      | 28.1% | 4         | 20.0% | 17      | 29.8% | 2      | 66.7% |                |       |
|                                                                   | Keine Angabe                       |                      |       |              |       | 1       | 1.6%  |           |       | 2       | 3.5%  |        |       | 19             | 100%  |
| Rückblickend gleiche Therapie:                                    |                                    |                      |       |              |       |         |       |           |       |         |       |        |       |                |       |
|                                                                   | ja                                 | 5                    | 62.5% | 34           | 87.2% | 35      | 54.7% | 15        | 75.0% | 30      | 52.6% | 1      | 33.3% | 6              | 31.6% |
|                                                                   | nein                               |                      |       | 2            | 5.1%  | 21      | 32.8% | 5         | 25.0% | 18      | 31.6% | 1      | 33.3% | 9              | 47.4% |
|                                                                   | Keine Angabe                       | 3                    | 37.5% | 3            | 7.7%  | 8       | 12.5% |           |       | 9       | 15.8% | 1      | 33.3% | 4              | 21.1% |

**2.19 FRAGE 11: DAUER DER AKTUELLEN BEHANDLUNG NACH KEY VARIABLEN I**

|                                            |                                   | 11. Wie lange werden Sie mit Ihrer aktuellen Therapie bereits behandelt? |       |                 |       |               |       |               |       |                |       |                 |       |            |       | Total        |      |
|--------------------------------------------|-----------------------------------|--------------------------------------------------------------------------|-------|-----------------|-------|---------------|-------|---------------|-------|----------------|-------|-----------------|-------|------------|-------|--------------|------|
|                                            |                                   | <= 6 Monate                                                              |       | > 6 - 12 Monate |       | > 1 - 3 Jahre |       | > 3 - 5 Jahre |       | > 5 - 10 Jahre |       | > 10 - 15 Jahre |       | > 15 Jahre |       | Keine Angabe |      |
|                                            |                                   | N                                                                        | col%  | N               | col%  | N             | col%  | N             | col%  | N              | col%  | N               | col%  | N          | col%  | N            | col% |
| Total                                      |                                   | 19                                                                       | 100%  | 25              | 100%  | 51            | 100%  | 48            | 100%  | 31             | 100%  | 9               | 100%  | 7          | 100%  | 1            | 100% |
| Geschlecht:                                | Weiblich                          | 15                                                                       | 78.9% | 18              | 72.0% | 35            | 68.6% | 35            | 72.9% | 21             | 67.7% | 9               | 100%  | 6          | 85.7% | 1            | 100% |
|                                            | Männlich                          | 4                                                                        | 21.1% | 7               | 28.0% | 15            | 29.4% | 13            | 27.1% | 9              | 29.0% |                 |       | 1          | 14.3% |              |      |
|                                            | Keine Angabe                      |                                                                          |       |                 |       | 1             | 2.0%  |               |       | 1              | 3.2%  |                 |       |            |       |              |      |
|                                            |                                   |                                                                          |       |                 |       |               |       |               |       |                |       |                 |       |            |       | 2            | 1.0% |
| Altersgruppe:                              | bis 30 Jahre                      | 10                                                                       | 52.6% | 3               | 12.0% | 13            | 25.5% | 3             | 6.3%  | 2              | 6.5%  |                 |       |            |       |              |      |
|                                            | 31 - 40 Jahre                     | 6                                                                        | 31.6% | 6               | 24.0% | 13            | 25.5% | 12            | 25.0% | 13             | 41.9% |                 |       |            |       |              |      |
|                                            | 41 - 45 Jahre                     | 1                                                                        | 5.3%  | 7               | 28.0% | 10            | 19.6% | 10            | 20.8% | 4              | 12.9% | 2               | 22.2% |            |       | 1            | 100% |
|                                            | über 45 Jahre                     | 2                                                                        | 10.5% | 9               | 36.0% | 14            | 27.5% | 23            | 47.9% | 11             | 35.5% | 7               | 77.8% | 7          | 100%  |              |      |
|                                            | Keine Angabe                      |                                                                          |       |                 |       | 1             | 2.0%  |               |       | 1              | 3.2%  |                 |       |            |       |              |      |
| höchste<br>Berufsausbildung:               | Obligatorische Schule/Anlehre     |                                                                          |       | 3               | 12.0% | 5             | 9.8%  | 5             | 10.4% | 3              | 9.7%  | 1               | 11.1% |            |       |              |      |
|                                            | Berufslehre/ - schule             | 10                                                                       | 52.6% | 10              | 40.0% | 23            | 45.1% | 20            | 41.7% | 14             | 45.2% | 3               | 33.3% | 5          | 71.4% |              |      |
|                                            | Höhere Fach- und Berufsausbildung | 1                                                                        | 5.3%  | 7               | 28.0% | 15            | 29.4% | 18            | 37.5% | 10             | 32.3% | 4               | 44.4% | 1          | 14.3% |              |      |
|                                            | Universität / Fachhochschule      | 7                                                                        | 36.8% | 5               | 20.0% | 7             | 13.7% | 5             | 10.4% | 3              | 9.7%  | 1               | 11.1% | 1          | 14.3% | 1            | 100% |
|                                            | Keine Angabe                      | 1                                                                        | 5.3%  |                 |       | 1             | 2.0%  |               |       | 1              | 3.2%  |                 |       |            |       |              |      |
| Form der MS:                               | CIS                               | 2                                                                        | 10.5% | 1               | 4.0%  |               |       | 1             | 2.1%  |                |       |                 |       |            |       |              |      |
|                                            | RRMS                              | 17                                                                       | 89.5% | 24              | 96.0% | 48            | 94.1% | 45            | 93.8% | 28             | 90.3% | 8               | 88.9% | 6          | 85.7% | 1            | 100% |
|                                            | SPMS                              |                                                                          |       |                 |       | 2             | 3.9%  | 2             | 4.2%  | 3              | 9.7%  |                 |       | 1          | 14.3% |              |      |
|                                            | Keine Angabe                      |                                                                          |       |                 |       | 1             | 2.0%  |               |       |                |       | 1               | 11.1% |            |       |              |      |
| Dauer seit der<br>Diagnose:                | < 12 Monate                       | 6                                                                        | 31.6% | 5               | 20.0% |               |       | 1             | 2.1%  |                |       |                 |       |            |       |              |      |
|                                            | 1 - 3 Jahre                       | 6                                                                        | 31.6% | 3               | 12.0% | 20            | 39.2% |               |       |                |       |                 |       |            |       |              |      |
|                                            | 3 - 5 Jahre                       | 1                                                                        | 5.3%  | 2               | 8.0%  | 11            | 21.6% | 13            | 27.1% |                |       |                 |       |            |       |              |      |
|                                            | 5 - 10 Jahre                      | 2                                                                        | 10.5% | 6               | 24.0% | 7             | 13.7% | 10            | 20.8% | 17             | 54.8% |                 |       |            |       | 1            | 100% |
|                                            | 10 - 15 Jahre                     | 2                                                                        | 10.5% | 5               | 20.0% | 5             | 9.8%  | 11            | 22.9% | 5              | 16.1% | 4               | 44.4% |            |       |              |      |
|                                            | > 15 Jahre                        | 2                                                                        | 10.5% | 4               | 16.0% | 7             | 13.7% | 13            | 27.1% | 9              | 29.0% | 5               | 55.6% | 7          | 100%  |              |      |
|                                            | Keine Angabe                      |                                                                          |       |                 |       | 1             | 2.0%  |               |       |                |       |                 |       |            |       |              |      |
| Gespräch mit<br>Neurologe bei<br>Diagnose: | sehr gut/gut                      | 12                                                                       | 63.2% | 15              | 60.0% | 35            | 68.6% | 29            | 60.4% | 15             | 48.4% | 2               | 22.2% | 5          | 71.4% |              |      |
|                                            | mittel                            | 3                                                                        | 15.8% | 2               | 8.0%  | 7             | 13.7% | 4             | 8.3%  |                |       | 2               | 22.2% | 2          | 28.6% |              |      |
|                                            | schlecht/sehr schlecht            | 4                                                                        | 21.1% | 8               | 32.0% | 8             | 15.7% | 14            | 29.2% | 15             | 48.4% | 4               | 44.4% |            |       |              |      |
|                                            | Keine Angabe                      |                                                                          |       |                 |       | 1             | 2.0%  | 1             | 2.1%  | 1              | 3.2%  | 1               | 11.1% |            |       | 1            | 100% |

## 2.20 FRAGE 11: DAUER DER AKTUELLEN BEHANDLUNG NACH KEY VARIABLEN II

|                       |                    | 11. Wie lange werden Sie mit Ihrer aktuellen Therapie bereits behandelt? |       |                 |       |               |       |               |       |                |       |                 |       |            |       |              |      | Total |       |
|-----------------------|--------------------|--------------------------------------------------------------------------|-------|-----------------|-------|---------------|-------|---------------|-------|----------------|-------|-----------------|-------|------------|-------|--------------|------|-------|-------|
|                       |                    | <= 6 Monate                                                              |       | > 6 – 12 Monate |       | > 1 – 3 Jahre |       | > 3 – 5 Jahre |       | > 5 – 10 Jahre |       | > 10 – 15 Jahre |       | > 15 Jahre |       | Keine Angabe |      | N     | col%  |
|                       |                    | N                                                                        | col%  | N               | col%  | N             | col%  | N             | col%  | N              | col%  | N               | col%  | N          | col%  | N            | col% |       |       |
| Total                 |                    | 19                                                                       | 100%  | 25              | 100%  | 51            | 100%  | 48            | 100%  | 31             | 100%  | 9               | 100%  | 7          | 100%  | 1            | 100% | 191   | 100%  |
| Zweitmeinung bei      | ja                 | 4                                                                        | 21.1% | 4               | 16.0% | 7             | 13.7% | 7             | 14.6% | 6              | 19.4% | 3               | 33.3% | 3          | 42.9% |              |      | 34    | 17.8% |
| Diagnose:             | nein               | 13                                                                       | 68.4% | 21              | 84.0% | 42            | 82.4% | 36            | 75.0% | 25             | 80.6% | 5               | 55.6% | 3          | 42.9% | 1            | 100% | 146   | 76.4% |
|                       | Keine Angabe       | 2                                                                        | 10.5% |                 |       | 2             | 3.9%  | 5             | 10.4% |                |       | 1               | 11.1% | 1          | 14.3% |              |      | 11    | 5.8%  |
| Therapieentscheid bei | Aubagio            |                                                                          |       |                 |       | 3             | 5.9%  | 1             | 2.1%  |                |       |                 |       |            |       |              |      | 4     | 2.1%  |
| Erstdiagnose:         | Injizierbare       | 12                                                                       | 63.2% | 18              | 72.0% | 30            | 58.8% | 35            | 72.9% | 26             | 83.9% | 8               | 88.9% | 7          | 100%  | 1            | 100% | 137   | 71.7% |
|                       | Gilenya            | 1                                                                        | 5.3%  | 2               | 8.0%  | 10            | 19.6% | 5             | 10.4% | 2              | 6.5%  | 1               | 11.1% |            |       |              |      | 21    | 11.0% |
|                       | Tecfidera          | 3                                                                        | 15.8% | 5               | 20.0% | 5             | 9.8%  |               |       |                |       |                 |       |            |       |              |      | 13    | 6.8%  |
|                       | Tysabri            | 2                                                                        | 10.5% |                 |       | 1             | 2.0%  | 5             | 10.4% | 2              | 6.5%  |                 |       |            |       |              |      | 10    | 5.2%  |
|                       | Andere             | 1                                                                        | 5.3%  |                 |       |               |       |               |       |                |       |                 |       |            |       |              |      | 1     | 0.5%  |
|                       | Keine Angabe       |                                                                          |       |                 |       | 2             | 3.9%  | 2             | 4.2%  | 1              | 3.2%  |                 |       |            |       |              |      | 5     | 2.6%  |
| Rebif bei             | nein               | 15                                                                       | 78.9% | 16              | 64.0% | 40            | 78.4% | 37            | 77.1% | 22             | 71.0% | 8               | 88.9% | 1          | 14.3% |              |      | 139   | 72.8% |
| Erstdiagnose:         | ja                 | 4                                                                        | 21.1% | 9               | 36.0% | 11            | 21.6% | 11            | 22.9% | 9              | 29.0% | 1               | 11.1% | 6          | 85.7% | 1            | 100% | 52    | 27.2% |
| Aktuelle Behandlung:  | Aubagio            | 1                                                                        | 5.3%  |                 |       | 6             | 11.8% | 1             | 2.1%  |                |       |                 |       |            |       |              |      | 8     | 4.2%  |
|                       | Injizierbare       | 4                                                                        | 21.1% | 2               | 8.0%  | 8             | 15.7% | 5             | 10.4% | 6              | 19.4% | 8               | 88.9% | 6          | 85.7% |              |      | 39    | 20.4% |
|                       | Gilenya            | 4                                                                        | 21.1% | 9               | 36.0% | 21            | 41.2% | 23            | 47.9% | 5              | 16.1% | 1               | 11.1% |            |       | 1            | 100% | 64    | 33.5% |
|                       | Tecfidera          | 4                                                                        | 21.1% | 8               | 32.0% | 7             | 13.7% | 1             | 2.1%  |                |       |                 |       |            |       |              |      | 20    | 10.5% |
|                       | Tysabri            | 6                                                                        | 31.6% | 5               | 20.0% | 9             | 17.6% | 16            | 33.3% | 20             | 64.5% |                 |       | 1          | 14.3% |              |      | 57    | 29.8% |
|                       | Andere             |                                                                          |       | 1               | 4.0%  |               |       | 2             | 4.2%  |                |       |                 |       |            |       |              |      | 3     | 1.6%  |
| Rebif ist aktuelle    | nein               | 18                                                                       | 94.7% | 25              | 100%  | 50            | 98.0% | 46            | 95.8% | 30             | 96.8% | 7               | 77.8% | 2          | 28.6% | 1            | 100% | 179   | 93.7% |
| Behandlung:           | ja                 | 1                                                                        | 5.3%  |                 |       | 1             | 2.0%  | 2             | 4.2%  | 1              | 3.2%  | 2               | 22.2% | 5          | 71.4% |              |      | 12    | 6.3%  |
| Anzahl MS Langzeit-   | Erste MS Therapie  | 5                                                                        | 26.3% | 5               | 20.0% | 20            | 39.2% | 11            | 22.9% | 8              | 25.8% | 2               | 22.2% | 6          | 85.7% |              |      | 57    | 29.8% |
| Therapien:            | Zweite MS Therapie | 10                                                                       | 52.6% | 9               | 36.0% | 23            | 45.1% | 21            | 43.8% | 17             | 54.8% | 4               | 44.4% |            |       |              |      | 84    | 44.0% |
|                       | Dritte oder mehr   | 3                                                                        | 15.8% | 11              | 44.0% | 8             | 15.7% | 16            | 33.3% | 6              | 19.4% | 3               | 33.3% |            |       |              |      | 47    | 24.6% |
|                       | Keine Angabe       | 1                                                                        | 5.3%  |                 |       |               |       |               |       |                |       |                 |       | 1          | 14.3% | 1            | 100% | 3     | 1.6%  |
| Rückblickend gleiche  | ja                 | 7                                                                        | 36.8% | 14              | 56.0% | 35            | 68.6% | 30            | 62.5% | 20             | 64.5% | 9               | 100%  | 5          | 71.4% |              |      | 120   | 62.8% |
| Therapie:             | nein               | 11                                                                       | 57.9% | 8               | 32.0% | 10            | 19.6% | 11            | 22.9% | 6              | 19.4% |                 |       | 1          | 14.3% |              |      | 47    | 24.6% |
|                       | Keine Angabe       | 1                                                                        | 5.3%  | 3               | 12.0% | 6             | 11.8% | 7             | 14.6% | 5              | 16.1% |                 |       | 1          | 14.3% | 1            | 100% | 24    | 12.6% |

## 2.21 FRAGE 12: ANZAHL BISHERIGE MS-LANGZEITTHERAPIE NACH KEY VARIABLEN I

|                                            |                                   | Anzahl MS Langzeit-Therapien: |        |                    |        |                  |        |              |        | Total |        |
|--------------------------------------------|-----------------------------------|-------------------------------|--------|--------------------|--------|------------------|--------|--------------|--------|-------|--------|
|                                            |                                   | Erste MS Therapie             |        | Zweite MS Therapie |        | Dritte oder mehr |        | Keine Angabe |        | N     | col%   |
|                                            |                                   | N                             | col%   | N                  | col%   | N                | col%   | N            | col%   |       |        |
| Total                                      |                                   | 58                            | 100.0% | 84                 | 100.0% | 48               | 100.0% | 22           | 100.0% | 212   | 100.0% |
| Geschlecht:                                | Weiblich                          | 41                            | 70.7%  | 59                 | 70.2%  | 38               | 79.2%  | 17           | 77.3%  | 155   | 73.1%  |
|                                            | Männlich                          | 16                            | 27.6%  | 24                 | 28.6%  | 10               | 20.8%  | 5            | 22.7%  | 55    | 25.9%  |
|                                            | Keine Angabe                      | 1                             | 1.7%   | 1                  | 1.2%   |                  |        |              |        | 2     | 0.9%   |
|                                            |                                   |                               |        |                    |        |                  |        |              |        |       |        |
| Altersgruppe:                              | bis 30 Jahre                      | 14                            | 24.1%  | 12                 | 14.3%  | 5                | 10.4%  | 2            | 9.1%   | 33    | 15.6%  |
|                                            | 31 – 40 Jahre                     | 13                            | 22.4%  | 23                 | 27.4%  | 14               | 29.2%  | 6            | 27.3%  | 56    | 26.4%  |
|                                            | 41 – 45 Jahre                     | 6                             | 10.3%  | 17                 | 20.2%  | 10               | 20.8%  | 4            | 18.2%  | 37    | 17.5%  |
|                                            | über 45 Jahre                     | 24                            | 41.4%  | 31                 | 36.9%  | 19               | 39.6%  | 10           | 45.5%  | 84    | 39.6%  |
|                                            | Keine Angabe                      | 1                             | 1.7%   | 1                  | 1.2%   |                  |        |              |        | 2     | 0.9%   |
| höchste<br>Berufsausbildung:               | Obligatorische Schule/Anlehre     | 4                             | 6.9%   | 4                  | 4.8%   | 9                | 18.8%  |              |        | 17    | 8.0%   |
|                                            | Berufslehre/ - schule             | 21                            | 36.2%  | 37                 | 44.0%  | 26               | 54.2%  | 14           | 63.6%  | 98    | 46.2%  |
|                                            | Höhere Fach- und Berufsausbildung | 21                            | 36.2%  | 27                 | 32.1%  | 9                | 18.8%  | 3            | 13.6%  | 60    | 28.3%  |
|                                            | Universität / Fachhochschule      | 11                            | 19.0%  | 14                 | 16.7%  | 4                | 8.3%   | 5            | 22.7%  | 34    | 16.0%  |
|                                            | Keine Angabe                      | 1                             | 1.7%   | 2                  | 2.4%   |                  |        |              |        | 3     | 1.4%   |
| Form der MS:                               | CIS                               | 4                             | 6.9%   |                    |        |                  |        | 1            | 4.5%   | 5     | 2.4%   |
|                                            | RRMS                              | 50                            | 86.2%  | 79                 | 94.0%  | 46               | 95.8%  | 15           | 68.2%  | 190   | 89.6%  |
|                                            | SPMS                              | 4                             | 6.9%   | 4                  | 4.8%   | 1                | 2.1%   | 6            | 27.3%  | 15    | 7.1%   |
|                                            | Keine Angabe                      |                               |        | 1                  | 1.2%   | 1                | 2.1%   |              |        | 2     | 0.9%   |
| Dauer seit der<br>Diagnose:                | < 12 Monate                       | 10                            | 17.2%  | 1                  | 1.2%   | 1                | 2.1%   | 6            | 27.3%  | 18    | 8.5%   |
|                                            | 1 – 3 Jahre                       | 18                            | 31.0%  | 9                  | 10.7%  | 2                | 4.2%   |              |        | 29    | 13.7%  |
|                                            | 3 – 5 Jahre                       | 10                            | 17.2%  | 13                 | 15.5%  | 4                | 8.3%   | 1            | 4.5%   | 28    | 13.2%  |
|                                            | 5 – 10 Jahre                      | 9                             | 15.5%  | 20                 | 23.8%  | 13               | 27.1%  | 3            | 13.6%  | 45    | 21.2%  |
|                                            | 10 – 15 Jahre                     | 3                             | 5.2%   | 14                 | 16.7%  | 16               | 33.3%  | 2            | 9.1%   | 35    | 16.5%  |
|                                            | > 15 Jahre                        | 8                             | 13.8%  | 26                 | 31.0%  | 12               | 25.0%  | 10           | 45.5%  | 56    | 26.4%  |
|                                            | Keine Angabe                      |                               |        | 1                  | 1.2%   |                  |        |              |        | 1     | 0.5%   |
| Gespräch mit<br>Neurologe bei<br>Diagnose: | sehr gut/gut                      | 40                            | 69.0%  | 48                 | 57.1%  | 23               | 47.9%  | 7            | 31.8%  | 118   | 55.7%  |
|                                            | mittel                            | 5                             | 8.6%   | 11                 | 13.1%  | 4                | 8.3%   | 6            | 27.3%  | 26    | 12.3%  |
|                                            | schlecht/sehr schlecht            | 12                            | 20.7%  | 23                 | 27.4%  | 20               | 41.7%  | 8            | 36.4%  | 63    | 29.7%  |
|                                            | Keine Angabe                      | 1                             | 1.7%   | 2                  | 2.4%   | 1                | 2.1%   | 1            | 4.5%   | 5     | 2.4%   |

## 2.22 FRAGE 12: ANZAHL BISHERIGE MS-LANGZEITTHERAPIE NACH KEY VARIABLEN II

|                                                                                         |                             | Anzahl MS Langzeit-Therapien: |       |                    |       |                  |       |              |       | Total |       |
|-----------------------------------------------------------------------------------------|-----------------------------|-------------------------------|-------|--------------------|-------|------------------|-------|--------------|-------|-------|-------|
|                                                                                         |                             | Erste MS Therapie             |       | Zweite MS Therapie |       | Dritte oder mehr |       | Keine Angabe |       | N     | col%  |
|                                                                                         |                             | N                             | col%  | N                  | col%  | N                | col%  | N            | col%  |       |       |
| Total                                                                                   |                             | 58                            | 100%  | 84                 | 100%  | 48               | 100%  | 22           | 100%  | 212   | 100%  |
| Zweitmeinung bei Diagnose:                                                              | ja                          | 11                            | 19.0% | 16                 | 19.0% | 7                | 14.6% | 7            | 31.8% | 41    | 19.3% |
|                                                                                         | nein                        | 42                            | 72.4% | 66                 | 78.6% | 37               | 77.1% | 13           | 59.1% | 158   | 74.5% |
|                                                                                         | Keine Angabe                | 5                             | 8.6%  | 2                  | 2.4%  | 4                | 8.3%  | 2            | 9.1%  | 13    | 6.1%  |
|                                                                                         |                             |                               |       |                    |       |                  |       |              |       |       |       |
| Therapieentscheid bei Erstdiagnose:                                                     | Aubagio                     | 4                             | 6.9%  |                    |       |                  |       |              |       | 4     | 1.9%  |
|                                                                                         | Injizierbare                | 26                            | 44.8% | 68                 | 81.0% | 42               | 87.5% | 15           | 68.2% | 151   | 71.2% |
|                                                                                         | Gilenya                     | 14                            | 24.1% | 5                  | 6.0%  | 2                | 4.2%  | 1            | 4.5%  | 22    | 10.4% |
|                                                                                         | Tecfidera                   | 5                             | 8.6%  | 8                  | 9.5%  |                  |       | 1            | 4.5%  | 14    | 6.6%  |
|                                                                                         | Tysabri                     | 5                             | 8.6%  | 2                  | 2.4%  | 2                | 4.2%  | 1            | 4.5%  | 10    | 4.7%  |
|                                                                                         | Andere                      | 2                             | 3.4%  |                    |       |                  |       | 2            | 9.1%  | 4     | 1.9%  |
|                                                                                         | Keine Angabe                | 2                             | 3.4%  | 1                  | 1.2%  | 2                | 4.2%  | 2            | 9.1%  | 7     | 3.3%  |
| Rebif bei Erstdiagnose:                                                                 | nein                        | 49                            | 84.5% | 62                 | 73.8% | 29               | 60.4% | 12           | 54.5% | 152   | 71.7% |
|                                                                                         | ja                          | 9                             | 15.5% | 22                 | 26.2% | 19               | 39.6% | 10           | 45.5% | 60    | 28.3% |
| Aktuelle Behandlung:                                                                    | Aubagio                     | 4                             | 6.9%  | 2                  | 2.4%  | 2                | 4.2%  |              |       | 8     | 3.8%  |
|                                                                                         | Injizierbare                | 26                            | 44.8% | 9                  | 10.7% | 4                | 8.3%  |              |       | 39    | 18.4% |
|                                                                                         | Gilenya                     | 15                            | 25.9% | 30                 | 35.7% | 18               | 37.5% | 1            | 4.5%  | 64    | 30.2% |
|                                                                                         | Tecfidera                   | 5                             | 8.6%  | 11                 | 13.1% | 4                | 8.3%  |              |       | 20    | 9.4%  |
|                                                                                         | Tysabri                     | 6                             | 10.3% | 32                 | 38.1% | 17               | 35.4% | 2            | 9.1%  | 57    | 26.9% |
|                                                                                         | Andere                      | 1                             | 1.7%  |                    |       | 2                | 4.2%  |              |       | 3     | 1.4%  |
|                                                                                         | keine Therapie              |                               |       |                    |       |                  |       | 19           | 86.4% | 19    | 9.0%  |
|                                                                                         | Keine Angabe                | 1                             | 1.7%  |                    |       | 1                | 2.1%  |              |       | 2     | 0.9%  |
| Rebif ist aktuelle Behandlung:                                                          | nein                        | 49                            | 84.5% | 82                 | 97.6% | 47               | 97.9% | 22           | 100%  | 200   | 94.3% |
|                                                                                         | ja                          | 9                             | 15.5% | 2                  | 2.4%  | 1                | 2.1%  |              |       | 12    | 5.7%  |
| 12. Um die wievielte MS Langzeit-Therapie handelt es sich bei Ihrer aktuellen Therapie? | Erste MS Therapie           | 58                            | 100%  |                    |       |                  |       |              |       | 58    | 27.4% |
|                                                                                         | Zweite MS Therapie          |                               |       | 84                 | 100%  |                  |       |              |       | 84    | 39.6% |
|                                                                                         | Dritte MS Therapie          |                               |       |                    |       | 35               | 72.9% |              |       | 35    | 16.5% |
|                                                                                         | Mehr als dritte MS Therapie |                               |       |                    |       | 13               | 27.1% |              |       | 13    | 6.1%  |
|                                                                                         | Keine Angabe                |                               |       |                    |       |                  |       | 22           | 100%  | 22    | 10.4% |
| Rückblickend gleiche Therapie:                                                          | ja                          | 49                            | 84.5% | 49                 | 58.3% | 24               | 50.0% | 6            | 27.3% | 128   | 60.4% |
|                                                                                         | nein                        | 2                             | 3.4%  | 26                 | 31.0% | 18               | 37.5% | 10           | 45.5% | 56    | 26.4% |
|                                                                                         | Keine Angabe                | 7                             | 12.1% | 9                  | 10.7% | 6                | 12.5% | 6            | 27.3% | 28    | 13.2% |

### 3.1 FRAGE 13: WO WURDE DIE DIAGNOSE GESTELLT NACH KEY VARIABLEN I

|                                            |                                   | 13. Wo wurde Ihre Erst-Diagnose gestellt?        |        |                 |        |              |        | Total |        |
|--------------------------------------------|-----------------------------------|--------------------------------------------------|--------|-----------------|--------|--------------|--------|-------|--------|
|                                            |                                   | In einer privaten Praxis<br>(auch Gruppenpraxis) |        | In einem Spital |        | Keine Angabe |        | N     | col%   |
|                                            |                                   | N                                                | col%   | N               | col%   | N            | col%   |       |        |
| Total                                      |                                   | 72                                               | 100.0% | 138             | 100.0% | 2            | 100.0% | 212   | 100.0% |
| Geschlecht:                                | Weiblich                          | 51                                               | 70.8%  | 102             | 73.9%  | 2            | 100.0% | 155   | 73.1%  |
|                                            | Männlich                          | 20                                               | 27.8%  | 35              | 25.4%  |              |        | 55    | 25.9%  |
|                                            | Keine Angabe                      | 1                                                | 1.4%   | 1               | 0.7%   |              |        | 2     | 0.9%   |
|                                            |                                   |                                                  |        |                 |        |              |        |       |        |
| Altersgruppe:                              | bis 30 Jahre                      | 6                                                | 8.3%   | 27              | 19.6%  |              |        | 33    | 15.6%  |
|                                            | 31 – 40 Jahre                     | 21                                               | 29.2%  | 35              | 25.4%  |              |        | 56    | 26.4%  |
|                                            | 41 – 45 Jahre                     | 17                                               | 23.6%  | 19              | 13.8%  | 1            | 50.0%  | 37    | 17.5%  |
|                                            | über 45 Jahre                     | 27                                               | 37.5%  | 56              | 40.6%  | 1            | 50.0%  | 84    | 39.6%  |
|                                            | Keine Angabe                      | 1                                                | 1.4%   | 1               | 0.7%   |              |        | 2     | 0.9%   |
|                                            |                                   |                                                  |        |                 |        |              |        |       |        |
| höchste<br>Berufsausbildung:               | Obligatorische Schule/Anlehre     | 2                                                | 2.8%   | 14              | 10.1%  | 1            | 50.0%  | 17    | 8.0%   |
|                                            | Berufslehre/ - schule             | 34                                               | 47.2%  | 64              | 46.4%  |              |        | 98    | 46.2%  |
|                                            | Höhere Fach- und Berufsausbildung | 22                                               | 30.6%  | 38              | 27.5%  |              |        | 60    | 28.3%  |
|                                            | Universität / Fachhochschule      | 13                                               | 18.1%  | 20              | 14.5%  | 1            | 50.0%  | 34    | 16.0%  |
|                                            | Keine Angabe                      | 1                                                | 1.4%   | 2               | 1.4%   |              |        | 3     | 1.4%   |
| Form der MS:                               | CIS                               | 2                                                | 2.8%   | 3               | 2.2%   |              |        | 5     | 2.4%   |
|                                            | RRMS                              | 67                                               | 93.1%  | 121             | 87.7%  | 2            | 100.0% | 190   | 89.6%  |
|                                            | SPMS                              | 3                                                | 4.2%   | 12              | 8.7%   |              |        | 15    | 7.1%   |
|                                            | Keine Angabe                      |                                                  |        | 2               | 1.4%   |              |        | 2     | 0.9%   |
| Dauer seit der<br>Diagnose:                | < 12 Monate                       | 5                                                | 6.9%   | 13              | 9.4%   |              |        | 18    | 8.5%   |
|                                            | 1 – 3 Jahre                       | 8                                                | 11.1%  | 21              | 15.2%  |              |        | 29    | 13.7%  |
|                                            | 3 – 5 Jahre                       | 8                                                | 11.1%  | 20              | 14.5%  |              |        | 28    | 13.2%  |
|                                            | 5 – 10 Jahre                      | 20                                               | 27.8%  | 24              | 17.4%  | 1            | 50.0%  | 45    | 21.2%  |
|                                            | 10 – 15 Jahre                     | 11                                               | 15.3%  | 24              | 17.4%  |              |        | 35    | 16.5%  |
|                                            | > 15 Jahre                        | 20                                               | 27.8%  | 35              | 25.4%  | 1            | 50.0%  | 56    | 26.4%  |
|                                            | Keine Angabe                      |                                                  |        | 1               | 0.7%   |              |        | 1     | 0.5%   |
| Gespräch mit<br>Neurologe bei<br>Diagnose: | sehr gut/gut                      | 40                                               | 55.6%  | 78              | 56.5%  |              |        | 118   | 55.7%  |
|                                            | mittel                            | 10                                               | 13.9%  | 16              | 11.6%  |              |        | 26    | 12.3%  |
|                                            | schlecht/sehr schlecht            | 21                                               | 29.2%  | 42              | 30.4%  |              |        | 63    | 29.7%  |
|                                            | Keine Angabe                      | 1                                                | 1.4%   | 2               | 1.4%   | 2            | 100.0% | 5     | 2.4%   |

### 3.2 FRAGE 13: WO WURDE DIE DIAGNOSE GESTELLT NACH KEY VARIABLEN II

|                                        |                    | 13. Wo wurde Ihre Erst-Diagnose gestellt?        |        |                 |        |              |        | Total |        |
|----------------------------------------|--------------------|--------------------------------------------------|--------|-----------------|--------|--------------|--------|-------|--------|
|                                        |                    | In einer privaten Praxis<br>(auch Gruppenpraxis) |        | In einem Spital |        | Keine Angabe |        | N     | col%   |
|                                        |                    | N                                                | col%   | N               | col%   | N            | col%   |       |        |
| Total                                  |                    | 72                                               | 100.0% | 138             | 100.0% | 2            | 100.0% | 212   | 100.0% |
| Zweitmeinung bei<br>Diagnose:          | ja                 | 20                                               | 27.8%  | 21              | 15.2%  |              |        | 41    | 19.3%  |
|                                        | nein               | 46                                               | 63.9%  | 110             | 79.7%  | 2            | 100.0% | 158   | 74.5%  |
|                                        | Keine Angabe       | 6                                                | 8.3%   | 7               | 5.1%   |              |        | 13    | 6.1%   |
|                                        |                    |                                                  |        |                 |        |              |        |       |        |
| Therapieentscheid bei<br>Erstdiagnose: | Aubagio            | 1                                                | 1.4%   | 3               | 2.2%   |              |        | 4     | 1.9%   |
|                                        | Injizierbare       | 50                                               | 69.4%  | 99              | 71.7%  | 2            | 100.0% | 151   | 71.2%  |
|                                        | Gilenya            | 7                                                | 9.7%   | 15              | 10.9%  |              |        | 22    | 10.4%  |
|                                        | Tecfidera          | 4                                                | 5.6%   | 10              | 7.2%   |              |        | 14    | 6.6%   |
|                                        | Tysabri            | 6                                                | 8.3%   | 4               | 2.9%   |              |        | 10    | 4.7%   |
|                                        | Andere             |                                                  |        | 4               | 2.9%   |              |        | 4     | 1.9%   |
|                                        | Keine Angabe       | 4                                                | 5.6%   | 3               | 2.2%   |              |        | 7     | 3.3%   |
|                                        |                    |                                                  |        |                 |        |              |        |       |        |
| Rebif bei<br>Erstdiagnose:             | nein               | 52                                               | 72.2%  | 100             | 72.5%  |              |        | 152   | 71.7%  |
|                                        | ja                 | 20                                               | 27.8%  | 38              | 27.5%  | 2            | 100.0% | 60    | 28.3%  |
| Aktuelle Behandlung:                   | Aubagio            | 4                                                | 5.6%   | 4               | 2.9%   |              |        | 8     | 3.8%   |
|                                        | Injizierbare       | 11                                               | 15.3%  | 28              | 20.3%  |              |        | 39    | 18.4%  |
|                                        | Gilenya            | 20                                               | 27.8%  | 43              | 31.2%  | 1            | 50.0%  | 64    | 30.2%  |
|                                        | Tecfidera          | 5                                                | 6.9%   | 14              | 10.1%  | 1            | 50.0%  | 20    | 9.4%   |
|                                        | Tysabri            | 24                                               | 33.3%  | 33              | 23.9%  |              |        | 57    | 26.9%  |
|                                        | Andere             | 2                                                | 2.8%   | 1               | 0.7%   |              |        | 3     | 1.4%   |
|                                        | keine Therapie     | 6                                                | 8.3%   | 13              | 9.4%   |              |        | 19    | 9.0%   |
|                                        | Keine Angabe       |                                                  |        | 2               | 1.4%   |              |        | 2     | 0.9%   |
|                                        |                    |                                                  |        |                 |        |              |        |       |        |
| Rebif ist aktuelle<br>Behandlung:      | nein               | 69                                               | 95.8%  | 129             | 93.5%  | 2            | 100.0% | 200   | 94.3%  |
|                                        | ja                 | 3                                                | 4.2%   | 9               | 6.5%   |              |        | 12    | 5.7%   |
| Anzahl MS Langzeit-<br>Therapien:      | Erste MS Therapie  | 21                                               | 29.2%  | 37              | 26.8%  |              |        | 58    | 27.4%  |
|                                        | Zweite MS Therapie | 31                                               | 43.1%  | 52              | 37.7%  | 1            | 50.0%  | 84    | 39.6%  |
|                                        | Dritte oder mehr   | 14                                               | 19.4%  | 34              | 24.6%  |              |        | 48    | 22.6%  |
|                                        | Keine Angabe       | 6                                                | 8.3%   | 15              | 10.9%  | 1            | 50.0%  | 22    | 10.4%  |
| Rückblickend gleiche<br>Therapie:      | ja                 | 38                                               | 52.8%  | 90              | 65.2%  |              |        | 128   | 60.4%  |
|                                        | nein               | 20                                               | 27.8%  | 35              | 25.4%  | 1            | 50.0%  | 56    | 26.4%  |
|                                        | Keine Angabe       | 14                                               | 19.4%  | 13              | 9.4%   | 1            | 50.0%  | 28    | 13.2%  |

### 3.3 FRAGE 14: DIAGNOSESTELLUNG UND THERAPIEENTSCHEID NACH KEY VARIABLEN I

|                                      |                                   | 14. Wie fanden Diagnosestellung und Therapieentscheid statt? |        |                                                             |       |              |       | Total |        |
|--------------------------------------|-----------------------------------|--------------------------------------------------------------|--------|-------------------------------------------------------------|-------|--------------|-------|-------|--------|
|                                      |                                   | In einem Gespräch                                            |        | In mehreren Gesprächen (mehrere zeitlich getrennte Termine) |       | Keine Angabe |       | N     | col%   |
|                                      |                                   | N                                                            | row%   | N                                                           | row%  | N            | row%  |       |        |
| Total                                |                                   | 79                                                           | 37.3%  | 126                                                         | 59.4% | 7            | 3.3%  | 212   | 100.0% |
| Geschlecht:                          | Weiblich                          | 61                                                           | 39.4%  | 90                                                          | 58.1% | 4            | 2.6%  | 155   | 73.1%  |
|                                      | Männlich                          | 16                                                           | 29.1%  | 36                                                          | 65.5% | 3            | 5.5%  | 55    | 25.9%  |
|                                      | Keine Angabe                      | 2                                                            | 100.0% |                                                             |       |              |       | 2     | 0.9%   |
|                                      |                                   |                                                              |        |                                                             |       |              |       |       |        |
| Altersgruppe:                        | bis 30 Jahre                      | 11                                                           | 33.3%  | 22                                                          | 66.7% |              |       | 33    | 15.6%  |
|                                      | 31 – 40 Jahre                     | 19                                                           | 33.9%  | 35                                                          | 62.5% | 2            | 3.6%  | 56    | 26.4%  |
|                                      | 41 – 45 Jahre                     | 17                                                           | 45.9%  | 18                                                          | 48.6% | 2            | 5.4%  | 37    | 17.5%  |
|                                      | über 45 Jahre                     | 30                                                           | 35.7%  | 51                                                          | 60.7% | 3            | 3.6%  | 84    | 39.6%  |
|                                      | Keine Angabe                      | 2                                                            | 100.0% |                                                             |       |              |       | 2     | 0.9%   |
|                                      |                                   |                                                              |        |                                                             |       |              |       |       |        |
| höchste Berufsausbildung:            | Obligatorische Schule/Anlehre     | 8                                                            | 47.1%  | 8                                                           | 47.1% | 1            | 5.9%  | 17    | 8.0%   |
|                                      | Berufslehre/ - schule             | 40                                                           | 40.8%  | 54                                                          | 55.1% | 4            | 4.1%  | 98    | 46.2%  |
|                                      | Höhere Fach- und Berufsausbildung | 18                                                           | 30.0%  | 41                                                          | 68.3% | 1            | 1.7%  | 60    | 28.3%  |
|                                      | Universität / Fachhochschule      | 11                                                           | 32.4%  | 22                                                          | 64.7% | 1            | 2.9%  | 34    | 16.0%  |
|                                      | Keine Angabe                      | 2                                                            | 66.7%  | 1                                                           | 33.3% |              |       | 3     | 1.4%   |
| Form der MS:                         | CIS                               | 2                                                            | 40.0%  | 3                                                           | 60.0% |              |       | 5     | 2.4%   |
|                                      | RRMS                              | 73                                                           | 38.4%  | 111                                                         | 58.4% | 6            | 3.2%  | 190   | 89.6%  |
|                                      | SPMS                              | 3                                                            | 20.0%  | 11                                                          | 73.3% | 1            | 6.7%  | 15    | 7.1%   |
|                                      | Keine Angabe                      | 1                                                            | 50.0%  | 1                                                           | 50.0% |              |       | 2     | 0.9%   |
| Dauer seit der Diagnose:             | < 12 Monate                       | 8                                                            | 44.4%  | 10                                                          | 55.6% |              |       | 18    | 8.5%   |
|                                      | 1 – 3 Jahre                       | 4                                                            | 13.8%  | 25                                                          | 86.2% |              |       | 29    | 13.7%  |
|                                      | 3 – 5 Jahre                       | 14                                                           | 50.0%  | 12                                                          | 42.9% | 2            | 7.1%  | 28    | 13.2%  |
|                                      | 5 – 10 Jahre                      | 18                                                           | 40.0%  | 26                                                          | 57.8% | 1            | 2.2%  | 45    | 21.2%  |
|                                      | 10 – 15 Jahre                     | 12                                                           | 34.3%  | 21                                                          | 60.0% | 2            | 5.7%  | 35    | 16.5%  |
|                                      | > 15 Jahre                        | 22                                                           | 39.3%  | 32                                                          | 57.1% | 2            | 3.6%  | 56    | 26.4%  |
|                                      | Keine Angabe                      | 1                                                            | 100.0% |                                                             |       |              |       | 1     | 0.5%   |
|                                      |                                   |                                                              |        |                                                             |       |              |       |       |        |
| Gespräch mit Neurologe bei Diagnose: | sehr gut/gut                      | 39                                                           | 33.1%  | 75                                                          | 63.6% | 4            | 3.4%  | 118   | 55.7%  |
|                                      | mittel                            | 7                                                            | 26.9%  | 18                                                          | 69.2% | 1            | 3.8%  | 26    | 12.3%  |
|                                      | schlecht/sehr schlecht            | 32                                                           | 50.8%  | 30                                                          | 47.6% | 1            | 1.6%  | 63    | 29.7%  |
|                                      | Keine Angabe                      | 1                                                            | 20.0%  | 3                                                           | 60.0% | 1            | 20.0% | 5     | 2.4%   |

### 3.4 FRAGE 14: DIAGNOSESTELLUNG UND THERAPIEENTSCHEID NACH KEY VARIABLEN II

|                                     |                    | 14. Wie fanden Diagnosestellung und Therapieentscheid statt? |       |                                                             |       |              |       | Total |        |
|-------------------------------------|--------------------|--------------------------------------------------------------|-------|-------------------------------------------------------------|-------|--------------|-------|-------|--------|
|                                     |                    | In einem Gespräch                                            |       | In mehreren Gesprächen (mehrere zeitlich getrennte Termine) |       | Keine Angabe |       | N     | col%   |
|                                     |                    | N                                                            | row%  | N                                                           | row%  | N            | row%  |       |        |
| Total                               |                    | 79                                                           | 37.3% | 126                                                         | 59.4% | 7            | 3.3%  | 212   | 100.0% |
| Zweitmeinung bei Diagnose:          | ja                 | 9                                                            | 22.0% | 32                                                          | 78.0% |              |       | 41    | 19.3%  |
|                                     | nein               | 66                                                           | 41.8% | 89                                                          | 56.3% | 3            | 1.9%  | 158   | 74.5%  |
|                                     | Keine Angabe       | 4                                                            | 30.8% | 5                                                           | 38.5% | 4            | 30.8% | 13    | 6.1%   |
| Therapieentscheid bei Erstdiagnose: | Aubagio            | 1                                                            | 25.0% | 3                                                           | 75.0% |              |       | 4     | 1.9%   |
|                                     | Injizierbare       | 61                                                           | 40.4% | 85                                                          | 56.3% | 5            | 3.3%  | 151   | 71.2%  |
|                                     | Gilenya            | 4                                                            | 18.2% | 16                                                          | 72.7% | 2            | 9.1%  | 22    | 10.4%  |
|                                     | Tecfidera          | 3                                                            | 21.4% | 11                                                          | 78.6% |              |       | 14    | 6.6%   |
|                                     | Tysabri            | 7                                                            | 70.0% | 3                                                           | 30.0% |              |       | 10    | 4.7%   |
|                                     | Andere             | 1                                                            | 25.0% | 3                                                           | 75.0% |              |       | 4     | 1.9%   |
|                                     | Keine Angabe       | 2                                                            | 28.6% | 5                                                           | 71.4% |              |       | 7     | 3.3%   |
| Rebif bei Erstdiagnose:             | nein               | 53                                                           | 34.9% | 95                                                          | 62.5% | 4            | 2.6%  | 152   | 71.7%  |
|                                     | ja                 | 26                                                           | 43.3% | 31                                                          | 51.7% | 3            | 5.0%  | 60    | 28.3%  |
| Aktuelle Behandlung:                | Aubagio            | 3                                                            | 37.5% | 5                                                           | 62.5% |              |       | 8     | 3.8%   |
|                                     | Injizierbare       | 13                                                           | 33.3% | 25                                                          | 64.1% | 1            | 2.6%  | 39    | 18.4%  |
|                                     | Gilenya            | 20                                                           | 31.3% | 39                                                          | 60.9% | 5            | 7.8%  | 64    | 30.2%  |
|                                     | Tecfidera          | 8                                                            | 40.0% | 12                                                          | 60.0% |              |       | 20    | 9.4%   |
|                                     | Tysabri            | 29                                                           | 50.9% | 28                                                          | 49.1% |              |       | 57    | 26.9%  |
|                                     | Andere             | 1                                                            | 33.3% | 2                                                           | 66.7% |              |       | 3     | 1.4%   |
|                                     | keine Therapie     | 4                                                            | 21.1% | 14                                                          | 73.7% | 1            | 5.3%  | 19    | 9.0%   |
|                                     | Keine Angabe       | 1                                                            | 50.0% | 1                                                           | 50.0% |              |       | 2     | 0.9%   |
| Rebif ist aktuelle Behandlung:      | nein               | 72                                                           | 36.0% | 122                                                         | 61.0% | 6            | 3.0%  | 200   | 94.3%  |
|                                     | ja                 | 7                                                            | 58.3% | 4                                                           | 33.3% | 1            | 8.3%  | 12    | 5.7%   |
| Anzahl MS Langzeit-Therapien:       | Erste MS Therapie  | 23                                                           | 39.7% | 34                                                          | 58.6% | 1            | 1.7%  | 58    | 27.4%  |
|                                     | Zweite MS Therapie | 34                                                           | 40.5% | 48                                                          | 57.1% | 2            | 2.4%  | 84    | 39.6%  |
|                                     | Dritte oder mehr   | 16                                                           | 33.3% | 30                                                          | 62.5% | 2            | 4.2%  | 48    | 22.6%  |
|                                     | Keine Angabe       | 6                                                            | 27.3% | 14                                                          | 63.6% | 2            | 9.1%  | 22    | 10.4%  |
| Rückblickend gleiche Therapie:      | ja                 | 51                                                           | 39.8% | 74                                                          | 57.8% | 3            | 2.3%  | 128   | 60.4%  |
|                                     | nein               | 19                                                           | 33.9% | 36                                                          | 64.3% | 1            | 1.8%  | 56    | 26.4%  |
|                                     | Keine Angabe       | 9                                                            | 32.1% | 16                                                          | 57.1% | 3            | 10.7% | 28    | 13.2%  |

### 3.5 FRAGE 15: GESPRÄCH MIT NEUROLOGE BEI DIAGNOSE NACH KEY VARIABLEN I

| 1 = sehr gut - 5 = sehr schlecht           |                                   | 15. <b>Wie beurteilen Sie rückblickend das Gespräch mit Ihrem Neurologen, der Ihnen die Diagnose erklärt hat?</b> |       |    |       |    |        |    |        |    |       | Total |        |
|--------------------------------------------|-----------------------------------|-------------------------------------------------------------------------------------------------------------------|-------|----|-------|----|--------|----|--------|----|-------|-------|--------|
|                                            |                                   | 1                                                                                                                 |       | 2  |       | 3  |        | 4  |        | 5  |       | N     | col%   |
|                                            |                                   | N                                                                                                                 | row%  | N  | row%  | N  | row%   | N  | row%   | N  | row%  |       |        |
| Total                                      |                                   | 75                                                                                                                | 36.2% | 43 | 20.8% | 26 | 12.6%  | 32 | 15.5%  | 31 | 15.0% | 207   | 100.0% |
| Geschlecht:                                | Weiblich                          | 50                                                                                                                | 33.3% | 33 | 22.0% | 19 | 12.7%  | 21 | 14.0%  | 27 | 18.0% | 150   | 72.5%  |
|                                            | Männlich                          | 24                                                                                                                | 43.6% | 10 | 18.2% | 7  | 12.7%  | 10 | 18.2%  | 4  | 7.3%  | 55    | 26.6%  |
|                                            | Keine Angabe                      | 1                                                                                                                 | 50.0% |    |       |    |        | 1  | 50.0%  |    |       | 2     | 1.0%   |
|                                            |                                   |                                                                                                                   |       |    |       |    |        |    |        |    |       |       |        |
| Altersgruppe:                              | bis 30 Jahre                      | 10                                                                                                                | 30.3% | 10 | 30.3% | 5  | 15.2%  | 4  | 12.1%  | 4  | 12.1% | 33    | 15.9%  |
|                                            | 31 – 40 Jahre                     | 25                                                                                                                | 45.5% | 10 | 18.2% | 4  | 7.3%   | 7  | 12.7%  | 9  | 16.4% | 55    | 26.6%  |
|                                            | 41 – 45 Jahre                     | 12                                                                                                                | 35.3% | 6  | 17.6% | 4  | 11.8%  | 4  | 11.8%  | 8  | 23.5% | 34    | 16.4%  |
|                                            | über 45 Jahre                     | 27                                                                                                                | 32.5% | 17 | 20.5% | 13 | 15.7%  | 16 | 19.3%  | 10 | 12.0% | 83    | 40.1%  |
|                                            | Keine Angabe                      | 1                                                                                                                 | 50.0% |    |       |    |        | 1  | 50.0%  |    |       | 2     | 1.0%   |
| höchste<br>Berufsausbildung:               | Obligatorische Schule/Anlehre     | 5                                                                                                                 | 33.3% | 6  | 40.0% | 2  | 13.3%  | 1  | 6.7%   | 1  | 6.7%  | 15    | 7.2%   |
|                                            | Berufslehre/ - schule             | 35                                                                                                                | 36.1% | 18 | 18.6% | 10 | 10.3%  | 18 | 18.6%  | 16 | 16.5% | 97    | 46.9%  |
|                                            | Höhere Fach- und Berufsausbildung | 21                                                                                                                | 35.6% | 10 | 16.9% | 9  | 15.3%  | 8  | 13.6%  | 11 | 18.6% | 59    | 28.5%  |
|                                            | Universität / Fachhochschule      | 12                                                                                                                | 36.4% | 9  | 27.3% | 5  | 15.2%  | 4  | 12.1%  | 3  | 9.1%  | 33    | 15.9%  |
|                                            | Keine Angabe                      | 2                                                                                                                 | 66.7% |    |       |    |        | 1  | 33.3%  |    |       | 3     | 1.4%   |
| Form der MS:                               | CIS                               | 2                                                                                                                 | 40.0% | 1  | 20.0% |    |        | 2  | 40.0%  |    |       | 5     | 2.4%   |
|                                            | RRMS                              | 68                                                                                                                | 36.8% | 40 | 21.6% | 21 | 11.4%  | 27 | 14.6%  | 29 | 15.7% | 185   | 89.4%  |
|                                            | SPMS                              | 5                                                                                                                 | 33.3% | 2  | 13.3% | 4  | 26.7%  | 2  | 13.3%  | 2  | 13.3% | 15    | 7.2%   |
|                                            | Keine Angabe                      |                                                                                                                   |       |    |       | 1  | 50.0%  | 1  | 50.0%  |    |       | 2     | 1.0%   |
| Dauer seit der<br>Diagnose:                | < 12 Monate                       | 7                                                                                                                 | 38.9% | 4  | 22.2% | 1  | 5.6%   | 3  | 16.7%  | 3  | 16.7% | 18    | 8.7%   |
|                                            | 1 – 3 Jahre                       | 14                                                                                                                | 48.3% | 10 | 34.5% | 3  | 10.3%  | 2  | 6.9%   |    |       | 29    | 14.0%  |
|                                            | 3 – 5 Jahre                       | 12                                                                                                                | 42.9% | 8  | 28.6% | 1  | 3.6%   | 3  | 10.7%  | 4  | 14.3% | 28    | 13.5%  |
|                                            | 5 – 10 Jahre                      | 18                                                                                                                | 41.9% | 8  | 18.6% | 3  | 7.0%   | 6  | 14.0%  | 8  | 18.6% | 43    | 20.8%  |
|                                            | 10 – 15 Jahre                     | 11                                                                                                                | 33.3% | 2  | 6.1%  | 8  | 24.2%  | 8  | 24.2%  | 4  | 12.1% | 33    | 15.9%  |
|                                            | > 15 Jahre                        | 13                                                                                                                | 23.6% | 11 | 20.0% | 10 | 18.2%  | 9  | 16.4%  | 12 | 21.8% | 55    | 26.6%  |
|                                            | Keine Angabe                      |                                                                                                                   |       |    |       |    |        | 1  | 100.0% |    |       | 1     | 0.5%   |
| Gespräch mit<br>Neurologe bei<br>Diagnose: | sehr gut/gut                      | 75                                                                                                                | 63.6% | 43 | 36.4% |    |        |    |        |    |       | 118   | 57.0%  |
|                                            | mittel                            |                                                                                                                   |       |    |       | 26 | 100.0% |    |        |    |       | 26    | 12.6%  |
|                                            | schlecht/sehr schlecht            |                                                                                                                   |       |    |       |    |        | 32 | 50.8%  | 31 | 49.2% | 63    | 30.4%  |

### 3.6 FRAGE 15: GESPRÄCH MIT NEUROLOGE BEI DIAGNOSE NACH KEY VARIABLEN II

| 1 = sehr gut - 5 = sehr schlecht |                    | 15. Wie beurteilen Sie rückblickend das Gespräch mit Ihrem Neurologen, der Ihnen die Diagnose erklärt hat? |       |    |       |    |       |    |       |    |       | Total |        |
|----------------------------------|--------------------|------------------------------------------------------------------------------------------------------------|-------|----|-------|----|-------|----|-------|----|-------|-------|--------|
|                                  |                    | 1                                                                                                          |       | 2  |       | 3  |       | 4  |       | 5  |       | N     | col%   |
|                                  |                    | N                                                                                                          | row%  | N  | row%  | N  | row%  | N  | row%  | N  | row%  |       |        |
| Total                            |                    | 75                                                                                                         | 36.2% | 43 | 20.8% | 26 | 12.6% | 32 | 15.5% | 31 | 15.0% | 207   | 100.0% |
| Zweitmeinung bei                 | ja                 | 10                                                                                                         | 25.0% | 8  | 20.0% | 7  | 17.5% | 6  | 15.0% | 9  | 22.5% | 40    | 19.3%  |
| Diagnose:                        | nein               | 59                                                                                                         | 38.1% | 35 | 22.6% | 18 | 11.6% | 25 | 16.1% | 18 | 11.6% | 155   | 74.9%  |
|                                  | Keine Angabe       | 6                                                                                                          | 50.0% |    |       | 1  | 8.3%  | 1  | 8.3%  | 4  | 33.3% | 12    | 5.8%   |
| Therapieentscheid bei            | Aubagio            | 3                                                                                                          | 75.0% | 1  | 25.0% |    |       |    |       |    |       | 4     | 1.9%   |
| Erstdiagnose:                    | Injizierbare       | 47                                                                                                         | 32.0% | 26 | 17.7% | 22 | 15.0% | 29 | 19.7% | 23 | 15.6% | 147   | 71.0%  |
|                                  | Gilenya            | 11                                                                                                         | 50.0% | 7  | 31.8% | 1  | 4.5%  | 1  | 4.5%  | 2  | 9.1%  | 22    | 10.6%  |
|                                  | Tecfidera          | 5                                                                                                          | 35.7% | 4  | 28.6% | 3  | 21.4% | 1  | 7.1%  | 1  | 7.1%  | 14    | 6.8%   |
|                                  | Tysabri            | 6                                                                                                          | 66.7% | 2  | 22.2% |    |       |    |       | 1  | 11.1% | 9     | 4.3%   |
|                                  | Andere             |                                                                                                            |       | 2  | 50.0% |    |       | 1  | 25.0% | 1  | 25.0% | 4     | 1.9%   |
|                                  | Keine Angabe       | 3                                                                                                          | 42.9% | 1  | 14.3% |    |       |    |       | 3  | 42.9% | 7     | 3.4%   |
| Rebif bei                        | nein               | 55                                                                                                         | 36.9% | 33 | 22.1% | 15 | 10.1% | 25 | 16.8% | 21 | 14.1% | 149   | 72.0%  |
| Erstdiagnose:                    | ja                 | 20                                                                                                         | 34.5% | 10 | 17.2% | 11 | 19.0% | 7  | 12.1% | 10 | 17.2% | 58    | 28.0%  |
| Aktuelle Behandlung:             | Aubagio            | 5                                                                                                          | 62.5% | 2  | 25.0% | 1  | 12.5% |    |       |    |       | 8     | 3.9%   |
|                                  | Injizierbare       | 12                                                                                                         | 31.6% | 9  | 23.7% | 5  | 13.2% | 8  | 21.1% | 4  | 10.5% | 38    | 18.4%  |
|                                  | Gilenya            | 23                                                                                                         | 36.5% | 18 | 28.6% | 8  | 12.7% | 7  | 11.1% | 7  | 11.1% | 63    | 30.4%  |
|                                  | Tecfidera          | 10                                                                                                         | 52.6% | 3  | 15.8% | 2  | 10.5% | 2  | 10.5% | 2  | 10.5% | 19    | 9.2%   |
|                                  | Tysabri            | 21                                                                                                         | 38.2% | 9  | 16.4% | 4  | 7.3%  | 10 | 18.2% | 11 | 20.0% | 55    | 26.6%  |
|                                  | Andere             | 1                                                                                                          | 33.3% |    |       |    |       | 1  | 33.3% | 1  | 33.3% | 3     | 1.4%   |
|                                  | keine Therapie     | 3                                                                                                          | 15.8% | 2  | 10.5% | 6  | 31.6% | 3  | 15.8% | 5  | 26.3% | 19    | 9.2%   |
|                                  | Keine Angabe       |                                                                                                            |       |    |       |    |       | 1  | 50.0% | 1  | 50.0% | 2     | 1.0%   |
| Rebif ist aktuelle               | nein               | 71                                                                                                         | 36.4% | 40 | 20.5% | 24 | 12.3% | 32 | 16.4% | 28 | 14.4% | 195   | 94.2%  |
| Behandlung:                      | ja                 | 4                                                                                                          | 33.3% | 3  | 25.0% | 2  | 16.7% |    |       | 3  | 25.0% | 12    | 5.8%   |
| Anzahl MS Langzeit-              | Erste MS Therapie  | 25                                                                                                         | 43.9% | 15 | 26.3% | 5  | 8.8%  | 7  | 12.3% | 5  | 8.8%  | 57    | 27.5%  |
| Therapien:                       | Zweite MS Therapie | 33                                                                                                         | 40.2% | 15 | 18.3% | 11 | 13.4% | 13 | 15.9% | 10 | 12.2% | 82    | 39.6%  |
|                                  | Dritte oder mehr   | 12                                                                                                         | 25.5% | 11 | 23.4% | 4  | 8.5%  | 9  | 19.1% | 11 | 23.4% | 47    | 22.7%  |
|                                  | Keine Angabe       | 5                                                                                                          | 23.8% | 2  | 9.5%  | 6  | 28.6% | 3  | 14.3% | 5  | 23.8% | 21    | 10.1%  |
| Rückblickend gleiche             | ja                 | 52                                                                                                         | 41.3% | 28 | 22.2% | 15 | 11.9% | 18 | 14.3% | 13 | 10.3% | 126   | 60.9%  |
| Therapie:                        | nein               | 13                                                                                                         | 23.6% | 11 | 20.0% | 11 | 20.0% | 8  | 14.5% | 12 | 21.8% | 55    | 26.6%  |
|                                  | Keine Angabe       | 10                                                                                                         | 38.5% | 4  | 15.4% |    |       | 6  | 23.1% | 6  | 23.1% | 26    | 12.6%  |

### 3.7 FRAGE 16: INFORMATION ÜBER DIE VERSCHIEDENEN THERAPIEOPTIONEN NACH KEY VARIABLES I

| 1 = sehr gut - 5 = sehr schlecht           |                                   | 16. Information über die verschiedenen Therapieoptionen |       |    |       |    |       |    |        |    |       | Total |        |
|--------------------------------------------|-----------------------------------|---------------------------------------------------------|-------|----|-------|----|-------|----|--------|----|-------|-------|--------|
|                                            |                                   | 1                                                       |       | 2  |       | 3  |       | 4  |        | 5  |       | N     | col%   |
|                                            |                                   | N                                                       | row%  | N  | row%  | N  | row%  | N  | row%   | N  | row%  |       |        |
| Total                                      |                                   | 70                                                      | 34.5% | 50 | 24.6% | 32 | 15.8% | 34 | 16.7%  | 17 | 8.4%  | 203   | 100.0% |
| Geschlecht:                                | Weiblich                          | 50                                                      | 34.0% | 39 | 26.5% | 22 | 15.0% | 22 | 15.0%  | 14 | 9.5%  | 147   | 72.4%  |
|                                            | Männlich                          | 19                                                      | 35.2% | 11 | 20.4% | 10 | 18.5% | 11 | 20.4%  | 3  | 5.6%  | 54    | 26.6%  |
|                                            | Keine Angabe                      | 1                                                       | 50.0% |    |       |    |       | 1  | 50.0%  |    |       | 2     | 1.0%   |
|                                            |                                   |                                                         |       |    |       |    |       |    |        |    |       |       |        |
| Altersgruppe:                              | bis 30 Jahre                      | 5                                                       | 15.2% | 12 | 36.4% | 8  | 24.2% | 5  | 15.2%  | 3  | 9.1%  | 33    | 16.3%  |
|                                            | 31 – 40 Jahre                     | 22                                                      | 40.0% | 12 | 21.8% | 6  | 10.9% | 10 | 18.2%  | 5  | 9.1%  | 55    | 27.1%  |
|                                            | 41 – 45 Jahre                     | 11                                                      | 35.5% | 6  | 19.4% | 8  | 25.8% | 2  | 6.5%   | 4  | 12.9% | 31    | 15.3%  |
|                                            | über 45 Jahre                     | 31                                                      | 37.8% | 20 | 24.4% | 10 | 12.2% | 16 | 19.5%  | 5  | 6.1%  | 82    | 40.4%  |
|                                            | Keine Angabe                      | 1                                                       | 50.0% |    |       |    |       | 1  | 50.0%  |    |       | 2     | 1.0%   |
| höchste<br>Berufsausbildung:               | Obligatorische Schule/Anlehre     | 7                                                       | 53.8% | 2  | 15.4% | 1  | 7.7%  | 3  | 23.1%  |    |       | 13    | 6.4%   |
|                                            | Berufslehre/ - schule             | 28                                                      | 29.5% | 24 | 25.3% | 19 | 20.0% | 15 | 15.8%  | 9  | 9.5%  | 95    | 46.8%  |
|                                            | Höhere Fach- und Berufsausbildung | 24                                                      | 40.7% | 15 | 25.4% | 6  | 10.2% | 8  | 13.6%  | 6  | 10.2% | 59    | 29.1%  |
|                                            | Universität / Fachhochschule      | 10                                                      | 30.3% | 9  | 27.3% | 6  | 18.2% | 6  | 18.2%  | 2  | 6.1%  | 33    | 16.3%  |
|                                            | Keine Angabe                      | 1                                                       | 33.3% |    |       |    |       | 2  | 66.7%  |    |       | 3     | 1.5%   |
| Form der MS:                               | CIS                               | 1                                                       | 20.0% | 2  | 40.0% |    |       | 2  | 40.0%  |    |       | 5     | 2.5%   |
|                                            | RRMS                              | 64                                                      | 35.0% | 46 | 25.1% | 26 | 14.2% | 30 | 16.4%  | 17 | 9.3%  | 183   | 90.1%  |
|                                            | SPMS                              | 5                                                       | 35.7% | 2  | 14.3% | 6  | 42.9% | 1  | 7.1%   |    |       | 14    | 6.9%   |
|                                            | Keine Angabe                      |                                                         |       |    |       |    |       | 1  | 100.0% |    |       | 1     | 0.5%   |
| Dauer seit der<br>Diagnose:                | < 12 Monate                       | 7                                                       | 38.9% | 4  | 22.2% | 2  | 11.1% | 2  | 11.1%  | 3  | 16.7% | 18    | 8.9%   |
|                                            | 1 – 3 Jahre                       | 12                                                      | 41.4% | 10 | 34.5% | 4  | 13.8% | 3  | 10.3%  |    |       | 29    | 14.3%  |
|                                            | 3 – 5 Jahre                       | 8                                                       | 29.6% | 9  | 33.3% | 5  | 18.5% | 2  | 7.4%   | 3  | 11.1% | 27    | 13.3%  |
|                                            | 5 – 10 Jahre                      | 14                                                      | 33.3% | 11 | 26.2% | 5  | 11.9% | 10 | 23.8%  | 2  | 4.8%  | 42    | 20.7%  |
|                                            | 10 – 15 Jahre                     | 9                                                       | 28.1% | 5  | 15.6% | 8  | 25.0% | 7  | 21.9%  | 3  | 9.4%  | 32    | 15.8%  |
|                                            | > 15 Jahre                        | 20                                                      | 37.0% | 11 | 20.4% | 8  | 14.8% | 9  | 16.7%  | 6  | 11.1% | 54    | 26.6%  |
|                                            | Keine Angabe                      |                                                         |       |    |       |    |       | 1  | 100.0% |    |       | 1     | 0.5%   |
| Gespräch mit<br>Neurologe bei<br>Diagnose: | sehr gut/gut                      | 60                                                      | 51.3% | 40 | 34.2% | 12 | 10.3% | 4  | 3.4%   | 1  | 0.9%  | 117   | 57.6%  |
|                                            | mittel                            | 4                                                       | 16.7% | 5  | 20.8% | 9  | 37.5% | 5  | 20.8%  | 1  | 4.2%  | 24    | 11.8%  |
|                                            | schlecht/sehr schlecht            | 6                                                       | 9.7%  | 5  | 8.1%  | 11 | 17.7% | 25 | 40.3%  | 15 | 24.2% | 62    | 30.5%  |

### 3.8 FRAGE 16: INFORMATION ÜBER DIE VERSCHIEDENEN THERAPIEOPTIONEN NACH KEY VARIABLEN II

| 1 = sehr gut - 5 = sehr schlecht |                    | 16. Information über die verschiedenen Therapieoptionen |        |    |       |    |       |    |       |    |       | Total |        |
|----------------------------------|--------------------|---------------------------------------------------------|--------|----|-------|----|-------|----|-------|----|-------|-------|--------|
|                                  |                    | 1                                                       |        | 2  |       | 3  |       | 4  |       | 5  |       | N     | col%   |
|                                  |                    | N                                                       | row%   | N  | row%  | N  | row%  | N  | row%  | N  | row%  |       |        |
| Total                            |                    | 70                                                      | 34.5%  | 50 | 24.6% | 32 | 15.8% | 34 | 16.7% | 17 | 8.4%  | 203   | 100.0% |
| Zweitmeinung bei                 | ja                 | 12                                                      | 30.0%  | 7  | 17.5% | 9  | 22.5% | 8  | 20.0% | 4  | 10.0% | 40    | 19.7%  |
| Diagnose:                        | nein               | 53                                                      | 34.9%  | 42 | 27.6% | 21 | 13.8% | 26 | 17.1% | 10 | 6.6%  | 152   | 74.9%  |
|                                  | Keine Angabe       | 5                                                       | 45.5%  | 1  | 9.1%  | 2  | 18.2% |    |       | 3  | 27.3% | 11    | 5.4%   |
| Therapieentscheid bei            | Aubagio            | 3                                                       | 100.0% |    |       |    |       |    |       |    |       | 3     | 1.5%   |
| Erstdiagnose:                    | Injizierbare       | 43                                                      | 29.7%  | 38 | 26.2% | 22 | 15.2% | 30 | 20.7% | 12 | 8.3%  | 145   | 71.4%  |
|                                  | Gilenya            | 11                                                      | 52.4%  | 4  | 19.0% | 4  | 19.0% |    |       | 2  | 9.5%  | 21    | 10.3%  |
|                                  | Tecfidera          | 4                                                       | 28.6%  | 4  | 28.6% | 3  | 21.4% | 2  | 14.3% | 1  | 7.1%  | 14    | 6.9%   |
|                                  | Tysabri            | 4                                                       | 44.4%  | 3  | 33.3% |    |       | 1  | 11.1% | 1  | 11.1% | 9     | 4.4%   |
|                                  | Andere             | 1                                                       | 25.0%  | 1  | 25.0% |    |       | 1  | 25.0% | 1  | 25.0% | 4     | 2.0%   |
|                                  | Keine Angabe       | 4                                                       | 57.1%  |    |       | 3  | 42.9% |    |       |    |       | 7     | 3.4%   |
| Rebif bei                        | nein               | 53                                                      | 36.3%  | 33 | 22.6% | 24 | 16.4% | 22 | 15.1% | 14 | 9.6%  | 146   | 71.9%  |
| Erstdiagnose:                    | ja                 | 17                                                      | 29.8%  | 17 | 29.8% | 8  | 14.0% | 12 | 21.1% | 3  | 5.3%  | 57    | 28.1%  |
| Aktuelle Behandlung:             | Aubagio            | 5                                                       | 71.4%  | 1  | 14.3% |    |       | 1  | 14.3% |    |       | 7     | 3.4%   |
|                                  | Injizierbare       | 12                                                      | 31.6%  | 11 | 28.9% | 8  | 21.1% | 6  | 15.8% | 1  | 2.6%  | 38    | 18.7%  |
|                                  | Gilenya            | 20                                                      | 32.3%  | 18 | 29.0% | 11 | 17.7% | 8  | 12.9% | 5  | 8.1%  | 62    | 30.5%  |
|                                  | Tecfidera          | 8                                                       | 42.1%  | 5  | 26.3% |    |       | 6  | 31.6% |    |       | 19    | 9.4%   |
|                                  | Tysabri            | 16                                                      | 29.6%  | 13 | 24.1% | 7  | 13.0% | 7  | 13.0% | 11 | 20.4% | 54    | 26.6%  |
|                                  | Andere             | 2                                                       | 66.7%  |    |       | 1  | 33.3% |    |       |    |       | 3     | 1.5%   |
|                                  | keine Therapie     | 7                                                       | 38.9%  | 1  | 5.6%  | 5  | 27.8% | 5  | 27.8% |    |       | 18    | 8.9%   |
|                                  | Keine Angabe       |                                                         |        | 1  | 50.0% |    |       | 1  | 50.0% |    |       | 2     | 1.0%   |
| Rebif ist aktuelle               | nein               | 67                                                      | 35.1%  | 45 | 23.6% | 30 | 15.7% | 33 | 17.3% | 16 | 8.4%  | 191   | 94.1%  |
| Behandlung:                      | ja                 | 3                                                       | 25.0%  | 5  | 41.7% | 2  | 16.7% | 1  | 8.3%  | 1  | 8.3%  | 12    | 5.9%   |
| Anzahl MS Langzeit-              | Erste MS Therapie  | 24                                                      | 42.9%  | 15 | 26.8% | 8  | 14.3% | 7  | 12.5% | 2  | 3.6%  | 56    | 27.6%  |
| Therapien:                       | Zweite MS Therapie | 24                                                      | 29.3%  | 20 | 24.4% | 13 | 15.9% | 16 | 19.5% | 9  | 11.0% | 82    | 40.4%  |
|                                  | Dritte oder mehr   | 13                                                      | 28.9%  | 14 | 31.1% | 6  | 13.3% | 6  | 13.3% | 6  | 13.3% | 45    | 22.2%  |
|                                  | Keine Angabe       | 9                                                       | 45.0%  | 1  | 5.0%  | 5  | 25.0% | 5  | 25.0% |    |       | 20    | 9.9%   |
| Rückblickend gleiche             | ja                 | 50                                                      | 40.7%  | 30 | 24.4% | 18 | 14.6% | 19 | 15.4% | 6  | 4.9%  | 123   | 60.6%  |
| Therapie:                        | nein               | 9                                                       | 16.4%  | 15 | 27.3% | 11 | 20.0% | 13 | 23.6% | 7  | 12.7% | 55    | 27.1%  |
|                                  | Keine Angabe       | 11                                                      | 44.0%  | 5  | 20.0% | 3  | 12.0% | 2  | 8.0%  | 4  | 16.0% | 25    | 12.3%  |

### 3.9 FRAGE 17: ALLE DAMALS MÖGLICHEN THERAPIEN VORGESTELLT NACH KEY VARIABLEN I

|                                      |                                   | 17. Hat Ihnen Ihr Neurologe nach Ihrer Diagnose Ihrer Meinung nach alle (damals möglichen) Therapien vorgestellt? |       |      |       |                      |        |              |       | Total |        |
|--------------------------------------|-----------------------------------|-------------------------------------------------------------------------------------------------------------------|-------|------|-------|----------------------|--------|--------------|-------|-------|--------|
|                                      |                                   | Ja                                                                                                                |       | Nein |       | Weiss ich nicht mehr |        | Keine Angabe |       | N     | col%   |
|                                      |                                   | N                                                                                                                 | row%  | N    | row%  | N                    | row%   | N            | row%  |       |        |
| Total                                |                                   | 128                                                                                                               | 60.4% | 54   | 25.5% | 27                   | 12.7%  | 3            | 1.4%  | 212   | 100.0% |
| Geschlecht:                          | Weiblich                          | 95                                                                                                                | 61.3% | 39   | 25.2% | 18                   | 11.6%  | 3            | 1.9%  | 155   | 73.1%  |
|                                      | Männlich                          | 32                                                                                                                | 58.2% | 15   | 27.3% | 8                    | 14.5%  |              |       | 55    | 25.9%  |
|                                      | Keine Angabe                      | 1                                                                                                                 | 50.0% |      |       | 1                    | 50.0%  |              |       | 2     | 0.9%   |
|                                      |                                   |                                                                                                                   |       |      |       |                      |        |              |       |       |        |
| Altersgruppe:                        | bis 30 Jahre                      | 20                                                                                                                | 60.6% | 9    | 27.3% | 4                    | 12.1%  |              |       | 33    | 15.6%  |
|                                      | 31 – 40 Jahre                     | 37                                                                                                                | 66.1% | 13   | 23.2% | 6                    | 10.7%  |              |       | 56    | 26.4%  |
|                                      | 41 – 45 Jahre                     | 17                                                                                                                | 45.9% | 11   | 29.7% | 8                    | 21.6%  | 1            | 2.7%  | 37    | 17.5%  |
|                                      | über 45 Jahre                     | 53                                                                                                                | 63.1% | 21   | 25.0% | 8                    | 9.5%   | 2            | 2.4%  | 84    | 39.6%  |
|                                      | Keine Angabe                      | 1                                                                                                                 | 50.0% |      |       | 1                    | 50.0%  |              |       | 2     | 0.9%   |
|                                      |                                   |                                                                                                                   |       |      |       |                      |        |              |       |       |        |
| höchste Berufsausbildung:            | Obligatorische Schule/Anlehre     | 9                                                                                                                 | 52.9% | 4    | 23.5% | 4                    | 23.5%  |              |       | 17    | 8.0%   |
|                                      | Berufslehre/ - schule             | 60                                                                                                                | 61.2% | 25   | 25.5% | 12                   | 12.2%  | 1            | 1.0%  | 98    | 46.2%  |
|                                      | Höhere Fach- und Berufsausbildung | 38                                                                                                                | 63.3% | 14   | 23.3% | 7                    | 11.7%  | 1            | 1.7%  | 60    | 28.3%  |
|                                      | Universität / Fachhochschule      | 20                                                                                                                | 58.8% | 10   | 29.4% | 3                    | 8.8%   | 1            | 2.9%  | 34    | 16.0%  |
|                                      | Keine Angabe                      | 1                                                                                                                 | 33.3% | 1    | 33.3% | 1                    | 33.3%  |              |       | 3     | 1.4%   |
| Form der MS:                         | CIS                               | 4                                                                                                                 | 80.0% | 1    | 20.0% |                      |        |              |       | 5     | 2.4%   |
|                                      | RRMS                              | 118                                                                                                               | 62.1% | 49   | 25.8% | 21                   | 11.1%  | 2            | 1.1%  | 190   | 89.6%  |
|                                      | SPMS                              | 6                                                                                                                 | 40.0% | 4    | 26.7% | 4                    | 26.7%  | 1            | 6.7%  | 15    | 7.1%   |
|                                      | Keine Angabe                      |                                                                                                                   |       |      |       | 2                    | 100.0% |              |       | 2     | 0.9%   |
| Dauer seit der Diagnose:             | < 12 Monate                       | 11                                                                                                                | 61.1% | 6    | 33.3% | 1                    | 5.6%   |              |       | 18    | 8.5%   |
|                                      | 1 – 3 Jahre                       | 23                                                                                                                | 79.3% | 5    | 17.2% | 1                    | 3.4%   |              |       | 29    | 13.7%  |
|                                      | 3 – 5 Jahre                       | 17                                                                                                                | 60.7% | 8    | 28.6% | 3                    | 10.7%  |              |       | 28    | 13.2%  |
|                                      | 5 – 10 Jahre                      | 26                                                                                                                | 57.8% | 10   | 22.2% | 7                    | 15.6%  | 2            | 4.4%  | 45    | 21.2%  |
|                                      | 10 – 15 Jahre                     | 19                                                                                                                | 54.3% | 12   | 34.3% | 4                    | 11.4%  |              |       | 35    | 16.5%  |
|                                      | > 15 Jahre                        | 32                                                                                                                | 57.1% | 13   | 23.2% | 10                   | 17.9%  | 1            | 1.8%  | 56    | 26.4%  |
|                                      | Keine Angabe                      |                                                                                                                   |       |      |       | 1                    | 100.0% |              |       | 1     | 0.5%   |
| Gespräch mit Neurologe bei Diagnose: | sehr gut/gut                      | 93                                                                                                                | 78.8% | 13   | 11.0% | 10                   | 8.5%   | 2            | 1.7%  | 118   | 55.7%  |
|                                      | mittel                            | 12                                                                                                                | 46.2% | 8    | 30.8% | 6                    | 23.1%  |              |       | 26    | 12.3%  |
|                                      | schlecht/sehr schlecht            | 21                                                                                                                | 33.3% | 33   | 52.4% | 9                    | 14.3%  |              |       | 63    | 29.7%  |
|                                      | Keine Angabe                      | 2                                                                                                                 | 40.0% |      |       | 2                    | 40.0%  | 1            | 20.0% | 5     | 2.4%   |

### 3.10 FRAGE 17: ALLE DAMALS MÖGLICHEN THERAPIEN VORGESTELLT NACH KEY VARIABLEN II

|                                     |                    | 17. Hat Ihnen Ihr Neurologe nach Ihrer Diagnose Ihrer Meinung nach alle (damals möglichen) Therapien vorgestellt? |        |      |       |                      |       |              |      | Total |        |
|-------------------------------------|--------------------|-------------------------------------------------------------------------------------------------------------------|--------|------|-------|----------------------|-------|--------------|------|-------|--------|
|                                     |                    | Ja                                                                                                                |        | Nein |       | Weiss ich nicht mehr |       | Keine Angabe |      | N     | col%   |
|                                     |                    | N                                                                                                                 | row%   | N    | row%  | N                    | row%  | N            | row% |       |        |
| Total                               |                    | 128                                                                                                               | 60.4%  | 54   | 25.5% | 27                   | 12.7% | 3            | 1.4% | 212   | 100.0% |
| Zweitmeinung bei Diagnose:          | ja                 | 20                                                                                                                | 48.8%  | 16   | 39.0% | 3                    | 7.3%  | 2            | 4.9% | 41    | 19.3%  |
|                                     | nein               | 102                                                                                                               | 64.6%  | 34   | 21.5% | 21                   | 13.3% | 1            | 0.6% | 158   | 74.5%  |
|                                     | Keine Angabe       | 6                                                                                                                 | 46.2%  | 4    | 30.8% | 3                    | 23.1% |              |      | 13    | 6.1%   |
|                                     |                    |                                                                                                                   |        |      |       |                      |       |              |      |       |        |
| Therapieentscheid bei Erstdiagnose: | Aubagio            | 3                                                                                                                 | 75.0%  | 1    | 25.0% |                      |       |              |      | 4     | 1.9%   |
|                                     | Injizierbare       | 90                                                                                                                | 59.6%  | 36   | 23.8% | 22                   | 14.6% | 3            | 2.0% | 151   | 71.2%  |
|                                     | Gilenya            | 14                                                                                                                | 63.6%  | 5    | 22.7% | 3                    | 13.6% |              |      | 22    | 10.4%  |
|                                     | Tecfidera          | 9                                                                                                                 | 64.3%  | 5    | 35.7% |                      |       |              |      | 14    | 6.6%   |
|                                     | Tysabri            | 8                                                                                                                 | 80.0%  | 1    | 10.0% | 1                    | 10.0% |              |      | 10    | 4.7%   |
|                                     | Andere             | 1                                                                                                                 | 25.0%  | 3    | 75.0% |                      |       |              |      | 4     | 1.9%   |
|                                     | Keine Angabe       | 3                                                                                                                 | 42.9%  | 3    | 42.9% | 1                    | 14.3% |              |      | 7     | 3.3%   |
| Rebif bei Erstdiagnose:             | nein               | 92                                                                                                                | 60.5%  | 38   | 25.0% | 20                   | 13.2% | 2            | 1.3% | 152   | 71.7%  |
|                                     | ja                 | 36                                                                                                                | 60.0%  | 16   | 26.7% | 7                    | 11.7% | 1            | 1.7% | 60    | 28.3%  |
| Aktuelle Behandlung:                | Aubagio            | 6                                                                                                                 | 75.0%  | 1    | 12.5% | 1                    | 12.5% |              |      | 8     | 3.8%   |
|                                     | Injizierbare       | 25                                                                                                                | 64.1%  | 9    | 23.1% | 4                    | 10.3% | 1            | 2.6% | 39    | 18.4%  |
|                                     | Gilenya            | 40                                                                                                                | 62.5%  | 14   | 21.9% | 9                    | 14.1% | 1            | 1.6% | 64    | 30.2%  |
|                                     | Tecfidera          | 13                                                                                                                | 65.0%  | 5    | 25.0% | 2                    | 10.0% |              |      | 20    | 9.4%   |
|                                     | Tysabri            | 33                                                                                                                | 57.9%  | 17   | 29.8% | 7                    | 12.3% |              |      | 57    | 26.9%  |
|                                     | Andere             | 3                                                                                                                 | 100.0% |      |       |                      |       |              |      | 3     | 1.4%   |
|                                     | keine Therapie     | 8                                                                                                                 | 42.1%  | 7    | 36.8% | 3                    | 15.8% | 1            | 5.3% | 19    | 9.0%   |
|                                     | Keine Angabe       |                                                                                                                   |        | 1    | 50.0% | 1                    | 50.0% |              |      | 2     | 0.9%   |
| Rebif ist aktuelle Behandlung:      | nein               | 120                                                                                                               | 60.0%  | 50   | 25.0% | 27                   | 13.5% | 3            | 1.5% | 200   | 94.3%  |
|                                     | ja                 | 8                                                                                                                 | 66.7%  | 4    | 33.3% |                      |       |              |      | 12    | 5.7%   |
| Anzahl MS Langzeit-Therapien:       | Erste MS Therapie  | 40                                                                                                                | 69.0%  | 13   | 22.4% | 4                    | 6.9%  | 1            | 1.7% | 58    | 27.4%  |
|                                     | Zweite MS Therapie | 52                                                                                                                | 61.9%  | 23   | 27.4% | 9                    | 10.7% |              |      | 84    | 39.6%  |
|                                     | Dritte oder mehr   | 26                                                                                                                | 54.2%  | 11   | 22.9% | 11                   | 22.9% |              |      | 48    | 22.6%  |
|                                     | Keine Angabe       | 10                                                                                                                | 45.5%  | 7    | 31.8% | 3                    | 13.6% | 2            | 9.1% | 22    | 10.4%  |
| Rückblickend gleiche Therapie:      | ja                 | 85                                                                                                                | 66.4%  | 27   | 21.1% | 15                   | 11.7% | 1            | 0.8% | 128   | 60.4%  |
|                                     | nein               | 27                                                                                                                | 48.2%  | 22   | 39.3% | 7                    | 12.5% |              |      | 56    | 26.4%  |
|                                     | Keine Angabe       | 16                                                                                                                | 57.1%  | 5    | 17.9% | 5                    | 17.9% | 2            | 7.1% | 28    | 13.2%  |

### 3.11 FRAGE 18: NEUROLOGE HAT ZU EINER BESTIMMTEN THERAPIE GERATEN NACH KEY VARIABLEN I

|                                            |                                   | 18. Hat Ihnen Ihr Neurologe zu einer bestimmten Therapie geraten? |        |      |       |                      |       |              |       | Total |        |
|--------------------------------------------|-----------------------------------|-------------------------------------------------------------------|--------|------|-------|----------------------|-------|--------------|-------|-------|--------|
|                                            |                                   | Ja                                                                |        | Nein |       | Weiss ich nicht mehr |       | Keine Angabe |       | N     | col%   |
|                                            |                                   | N                                                                 | row%   | N    | row%  | N                    | row%  | N            | row%  |       |        |
| Total                                      |                                   | 160                                                               | 75.5%  | 31   | 14.6% | 13                   | 6.1%  | 8            | 3.8%  | 212   | 100.0% |
| Geschlecht:                                | Weiblich                          | 117                                                               | 75.5%  | 22   | 14.2% | 10                   | 6.5%  | 6            | 3.9%  | 155   | 73.1%  |
|                                            | Männlich                          | 41                                                                | 74.5%  | 9    | 16.4% | 3                    | 5.5%  | 2            | 3.6%  | 55    | 25.9%  |
|                                            | Keine Angabe                      | 2                                                                 | 100.0% |      |       |                      |       |              |       | 2     | 0.9%   |
|                                            |                                   |                                                                   |        |      |       |                      |       |              |       |       |        |
| Altersgruppe:                              | bis 30 Jahre                      | 25                                                                | 75.8%  | 5    | 15.2% | 2                    | 6.1%  | 1            | 3.0%  | 33    | 15.6%  |
|                                            | 31 – 40 Jahre                     | 39                                                                | 69.6%  | 9    | 16.1% | 3                    | 5.4%  | 5            | 8.9%  | 56    | 26.4%  |
|                                            | 41 – 45 Jahre                     | 27                                                                | 73.0%  | 5    | 13.5% | 5                    | 13.5% |              |       | 37    | 17.5%  |
|                                            | über 45 Jahre                     | 67                                                                | 79.8%  | 12   | 14.3% | 3                    | 3.6%  | 2            | 2.4%  | 84    | 39.6%  |
|                                            | Keine Angabe                      | 2                                                                 | 100.0% |      |       |                      |       |              |       | 2     | 0.9%   |
| höchste<br>Berufsausbildung:               | Obligatorische Schule/Anlehre     | 14                                                                | 82.4%  |      |       | 3                    | 17.6% |              |       | 17    | 8.0%   |
|                                            | Berufslehre/ - schule             | 72                                                                | 73.5%  | 13   | 13.3% | 7                    | 7.1%  | 6            | 6.1%  | 98    | 46.2%  |
|                                            | Höhere Fach- und Berufsausbildung | 44                                                                | 73.3%  | 13   | 21.7% | 2                    | 3.3%  | 1            | 1.7%  | 60    | 28.3%  |
|                                            | Universität / Fachhochschule      | 27                                                                | 79.4%  | 5    | 14.7% | 1                    | 2.9%  | 1            | 2.9%  | 34    | 16.0%  |
|                                            | Keine Angabe                      | 3                                                                 | 100.0% |      |       |                      |       |              |       | 3     | 1.4%   |
| Form der MS:                               | CIS                               | 4                                                                 | 80.0%  |      |       |                      |       | 1            | 20.0% | 5     | 2.4%   |
|                                            | RRMS                              | 144                                                               | 75.8%  | 27   | 14.2% | 12                   | 6.3%  | 7            | 3.7%  | 190   | 89.6%  |
|                                            | SPMS                              | 10                                                                | 66.7%  | 4    | 26.7% | 1                    | 6.7%  |              |       | 15    | 7.1%   |
|                                            | Keine Angabe                      | 2                                                                 | 100.0% |      |       |                      |       |              |       | 2     | 0.9%   |
| Dauer seit der<br>Diagnose:                | < 12 Monate                       | 11                                                                | 61.1%  | 4    | 22.2% |                      |       | 3            | 16.7% | 18    | 8.5%   |
|                                            | 1 – 3 Jahre                       | 24                                                                | 82.8%  | 5    | 17.2% |                      |       |              |       | 29    | 13.7%  |
|                                            | 3 – 5 Jahre                       | 21                                                                | 75.0%  | 5    | 17.9% |                      |       | 2            | 7.1%  | 28    | 13.2%  |
|                                            | 5 – 10 Jahre                      | 36                                                                | 80.0%  | 2    | 4.4%  | 6                    | 13.3% | 1            | 2.2%  | 45    | 21.2%  |
|                                            | 10 – 15 Jahre                     | 26                                                                | 74.3%  | 4    | 11.4% | 4                    | 11.4% | 1            | 2.9%  | 35    | 16.5%  |
|                                            | > 15 Jahre                        | 41                                                                | 73.2%  | 11   | 19.6% | 3                    | 5.4%  | 1            | 1.8%  | 56    | 26.4%  |
|                                            | Keine Angabe                      | 1                                                                 | 100.0% |      |       |                      |       |              |       | 1     | 0.5%   |
| Gespräch mit<br>Neurologe bei<br>Diagnose: | sehr gut/gut                      | 91                                                                | 77.1%  | 17   | 14.4% | 7                    | 5.9%  | 3            | 2.5%  | 118   | 55.7%  |
|                                            | mittel                            | 18                                                                | 69.2%  | 5    | 19.2% | 2                    | 7.7%  | 1            | 3.8%  | 26    | 12.3%  |
|                                            | schlecht/sehr schlecht            | 48                                                                | 76.2%  | 9    | 14.3% | 3                    | 4.8%  | 3            | 4.8%  | 63    | 29.7%  |
|                                            | Keine Angabe                      | 3                                                                 | 60.0%  |      |       | 1                    | 20.0% | 1            | 20.0% | 5     | 2.4%   |

### 3.12 FRAGE 18: NEUROLOGE HAT ZU EINER BESTIMMTEN THERAPIE GERATEN NACH KEY VARIABLEN II

|                                     |                    | 18. Hat Ihnen Ihr Neurologe zu einer bestimmten Therapie geraten? |        |      |       |                      |       |              |       | Total |        |
|-------------------------------------|--------------------|-------------------------------------------------------------------|--------|------|-------|----------------------|-------|--------------|-------|-------|--------|
|                                     |                    | Ja                                                                |        | Nein |       | Weiss ich nicht mehr |       | Keine Angabe |       | N     | col%   |
|                                     |                    | N                                                                 | row%   | N    | row%  | N                    | row%  | N            | row%  |       |        |
| Total                               |                    | 160                                                               | 75.5%  | 31   | 14.6% | 13                   | 6.1%  | 8            | 3.8%  | 212   | 100.0% |
| Zweitmeinung bei Diagnose:          | ja                 | 29                                                                | 70.7%  | 7    | 17.1% | 3                    | 7.3%  | 2            | 4.9%  | 41    | 19.3%  |
|                                     | nein               | 127                                                               | 80.4%  | 23   | 14.6% | 6                    | 3.8%  | 2            | 1.3%  | 158   | 74.5%  |
|                                     | Keine Angabe       | 4                                                                 | 30.8%  | 1    | 7.7%  | 4                    | 30.8% | 4            | 30.8% | 13    | 6.1%   |
| Therapieentscheid bei Erstdiagnose: | Aubagio            | 4                                                                 | 100.0% |      |       |                      |       |              |       | 4     | 1.9%   |
|                                     | Injizierbare       | 113                                                               | 74.8%  | 22   | 14.6% | 12                   | 7.9%  | 4            | 2.6%  | 151   | 71.2%  |
|                                     | Gilenya            | 18                                                                | 81.8%  | 2    | 9.1%  |                      |       | 2            | 9.1%  | 22    | 10.4%  |
|                                     | Tecfidera          | 11                                                                | 78.6%  | 3    | 21.4% |                      |       |              |       | 14    | 6.6%   |
|                                     | Tysabri            | 9                                                                 | 90.0%  |      |       |                      |       | 1            | 10.0% | 10    | 4.7%   |
|                                     | Andere             | 2                                                                 | 50.0%  | 1    | 25.0% |                      |       | 1            | 25.0% | 4     | 1.9%   |
|                                     | Keine Angabe       | 3                                                                 | 42.9%  | 3    | 42.9% | 1                    | 14.3% |              |       | 7     | 3.3%   |
| Rebif bei Erstdiagnose:             | nein               | 112                                                               | 73.7%  | 26   | 17.1% | 8                    | 5.3%  | 6            | 3.9%  | 152   | 71.7%  |
|                                     | ja                 | 48                                                                | 80.0%  | 5    | 8.3%  | 5                    | 8.3%  | 2            | 3.3%  | 60    | 28.3%  |
| Aktuelle Behandlung:                | Aubagio            | 6                                                                 | 75.0%  | 1    | 12.5% | 1                    | 12.5% |              |       | 8     | 3.8%   |
|                                     | Injizierbare       | 23                                                                | 59.0%  | 13   | 33.3% | 1                    | 2.6%  | 2            | 5.1%  | 39    | 18.4%  |
|                                     | Gilenya            | 49                                                                | 76.6%  | 8    | 12.5% | 4                    | 6.3%  | 3            | 4.7%  | 64    | 30.2%  |
|                                     | Tecfidera          | 17                                                                | 85.0%  | 2    | 10.0% | 1                    | 5.0%  |              |       | 20    | 9.4%   |
|                                     | Tysabri            | 46                                                                | 80.7%  | 4    | 7.0%  | 5                    | 8.8%  | 2            | 3.5%  | 57    | 26.9%  |
|                                     | Andere             | 3                                                                 | 100.0% |      |       |                      |       |              |       | 3     | 1.4%   |
|                                     | keine Therapie     | 14                                                                | 73.7%  | 3    | 15.8% | 1                    | 5.3%  | 1            | 5.3%  | 19    | 9.0%   |
|                                     | Keine Angabe       | 2                                                                 | 100.0% |      |       |                      |       |              |       | 2     | 0.9%   |
| Rebif ist aktuelle Behandlung:      | nein               | 152                                                               | 76.0%  | 28   | 14.0% | 13                   | 6.5%  | 7            | 3.5%  | 200   | 94.3%  |
|                                     | ja                 | 8                                                                 | 66.7%  | 3    | 25.0% |                      |       | 1            | 8.3%  | 12    | 5.7%   |
| Anzahl MS Langzeit-Therapien:       | Erste MS Therapie  | 44                                                                | 75.9%  | 10   | 17.2% | 2                    | 3.4%  | 2            | 3.4%  | 58    | 27.4%  |
|                                     | Zweite MS Therapie | 65                                                                | 77.4%  | 13   | 15.5% | 3                    | 3.6%  | 3            | 3.6%  | 84    | 39.6%  |
|                                     | Dritte oder mehr   | 34                                                                | 70.8%  | 5    | 10.4% | 7                    | 14.6% | 2            | 4.2%  | 48    | 22.6%  |
|                                     | Keine Angabe       | 17                                                                | 77.3%  | 3    | 13.6% | 1                    | 4.5%  | 1            | 4.5%  | 22    | 10.4%  |
| Rückblickend gleiche Therapie:      | ja                 | 102                                                               | 79.7%  | 18   | 14.1% | 6                    | 4.7%  | 2            | 1.6%  | 128   | 60.4%  |
|                                     | nein               | 41                                                                | 73.2%  | 10   | 17.9% | 4                    | 7.1%  | 1            | 1.8%  | 56    | 26.4%  |
|                                     | Keine Angabe       | 17                                                                | 60.7%  | 3    | 10.7% | 3                    | 10.7% | 5            | 17.9% | 28    | 13.2%  |

### 3.13 FRAGE 19: INFORMATIONEN ZU MS-LANGZEITTHERAPEUTIKA NACH AKTUELLER THERAPIE

Wo haben Sie Informationen zu den Therapiemöglichkeiten der verschiedenen MS-Langzeittherapien eingeholt?

| (Mehrfachnennungen)                                        | Aktuelle Behandlung: |       |              |       |         |       |           |       |         |       |        |       |                |       |              |       | Total |       |
|------------------------------------------------------------|----------------------|-------|--------------|-------|---------|-------|-----------|-------|---------|-------|--------|-------|----------------|-------|--------------|-------|-------|-------|
|                                                            | Aubagio              |       | Injizierbare |       | Gilenya |       | Tecfidera |       | Tysabri |       | Andere |       | keine Therapie |       | Keine Angabe |       | N     | col%  |
|                                                            | N                    | col%  | N            | col%  | N       | col%  | N         | col%  | N       | col%  | N      | col%  | N              | col%  | N            | col%  |       |       |
| Total                                                      | 8                    | 100%  | 39           | 100%  | 64      | 100%  | 20        | 100%  | 57      | 100%  | 3      | 100%  | 19             | 100%  | 2            | 100%  | 212   | 100%  |
| Behandelnde Neurologin / behandelnder Neurologe            | 7                    | 87.5% | 33           | 84.6% | 50      | 78.1% | 20        | 100%  | 45      | 78.9% | 3      | 100%  | 16             | 84.2% |              |       | 174   | 82.1% |
| Hausarzt                                                   | 1                    | 12.5% | 10           | 25.6% | 10      | 15.6% | 6         | 30.0% | 10      | 17.5% | 2      | 66.7% | 3              | 15.8% | 1            | 50.0% | 43    | 20.3% |
| MS-Pflegefachperson                                        | 1                    | 12.5% | 14           | 35.9% | 13      | 20.3% | 4         | 20.0% | 6       | 10.5% | 1      | 33.3% | 3              | 15.8% | 1            | 50.0% | 43    | 20.3% |
| Frauenarzt / Frauenärztin                                  |                      |       | 1            | 2.6%  |         |       |           |       |         |       |        |       |                |       |              |       | 1     | 0.5%  |
| Internet                                                   | 1                    | 12.5% | 23           | 59.0% | 37      | 57.8% | 9         | 45.0% | 30      | 52.6% |        |       | 10             | 52.6% | 1            | 50.0% | 111   | 52.4% |
| Fortbildungsseminare                                       |                      |       | 6            | 15.4% | 5       | 7.8%  | 1         | 5.0%  | 2       | 3.5%  |        |       | 3              | 15.8% |              |       | 17    | 8.0%  |
| Austausch mit anderen MS-Betroffenen                       |                      |       | 9            | 23.1% | 13      | 20.3% | 5         | 25.0% | 12      | 21.1% |        |       | 12             | 63.2% |              |       | 51    | 24.1% |
| Bekannte / Freunde                                         |                      |       | 6            | 15.4% | 7       | 10.9% | 2         | 10.0% | 7       | 12.3% |        |       | 6              | 31.6% |              |       | 28    | 13.2% |
| Ich habe mir zu diesem Thema keine Informationen eingeholt | 1                    | 12.5% | 1            | 2.6%  | 2       | 3.1%  |           |       | 2       | 3.5%  | 1      | 33.3% | 1              | 5.3%  |              |       | 8     | 3.8%  |
| Keine Angabe                                               |                      |       |              |       |         |       |           |       | 2       | 3.5%  |        |       |                |       |              |       | 2     | 0.9%  |

### 3.14 FRAGE 19: INFORMATIONEN ZU MS-LANGZEITTHERAPEUTIKA NACH THERAPIE BEI ERSTDIAGNOSE

Wo haben Sie Informationen zu den Therapiemöglichkeiten der verschiedenen MS-Langzeittherapien eingeholt?

| (Mehrfachnennungen)                                        | Therapieentscheid bei Erstdiagnose: |       |              |       |         |       |           |       |         |       |        |       |              |       | Total |       |
|------------------------------------------------------------|-------------------------------------|-------|--------------|-------|---------|-------|-----------|-------|---------|-------|--------|-------|--------------|-------|-------|-------|
|                                                            | Aubagio                             |       | Injizierbare |       | Gilenya |       | Tecfidera |       | Tysabri |       | Andere |       | Keine Angabe |       | N     | col%  |
|                                                            | N                                   | col%  | N            | col%  | N       | col%  | N         | col%  | N       | col%  | N      | col%  | N            | col%  |       |       |
| Total                                                      | 4                                   | 100%  | 151          | 100%  | 22      | 100%  | 14        | 100%  | 10      | 100%  | 4      | 100%  | 7            | 100%  | 212   | 100%  |
| Behandelnde Neurologin / behandelnder Neurologe            | 3                                   | 75.0% | 122          | 80.8% | 18      | 81.8% | 13        | 92.9% | 9       | 90.0% | 2      | 50.0% | 7            | 100%  | 174   | 82.1% |
| Hausarzt                                                   | 1                                   | 25.0% | 31           | 20.5% | 1       | 4.5%  | 5         | 35.7% | 2       | 20.0% | 1      | 25.0% | 2            | 28.6% | 43    | 20.3% |
| MS-Pflegefachperson                                        |                                     |       | 37           | 24.5% | 5       | 22.7% |           |       |         |       | 1      | 25.0% |              |       | 43    | 20.3% |
| Frauenarzt / Frauenärztin                                  |                                     |       | 1            | 0.7%  |         |       |           |       |         |       |        |       |              |       | 1     | 0.5%  |
| Internet                                                   | 1                                   | 25.0% | 82           | 54.3% | 12      | 54.5% | 9         | 64.3% | 3       | 30.0% | 2      | 50.0% | 2            | 28.6% | 111   | 52.4% |
| Fortbildungsseminare                                       |                                     |       | 14           | 9.3%  | 2       | 9.1%  |           |       |         |       |        |       | 1            | 14.3% | 17    | 8.0%  |
| Austausch mit anderen MS-Betroffenen                       |                                     |       | 41           | 27.2% | 2       | 9.1%  | 4         | 28.6% | 1       | 10.0% | 2      | 50.0% | 1            | 14.3% | 51    | 24.1% |
| Bekannte / Freunde                                         |                                     |       | 21           | 13.9% |         |       | 4         | 28.6% | 1       | 10.0% | 2      | 50.0% |              |       | 28    | 13.2% |
| Ich habe mir zu diesem Thema keine Informationen eingeholt | 1                                   | 25.0% | 4            | 2.6%  | 1       | 4.5%  |           |       | 1       | 10.0% |        |       | 1            | 14.3% | 8     | 3.8%  |
| Keine Angabe                                               |                                     |       | 1            | 0.7%  |         |       |           |       | 1       | 10.0% |        |       |              |       | 2     | 0.9%  |

### 3.15 FRAGE 20: ROLLE DER THERAPIEBEGLEITUNG BEIM THERAPIEENTSCHEID NACH KEY VARIABLEN I

| 1 = keine Rolle - 5 = sehr wichtige Rolle |                                   | 20. Welche Rolle hatte Ihre Therapiebegleitung (z.B. MS Nurse/MS Pflegefachperson) beim Therapieentscheid? |       |    |       |    |       |    |       |    |       |                          |        | Total |        |
|-------------------------------------------|-----------------------------------|------------------------------------------------------------------------------------------------------------|-------|----|-------|----|-------|----|-------|----|-------|--------------------------|--------|-------|--------|
|                                           |                                   | 1                                                                                                          |       | 2  |       | 3  |       | 4  |       | 5  |       | Keine Therapiebegleitung |        | N     | col%   |
|                                           |                                   | N                                                                                                          | row%  | N  | row%  | N  | row%  | N  | row%  | N  | row%  | N                        | row%   |       |        |
| Total                                     |                                   | 53                                                                                                         | 27.6% | 12 | 6.3%  | 21 | 10.9% | 29 | 15.1% | 25 | 13.0% | 52                       | 27.1%  | 192   | 100.0% |
| Geschlecht:                               | Weiblich                          | 41                                                                                                         | 29.7% | 7  | 5.1%  | 17 | 12.3% | 21 | 15.2% | 19 | 13.8% | 33                       | 23.9%  | 138   | 71.9%  |
|                                           | Männlich                          | 12                                                                                                         | 23.1% | 5  | 9.6%  | 4  | 7.7%  | 8  | 15.4% | 6  | 11.5% | 17                       | 32.7%  | 52    | 27.1%  |
|                                           | Keine Angabe                      |                                                                                                            |       |    |       |    |       |    |       |    |       | 2                        | 100.0% | 2     | 1.0%   |
|                                           |                                   |                                                                                                            |       |    |       |    |       |    |       |    |       |                          |        |       |        |
| Altersgruppe:                             | bis 30 Jahre                      | 6                                                                                                          | 21.4% | 1  | 3.6%  | 2  | 7.1%  | 7  | 25.0% | 4  | 14.3% | 8                        | 28.6%  | 28    | 14.6%  |
|                                           | 31 – 40 Jahre                     | 17                                                                                                         | 34.0% | 1  | 2.0%  | 5  | 10.0% | 9  | 18.0% | 4  | 8.0%  | 14                       | 28.0%  | 50    | 26.0%  |
|                                           | 41 – 45 Jahre                     | 9                                                                                                          | 28.1% | 4  | 12.5% | 3  | 9.4%  | 5  | 15.6% | 2  | 6.3%  | 9                        | 28.1%  | 32    | 16.7%  |
|                                           | über 45 Jahre                     | 21                                                                                                         | 26.3% | 6  | 7.5%  | 11 | 13.8% | 8  | 10.0% | 15 | 18.8% | 19                       | 23.8%  | 80    | 41.7%  |
|                                           | Keine Angabe                      |                                                                                                            |       |    |       |    |       |    |       |    |       | 2                        | 100.0% | 2     | 1.0%   |
| höchste Berufsausbildung:                 | Obligatorische Schule/Anlehre     | 7                                                                                                          | 43.8% | 1  | 6.3%  |    |       | 4  | 25.0% | 3  | 18.8% | 1                        | 6.3%   | 16    | 8.3%   |
|                                           | Berufslehre/ - schule             | 21                                                                                                         | 24.7% | 5  | 5.9%  | 9  | 10.6% | 11 | 12.9% | 15 | 17.6% | 24                       | 28.2%  | 85    | 44.3%  |
|                                           | Höhere Fach- und Berufsausbildung | 12                                                                                                         | 21.4% | 5  | 8.9%  | 10 | 17.9% | 11 | 19.6% | 5  | 8.9%  | 13                       | 23.2%  | 56    | 29.2%  |
|                                           | Universität / Fachhochschule      | 13                                                                                                         | 40.6% | 1  | 3.1%  | 2  | 6.3%  | 2  | 6.3%  | 2  | 6.3%  | 12                       | 37.5%  | 32    | 16.7%  |
|                                           | Keine Angabe                      |                                                                                                            |       |    |       |    |       | 1  | 33.3% |    |       | 2                        | 66.7%  | 3     | 1.6%   |
| Form der MS:                              | CIS                               |                                                                                                            |       |    |       |    |       | 1  | 25.0% | 1  | 25.0% | 2                        | 50.0%  | 4     | 2.1%   |
|                                           | RRMS                              | 50                                                                                                         | 28.9% | 10 | 5.8%  | 21 | 12.1% | 26 | 15.0% | 23 | 13.3% | 43                       | 24.9%  | 173   | 90.1%  |
|                                           | SPMS                              | 3                                                                                                          | 21.4% | 2  | 14.3% |    |       | 2  | 14.3% | 1  | 7.1%  | 6                        | 42.9%  | 14    | 7.3%   |
|                                           | Keine Angabe                      |                                                                                                            |       |    |       |    |       |    |       |    |       | 1                        | 100.0% | 1     | 0.5%   |
| Dauer seit der Diagnose:                  | < 12 Monate                       | 1                                                                                                          | 6.7%  |    |       | 1  | 6.7%  | 4  | 26.7% | 1  | 6.7%  | 8                        | 53.3%  | 15    | 7.8%   |
|                                           | 1 – 3 Jahre                       | 4                                                                                                          | 15.4% |    |       | 4  | 15.4% | 7  | 26.9% | 3  | 11.5% | 8                        | 30.8%  | 26    | 13.5%  |
|                                           | 3 – 5 Jahre                       | 9                                                                                                          | 37.5% | 2  | 8.3%  | 2  | 8.3%  | 3  | 12.5% | 4  | 16.7% | 4                        | 16.7%  | 24    | 12.5%  |
|                                           | 5 – 10 Jahre                      | 16                                                                                                         | 36.4% | 3  | 6.8%  | 5  | 11.4% | 5  | 11.4% | 4  | 9.1%  | 11                       | 25.0%  | 44    | 22.9%  |
|                                           | 10 – 15 Jahre                     | 11                                                                                                         | 34.4% | 4  | 12.5% |    |       | 4  | 12.5% | 5  | 15.6% | 8                        | 25.0%  | 32    | 16.7%  |
|                                           | > 15 Jahre                        | 12                                                                                                         | 24.0% | 3  | 6.0%  | 9  | 18.0% | 6  | 12.0% | 8  | 16.0% | 12                       | 24.0%  | 50    | 26.0%  |
|                                           | Keine Angabe                      |                                                                                                            |       |    |       |    |       |    |       |    |       | 1                        | 100.0% | 1     | 0.5%   |
| Gespräch mit Neurologe bei Diagnose:      | sehr gut/gut                      | 37                                                                                                         | 33.3% | 3  | 2.7%  | 9  | 8.1%  | 20 | 18.0% | 14 | 12.6% | 28                       | 25.2%  | 111   | 57.8%  |
|                                           | mittel                            | 4                                                                                                          | 19.0% | 4  | 19.0% | 2  | 9.5%  | 3  | 14.3% | 3  | 14.3% | 5                        | 23.8%  | 21    | 10.9%  |
|                                           | schlecht/sehr schlecht            | 11                                                                                                         | 19.6% | 5  | 8.9%  | 10 | 17.9% | 5  | 8.9%  | 6  | 10.7% | 19                       | 33.9%  | 56    | 29.2%  |
|                                           | Keine Angabe                      | 1                                                                                                          | 25.0% |    |       |    |       | 1  | 25.0% | 2  | 50.0% |                          |        | 4     | 2.1%   |

### 3.16 FRAGE 20: ROLLE DER THERAPIEBEGLEITUNG BEIM THERAPIEENTSCHEID NACH KEY VARIABLEN II

|                                           |                    | 20. Welche Rolle hatte Ihre Therapiebegleitung (z.B. MS Nurse/MS Pflegefachperson) beim Therapieentscheid? |       |    |       |    |       |    |       |    |       |                          |       | Total |        |
|-------------------------------------------|--------------------|------------------------------------------------------------------------------------------------------------|-------|----|-------|----|-------|----|-------|----|-------|--------------------------|-------|-------|--------|
|                                           |                    | 1                                                                                                          |       | 2  |       | 3  |       | 4  |       | 5  |       | Keine Therapiebegleitung |       | N     | col%   |
|                                           |                    | N                                                                                                          | row%  | N  | row%  | N  | row%  | N  | row%  | N  | row%  | N                        | row%  |       |        |
| 1 = keine Rolle - 5 = sehr wichtige Rolle |                    | N                                                                                                          | row%  | N  | row%  | N  | row%  | N  | row%  | N  | row%  | N                        | row%  | N     | col%   |
| Total                                     |                    | 53                                                                                                         | 27.6% | 12 | 6.3%  | 21 | 10.9% | 29 | 15.1% | 25 | 13.0% | 52                       | 27.1% | 192   | 100.0% |
| Zweitmeinung bei Diagnose:                | ja                 | 6                                                                                                          | 15.4% | 3  | 7.7%  | 7  | 17.9% | 7  | 17.9% | 6  | 15.4% | 10                       | 25.6% | 39    | 20.3%  |
|                                           | nein               | 45                                                                                                         | 30.6% | 8  | 5.4%  | 14 | 9.5%  | 22 | 15.0% | 18 | 12.2% | 40                       | 27.2% | 147   | 76.6%  |
|                                           | Keine Angabe       | 2                                                                                                          | 33.3% | 1  | 16.7% |    |       |    |       | 1  | 16.7% | 2                        | 33.3% | 6     | 3.1%   |
| Therapieentscheid bei Erstdiagnose:       | Aubagio            | 1                                                                                                          | 25.0% |    |       |    |       | 1  | 25.0% | 1  | 25.0% | 1                        | 25.0% | 4     | 2.1%   |
|                                           | Injizierbare       | 39                                                                                                         | 27.5% | 10 | 7.0%  | 17 | 12.0% | 21 | 14.8% | 22 | 15.5% | 33                       | 23.2% | 142   | 74.0%  |
|                                           | Gilenya            | 4                                                                                                          | 23.5% | 1  | 5.9%  | 2  | 11.8% | 3  | 17.6% | 1  | 5.9%  | 6                        | 35.3% | 17    | 8.9%   |
|                                           | Tecfidera          | 4                                                                                                          | 33.3% | 1  | 8.3%  | 2  | 16.7% |    |       |    |       | 5                        | 41.7% | 12    | 6.3%   |
|                                           | Tysabri            | 2                                                                                                          | 25.0% |    |       |    |       | 3  | 37.5% | 1  | 12.5% | 2                        | 25.0% | 8     | 4.2%   |
|                                           | Andere             | 1                                                                                                          | 33.3% |    |       |    |       | 1  | 33.3% |    |       | 1                        | 33.3% | 3     | 1.6%   |
|                                           | Keine Angabe       | 2                                                                                                          | 33.3% |    |       |    |       |    |       |    |       | 4                        | 66.7% | 6     | 3.1%   |
| Rebif bei Erstdiagnose:                   | nein               | 38                                                                                                         | 27.9% | 8  | 5.9%  | 14 | 10.3% | 25 | 18.4% | 14 | 10.3% | 37                       | 27.2% | 136   | 70.8%  |
|                                           | ja                 | 15                                                                                                         | 26.8% | 4  | 7.1%  | 7  | 12.5% | 4  | 7.1%  | 11 | 19.6% | 15                       | 26.8% | 56    | 29.2%  |
| Aktuelle Behandlung:                      | Aubagio            | 3                                                                                                          | 37.5% |    |       |    |       | 1  | 12.5% | 1  | 12.5% | 3                        | 37.5% | 8     | 4.2%   |
|                                           | Injizierbare       | 6                                                                                                          | 17.1% | 3  | 8.6%  | 6  | 17.1% | 5  | 14.3% | 5  | 14.3% | 10                       | 28.6% | 35    | 18.2%  |
|                                           | Gilenya            | 20                                                                                                         | 33.9% | 5  | 8.5%  | 4  | 6.8%  | 9  | 15.3% | 7  | 11.9% | 14                       | 23.7% | 59    | 30.7%  |
|                                           | Tecfidera          | 6                                                                                                          | 31.6% |    |       | 5  | 26.3% | 4  | 21.1% | 1  | 5.3%  | 3                        | 15.8% | 19    | 9.9%   |
|                                           | Tysabri            | 14                                                                                                         | 28.0% | 2  | 4.0%  | 4  | 8.0%  | 7  | 14.0% | 7  | 14.0% | 16                       | 32.0% | 50    | 26.0%  |
|                                           | Andere             | 2                                                                                                          | 66.7% |    |       |    |       |    |       | 1  | 33.3% |                          |       | 3     | 1.6%   |
|                                           | keine Therapie     | 1                                                                                                          | 6.3%  | 2  | 12.5% | 2  | 12.5% | 3  | 18.8% | 2  | 12.5% | 6                        | 37.5% | 16    | 8.3%   |
|                                           | Keine Angabe       | 1                                                                                                          | 50.0% |    |       |    |       |    |       | 1  | 50.0% |                          |       | 2     | 1.0%   |
| Rebif ist aktuelle Behandlung:            | nein               | 50                                                                                                         | 27.6% | 11 | 6.1%  | 20 | 11.0% | 28 | 15.5% | 22 | 12.2% | 50                       | 27.6% | 181   | 94.3%  |
|                                           | ja                 | 3                                                                                                          | 27.3% | 1  | 9.1%  | 1  | 9.1%  | 1  | 9.1%  | 3  | 27.3% | 2                        | 18.2% | 11    | 5.7%   |
| Anzahl MS Langzeit-Therapien:             | Erste MS Therapie  | 12                                                                                                         | 23.1% | 4  | 7.7%  | 5  | 9.6%  | 10 | 19.2% | 5  | 9.6%  | 16                       | 30.8% | 52    | 27.1%  |
|                                           | Zweite MS Therapie | 26                                                                                                         | 33.3% | 4  | 5.1%  | 8  | 10.3% | 11 | 14.1% | 8  | 10.3% | 21                       | 26.9% | 78    | 40.6%  |
|                                           | Dritte oder mehr   | 13                                                                                                         | 29.5% | 2  | 4.5%  | 6  | 13.6% | 5  | 11.4% | 9  | 20.5% | 9                        | 20.5% | 44    | 22.9%  |
|                                           | Keine Angabe       | 2                                                                                                          | 11.1% | 2  | 11.1% | 2  | 11.1% | 3  | 16.7% | 3  | 16.7% | 6                        | 33.3% | 18    | 9.4%   |
| Rückblickend gleiche Therapie:            | ja                 | 37                                                                                                         | 30.6% | 8  | 6.6%  | 13 | 10.7% | 17 | 14.0% | 14 | 11.6% | 32                       | 26.4% | 121   | 63.0%  |
|                                           | nein               | 10                                                                                                         | 20.4% | 4  | 8.2%  | 6  | 12.2% | 9  | 18.4% | 8  | 16.3% | 12                       | 24.5% | 49    | 25.5%  |
|                                           | Keine Angabe       | 6                                                                                                          | 27.3% |    |       | 2  | 9.1%  | 3  | 13.6% | 3  | 13.6% | 8                        | 36.4% | 22    | 11.5%  |

### 3.17 FRAGE 21: DAUER VON DER DIAGNOSESTELLUNG BIS ZUM THERAPIESTART NACH KEY VARIABLEN I

|                                                                          |                                | 21. Wie lange dauerte es von der Diagnosestellung bis zum Therapiestart? |       |                |       |                 |       |             |        |                          | Total |     |        |
|--------------------------------------------------------------------------|--------------------------------|--------------------------------------------------------------------------|-------|----------------|-------|-----------------|-------|-------------|--------|--------------------------|-------|-----|--------|
|                                                                          |                                | 0 – 4 Wochen                                                             |       | > 1 – 3 Monate |       | > 3 – 12 Monate |       | > 12 Monate |        | Keine Therapie erwünscht |       | N   | col%   |
|                                                                          |                                | N                                                                        | row%  | N              | row%  | N               | row%  | N           | row%   | N                        | row%  |     |        |
| Total                                                                    |                                | 67                                                                       | 32.8% | 78             | 38.2% | 26              | 12.7% | 30          | 14.7%  | 3                        | 1.5%  | 204 | 100.0% |
| 21. Wie lange dauerte es von der Diagnosestellung bis zum Therapiestart? | 0 – 4 Wochen                   | 67                                                                       | 32.8% |                |       |                 |       |             |        |                          |       | 67  | 32.8%  |
|                                                                          | > 1 – 3 Monate                 |                                                                          |       | 78             | 38.2% |                 |       |             |        |                          |       | 78  | 38.2%  |
|                                                                          | > 3 – 6 Monate                 |                                                                          |       |                |       | 15              | 7.4%  |             |        |                          |       | 15  | 7.4%   |
|                                                                          | > 6 – 12 Monate                |                                                                          |       |                |       | 11              | 5.4%  |             |        |                          |       | 11  | 5.4%   |
|                                                                          | > 12 Monate                    |                                                                          |       |                |       |                 |       | 30          | 14.7%  |                          |       | 30  | 14.7%  |
|                                                                          | Keine Therapie erwünscht       |                                                                          |       |                |       |                 |       |             |        | 3                        | 1.5%  | 3   | 1.5%   |
| Geschlecht:                                                              | Weiblich                       | 49                                                                       | 32.9% | 57             | 38.3% | 18              | 12.1% | 23          | 15.4%  | 2                        | 1.3%  | 149 | 73.0%  |
|                                                                          | Männlich                       | 18                                                                       | 34.0% | 21             | 39.6% | 8               | 15.1% | 5           | 9.4%   | 1                        | 1.9%  | 53  | 26.0%  |
|                                                                          | Keine Angabe                   |                                                                          |       |                |       |                 |       | 2           | 100.0% |                          |       | 2   | 1.0%   |
| Altersgruppe:                                                            | bis 30 Jahre                   | 16                                                                       | 48.5% | 16             | 48.5% | 1               | 3.0%  |             |        |                          |       | 33  | 16.2%  |
|                                                                          | 31 – 40 Jahre                  | 18                                                                       | 33.3% | 22             | 40.7% | 7               | 13.0% | 5           | 9.3%   | 2                        | 3.7%  | 54  | 26.5%  |
|                                                                          | 41 – 45 Jahre                  | 13                                                                       | 36.1% | 12             | 33.3% | 5               | 13.9% | 6           | 16.7%  |                          |       | 36  | 17.6%  |
|                                                                          | über 45 Jahre                  | 20                                                                       | 25.3% | 28             | 35.4% | 13              | 16.5% | 17          | 21.5%  | 1                        | 1.3%  | 79  | 38.7%  |
|                                                                          | Keine Angabe                   |                                                                          |       |                |       |                 |       | 2           | 100.0% |                          |       | 2   | 1.0%   |
| höchste Berufsbildung:                                                   | Obligatorische Schule/Anlehre  | 7                                                                        | 46.7% | 4              | 26.7% | 1               | 6.7%  | 3           | 20.0%  |                          |       | 15  | 7.4%   |
|                                                                          | Berufslehre/ - schule          | 31                                                                       | 32.6% | 38             | 40.0% | 11              | 11.6% | 14          | 14.7%  | 1                        | 1.1%  | 95  | 46.6%  |
|                                                                          | Höhere Fach- und Berufsbildung | 17                                                                       | 28.8% | 23             | 39.0% | 12              | 20.3% | 6           | 10.2%  | 1                        | 1.7%  | 59  | 28.9%  |
|                                                                          | Universität / Fachhochschule   | 11                                                                       | 34.4% | 13             | 40.6% | 2               | 6.3%  | 5           | 15.6%  | 1                        | 3.1%  | 32  | 15.7%  |
|                                                                          | Keine Angabe                   | 1                                                                        | 33.3% |                |       |                 |       | 2           | 66.7%  |                          |       | 3   | 1.5%   |
| Form der MS:                                                             | CIS                            | 4                                                                        | 80.0% | 1              | 20.0% |                 |       |             |        |                          |       | 5   | 2.5%   |
|                                                                          | RRMS                           | 59                                                                       | 32.2% | 75             | 41.0% | 23              | 12.6% | 24          | 13.1%  | 2                        | 1.1%  | 183 | 89.7%  |
|                                                                          | SPMS                           | 3                                                                        | 21.4% | 2              | 14.3% | 3               | 21.4% | 5           | 35.7%  | 1                        | 7.1%  | 14  | 6.9%   |
|                                                                          | Keine Angabe                   | 1                                                                        | 50.0% |                |       |                 |       | 1           | 50.0%  |                          |       | 2   | 1.0%   |
| Dauer seit der Diagnose:                                                 | < 12 Monate                    | 9                                                                        | 56.3% | 5              | 31.3% | 1               | 6.3%  |             |        | 1                        | 6.3%  | 16  | 7.8%   |
|                                                                          | 1 – 3 Jahre                    | 11                                                                       | 37.9% | 15             | 51.7% | 2               | 6.9%  | 1           | 3.4%   |                          |       | 29  | 14.2%  |
|                                                                          | 3 – 5 Jahre                    | 9                                                                        | 32.1% | 18             | 64.3% |                 |       | 1           | 3.6%   |                          |       | 28  | 13.7%  |
|                                                                          | 5 – 10 Jahre                   | 15                                                                       | 34.1% | 16             | 36.4% | 8               | 18.2% | 5           | 11.4%  |                          |       | 44  | 21.6%  |
|                                                                          | 10 – 15 Jahre                  | 11                                                                       | 32.4% | 13             | 38.2% | 4               | 11.8% | 5           | 14.7%  | 1                        | 2.9%  | 34  | 16.7%  |
|                                                                          | > 15 Jahre                     | 12                                                                       | 23.1% | 11             | 21.2% | 11              | 21.2% | 17          | 32.7%  | 1                        | 1.9%  | 52  | 25.5%  |
|                                                                          | Keine Angabe                   |                                                                          |       |                |       |                 |       | 1           | 100.0% |                          |       | 1   | 0.5%   |
| Gespräch mit Neurologe bei Diagnose:                                     | sehr gut/gut                   | 39                                                                       | 33.6% | 48             | 41.4% | 16              | 13.8% | 12          | 10.3%  | 1                        | 0.9%  | 116 | 56.9%  |
|                                                                          | mittel                         | 9                                                                        | 37.5% | 7              | 29.2% | 2               | 8.3%  | 6           | 25.0%  |                          |       | 24  | 11.8%  |
|                                                                          | schlecht/sehr schlecht         | 18                                                                       | 30.0% | 21             | 35.0% | 8               | 13.3% | 11          | 18.3%  | 2                        | 3.3%  | 60  | 29.4%  |
|                                                                          | Keine Angabe                   | 1                                                                        | 25.0% | 2              | 50.0% |                 |       | 1           | 25.0%  |                          |       | 4   | 2.0%   |

### 3.18 FRAGE 21: DAUER VON DER DIAGNOSESTELLUNG BIS ZUM THERAPIESTART NACH KEY VARIABLEN II

|                                     |                    | 21. Wie lange dauerte es von der Diagnosestellung bis zum Therapiestart? |       |                |        |                 |       |             |       |                          |       | Total |        |
|-------------------------------------|--------------------|--------------------------------------------------------------------------|-------|----------------|--------|-----------------|-------|-------------|-------|--------------------------|-------|-------|--------|
|                                     |                    | 0 – 4 Wochen                                                             |       | > 1 – 3 Monate |        | > 3 – 12 Monate |       | > 12 Monate |       | Keine Therapie erwünscht |       | N     | col%   |
|                                     |                    | N                                                                        | row%  | N              | row%   | N               | row%  | N           | row%  | N                        | row%  |       |        |
| Total                               |                    | 67                                                                       | 32.8% | 78             | 38.2%  | 26              | 12.7% | 30          | 14.7% | 3                        | 1.5%  | 204   | 100.0% |
| Zweitmeinung bei Diagnose:          | ja                 | 6                                                                        | 14.6% | 17             | 41.5%  | 8               | 19.5% | 10          | 24.4% |                          |       | 41    | 20.1%  |
|                                     | nein               | 56                                                                       | 36.8% | 58             | 38.2%  | 18              | 11.8% | 20          | 13.2% |                          |       | 152   | 74.5%  |
|                                     | Keine Angabe       | 5                                                                        | 45.5% | 3              | 27.3%  |                 |       |             |       | 3                        | 27.3% | 11    | 5.4%   |
|                                     |                    |                                                                          |       |                |        |                 |       |             |       |                          |       |       |        |
| Therapieentscheid bei Erstdiagnose: | Aubagio            | 2                                                                        | 50.0% | 1              | 25.0%  |                 |       | 1           | 25.0% |                          |       | 4     | 2.0%   |
|                                     | Injizierbare       | 45                                                                       | 31.3% | 55             | 38.2%  | 21              | 14.6% | 23          | 16.0% |                          |       | 144   | 70.6%  |
|                                     | Gilenya            | 8                                                                        | 36.4% | 10             | 45.5%  | 3               | 13.6% | 1           | 4.5%  |                          |       | 22    | 10.8%  |
|                                     | Tecfidera          | 5                                                                        | 35.7% | 7              | 50.0%  | 1               | 7.1%  | 1           | 7.1%  |                          |       | 14    | 6.9%   |
|                                     | Tysabri            | 4                                                                        | 44.4% | 2              | 22.2%  |                 |       | 3           | 33.3% |                          |       | 9     | 4.4%   |
|                                     | Andere             | 1                                                                        | 25.0% | 2              | 50.0%  | 1               | 25.0% |             |       |                          |       | 4     | 2.0%   |
|                                     | Keine Angabe       | 2                                                                        | 28.6% | 1              | 14.3%  |                 |       | 1           | 14.3% | 3                        | 42.9% | 7     | 3.4%   |
| Rebif bei Erstdiagnose:             | nein               | 43                                                                       | 29.3% | 56             | 38.1%  | 21              | 14.3% | 24          | 16.3% | 3                        | 2.0%  | 147   | 72.1%  |
|                                     | ja                 | 24                                                                       | 42.1% | 22             | 38.6%  | 5               | 8.8%  | 6           | 10.5% |                          |       | 57    | 27.9%  |
| Aktuelle Behandlung:                | Aubagio            | 5                                                                        | 71.4% | 1              | 14.3%  |                 |       | 1           | 14.3% |                          |       | 7     | 3.4%   |
|                                     | Injizierbare       | 11                                                                       | 28.9% | 12             | 31.6%  | 6               | 15.8% | 9           | 23.7% |                          |       | 38    | 18.6%  |
|                                     | Gilenya            | 19                                                                       | 30.2% | 32             | 50.8%  | 6               | 9.5%  | 6           | 9.5%  |                          |       | 63    | 30.9%  |
|                                     | Tecfidera          | 7                                                                        | 36.8% | 5              | 26.3%  | 2               | 10.5% | 5           | 26.3% |                          |       | 19    | 9.3%   |
|                                     | Tysabri            | 20                                                                       | 37.0% | 18             | 33.3%  | 9               | 16.7% | 6           | 11.1% | 1                        | 1.9%  | 54    | 26.5%  |
|                                     | Andere             | 1                                                                        | 33.3% | 1              | 33.3%  |                 |       |             |       | 1                        | 33.3% | 3     | 1.5%   |
|                                     | keine Therapie     | 4                                                                        | 22.2% | 7              | 38.9%  | 3               | 16.7% | 3           | 16.7% | 1                        | 5.6%  | 18    | 8.8%   |
|                                     | Keine Angabe       |                                                                          |       | 2              | 100.0% |                 |       |             |       |                          |       | 2     | 1.0%   |
| Rebif ist aktuelle Behandlung:      | nein               | 62                                                                       | 32.3% | 73             | 38.0%  | 26              | 13.5% | 28          | 14.6% | 3                        | 1.6%  | 192   | 94.1%  |
|                                     | ja                 | 5                                                                        | 41.7% | 5              | 41.7%  |                 |       | 2           | 16.7% |                          |       | 12    | 5.9%   |
| Anzahl MS Langzeit-Therapien:       | Erste MS Therapie  | 21                                                                       | 36.8% | 22             | 38.6%  | 5               | 8.8%  | 7           | 12.3% | 2                        | 3.5%  | 57    | 27.9%  |
|                                     | Zweite MS Therapie | 22                                                                       | 27.2% | 35             | 43.2%  | 13              | 16.0% | 11          | 13.6% |                          |       | 81    | 39.7%  |
|                                     | Dritte oder mehr   | 19                                                                       | 42.2% | 14             | 31.1%  | 5               | 11.1% | 7           | 15.6% |                          |       | 45    | 22.1%  |
|                                     | Keine Angabe       | 5                                                                        | 23.8% | 7              | 33.3%  | 3               | 14.3% | 5           | 23.8% | 1                        | 4.8%  | 21    | 10.3%  |
| Rückblickend gleiche Therapie:      | ja                 | 36                                                                       | 29.5% | 49             | 40.2%  | 18              | 14.8% | 19          | 15.6% |                          |       | 122   | 59.8%  |
|                                     | nein               | 20                                                                       | 37.0% | 21             | 38.9%  | 5               | 9.3%  | 8           | 14.8% |                          |       | 54    | 26.5%  |
|                                     | Keine Angabe       | 11                                                                       | 39.3% | 8              | 28.6%  | 3               | 10.7% | 3           | 10.7% | 3                        | 10.7% | 28    | 13.7%  |

### 3.19 FRAGE 22: GRÜNDE FÜR KEINE MS-LANGZEITTHERAPIE

| (Mehrfachnennungen)                                                       | Geschlecht: |        |          |        | Total |        |
|---------------------------------------------------------------------------|-------------|--------|----------|--------|-------|--------|
|                                                                           | Weiblich    |        | Männlich |        | N     | col%   |
|                                                                           | N           | col%   | N        | col%   |       |        |
| Total                                                                     | 2           | 100.0% | 1        | 100.0% | 3     | 100.0% |
| Warum haben Sie sich<br>gegen eine MS<br>Langzeittherapie<br>entschieden? |             |        |          |        |       |        |
| Nebenwirkungen                                                            |             |        | 1        | 100.0% | 1     | 33.3%  |
| Anwendung                                                                 |             |        | 1        | 100.0% | 1     | 33.3%  |
| Mangelndes Vertrauen in<br>die Wirksamkeit                                |             |        | 1        | 100.0% | 1     | 33.3%  |
| Kinderwunsch                                                              | 1           | 50.0%  |          |        | 1     | 33.3%  |
| Andere Kriterien                                                          | 1           | 50.0%  |          |        | 1     | 33.3%  |

**3.20 FRAGE 23: THERAPIEENTSCHEID BEI ERSTDIAGNOSE NACH KEY VARIABLEN I**

|                                      |                                   | Therapieentscheid bei Erstdiagnose: |        |              |        |         |        |           |        |         |        |        |        |              |        | Total |        |
|--------------------------------------|-----------------------------------|-------------------------------------|--------|--------------|--------|---------|--------|-----------|--------|---------|--------|--------|--------|--------------|--------|-------|--------|
|                                      |                                   | Aubagio                             |        | Injizierbare |        | Gilenya |        | Tecfidera |        | Tysabri |        | Andere |        | Keine Angabe |        | N     | col%   |
|                                      |                                   | N                                   | col%   | N            | col%   | N       | col%   | N         | col%   | N       | col%   | N      | col%   | N            | col%   |       |        |
| Total                                |                                   | 4                                   | 100.0% | 144          | 100.0% | 22      | 100.0% | 14        | 100.0% | 9       | 100.0% | 4      | 100.0% | 4            | 100.0% | 201   | 100.0% |
| Geschlecht:                          | Weiblich                          | 3                                   | 75.0%  | 108          | 75.0%  | 15      | 68.2%  | 11        | 78.6%  | 7       | 77.8%  | 2      | 50.0%  | 1            | 25.0%  | 147   | 73.1%  |
|                                      | Männlich                          | 1                                   | 25.0%  | 35           | 24.3%  | 7       | 31.8%  | 3         | 21.4%  | 1       | 11.1%  | 2      | 50.0%  | 3            | 75.0%  | 52    | 25.9%  |
|                                      | Keine Angabe                      |                                     |        | 1            | 0.7%   |         |        |           |        | 1       | 11.1%  |        |        |              |        | 2     | 1.0%   |
| Altersgruppe:                        | bis 30 Jahre                      |                                     |        | 18           | 12.5%  | 6       | 27.3%  | 7         | 50.0%  | 1       | 11.1%  | 1      | 25.0%  |              |        | 33    | 16.4%  |
|                                      | 31 – 40 Jahre                     |                                     |        | 34           | 23.6%  | 10      | 45.5%  | 4         | 28.6%  | 2       | 22.2%  | 1      | 25.0%  | 1            | 25.0%  | 52    | 25.9%  |
|                                      | 41 – 45 Jahre                     | 1                                   | 25.0%  | 25           | 17.4%  | 4       | 18.2%  | 3         | 21.4%  | 2       | 22.2%  |        |        | 1            | 25.0%  | 36    | 17.9%  |
|                                      | über 45 Jahre                     | 3                                   | 75.0%  | 66           | 45.8%  | 2       | 9.1%   |           |        | 3       | 33.3%  | 2      | 50.0%  | 2            | 50.0%  | 78    | 38.8%  |
|                                      | Keine Angabe                      |                                     |        | 1            | 0.7%   |         |        |           |        | 1       | 11.1%  |        |        |              |        | 2     | 1.0%   |
| höchste Berufsausbildung:            | Obligatorische Schule/Anlehre     | 2                                   | 50.0%  | 9            | 6.3%   | 2       | 9.1%   |           |        | 2       | 22.2%  |        |        |              |        | 15    | 7.5%   |
|                                      | Berufslehre/ - schule             | 2                                   | 50.0%  | 72           | 50.0%  | 8       | 36.4%  | 6         | 42.9%  | 3       | 33.3%  | 1      | 25.0%  | 2            | 50.0%  | 94    | 46.8%  |
|                                      | Höhere Fach- und Berufsausbildung |                                     |        | 45           | 31.3%  | 6       | 27.3%  | 3         | 21.4%  |         |        | 2      | 50.0%  | 2            | 50.0%  | 58    | 28.9%  |
|                                      | Universität / Fachhochschule      |                                     |        | 16           | 11.1%  | 6       | 27.3%  | 5         | 35.7%  | 3       | 33.3%  | 1      | 25.0%  |              |        | 31    | 15.4%  |
|                                      | Keine Angabe                      |                                     |        | 2            | 1.4%   |         |        |           |        | 1       | 11.1%  |        |        |              |        | 3     | 1.5%   |
| Form der MS:                         | CIS                               |                                     |        | 5            | 3.5%   |         |        |           |        |         |        |        |        |              |        | 5     | 2.5%   |
|                                      | RRMS                              | 3                                   | 75.0%  | 128          | 88.9%  | 21      | 95.5%  | 14        | 100.0% | 9       | 100.0% | 3      | 75.0%  | 3            | 75.0%  | 181   | 90.0%  |
|                                      | SPMS                              | 1                                   | 25.0%  | 10           | 6.9%   |         |        |           |        |         |        | 1      | 25.0%  | 1            | 25.0%  | 13    | 6.5%   |
|                                      | Keine Angabe                      |                                     |        | 1            | 0.7%   | 1       | 4.5%   |           |        |         |        |        |        |              |        | 2     | 1.0%   |
| Dauer seit der Diagnose:             | < 12 Monate                       |                                     |        | 6            | 4.2%   | 1       | 4.5%   | 3         | 21.4%  | 1       | 11.1%  | 3      | 75.0%  | 1            | 25.0%  | 15    | 7.5%   |
|                                      | 1 – 3 Jahre                       | 3                                   | 75.0%  | 8            | 5.6%   | 9       | 40.9%  | 8         | 57.1%  | 1       | 11.1%  |        |        |              |        | 29    | 14.4%  |
|                                      | 3 – 5 Jahre                       | 1                                   | 25.0%  | 15           | 10.4%  | 8       | 36.4%  | 1         | 7.1%   | 3       | 33.3%  |        |        |              |        | 28    | 13.9%  |
|                                      | 5 – 10 Jahre                      |                                     |        | 39           | 27.1%  | 3       | 13.6%  | 1         | 7.1%   | 1       | 11.1%  |        |        |              |        | 44    | 21.9%  |
|                                      | 10 – 15 Jahre                     |                                     |        | 30           | 20.8%  | 1       | 4.5%   | 1         | 7.1%   | 1       | 11.1%  |        |        |              |        | 33    | 16.4%  |
|                                      | > 15 Jahre                        |                                     |        | 45           | 31.3%  |         |        |           |        | 2       | 22.2%  | 1      | 25.0%  | 3            | 75.0%  | 51    | 25.4%  |
|                                      | Keine Angabe                      |                                     |        | 1            | 0.7%   |         |        |           |        |         |        |        |        |              |        | 1     | 0.5%   |
| Gespräch mit Neurologe bei Diagnose: | sehr gut/gut                      | 4                                   | 100.0% | 71           | 49.3%  | 18      | 81.8%  | 9         | 64.3%  | 8       | 88.9%  | 2      | 50.0%  | 3            | 75.0%  | 115   | 57.2%  |
|                                      | mittel                            |                                     |        | 20           | 13.9%  | 1       | 4.5%   | 3         | 21.4%  |         |        |        |        |              |        | 24    | 11.9%  |
|                                      | schlecht/sehr schlecht            |                                     |        | 50           | 34.7%  | 3       | 13.6%  | 2         | 14.3%  |         |        | 2      | 50.0%  | 1            | 25.0%  | 58    | 28.9%  |
|                                      | Keine Angabe                      |                                     |        | 3            | 2.1%   |         |        |           |        | 1       | 11.1%  |        |        |              |        | 4     | 2.0%   |

### 3.21 FRAGE 23: THERAPIEENTSCHEID BEI ERSTDIAGNOSE NACH KEY VARIABLEN II

|                                                                                         |                    | Therapieentscheid bei Erstdiagnose: |        |              |        |         |        |           |        |         |        |        |        |              |        | Total |        |
|-----------------------------------------------------------------------------------------|--------------------|-------------------------------------|--------|--------------|--------|---------|--------|-----------|--------|---------|--------|--------|--------|--------------|--------|-------|--------|
|                                                                                         |                    | Aubagio                             |        | Injizierbare |        | Gilenya |        | Tecfidera |        | Tysabri |        | Andere |        | Keine Angabe |        | N     | col%   |
|                                                                                         |                    | N                                   | col%   | N            | col%   | N       | col%   | N         | col%   | N       | col%   | N      | col%   | N            | col%   |       |        |
| Total                                                                                   |                    | 4                                   | 100.0% | 144          | 100.0% | 22      | 100.0% | 14        | 100.0% | 9       | 100.0% | 4      | 100.0% | 4            | 100.0% | 201   | 100.0% |
| Zweitmeinung bei Diagnose:                                                              | ja                 |                                     |        | 32           | 22.2%  | 4       | 18.2%  | 3         | 21.4%  | 1       | 11.1%  | 1      | 25.0%  |              |        | 41    | 20.4%  |
|                                                                                         | nein               | 4                                   | 100.0% | 108          | 75.0%  | 16      | 72.7%  | 11        | 78.6%  | 8       | 88.9%  | 2      | 50.0%  | 3            | 75.0%  | 152   | 75.6%  |
|                                                                                         | Keine Angabe       |                                     |        | 4            | 2.8%   | 2       | 9.1%   |           |        |         |        | 1      | 25.0%  | 1            | 25.0%  | 8     | 4.0%   |
| 23. Für welche MS-Langzeittherapie haben Sie sich nach Ihrer Erst-Diagnose entschieden? | Aubagio            | 4                                   | 100.0% |              |        |         |        |           |        |         |        |        |        |              |        | 4     | 2.0%   |
|                                                                                         | Avonex             |                                     |        | 19           | 13.2%  |         |        |           |        |         |        |        |        |              |        | 19    | 9.5%   |
|                                                                                         | Betaferon          |                                     |        | 44           | 30.6%  |         |        |           |        |         |        |        |        |              |        | 44    | 21.9%  |
|                                                                                         | Copaxone           |                                     |        | 21           | 14.6%  |         |        |           |        |         |        |        |        |              |        | 21    | 10.4%  |
|                                                                                         | Gilenya            |                                     |        |              |        | 22      | 100.0% |           |        |         |        |        |        |              |        | 22    | 10.9%  |
|                                                                                         | Plegridy           |                                     |        | 3            | 2.1%   |         |        |           |        |         |        |        |        |              |        | 3     | 1.5%   |
|                                                                                         | Rebif              |                                     |        | 57           | 39.6%  |         |        |           |        |         |        |        |        |              |        | 57    | 28.4%  |
|                                                                                         | Tecfidera          |                                     |        |              |        |         |        | 14        | 100.0% |         |        |        |        |              |        | 14    | 7.0%   |
|                                                                                         | Tysabri            |                                     |        |              |        |         |        |           | 9      | 100.0%  |        |        |        |              |        | 9     | 4.5%   |
|                                                                                         | Andere             |                                     |        |              |        |         |        |           |        |         | 4      | 100.0% |        |              |        | 4     | 2.0%   |
|                                                                                         | Keine Angabe       |                                     |        |              |        |         |        |           |        |         |        |        | 4      | 100.0%       | 4      | 2.0%  |        |
| Rebif bei Erstdiagnose:                                                                 | nein               | 4                                   | 100.0% | 87           | 60.4%  | 22      | 100.0% | 14        | 100.0% | 9       | 100.0% | 4      | 100.0% | 4            | 100.0% | 144   | 71.6%  |
|                                                                                         | ja                 |                                     |        | 57           | 39.6%  |         |        |           |        |         |        |        |        |              |        | 57    | 28.4%  |
| Aktuelle Behandlung:                                                                    | Aubagio            | 4                                   | 100.0% | 2            | 1.4%   |         |        |           |        |         |        |        |        | 1            | 25.0%  | 7     | 3.5%   |
|                                                                                         | Injizierbare       |                                     |        | 36           | 25.0%  | 1       | 4.5%   |           |        |         |        |        |        | 1            | 25.0%  | 38    | 18.9%  |
|                                                                                         | Gilenya            |                                     |        | 40           | 27.8%  | 18      | 81.8%  | 4         | 28.6%  |         |        | 1      | 25.0%  |              |        | 63    | 31.3%  |
|                                                                                         | Tecfidera          |                                     |        | 14           | 9.7%   |         |        | 5         | 35.7%  |         |        |        |        |              |        | 19    | 9.5%   |
|                                                                                         | Tysabri            |                                     |        | 37           | 25.7%  | 2       | 9.1%   | 4         | 28.6%  | 9       | 100.0% |        |        | 1            | 25.0%  | 53    | 26.4%  |
|                                                                                         | Andere             |                                     |        | 2            | 1.4%   |         |        |           |        |         |        |        |        |              |        | 2     | 1.0%   |
|                                                                                         | keine Therapie     |                                     |        | 12           | 8.3%   | 1       | 4.5%   | 1         | 7.1%   |         |        | 2      | 50.0%  | 1            | 25.0%  | 17    | 8.5%   |
|                                                                                         | Keine Angabe       |                                     |        | 1            | 0.7%   |         |        |           |        |         |        | 1      | 25.0%  |              |        | 2     | 1.0%   |
| Rebif ist aktuelle Behandlung:                                                          | nein               | 4                                   | 100.0% | 132          | 91.7%  | 22      | 100.0% | 14        | 100.0% | 9       | 100.0% | 4      | 100.0% | 4            | 100.0% | 189   | 94.0%  |
|                                                                                         | ja                 |                                     |        | 12           | 8.3%   |         |        |           |        |         |        |        |        |              |        | 12    | 6.0%   |
| Anzahl MS Langzeit-Therapien:                                                           | Erste MS Therapie  | 4                                   | 100.0% | 25           | 17.4%  | 14      | 63.6%  | 5         | 35.7%  | 5       | 55.6%  | 2      | 50.0%  |              |        | 55    | 27.4%  |
|                                                                                         | Zweite MS Therapie |                                     |        | 65           | 45.1%  | 5       | 22.7%  | 8         | 57.1%  | 2       | 22.2%  |        |        | 1            | 25.0%  | 81    | 40.3%  |
|                                                                                         | Dritte oder mehr   |                                     |        | 40           | 27.8%  | 2       | 9.1%   |           |        | 1       | 11.1%  |        |        | 2            | 50.0%  | 45    | 22.4%  |
|                                                                                         | Keine Angabe       |                                     |        | 14           | 9.7%   | 1       | 4.5%   | 1         | 7.1%   | 1       | 11.1%  | 2      | 50.0%  | 1            | 25.0%  | 20    | 10.0%  |
| Rückblickend gleiche Therapie:                                                          | ja                 | 4                                   | 100.0% | 81           | 56.3%  | 18      | 81.8%  | 7         | 50.0%  | 8       | 88.9%  | 2      | 50.0%  | 2            | 50.0%  | 122   | 60.7%  |
|                                                                                         | nein               |                                     |        | 43           | 29.9%  | 1       | 4.5%   | 7         | 50.0%  | 1       | 11.1%  | 1      | 25.0%  | 1            | 25.0%  | 54    | 26.9%  |
|                                                                                         | Keine Angabe       |                                     |        | 20           | 13.9%  | 3       | 13.6%  |           |        |         |        | 1      | 25.0%  | 1            | 25.0%  | 25    | 12.4%  |

### 3.24 FRAGE 24: WELCHE FAKTOREN HABEN SIE BEWOGEN DIESE THERAPIE ANZUWENDEN?

1 = niedriger Stellenwert - 5 = sehr hoher Stellenwert

|                                            | Auswertbare Fragebogen |      |                    |        |         |               |               |         |
|--------------------------------------------|------------------------|------|--------------------|--------|---------|---------------|---------------|---------|
|                                            | ja                     |      |                    |        |         |               |               |         |
|                                            | Valid N                | Mean | Standard Deviation | Median | Minimum | Percentile 25 | Percentile 75 | Maximum |
| Schubfreiheit                              | 178                    | 4.8  | 0.6                | 5.0    | 1.0     | 5.0           | 5.0           | 5.0     |
| Verzögerung der Behinderungszunahme        | 182                    | 4.7  | 0.7                | 5.0    | 1.0     | 5.0           | 5.0           | 5.0     |
| Wirksamkeit                                | 168                    | 4.7  | 0.8                | 5.0    | 1.0     | 5.0           | 5.0           | 5.0     |
| Kinder/Familienplanung                     | 147                    | 2.6  | 1.7                | 2.0    | 1.0     | 1.0           | 5.0           | 5.0     |
| Arbeit                                     | 154                    | 4.0  | 1.3                | 5.0    | 1.0     | 3.0           | 5.0           | 5.0     |
| Partnerschaft                              | 155                    | 4.1  | 1.3                | 5.0    | 1.0     | 3.0           | 5.0           | 5.0     |
| Unabhängigkeit                             | 163                    | 4.6  | 0.9                | 5.0    | 1.0     | 4.0           | 5.0           | 5.0     |
| Das Langzeitsicherheitsprofil der Therapie | 167                    | 4.3  | 1.0                | 5.0    | 1.0     | 4.0           | 5.0           | 5.0     |
| Die Art der Anwendung                      | 163                    | 3.4  | 1.5                | 4.0    | 1.0     | 2.0           | 5.0           | 5.0     |
| Die Häufigkeit der Therapieanwendung       | 157                    | 3.4  | 1.5                | 3.0    | 1.0     | 2.0           | 5.0           | 5.0     |
| Dokumentierte Langzeitdaten                | 145                    | 3.6  | 1.3                | 4.0    | 1.0     | 3.0           | 5.0           | 5.0     |
| Verträglichkeit                            | 165                    | 4.1  | 1.2                | 5.0    | 1.0     | 3.0           | 5.0           | 5.0     |
| Andere                                     | 23                     | 3.7  | 1.7                | 5.0    | 1.0     | 2.0           | 5.0           | 5.0     |

### 3.25 FRAGE 25: ROLLE DER THERAPIEBEGLEITUNG BEIM THERAPIESTART NACH KEY VARIABLEN I

| 1 = keine Rolle - 5 = sehr wichtige Rolle |                                   | 25. Welche Rolle hatte Ihre Therapiebegleitung (z.B. MS Nurse/MS Pflegefachperson) beim Therapiestart? |       |    |       |    |        |    |       |    |       |                          |       | Total |        |
|-------------------------------------------|-----------------------------------|--------------------------------------------------------------------------------------------------------|-------|----|-------|----|--------|----|-------|----|-------|--------------------------|-------|-------|--------|
|                                           |                                   | 1                                                                                                      |       | 2  |       | 3  |        | 4  |       | 5  |       | Keine Therapiebegleitung |       | N     | col%   |
|                                           |                                   | N                                                                                                      | row%  | N  | row%  | N  | row%   | N  | row%  | N  | row%  | N                        | row%  |       |        |
| Total                                     |                                   | 22                                                                                                     | 11.2% | 17 | 8.7%  | 26 | 13.3%  | 34 | 17.3% | 55 | 28.1% | 42                       | 21.4% | 196   | 100.0% |
| Geschlecht:                               | Weiblich                          | 13                                                                                                     | 9.0%  | 14 | 9.7%  | 18 | 12.4%  | 27 | 18.6% | 43 | 29.7% | 30                       | 20.7% | 145   | 74.0%  |
|                                           | Männlich                          | 9                                                                                                      | 18.4% | 3  | 6.1%  | 7  | 14.3%  | 7  | 14.3% | 12 | 24.5% | 11                       | 22.4% | 49    | 25.0%  |
|                                           | Keine Angabe                      |                                                                                                        |       |    |       | 1  | 50.0%  |    |       |    |       | 1                        | 50.0% | 2     | 1.0%   |
|                                           |                                   |                                                                                                        |       |    |       |    |        |    |       |    |       |                          |       |       |        |
| Altersgruppe:                             | bis 30 Jahre                      | 3                                                                                                      | 9.7%  | 1  | 3.2%  | 5  | 16.1%  | 8  | 25.8% | 7  | 22.6% | 7                        | 22.6% | 31    | 15.8%  |
|                                           | 31 – 40 Jahre                     | 7                                                                                                      | 14.3% | 9  | 18.4% | 6  | 12.2%  | 4  | 8.2%  | 14 | 28.6% | 9                        | 18.4% | 49    | 25.0%  |
|                                           | 41 – 45 Jahre                     | 5                                                                                                      | 14.7% | 2  | 5.9%  | 5  | 14.7%  | 9  | 26.5% | 9  | 26.5% | 4                        | 11.8% | 34    | 17.3%  |
|                                           | über 45 Jahre                     | 7                                                                                                      | 8.8%  | 5  | 6.3%  | 9  | 11.3%  | 13 | 16.3% | 25 | 31.3% | 21                       | 26.3% | 80    | 40.8%  |
|                                           | Keine Angabe                      |                                                                                                        |       |    |       | 1  | 50.0%  |    |       |    |       | 1                        | 50.0% | 2     | 1.0%   |
| höchste Berufsausbildung:                 | Obligatorische Schule/Anlehre     | 2                                                                                                      | 11.8% | 1  | 5.9%  | 3  | 17.6%  | 4  | 23.5% | 7  | 41.2% |                          |       | 17    | 8.7%   |
|                                           | Berufslehre/ - schule             | 9                                                                                                      | 10.5% | 6  | 7.0%  | 9  | 10.5%  | 13 | 15.1% | 27 | 31.4% | 22                       | 25.6% | 86    | 43.9%  |
|                                           | Höhere Fach- und Berufsausbildung | 8                                                                                                      | 14.0% | 5  | 8.8%  | 6  | 10.5%  | 12 | 21.1% | 17 | 29.8% | 9                        | 15.8% | 57    | 29.1%  |
|                                           | Universität / Fachhochschule      | 3                                                                                                      | 9.1%  | 5  | 15.2% | 7  | 21.2%  | 5  | 15.2% | 3  | 9.1%  | 10                       | 30.3% | 33    | 16.8%  |
|                                           | Keine Angabe                      |                                                                                                        |       |    |       | 1  | 33.3%  |    |       | 1  | 33.3% | 1                        | 33.3% | 3     | 1.5%   |
| Form der MS:                              | CIS                               |                                                                                                        |       |    |       |    |        | 1  | 20.0% | 2  | 40.0% | 2                        | 40.0% | 5     | 2.6%   |
|                                           | RRMS                              | 19                                                                                                     | 10.8% | 16 | 9.1%  | 23 | 13.1%  | 33 | 18.8% | 49 | 27.8% | 36                       | 20.5% | 176   | 89.8%  |
|                                           | SPMS                              | 3                                                                                                      | 23.1% | 1  | 7.7%  | 1  | 7.7%   |    |       | 4  | 30.8% | 4                        | 30.8% | 13    | 6.6%   |
|                                           | Keine Angabe                      |                                                                                                        |       |    |       | 2  | 100.0% |    |       |    |       |                          |       | 2     | 1.0%   |
| Dauer seit der Diagnose:                  | < 12 Monate                       | 1                                                                                                      | 7.1%  | 1  | 7.1%  | 2  | 14.3%  | 4  | 28.6% | 1  | 7.1%  | 5                        | 35.7% | 14    | 7.1%   |
|                                           | 1 – 3 Jahre                       | 3                                                                                                      | 10.7% | 2  | 7.1%  | 5  | 17.9%  | 3  | 10.7% | 7  | 25.0% | 8                        | 28.6% | 28    | 14.3%  |
|                                           | 3 – 5 Jahre                       | 3                                                                                                      | 11.5% | 2  | 7.7%  | 3  | 11.5%  | 5  | 19.2% | 8  | 30.8% | 5                        | 19.2% | 26    | 13.3%  |
|                                           | 5 – 10 Jahre                      | 8                                                                                                      | 18.2% | 3  | 6.8%  | 8  | 18.2%  | 8  | 18.2% | 10 | 22.7% | 7                        | 15.9% | 44    | 22.4%  |
|                                           | 10 – 15 Jahre                     | 3                                                                                                      | 9.1%  | 4  | 12.1% | 3  | 9.1%   | 6  | 18.2% | 12 | 36.4% | 5                        | 15.2% | 33    | 16.8%  |
|                                           | > 15 Jahre                        | 4                                                                                                      | 8.0%  | 5  | 10.0% | 4  | 8.0%   | 8  | 16.0% | 17 | 34.0% | 12                       | 24.0% | 50    | 25.5%  |
|                                           | Keine Angabe                      |                                                                                                        |       |    |       | 1  | 100.0% |    |       |    |       |                          |       | 1     | 0.5%   |
| Gespräch mit Neurologe bei Diagnose:      | sehr gut/gut                      | 16                                                                                                     | 14.5% | 9  | 8.2%  | 15 | 13.6%  | 19 | 17.3% | 29 | 26.4% | 22                       | 20.0% | 110   | 56.1%  |
|                                           | mittel                            | 1                                                                                                      | 4.2%  | 3  | 12.5% | 4  | 16.7%  | 3  | 12.5% | 8  | 33.3% | 5                        | 20.8% | 24    | 12.2%  |
|                                           | schlecht/sehr schlecht            | 5                                                                                                      | 8.6%  | 5  | 8.6%  | 7  | 12.1%  | 11 | 19.0% | 15 | 25.9% | 15                       | 25.9% | 58    | 29.6%  |
|                                           | Keine Angabe                      |                                                                                                        |       |    |       |    |        | 1  | 25.0% | 3  | 75.0% |                          |       | 4     | 2.0%   |

### 3.26 FRAGE 25: ROLLE DER THERAPIEBEGLEITUNG BEIM THERAPIESTART NACH KEY VARIABLEN II

|                                           |                    | 25. Welche Rolle hatte Ihre Therapiebegleitung (z.B. MS Nurse/MS Pflegefachperson) beim Therapiestart? |       |    |       |    |       |    |       |    |        |                          |       | Total |        |
|-------------------------------------------|--------------------|--------------------------------------------------------------------------------------------------------|-------|----|-------|----|-------|----|-------|----|--------|--------------------------|-------|-------|--------|
|                                           |                    | 1                                                                                                      |       | 2  |       | 3  |       | 4  |       | 5  |        | Keine Therapiebegleitung |       | N     | col%   |
|                                           |                    | N                                                                                                      | row%  | N  | row%  | N  | row%  | N  | row%  | N  | row%   | N                        | row%  |       |        |
| 1 = keine Rolle - 5 = sehr wichtige Rolle |                    | N                                                                                                      | row%  | N  | row%  | N  | row%  | N  | row%  | N  | row%   | N                        | row%  | N     | col%   |
| Total                                     |                    | 22                                                                                                     | 11.2% | 17 | 8.7%  | 26 | 13.3% | 34 | 17.3% | 55 | 28.1%  | 42                       | 21.4% | 196   | 100.0% |
| Zweitmeinung bei Diagnose:                | ja                 | 4                                                                                                      | 9.8%  | 4  | 9.8%  | 5  | 12.2% | 6  | 14.6% | 12 | 29.3%  | 10                       | 24.4% | 41    | 20.9%  |
|                                           | nein               | 18                                                                                                     | 11.8% | 13 | 8.5%  | 21 | 13.7% | 28 | 18.3% | 41 | 26.8%  | 32                       | 20.9% | 153   | 78.1%  |
|                                           | Keine Angabe       |                                                                                                        |       |    |       |    |       |    |       | 2  | 100.0% |                          |       | 2     | 1.0%   |
| Therapieentscheid bei Erstdiagnose:       | Aubagio            |                                                                                                        |       |    |       |    |       | 1  | 25.0% | 2  | 50.0%  | 1                        | 25.0% | 4     | 2.0%   |
|                                           | Injizierbare       | 13                                                                                                     | 8.9%  | 12 | 8.2%  | 21 | 14.4% | 27 | 18.5% | 47 | 32.2%  | 26                       | 17.8% | 146   | 74.5%  |
|                                           | Gilenya            | 5                                                                                                      | 25.0% | 2  | 10.0% | 2  | 10.0% | 3  | 15.0% | 1  | 5.0%   | 7                        | 35.0% | 20    | 10.2%  |
|                                           | Tecfidera          | 3                                                                                                      | 23.1% | 2  | 15.4% | 2  | 15.4% | 1  | 7.7%  |    |        | 5                        | 38.5% | 13    | 6.6%   |
|                                           | Tysabri            | 1                                                                                                      | 12.5% |    |       | 1  | 12.5% | 2  | 25.0% | 3  | 37.5%  | 1                        | 12.5% | 8     | 4.1%   |
|                                           | Andere             |                                                                                                        |       | 1  | 33.3% |    |       |    |       | 1  | 33.3%  | 1                        | 33.3% | 3     | 1.5%   |
|                                           | Keine Angabe       |                                                                                                        |       |    |       |    |       |    |       | 1  | 50.0%  | 1                        | 50.0% | 2     | 1.0%   |
| Rebif bei Erstdiagnose:                   | nein               | 17                                                                                                     | 12.3% | 12 | 8.7%  | 19 | 13.8% | 21 | 15.2% | 39 | 28.3%  | 30                       | 21.7% | 138   | 70.4%  |
|                                           | ja                 | 5                                                                                                      | 8.6%  | 5  | 8.6%  | 7  | 12.1% | 13 | 22.4% | 16 | 27.6%  | 12                       | 20.7% | 58    | 29.6%  |
| Aktuelle Behandlung:                      | Aubagio            |                                                                                                        |       | 1  | 14.3% | 1  | 14.3% | 1  | 14.3% | 2  | 28.6%  | 2                        | 28.6% | 7     | 3.6%   |
|                                           | Injizierbare       | 1                                                                                                      | 2.7%  | 4  | 10.8% | 8  | 21.6% | 7  | 18.9% | 9  | 24.3%  | 8                        | 21.6% | 37    | 18.9%  |
|                                           | Gilenya            | 13                                                                                                     | 21.3% | 9  | 14.8% | 4  | 6.6%  | 13 | 21.3% | 11 | 18.0%  | 11                       | 18.0% | 61    | 31.1%  |
|                                           | Tecfidera          | 1                                                                                                      | 5.3%  | 2  | 10.5% | 4  | 21.1% | 3  | 15.8% | 7  | 36.8%  | 2                        | 10.5% | 19    | 9.7%   |
|                                           | Tysabri            | 5                                                                                                      | 9.6%  |    |       | 7  | 13.5% | 9  | 17.3% | 19 | 36.5%  | 12                       | 23.1% | 52    | 26.5%  |
|                                           | Andere             |                                                                                                        |       |    |       | 1  | 50.0% |    |       | 1  | 50.0%  |                          |       | 2     | 1.0%   |
|                                           | keine Therapie     | 2                                                                                                      | 12.5% | 1  | 6.3%  | 1  | 6.3%  | 1  | 6.3%  | 4  | 25.0%  | 7                        | 43.8% | 16    | 8.2%   |
|                                           | Keine Angabe       |                                                                                                        |       |    |       |    |       |    |       | 2  | 100.0% |                          |       | 2     | 1.0%   |
| Rebif ist aktuelle Behandlung:            | nein               | 22                                                                                                     | 11.9% | 16 | 8.6%  | 23 | 12.4% | 32 | 17.3% | 51 | 27.6%  | 41                       | 22.2% | 185   | 94.4%  |
|                                           | ja                 |                                                                                                        |       | 1  | 9.1%  | 3  | 27.3% | 2  | 18.2% | 4  | 36.4%  | 1                        | 9.1%  | 11    | 5.6%   |
| Anzahl MS Langzeit-Therapien:             | Erste MS Therapie  | 7                                                                                                      | 13.5% | 4  | 7.7%  | 7  | 13.5% | 10 | 19.2% | 11 | 21.2%  | 13                       | 25.0% | 52    | 26.5%  |
|                                           | Zweite MS Therapie | 8                                                                                                      | 9.9%  | 10 | 12.3% | 13 | 16.0% | 11 | 13.6% | 24 | 29.6%  | 15                       | 18.5% | 81    | 41.3%  |
|                                           | Dritte oder mehr   | 5                                                                                                      | 11.1% | 2  | 4.4%  | 5  | 11.1% | 10 | 22.2% | 16 | 35.6%  | 7                        | 15.6% | 45    | 23.0%  |
|                                           | Keine Angabe       | 2                                                                                                      | 11.1% | 1  | 5.6%  | 1  | 5.6%  | 3  | 16.7% | 4  | 22.2%  | 7                        | 38.9% | 18    | 9.2%   |
| Rückblickend gleiche Therapie:            | ja                 | 15                                                                                                     | 12.2% | 12 | 9.8%  | 17 | 13.8% | 20 | 16.3% | 34 | 27.6%  | 25                       | 20.3% | 123   | 62.8%  |
|                                           | nein               | 7                                                                                                      | 13.2% | 4  | 7.5%  | 6  | 11.3% | 11 | 20.8% | 16 | 30.2%  | 9                        | 17.0% | 53    | 27.0%  |
|                                           | Keine Angabe       |                                                                                                        |       | 1  | 5.0%  | 3  | 15.0% | 3  | 15.0% | 5  | 25.0%  | 8                        | 40.0% | 20    | 10.2%  |

### 3.27 FRAGE 26: WIE STARK HABEN MÖGLICHE NEBENWIRKUNGEN BEI MS-THERAPEUTIKA IHRE WAHL FÜR EIN PRÄPARAT BEINFLUSST?

1 = gar nicht - 5 = sehr stark

|                                                          | Auswertbare Fragebogen |      |                    |        |         |               |               |         |
|----------------------------------------------------------|------------------------|------|--------------------|--------|---------|---------------|---------------|---------|
|                                                          | ja                     |      |                    |        |         |               |               |         |
|                                                          | Valid N                | Mean | Standard Deviation | Median | Minimum | Percentile 25 | Percentile 75 | Maximum |
| Herzrhythmusstörungen                                    | 152                    | 2.3  | 1.6                | 1.0    | 1.0     | 1.0           | 3.5           | 5.0     |
| Makulaödem (Schwellung der Netzhaut im Augenhintergrund) | 147                    | 2.3  | 1.6                | 1.0    | 1.0     | 1.0           | 4.0           | 5.0     |
| Reaktion der Einstichstelle bei Injektionen              | 161                    | 2.9  | 1.5                | 3.0    | 1.0     | 1.0           | 4.0           | 5.0     |
| Dünnere werdende Haare                                   | 149                    | 2.3  | 1.6                | 1.0    | 1.0     | 1.0           | 4.0           | 5.0     |
| Infektionen                                              | 158                    | 2.7  | 1.6                | 2.0    | 1.0     | 1.0           | 4.0           | 5.0     |
| Progressive multifokale Leukenzephalopathie (PML)        | 125                    | 2.8  | 1.8                | 3.0    | 1.0     | 1.0           | 5.0           | 5.0     |
| Übelkeit / Erbrechen                                     | 156                    | 2.6  | 1.5                | 2.5    | 1.0     | 1.0           | 4.0           | 5.0     |
| Hautauschlag/Hautrötungen                                | 164                    | 2.8  | 1.5                | 3.0    | 1.0     | 1.0           | 4.0           | 5.0     |
| Lymphopenie                                              | 115                    | 2.2  | 1.5                | 1.0    | 1.0     | 1.0           | 3.0           | 5.0     |
| Müdigkeit                                                | 169                    | 3.1  | 1.5                | 3.0    | 1.0     | 2.0           | 5.0           | 5.0     |
| Grippe-ähnliche-Symptome                                 | 174                    | 3.1  | 1.5                | 3.0    | 1.0     | 2.0           | 5.0           | 5.0     |
| Krebsrisiko                                              | 142                    | 2.7  | 1.7                | 3.0    | 1.0     | 1.0           | 4.0           | 5.0     |
| Verdauungsprobleme                                       | 154                    | 2.6  | 1.5                | 2.0    | 1.0     | 1.0           | 4.0           | 5.0     |
| Datenlage bei Schwangerschaft                            | 104                    | 2.0  | 1.6                | 1.0    | 1.0     | 1.0           | 3.0           | 5.0     |

### 3.28 FRAGE 27: SICHERHEIT BEI DER ENTSCHEIDUNG FÜR DIE THERAPIE NACH KEY VARIABLEN I

| 1 = sehr sicher - 5 = sehr unsicher  |                                   | 27. Wie sicher haben Sie sich gefühlt bei der Entscheidung für Ihre Therapie? |       |    |       |    |       |    |        |    |       | Total |        |
|--------------------------------------|-----------------------------------|-------------------------------------------------------------------------------|-------|----|-------|----|-------|----|--------|----|-------|-------|--------|
|                                      |                                   | 1                                                                             |       | 2  |       | 3  |       | 4  |        | 5  |       | N     | col%   |
|                                      |                                   | N                                                                             | row%  | N  | row%  | N  | row%  | N  | row%   | N  | row%  |       |        |
| Total                                |                                   | 44                                                                            | 22.4% | 40 | 20.4% | 60 | 30.6% | 35 | 17.9%  | 17 | 8.7%  | 196   | 100.0% |
| Geschlecht:                          | Weiblich                          | 34                                                                            | 23.3% | 31 | 21.2% | 40 | 27.4% | 27 | 18.5%  | 14 | 9.6%  | 146   | 74.5%  |
|                                      | Männlich                          | 9                                                                             | 18.8% | 9  | 18.8% | 20 | 41.7% | 7  | 14.6%  | 3  | 6.3%  | 48    | 24.5%  |
|                                      | Keine Angabe                      | 1                                                                             | 50.0% |    |       |    |       | 1  | 50.0%  |    |       | 2     | 1.0%   |
|                                      |                                   |                                                                               |       |    |       |    |       |    |        |    |       |       |        |
| Altersgruppe:                        | bis 30 Jahre                      | 7                                                                             | 21.2% | 5  | 15.2% | 10 | 30.3% | 11 | 33.3%  |    |       | 33    | 16.8%  |
|                                      | 31 – 40 Jahre                     | 9                                                                             | 18.0% | 12 | 24.0% | 12 | 24.0% | 10 | 20.0%  | 7  | 14.0% | 50    | 25.5%  |
|                                      | 41 – 45 Jahre                     | 8                                                                             | 22.9% | 5  | 14.3% | 12 | 34.3% | 6  | 17.1%  | 4  | 11.4% | 35    | 17.9%  |
|                                      | über 45 Jahre                     | 19                                                                            | 25.0% | 18 | 23.7% | 26 | 34.2% | 7  | 9.2%   | 6  | 7.9%  | 76    | 38.8%  |
|                                      | Keine Angabe                      | 1                                                                             | 50.0% |    |       |    |       | 1  | 50.0%  |    |       | 2     | 1.0%   |
| höchste Berufsausbildung:            | Obligatorische Schule/Anlehre     | 2                                                                             | 13.3% | 2  | 13.3% | 5  | 33.3% | 3  | 20.0%  | 3  | 20.0% | 15    | 7.7%   |
|                                      | Berufslehre/ - schule             | 26                                                                            | 28.6% | 15 | 16.5% | 29 | 31.9% | 15 | 16.5%  | 6  | 6.6%  | 91    | 46.4%  |
|                                      | Höhere Fach- und Berufsausbildung | 12                                                                            | 21.8% | 16 | 29.1% | 15 | 27.3% | 8  | 14.5%  | 4  | 7.3%  | 55    | 28.1%  |
|                                      | Universität / Fachhochschule      | 3                                                                             | 9.4%  | 7  | 21.9% | 11 | 34.4% | 7  | 21.9%  | 4  | 12.5% | 32    | 16.3%  |
|                                      | Keine Angabe                      | 1                                                                             | 33.3% |    |       |    |       | 2  | 66.7%  |    |       | 3     | 1.5%   |
| Form der MS:                         | CIS                               | 1                                                                             | 20.0% | 2  | 40.0% |    |       | 2  | 40.0%  |    |       | 5     | 2.6%   |
|                                      | RRMS                              | 41                                                                            | 23.0% | 34 | 19.1% | 54 | 30.3% | 32 | 18.0%  | 17 | 9.6%  | 178   | 90.8%  |
|                                      | SPMS                              | 2                                                                             | 18.2% | 4  | 36.4% | 5  | 45.5% |    |        |    |       | 11    | 5.6%   |
|                                      | Keine Angabe                      |                                                                               |       |    |       | 1  | 50.0% | 1  | 50.0%  |    |       | 2     | 1.0%   |
| Dauer seit der Diagnose:             | < 12 Monate                       | 5                                                                             | 31.3% | 4  | 25.0% | 2  | 12.5% | 5  | 31.3%  |    |       | 16    | 8.2%   |
|                                      | 1 – 3 Jahre                       | 4                                                                             | 14.3% | 7  | 25.0% | 9  | 32.1% | 5  | 17.9%  | 3  | 10.7% | 28    | 14.3%  |
|                                      | 3 – 5 Jahre                       | 5                                                                             | 19.2% | 7  | 26.9% | 9  | 34.6% | 3  | 11.5%  | 2  | 7.7%  | 26    | 13.3%  |
|                                      | 5 – 10 Jahre                      | 11                                                                            | 25.0% | 7  | 15.9% | 13 | 29.5% | 8  | 18.2%  | 5  | 11.4% | 44    | 22.4%  |
|                                      | 10 – 15 Jahre                     | 5                                                                             | 16.1% | 4  | 12.9% | 11 | 35.5% | 7  | 22.6%  | 4  | 12.9% | 31    | 15.8%  |
|                                      | > 15 Jahre                        | 14                                                                            | 28.0% | 11 | 22.0% | 16 | 32.0% | 6  | 12.0%  | 3  | 6.0%  | 50    | 25.5%  |
|                                      | Keine Angabe                      |                                                                               |       |    |       |    |       | 1  | 100.0% |    |       | 1     | 0.5%   |
| Gespräch mit Neurologe bei Diagnose: | sehr gut/gut                      | 36                                                                            | 32.4% | 27 | 24.3% | 27 | 24.3% | 16 | 14.4%  | 5  | 4.5%  | 111   | 56.6%  |
|                                      | mittel                            | 4                                                                             | 16.7% | 5  | 20.8% | 12 | 50.0% | 1  | 4.2%   | 2  | 8.3%  | 24    | 12.2%  |
|                                      | schlecht/sehr schlecht            | 3                                                                             | 5.3%  | 7  | 12.3% | 21 | 36.8% | 18 | 31.6%  | 8  | 14.0% | 57    | 29.1%  |
|                                      | Keine Angabe                      | 1                                                                             | 25.0% | 1  | 25.0% |    |       |    |        | 2  | 50.0% | 4     | 2.0%   |

### 3.29 FRAGE 27: SICHERHEIT BEI DER ENTSCHEIDUNG FÜR DIE THERAPIE NACH KEY VARIABLEN II

| 1 = sehr sicher - 5 = sehr unsicher |                    | 27. Wie sicher haben Sie sich gefühlt bei der Entscheidung für Ihre Therapie? |       |    |       |    |       |    |       |    |       | Total |        |
|-------------------------------------|--------------------|-------------------------------------------------------------------------------|-------|----|-------|----|-------|----|-------|----|-------|-------|--------|
|                                     |                    | 1                                                                             |       | 2  |       | 3  |       | 4  |       | 5  |       | N     | col%   |
|                                     |                    | N                                                                             | row%  | N  | row%  | N  | row%  | N  | row%  | N  | row%  |       |        |
| Total                               |                    | 44                                                                            | 22.4% | 40 | 20.4% | 60 | 30.6% | 35 | 17.9% | 17 | 8.7%  | 196   | 100.0% |
| Zweitmeinung bei                    | ja                 | 8                                                                             | 20.5% | 6  | 15.4% | 12 | 30.8% | 11 | 28.2% | 2  | 5.1%  | 39    | 19.9%  |
| Diagnose:                           | nein               | 35                                                                            | 23.0% | 34 | 22.4% | 47 | 30.9% | 23 | 15.1% | 13 | 8.6%  | 152   | 77.6%  |
|                                     | Keine Angabe       | 1                                                                             | 20.0% |    |       | 1  | 20.0% | 1  | 20.0% | 2  | 40.0% | 5     | 2.6%   |
| Therapieentscheid bei               | Aubagio            | 2                                                                             | 50.0% | 2  | 50.0% |    |       |    |       |    |       | 4     | 2.0%   |
| Erstdiagnose:                       | Injizierbare       | 30                                                                            | 21.1% | 29 | 20.4% | 43 | 30.3% | 28 | 19.7% | 12 | 8.5%  | 142   | 72.4%  |
|                                     | Gilenya            | 6                                                                             | 30.0% | 4  | 20.0% | 7  | 35.0% | 2  | 10.0% | 1  | 5.0%  | 20    | 10.2%  |
|                                     | Tecfidera          | 2                                                                             | 14.3% | 3  | 21.4% | 6  | 42.9% | 2  | 14.3% | 1  | 7.1%  | 14    | 7.1%   |
|                                     | Tysabri            | 2                                                                             | 22.2% | 1  | 11.1% | 3  | 33.3% |    |       | 3  | 33.3% | 9     | 4.6%   |
|                                     | Andere             | 1                                                                             | 25.0% | 1  | 25.0% |    |       | 2  | 50.0% |    |       | 4     | 2.0%   |
|                                     | Keine Angabe       | 1                                                                             | 33.3% |    |       | 1  | 33.3% | 1  | 33.3% |    |       | 3     | 1.5%   |
| Rebif bei                           | nein               | 30                                                                            | 21.0% | 29 | 20.3% | 48 | 33.6% | 26 | 18.2% | 10 | 7.0%  | 143   | 73.0%  |
| Erstdiagnose:                       | ja                 | 14                                                                            | 26.4% | 11 | 20.8% | 12 | 22.6% | 9  | 17.0% | 7  | 13.2% | 53    | 27.0%  |
| Aktuelle Behandlung:                | Aubagio            | 2                                                                             | 28.6% | 2  | 28.6% | 3  | 42.9% |    |       |    |       | 7     | 3.6%   |
|                                     | Injizierbare       | 10                                                                            | 26.3% | 8  | 21.1% | 11 | 28.9% | 5  | 13.2% | 4  | 10.5% | 38    | 19.4%  |
|                                     | Gilenya            | 15                                                                            | 24.6% | 12 | 19.7% | 15 | 24.6% | 16 | 26.2% | 3  | 4.9%  | 61    | 31.1%  |
|                                     | Tecfidera          | 4                                                                             | 22.2% | 6  | 33.3% | 4  | 22.2% | 3  | 16.7% | 1  | 5.6%  | 18    | 9.2%   |
|                                     | Tysabri            | 8                                                                             | 15.4% | 10 | 19.2% | 20 | 38.5% | 7  | 13.5% | 7  | 13.5% | 52    | 26.5%  |
|                                     | Andere             | 1                                                                             | 50.0% |    |       | 1  | 50.0% |    |       |    |       | 2     | 1.0%   |
|                                     | keine Therapie     | 4                                                                             | 25.0% | 1  | 6.3%  | 5  | 31.3% | 4  | 25.0% | 2  | 12.5% | 16    | 8.2%   |
|                                     | Keine Angabe       |                                                                               |       | 1  | 50.0% | 1  | 50.0% |    |       |    |       | 2     | 1.0%   |
| Rebif ist aktuelle                  | nein               | 40                                                                            | 21.7% | 36 | 19.6% | 58 | 31.5% | 35 | 19.0% | 15 | 8.2%  | 184   | 93.9%  |
| Behandlung:                         | ja                 | 4                                                                             | 33.3% | 4  | 33.3% | 2  | 16.7% |    |       | 2  | 16.7% | 12    | 6.1%   |
| Anzahl MS Langzeit-                 | Erste MS Therapie  | 17                                                                            | 30.9% | 14 | 25.5% | 16 | 29.1% | 4  | 7.3%  | 4  | 7.3%  | 55    | 28.1%  |
| Therapien:                          | Zweite MS Therapie | 15                                                                            | 19.2% | 16 | 20.5% | 22 | 28.2% | 17 | 21.8% | 8  | 10.3% | 78    | 39.8%  |
|                                     | Dritte oder mehr   | 7                                                                             | 15.9% | 8  | 18.2% | 16 | 36.4% | 10 | 22.7% | 3  | 6.8%  | 44    | 22.4%  |
|                                     | Keine Angabe       | 5                                                                             | 26.3% | 2  | 10.5% | 6  | 31.6% | 4  | 21.1% | 2  | 10.5% | 19    | 9.7%   |
| Rückblickend gleiche                | ja                 | 33                                                                            | 26.4% | 30 | 24.0% | 36 | 28.8% | 16 | 12.8% | 10 | 8.0%  | 125   | 63.8%  |
| Therapie:                           | nein               | 6                                                                             | 11.3% | 8  | 15.1% | 19 | 35.8% | 14 | 26.4% | 6  | 11.3% | 53    | 27.0%  |
|                                     | Keine Angabe       | 5                                                                             | 27.8% | 2  | 11.1% | 5  | 27.8% | 5  | 27.8% | 1  | 5.6%  | 18    | 9.2%   |

### 3.30 FRAGE 28: ZUSÄTZLICHE HILFE BEI THERAPIEENTSCHEID NACH THERAPIE BEI ERSTDIAGNOSE

#### 28. Was hätte Ihnen beim Therapieentscheid zusätzlich geholfen?

| Alle Patienten<br>(Mehrfachnennungen)                                                  | Therapieentscheid bei Erstdiagnose: |       |              |       |         |       |           |       |         |       |        |       | Total |       |
|----------------------------------------------------------------------------------------|-------------------------------------|-------|--------------|-------|---------|-------|-----------|-------|---------|-------|--------|-------|-------|-------|
|                                                                                        | Aubagio                             |       | Injizierbare |       | Gilenya |       | Tecfidera |       | Tysabri |       | Andere |       | N     | col%  |
|                                                                                        | N                                   | col%  | N            | col%  | N       | col%  | N         | col%  | N       | col%  | N      | col%  |       |       |
| Total                                                                                  | 4                                   | 100%  | 151          | 100%  | 22      | 100%  | 14        | 100%  | 10      | 100%  | 4      | 100%  | 205   | 100%  |
| Mehr Zeit mit meinem behandelnden Neurologen                                           | 1                                   | 25.0% | 45           | 29.8% | 4       | 18.2% | 2         | 14.3% | 2       | 20.0% | 2      | 50.0% | 56    | 27.3% |
| Mehr Zeit mit meiner Therapiebegleitung (MS Schwester/MS Pflegefachperson)             |                                     |       | 20           | 13.2% | 2       | 9.1%  | 2         | 14.3% | 1       | 10.0% |        |       | 25    | 12.2% |
| Mehr Informationen zu Nebenwirkungen und dem Sicherheitsprofil der einzelnen Therapien |                                     |       | 54           | 35.8% | 5       | 22.7% | 6         | 42.9% | 1       | 10.0% | 2      | 50.0% | 68    | 33.2% |
| Ein verstärkter Austausch mit anderen Betroffenen                                      |                                     |       | 27           | 17.9% | 3       | 13.6% |           |       | 2       | 20.0% |        |       | 32    | 15.6% |
| Psychologische Beratung                                                                |                                     |       | 25           | 16.6% | 4       | 18.2% | 2         | 14.3% |         |       |        |       | 31    | 15.1% |
| Keine Angabe                                                                           | 3                                   | 75.0% | 58           | 38.4% | 12      | 54.5% | 6         | 42.9% | 6       | 60.0% | 2      | 50.0% | 87    | 42.4% |

### 3.31 FRAGE 28: ZUSÄTZLICHE HILFE BEI THERAPIEENTSCHEID NACH THERAPIE BEI ERSTDIAGNOSE

#### 28. Was hätte Ihnen beim Therapieentscheid zusätzlich geholfen?

| Patienten mit Angaben<br>(Mehrfachnennungen)                                           | Therapieentscheid bei Erstdiagnose: |      |              |       |         |       |           |       |         |       |        |      | Total |       |
|----------------------------------------------------------------------------------------|-------------------------------------|------|--------------|-------|---------|-------|-----------|-------|---------|-------|--------|------|-------|-------|
|                                                                                        | Aubagio                             |      | Injizierbare |       | Gilenya |       | Tecfidera |       | Tysabri |       | Andere |      | N     | col%  |
|                                                                                        | N                                   | col% | N            | col%  | N       | col%  | N         | col%  | N       | col%  | N      | col% |       |       |
| Total                                                                                  | 1                                   | 100% | 93           | 100%  | 10      | 100%  | 8         | 100%  | 4       | 100%  | 2      | 100% | 118   | 100%  |
| Mehr Zeit mit meinem behandelnden Neurologen                                           | 1                                   | 100% | 45           | 48.4% | 4       | 40.0% | 2         | 25.0% | 2       | 50.0% | 2      | 100% | 56    | 47.5% |
| Mehr Zeit mit meiner Therapiebegleitung (MS Schwester/MS Pflegefachperson)             |                                     |      | 20           | 21.5% | 2       | 20.0% | 2         | 25.0% | 1       | 25.0% |        |      | 25    | 21.2% |
| Mehr Informationen zu Nebenwirkungen und dem Sicherheitsprofil der einzelnen Therapien |                                     |      | 54           | 58.1% | 5       | 50.0% | 6         | 75.0% | 1       | 25.0% | 2      | 100% | 68    | 57.6% |
| Ein verstärkter Austausch mit anderen Betroffenen                                      |                                     |      | 27           | 29.0% | 3       | 30.0% |           |       | 2       | 50.0% |        |      | 32    | 27.1% |
| Psychologische Beratung                                                                |                                     |      | 25           | 26.9% | 4       | 40.0% | 2         | 25.0% |         |       |        |      | 31    | 26.3% |

### 3.32 FRAGE 29A: BETREUUNG DURCH NEUROLOGE BEIM THERAPIESTART NACH KEY VARIABLEN I

| 1 = sehr schlecht - 5 = sehr gut           |                                   | Wie fühlten Sie sich beim und nach dem Therapiestart betreut: durch Neurologe/in? |       |    |       |    |       |    |        |     |       | Total |        |
|--------------------------------------------|-----------------------------------|-----------------------------------------------------------------------------------|-------|----|-------|----|-------|----|--------|-----|-------|-------|--------|
|                                            |                                   | 1                                                                                 |       | 2  |       | 3  |       | 4  |        | 5   |       | N     | col%   |
|                                            |                                   | N                                                                                 | row%  | N  | row%  | N  | row%  | N  | row%   | N   | row%  |       |        |
| Total                                      |                                   | 12                                                                                | 6.2%  | 18 | 9.3%  | 20 | 10.4% | 39 | 20.2%  | 104 | 53.9% | 193   | 100.0% |
| Geschlecht:                                | Weiblich                          | 10                                                                                | 6.8%  | 16 | 11.0% | 10 | 6.8%  | 31 | 21.2%  | 79  | 54.1% | 146   | 75.6%  |
|                                            | Männlich                          | 2                                                                                 | 4.4%  | 2  | 4.4%  | 10 | 22.2% | 7  | 15.6%  | 24  | 53.3% | 45    | 23.3%  |
|                                            | Keine Angabe                      |                                                                                   |       |    |       |    |       | 1  | 50.0%  | 1   | 50.0% | 2     | 1.0%   |
|                                            |                                   |                                                                                   |       |    |       |    |       |    |        |     |       |       |        |
| Altersgruppe:                              | bis 30 Jahre                      | 1                                                                                 | 3.1%  | 5  | 15.6% | 3  | 9.4%  | 11 | 34.4%  | 12  | 37.5% | 32    | 16.6%  |
|                                            | 31 - 40 Jahre                     | 3                                                                                 | 6.1%  | 6  | 12.2% | 4  | 8.2%  | 5  | 10.2%  | 31  | 63.3% | 49    | 25.4%  |
|                                            | 41 - 45 Jahre                     | 3                                                                                 | 9.4%  | 1  | 3.1%  | 2  | 6.3%  | 6  | 18.8%  | 20  | 62.5% | 32    | 16.6%  |
|                                            | über 45 Jahre                     | 5                                                                                 | 6.4%  | 6  | 7.7%  | 11 | 14.1% | 16 | 20.5%  | 40  | 51.3% | 78    | 40.4%  |
|                                            | Keine Angabe                      |                                                                                   |       |    |       |    |       | 1  | 50.0%  | 1   | 50.0% | 2     | 1.0%   |
| höchste<br>Berufsausbildung:               | Obligatorische Schule/Anlehre     |                                                                                   |       |    |       | 3  | 18.8% | 3  | 18.8%  | 10  | 62.5% | 16    | 8.3%   |
|                                            | Berufslehre/ - schule             | 3                                                                                 | 3.4%  | 10 | 11.2% | 6  | 6.7%  | 20 | 22.5%  | 50  | 56.2% | 89    | 46.1%  |
|                                            | Höhere Fach- und Berufsausbildung | 5                                                                                 | 9.4%  | 3  | 5.7%  | 9  | 17.0% | 8  | 15.1%  | 28  | 52.8% | 53    | 27.5%  |
|                                            | Universität / Fachhochschule      | 4                                                                                 | 12.5% | 5  | 15.6% | 2  | 6.3%  | 7  | 21.9%  | 14  | 43.8% | 32    | 16.6%  |
|                                            | Keine Angabe                      |                                                                                   |       |    |       |    |       | 1  | 33.3%  | 2   | 66.7% | 3     | 1.6%   |
| Form der MS:                               | CIS                               |                                                                                   |       |    |       | 1  | 20.0% | 2  | 40.0%  | 2   | 40.0% | 5     | 2.6%   |
|                                            | RRMS                              | 12                                                                                | 6.9%  | 16 | 9.1%  | 16 | 9.1%  | 36 | 20.6%  | 95  | 54.3% | 175   | 90.7%  |
|                                            | SPMS                              |                                                                                   |       | 2  | 18.2% | 3  | 27.3% |    |        | 6   | 54.5% | 11    | 5.7%   |
|                                            | Keine Angabe                      |                                                                                   |       |    |       |    |       | 1  | 50.0%  | 1   | 50.0% | 2     | 1.0%   |
| Dauer seit der<br>Diagnose:                | < 12 Monate                       | 1                                                                                 | 6.3%  | 1  | 6.3%  | 1  | 6.3%  | 2  | 12.5%  | 11  | 68.8% | 16    | 8.3%   |
|                                            | 1 - 3 Jahre                       |                                                                                   |       | 3  | 11.1% | 1  | 3.7%  | 8  | 29.6%  | 15  | 55.6% | 27    | 14.0%  |
|                                            | 3 - 5 Jahre                       | 3                                                                                 | 11.5% | 3  | 11.5% | 3  | 11.5% | 6  | 23.1%  | 11  | 42.3% | 26    | 13.5%  |
|                                            | 5 - 10 Jahre                      | 4                                                                                 | 9.3%  | 5  | 11.6% | 3  | 7.0%  | 11 | 25.6%  | 20  | 46.5% | 43    | 22.3%  |
|                                            | 10 - 15 Jahre                     |                                                                                   |       | 2  | 6.7%  | 5  | 16.7% | 4  | 13.3%  | 19  | 63.3% | 30    | 15.5%  |
|                                            | > 15 Jahre                        | 4                                                                                 | 8.0%  | 4  | 8.0%  | 7  | 14.0% | 7  | 14.0%  | 28  | 56.0% | 50    | 25.9%  |
|                                            | Keine Angabe                      |                                                                                   |       |    |       |    |       | 1  | 100.0% |     |       | 1     | 0.5%   |
| Gespräch mit<br>Neurologe bei<br>Diagnose: | sehr gut/gut                      | 2                                                                                 | 1.8%  | 5  | 4.5%  | 7  | 6.4%  | 20 | 18.2%  | 76  | 69.1% | 110   | 57.0%  |
|                                            | mittel                            | 2                                                                                 | 8.7%  | 4  | 17.4% | 6  | 26.1% | 5  | 21.7%  | 6   | 26.1% | 23    | 11.9%  |
|                                            | schlecht/sehr schlecht            | 8                                                                                 | 14.5% | 9  | 16.4% | 7  | 12.7% | 13 | 23.6%  | 18  | 32.7% | 55    | 28.5%  |
|                                            | Keine Angabe                      |                                                                                   |       |    |       |    |       | 1  | 20.0%  | 4   | 80.0% | 5     | 2.6%   |

### 3.33 FRAGE 29A: BETREUUNG DURCH NEUROLOGE BEIM THERAPIESTART NACH KEY VARIABLEN II

|                                  |                    | Wie fühlten Sie sich beim und nach dem Therapiestart betreut: durch Neurologe/in? |       |    |       |    |       |    |       |     |        | Total |        |
|----------------------------------|--------------------|-----------------------------------------------------------------------------------|-------|----|-------|----|-------|----|-------|-----|--------|-------|--------|
|                                  |                    | 1                                                                                 |       | 2  |       | 3  |       | 4  |       | 5   |        | N     | col%   |
|                                  |                    | N                                                                                 | row%  | N  | row%  | N  | row%  | N  | row%  | N   | row%   |       |        |
| 1 = sehr schlecht - 5 = sehr gut |                    |                                                                                   |       |    |       |    |       |    |       |     |        |       |        |
| Total                            |                    | 12                                                                                | 6.2%  | 18 | 9.3%  | 20 | 10.4% | 39 | 20.2% | 104 | 53.9%  | 193   | 100.0% |
| Zweitmeinung bei                 | ja                 | 6                                                                                 | 16.2% | 5  | 13.5% | 3  | 8.1%  | 6  | 16.2% | 17  | 45.9%  | 37    | 19.2%  |
| Diagnose:                        | nein               | 5                                                                                 | 3.3%  | 12 | 7.9%  | 17 | 11.3% | 33 | 21.9% | 84  | 55.6%  | 151   | 78.2%  |
|                                  | Keine Angabe       | 1                                                                                 | 20.0% | 1  | 20.0% |    |       |    |       | 3   | 60.0%  | 5     | 2.6%   |
| Therapieentscheid bei            | Aubagio            |                                                                                   |       | 1  | 25.0% |    |       |    |       | 3   | 75.0%  | 4     | 2.1%   |
| Erstdiagnose:                    | Injizierbare       | 10                                                                                | 7.1%  | 13 | 9.2%  | 15 | 10.6% | 31 | 22.0% | 72  | 51.1%  | 141   | 73.1%  |
|                                  | Gilenya            | 2                                                                                 | 10.5% | 2  | 10.5% | 2  | 10.5% | 2  | 10.5% | 11  | 57.9%  | 19    | 9.8%   |
|                                  | Tecfidera          |                                                                                   |       | 1  | 7.1%  | 2  | 14.3% | 5  | 35.7% | 6   | 42.9%  | 14    | 7.3%   |
|                                  | Tysabri            |                                                                                   |       |    |       | 1  | 11.1% | 1  | 11.1% | 7   | 77.8%  | 9     | 4.7%   |
|                                  | Andere             |                                                                                   |       | 1  | 33.3% |    |       |    |       | 2   | 66.7%  | 3     | 1.6%   |
|                                  | Keine Angabe       |                                                                                   |       |    |       |    |       |    |       | 3   | 100.0% | 3     | 1.6%   |
| Rebif bei                        | nein               | 8                                                                                 | 5.8%  | 11 | 8.0%  | 17 | 12.3% | 29 | 21.0% | 73  | 52.9%  | 138   | 71.5%  |
| Erstdiagnose:                    | ja                 | 4                                                                                 | 7.3%  | 7  | 12.7% | 3  | 5.5%  | 10 | 18.2% | 31  | 56.4%  | 55    | 28.5%  |
| Aktuelle Behandlung:             | Aubagio            | 1                                                                                 | 16.7% | 1  | 16.7% |    |       |    |       | 4   | 66.7%  | 6     | 3.1%   |
|                                  | Injizierbare       | 1                                                                                 | 2.6%  | 5  | 13.2% | 5  | 13.2% | 11 | 28.9% | 16  | 42.1%  | 38    | 19.7%  |
|                                  | Gilenya            | 3                                                                                 | 5.1%  | 5  | 8.5%  | 10 | 16.9% | 15 | 25.4% | 26  | 44.1%  | 59    | 30.6%  |
|                                  | Tecfidera          | 1                                                                                 | 5.3%  | 1  | 5.3%  | 1  | 5.3%  | 5  | 26.3% | 11  | 57.9%  | 19    | 9.8%   |
|                                  | Tysabri            | 5                                                                                 | 9.6%  | 3  | 5.8%  | 1  | 1.9%  | 7  | 13.5% | 36  | 69.2%  | 52    | 26.9%  |
|                                  | Andere             |                                                                                   |       | 1  | 50.0% |    |       |    |       | 1   | 50.0%  | 2     | 1.0%   |
|                                  | keine Therapie     | 1                                                                                 | 6.3%  | 2  | 12.5% | 3  | 18.8% | 1  | 6.3%  | 9   | 56.3%  | 16    | 8.3%   |
|                                  | Keine Angabe       |                                                                                   |       |    |       |    |       |    |       | 1   | 100.0% | 1     | 0.5%   |
| Rebif ist aktuelle               | nein               | 12                                                                                | 6.6%  | 16 | 8.8%  | 19 | 10.5% | 36 | 19.9% | 98  | 54.1%  | 181   | 93.8%  |
| Behandlung:                      | ja                 |                                                                                   |       | 2  | 16.7% | 1  | 8.3%  | 3  | 25.0% | 6   | 50.0%  | 12    | 6.2%   |
| Anzahl MS Langzeit-              | Erste MS Therapie  | 2                                                                                 | 3.8%  | 6  | 11.3% | 6  | 11.3% | 11 | 20.8% | 28  | 52.8%  | 53    | 27.5%  |
| Therapien:                       | Zweite MS Therapie | 7                                                                                 | 8.9%  | 5  | 6.3%  | 8  | 10.1% | 19 | 24.1% | 40  | 50.6%  | 79    | 40.9%  |
|                                  | Dritte oder mehr   | 2                                                                                 | 4.8%  | 5  | 11.9% | 3  | 7.1%  | 7  | 16.7% | 25  | 59.5%  | 42    | 21.8%  |
|                                  | Keine Angabe       | 1                                                                                 | 5.3%  | 2  | 10.5% | 3  | 15.8% | 2  | 10.5% | 11  | 57.9%  | 19    | 9.8%   |
| Rückblickend gleiche             | ja                 | 6                                                                                 | 4.9%  | 9  | 7.4%  | 13 | 10.7% | 22 | 18.0% | 72  | 59.0%  | 122   | 63.2%  |
| Therapie:                        | nein               | 5                                                                                 | 9.4%  | 7  | 13.2% | 6  | 11.3% | 13 | 24.5% | 22  | 41.5%  | 53    | 27.5%  |
|                                  | Keine Angabe       | 1                                                                                 | 5.6%  | 2  | 11.1% | 1  | 5.6%  | 4  | 22.2% | 10  | 55.6%  | 18    | 9.3%   |

### 3.34 FRAGE 29B: BETREUUNG DURCH THERAPIEBEGLEITUNG BEIM THERAPIESTART NACH KEY VARIABLEN I

| 1 = sehr schlecht - 5 = sehr gut     |                                   | Wie fühlten Sie sich beim und nach dem Therapiestart betreut: durch Therapiebegleitung? |      |    |       |    |       |    |       |    |        | Total |        |
|--------------------------------------|-----------------------------------|-----------------------------------------------------------------------------------------|------|----|-------|----|-------|----|-------|----|--------|-------|--------|
|                                      |                                   | 1                                                                                       |      | 2  |       | 3  |       | 4  |       | 5  |        | N     | col%   |
|                                      |                                   | N                                                                                       | row% | N  | row%  | N  | row%  | N  | row%  | N  | row%   |       |        |
| Total                                |                                   | 3                                                                                       | 2.4% | 10 | 8.1%  | 12 | 9.7%  | 22 | 17.7% | 77 | 62.1%  | 124   | 100.0% |
| Geschlecht:                          | Weiblich                          | 3                                                                                       | 3.2% | 10 | 10.5% | 8  | 8.4%  | 16 | 16.8% | 58 | 61.1%  | 95    | 76.6%  |
|                                      | Männlich                          |                                                                                         |      |    |       | 4  | 13.8% | 6  | 20.7% | 19 | 65.5%  | 29    | 23.4%  |
| Altersgruppe:                        | bis 30 Jahre                      |                                                                                         |      | 2  | 10.0% | 2  | 10.0% | 3  | 15.0% | 13 | 65.0%  | 20    | 16.1%  |
|                                      | 31 – 40 Jahre                     |                                                                                         |      | 3  | 8.3%  | 4  | 11.1% | 7  | 19.4% | 22 | 61.1%  | 36    | 29.0%  |
|                                      | 41 – 45 Jahre                     |                                                                                         |      | 1  | 4.2%  | 2  | 8.3%  | 4  | 16.7% | 17 | 70.8%  | 24    | 19.4%  |
|                                      | über 45 Jahre                     | 3                                                                                       | 6.8% | 4  | 9.1%  | 4  | 9.1%  | 8  | 18.2% | 25 | 56.8%  | 44    | 35.5%  |
| höchste Berufsausbildung:            | Obligatorische Schule/Anlehre     |                                                                                         |      |    |       | 1  | 12.5% | 2  | 25.0% | 5  | 62.5%  | 8     | 6.5%   |
|                                      | Berufslehre/ - schule             | 2                                                                                       | 3.4% | 6  | 10.2% | 7  | 11.9% | 10 | 16.9% | 34 | 57.6%  | 59    | 47.6%  |
|                                      | Höhere Fach- und Berufsausbildung | 1                                                                                       | 2.6% | 2  | 5.1%  | 2  | 5.1%  | 8  | 20.5% | 26 | 66.7%  | 39    | 31.5%  |
|                                      | Universität / Fachhochschule      |                                                                                         |      | 2  | 11.8% | 2  | 11.8% | 2  | 11.8% | 11 | 64.7%  | 17    | 13.7%  |
|                                      | Keine Angabe                      |                                                                                         |      |    |       |    |       |    |       | 1  | 100.0% | 1     | 0.8%   |
| Form der MS:                         | CIS                               |                                                                                         |      |    |       |    |       |    |       | 3  | 100.0% | 3     | 2.4%   |
|                                      | RRMS                              | 3                                                                                       | 2.6% | 9  | 7.9%  | 11 | 9.6%  | 22 | 19.3% | 69 | 60.5%  | 114   | 91.9%  |
|                                      | SPMS                              |                                                                                         |      | 1  | 14.3% | 1  | 14.3% |    |       | 5  | 71.4%  | 7     | 5.6%   |
| Dauer seit der Diagnose:             | < 12 Monate                       |                                                                                         |      |    |       | 1  | 14.3% | 1  | 14.3% | 5  | 71.4%  | 7     | 5.6%   |
|                                      | 1 – 3 Jahre                       |                                                                                         |      | 4  | 23.5% |    |       | 5  | 29.4% | 8  | 47.1%  | 17    | 13.7%  |
|                                      | 3 – 5 Jahre                       |                                                                                         |      |    |       | 3  | 15.0% | 3  | 15.0% | 14 | 70.0%  | 20    | 16.1%  |
|                                      | 5 – 10 Jahre                      |                                                                                         |      | 3  | 10.3% | 3  | 10.3% | 6  | 20.7% | 17 | 58.6%  | 29    | 23.4%  |
|                                      | 10 – 15 Jahre                     |                                                                                         |      |    |       | 1  | 6.3%  | 3  | 18.8% | 12 | 75.0%  | 16    | 12.9%  |
|                                      | > 15 Jahre                        | 3                                                                                       | 8.6% | 3  | 8.6%  | 4  | 11.4% | 4  | 11.4% | 21 | 60.0%  | 35    | 28.2%  |
| Gespräch mit Neurologe bei Diagnose: | sehr gut/gut                      | 1                                                                                       | 1.4% | 4  | 5.6%  | 3  | 4.2%  | 10 | 14.1% | 53 | 74.6%  | 71    | 57.3%  |
|                                      | mittel                            |                                                                                         |      | 2  | 14.3% | 3  | 21.4% | 2  | 14.3% | 7  | 50.0%  | 14    | 11.3%  |
|                                      | schlecht/sehr schlecht            | 2                                                                                       | 5.7% | 4  | 11.4% | 6  | 17.1% | 9  | 25.7% | 14 | 40.0%  | 35    | 28.2%  |
|                                      | Keine Angabe                      |                                                                                         |      |    |       |    |       | 1  | 25.0% | 3  | 75.0%  | 4     | 3.2%   |

### 3.35 FRAGE 29B: BETREUUNG DURCH THERAPIEBEGLEITUNG BEIM THERAPIESTART NACH KEY VARIABLEN II

| 1 = sehr schlecht - 5 = sehr gut |                    | Wie fühlten Sie sich beim und nach dem Therapiestart betreut: durch Therapiebegleitung? |       |    |       |    |       |    |       |    |        | Total |        |
|----------------------------------|--------------------|-----------------------------------------------------------------------------------------|-------|----|-------|----|-------|----|-------|----|--------|-------|--------|
|                                  |                    | 1                                                                                       |       | 2  |       | 3  |       | 4  |       | 5  |        | N     | col%   |
|                                  |                    | N                                                                                       | row%  | N  | row%  | N  | row%  | N  | row%  | N  | row%   |       |        |
| Total                            |                    | 3                                                                                       | 2.4%  | 10 | 8.1%  | 12 | 9.7%  | 22 | 17.7% | 77 | 62.1%  | 124   | 100.0% |
| Zweitmeinung bei                 | ja                 | 2                                                                                       | 8.0%  | 3  | 12.0% | 2  | 8.0%  | 4  | 16.0% | 14 | 56.0%  | 25    | 20.2%  |
| Diagnose:                        | nein               | 1                                                                                       | 1.1%  | 6  | 6.3%  | 10 | 10.5% | 17 | 17.9% | 61 | 64.2%  | 95    | 76.6%  |
|                                  | Keine Angabe       |                                                                                         |       | 1  | 25.0% |    |       | 1  | 25.0% | 2  | 50.0%  | 4     | 3.2%   |
| Therapieentscheid bei            | Aubagio            |                                                                                         |       |    |       |    |       |    |       | 1  | 100.0% | 1     | 0.8%   |
| Erstdiagnose:                    | Injizierbare       | 3                                                                                       | 3.0%  | 7  | 7.0%  | 11 | 11.0% | 18 | 18.0% | 61 | 61.0%  | 100   | 80.6%  |
|                                  | Gilenya            |                                                                                         |       | 1  | 12.5% |    |       | 2  | 25.0% | 5  | 62.5%  | 8     | 6.5%   |
|                                  | Tecfidera          |                                                                                         |       | 2  | 50.0% | 1  | 25.0% | 1  | 25.0% |    |        | 4     | 3.2%   |
|                                  | Tysabri            |                                                                                         |       |    |       |    |       |    |       | 7  | 100.0% | 7     | 5.6%   |
|                                  | Andere             |                                                                                         |       |    |       |    |       | 1  | 33.3% | 2  | 66.7%  | 3     | 2.4%   |
|                                  | Keine Angabe       |                                                                                         |       |    |       |    |       |    |       | 1  | 100.0% | 1     | 0.8%   |
| Rebif bei                        | nein               | 2                                                                                       | 2.4%  | 6  | 7.2%  | 7  | 8.4%  | 18 | 21.7% | 50 | 60.2%  | 83    | 66.9%  |
| Erstdiagnose:                    | ja                 | 1                                                                                       | 2.4%  | 4  | 9.8%  | 5  | 12.2% | 4  | 9.8%  | 27 | 65.9%  | 41    | 33.1%  |
| Aktuelle Behandlung:             | Aubagio            |                                                                                         |       | 1  | 33.3% |    |       |    |       | 2  | 66.7%  | 3     | 2.4%   |
|                                  | Injizierbare       | 1                                                                                       | 3.8%  | 3  | 11.5% | 2  | 7.7%  | 6  | 23.1% | 14 | 53.8%  | 26    | 21.0%  |
|                                  | Gilenya            | 1                                                                                       | 2.8%  | 3  | 8.3%  | 4  | 11.1% | 11 | 30.6% | 17 | 47.2%  | 36    | 29.0%  |
|                                  | Tecfidera          |                                                                                         |       | 1  | 11.1% | 1  | 11.1% | 1  | 11.1% | 6  | 66.7%  | 9     | 7.3%   |
|                                  | Tysabri            |                                                                                         |       | 2  | 5.4%  | 3  | 8.1%  | 3  | 8.1%  | 29 | 78.4%  | 37    | 29.8%  |
|                                  | Andere             |                                                                                         |       |    |       |    |       | 1  | 50.0% | 1  | 50.0%  | 2     | 1.6%   |
|                                  | keine Therapie     | 1                                                                                       | 11.1% |    |       | 2  | 22.2% |    |       | 6  | 66.7%  | 9     | 7.3%   |
|                                  | Keine Angabe       |                                                                                         |       |    |       |    |       |    |       | 2  | 100.0% | 2     | 1.6%   |
| Rebif ist aktuelle               | nein               | 3                                                                                       | 2.6%  | 9  | 7.8%  | 12 | 10.3% | 21 | 18.1% | 71 | 61.2%  | 116   | 93.5%  |
| Behandlung:                      | ja                 |                                                                                         |       | 1  | 12.5% |    |       | 1  | 12.5% | 6  | 75.0%  | 8     | 6.5%   |
| Anzahl MS Langzeit-              | Erste MS Therapie  |                                                                                         |       | 3  | 9.4%  | 1  | 3.1%  | 7  | 21.9% | 21 | 65.6%  | 32    | 25.8%  |
| Therapien:                       | Zweite MS Therapie | 2                                                                                       | 3.6%  | 5  | 8.9%  | 6  | 10.7% | 10 | 17.9% | 33 | 58.9%  | 56    | 45.2%  |
|                                  | Dritte oder mehr   |                                                                                         |       | 2  | 8.0%  | 3  | 12.0% | 4  | 16.0% | 16 | 64.0%  | 25    | 20.2%  |
|                                  | Keine Angabe       | 1                                                                                       | 9.1%  |    |       | 2  | 18.2% | 1  | 9.1%  | 7  | 63.6%  | 11    | 8.9%   |
| Rückblickend gleiche             | ja                 | 2                                                                                       | 2.9%  | 5  | 7.2%  | 4  | 5.8%  | 12 | 17.4% | 46 | 66.7%  | 69    | 55.6%  |
| Therapie:                        | nein               | 1                                                                                       | 2.4%  | 4  | 9.5%  | 7  | 16.7% | 6  | 14.3% | 24 | 57.1%  | 42    | 33.9%  |
|                                  | Keine Angabe       |                                                                                         |       | 1  | 7.7%  | 1  | 7.7%  | 4  | 30.8% | 7  | 53.8%  | 13    | 10.5%  |

### 3.36 FRAGE 30: ZWEITMEINUNG NACH KEY VARIABLEN I

|                                            |                                   | 30. Haben Sie sich nach/bei Ihrer Erst-Diagnose eine Zweitmeinung eingeholt? |       |      |        |              |       | Total |        |
|--------------------------------------------|-----------------------------------|------------------------------------------------------------------------------|-------|------|--------|--------------|-------|-------|--------|
|                                            |                                   | Ja                                                                           |       | Nein |        | Keine Angabe |       | N     | col%   |
|                                            |                                   | N                                                                            | row%  | N    | row%   | N            | row%  |       |        |
| Total                                      |                                   | 41                                                                           | 19.3% | 158  | 74.5%  | 13           | 6.1%  | 212   | 100.0% |
| Geschlecht:                                | Weiblich                          | 30                                                                           | 19.4% | 116  | 74.8%  | 9            | 5.8%  | 155   | 73.1%  |
|                                            | Männlich                          | 11                                                                           | 20.0% | 40   | 72.7%  | 4            | 7.3%  | 55    | 25.9%  |
|                                            | Keine Angabe                      |                                                                              |       | 2    | 100.0% |              |       | 2     | 0.9%   |
|                                            |                                   |                                                                              |       |      |        |              |       |       |        |
| Altersgruppe:                              | bis 30 Jahre                      | 9                                                                            | 27.3% | 23   | 69.7%  | 1            | 3.0%  | 33    | 15.6%  |
|                                            | 31 – 40 Jahre                     | 6                                                                            | 10.7% | 44   | 78.6%  | 6            | 10.7% | 56    | 26.4%  |
|                                            | 41 – 45 Jahre                     | 4                                                                            | 10.8% | 31   | 83.8%  | 2            | 5.4%  | 37    | 17.5%  |
|                                            | über 45 Jahre                     | 22                                                                           | 26.2% | 58   | 69.0%  | 4            | 4.8%  | 84    | 39.6%  |
|                                            | Keine Angabe                      |                                                                              |       | 2    | 100.0% |              |       | 2     | 0.9%   |
| höchste<br>Berufsausbildung:               | Obligatorische Schule/Anlehre     | 3                                                                            | 17.6% | 14   | 82.4%  |              |       | 17    | 8.0%   |
|                                            | Berufslehre/ - schule             | 15                                                                           | 15.3% | 74   | 75.5%  | 9            | 9.2%  | 98    | 46.2%  |
|                                            | Höhere Fach- und Berufsausbildung | 13                                                                           | 21.7% | 44   | 73.3%  | 3            | 5.0%  | 60    | 28.3%  |
|                                            | Universität / Fachhochschule      | 9                                                                            | 26.5% | 24   | 70.6%  | 1            | 2.9%  | 34    | 16.0%  |
|                                            | Keine Angabe                      | 1                                                                            | 33.3% | 2    | 66.7%  |              |       | 3     | 1.4%   |
| Form der MS:                               | CIS                               |                                                                              |       | 5    | 100.0% |              |       | 5     | 2.4%   |
|                                            | RRMS                              | 37                                                                           | 19.5% | 142  | 74.7%  | 11           | 5.8%  | 190   | 89.6%  |
|                                            | SPMS                              | 4                                                                            | 26.7% | 9    | 60.0%  | 2            | 13.3% | 15    | 7.1%   |
|                                            | Keine Angabe                      |                                                                              |       | 2    | 100.0% |              |       | 2     | 0.9%   |
| Dauer seit der<br>Diagnose:                | < 12 Monate                       | 3                                                                            | 16.7% | 12   | 66.7%  | 3            | 16.7% | 18    | 8.5%   |
|                                            | 1 – 3 Jahre                       | 5                                                                            | 17.2% | 23   | 79.3%  | 1            | 3.4%  | 29    | 13.7%  |
|                                            | 3 – 5 Jahre                       | 4                                                                            | 14.3% | 22   | 78.6%  | 2            | 7.1%  | 28    | 13.2%  |
|                                            | 5 – 10 Jahre                      | 9                                                                            | 20.0% | 36   | 80.0%  |              |       | 45    | 21.2%  |
|                                            | 10 – 15 Jahre                     | 4                                                                            | 11.4% | 29   | 82.9%  | 2            | 5.7%  | 35    | 16.5%  |
|                                            | > 15 Jahre                        | 16                                                                           | 28.6% | 35   | 62.5%  | 5            | 8.9%  | 56    | 26.4%  |
|                                            | Keine Angabe                      |                                                                              |       | 1    | 100.0% |              |       | 1     | 0.5%   |
| Gespräch mit<br>Neurologe bei<br>Diagnose: | sehr gut/gut                      | 18                                                                           | 15.3% | 94   | 79.7%  | 6            | 5.1%  | 118   | 55.7%  |
|                                            | mittel                            | 7                                                                            | 26.9% | 18   | 69.2%  | 1            | 3.8%  | 26    | 12.3%  |
|                                            | schlecht/sehr schlecht            | 15                                                                           | 23.8% | 43   | 68.3%  | 5            | 7.9%  | 63    | 29.7%  |
|                                            | Keine Angabe                      | 1                                                                            | 20.0% | 3    | 60.0%  | 1            | 20.0% | 5     | 2.4%   |

### 3.37 FRAGE 30: ZWEITMEINUNG NACH KEY VARIABLEN II

|                                     |                    | 30. Haben Sie sich nach/bei Ihrer Erst-Diagnose eine Zweitmeinung eingeholt? |        |      |        |              |        | Total |        |
|-------------------------------------|--------------------|------------------------------------------------------------------------------|--------|------|--------|--------------|--------|-------|--------|
|                                     |                    | Ja                                                                           |        | Nein |        | Keine Angabe |        | N     | col%   |
|                                     |                    | N                                                                            | row%   | N    | row%   | N            | row%   |       |        |
| Total                               |                    | 41                                                                           | 19.3%  | 158  | 74.5%  | 13           | 6.1%   | 212   | 100.0% |
| Zweitmeinung bei Diagnose:          | ja                 | 41                                                                           | 100.0% |      |        |              |        | 41    | 19.3%  |
|                                     | nein               |                                                                              |        | 158  | 100.0% |              |        | 158   | 74.5%  |
|                                     | Keine Angabe       |                                                                              |        |      |        | 13           | 100.0% | 13    | 6.1%   |
|                                     |                    |                                                                              |        |      |        |              |        |       |        |
| Therapieentscheid bei Erstdiagnose: | Aubagio            |                                                                              |        | 4    | 100.0% |              |        | 4     | 1.9%   |
|                                     | Injizierbare       | 32                                                                           | 21.2%  | 114  | 75.5%  | 5            | 3.3%   | 151   | 71.2%  |
|                                     | Gilenya            | 4                                                                            | 18.2%  | 16   | 72.7%  | 2            | 9.1%   | 22    | 10.4%  |
|                                     | Tecfidera          | 3                                                                            | 21.4%  | 11   | 78.6%  |              |        | 14    | 6.6%   |
|                                     | Tysabri            | 1                                                                            | 10.0%  | 8    | 80.0%  | 1            | 10.0%  | 10    | 4.7%   |
|                                     | Andere             | 1                                                                            | 25.0%  | 2    | 50.0%  | 1            | 25.0%  | 4     | 1.9%   |
|                                     | Keine Angabe       |                                                                              |        | 3    | 42.9%  | 4            | 57.1%  | 7     | 3.3%   |
|                                     |                    |                                                                              |        |      |        |              |        |       |        |
| Rebif bei Erstdiagnose:             | nein               | 27                                                                           | 17.8%  | 115  | 75.7%  | 10           | 6.6%   | 152   | 71.7%  |
|                                     | ja                 | 14                                                                           | 23.3%  | 43   | 71.7%  | 3            | 5.0%   | 60    | 28.3%  |
| Aktuelle Behandlung:                | Aubagio            |                                                                              |        | 7    | 87.5%  | 1            | 12.5%  | 8     | 3.8%   |
|                                     | Injizierbare       | 10                                                                           | 25.6%  | 27   | 69.2%  | 2            | 5.1%   | 39    | 18.4%  |
|                                     | Gilenya            | 9                                                                            | 14.1%  | 51   | 79.7%  | 4            | 6.3%   | 64    | 30.2%  |
|                                     | Tecfidera          | 6                                                                            | 30.0%  | 14   | 70.0%  |              |        | 20    | 9.4%   |
|                                     | Tysabri            | 9                                                                            | 15.8%  | 45   | 78.9%  | 3            | 5.3%   | 57    | 26.9%  |
|                                     | Andere             |                                                                              |        | 2    | 66.7%  | 1            | 33.3%  | 3     | 1.4%   |
|                                     | keine Therapie     | 6                                                                            | 31.6%  | 11   | 57.9%  | 2            | 10.5%  | 19    | 9.0%   |
|                                     | Keine Angabe       | 1                                                                            | 50.0%  | 1    | 50.0%  |              |        | 2     | 0.9%   |
|                                     |                    |                                                                              |        |      |        |              |        |       |        |
| Rebif ist aktuelle Behandlung:      | nein               | 37                                                                           | 18.5%  | 151  | 75.5%  | 12           | 6.0%   | 200   | 94.3%  |
|                                     | ja                 | 4                                                                            | 33.3%  | 7    | 58.3%  | 1            | 8.3%   | 12    | 5.7%   |
| Anzahl MS Langzeit-Therapien:       | Erste MS Therapie  | 11                                                                           | 19.0%  | 42   | 72.4%  | 5            | 8.6%   | 58    | 27.4%  |
|                                     | Zweite MS Therapie | 16                                                                           | 19.0%  | 66   | 78.6%  | 2            | 2.4%   | 84    | 39.6%  |
|                                     | Dritte oder mehr   | 7                                                                            | 14.6%  | 37   | 77.1%  | 4            | 8.3%   | 48    | 22.6%  |
|                                     | Keine Angabe       | 7                                                                            | 31.8%  | 13   | 59.1%  | 2            | 9.1%   | 22    | 10.4%  |
| Rückblickend gleiche Therapie:      | ja                 | 22                                                                           | 17.2%  | 103  | 80.5%  | 3            | 2.3%   | 128   | 60.4%  |
|                                     | nein               | 12                                                                           | 21.4%  | 41   | 73.2%  | 3            | 5.4%   | 56    | 26.4%  |
|                                     | Keine Angabe       | 7                                                                            | 25.0%  | 14   | 50.0%  | 7            | 25.0%  | 28    | 13.2%  |

### 3.38 FRAGE 31: WIE HILFREICH WAR DIE ZWEITMEINUNG NACH KEY VARIABLEN I

| 1 = sehr hilfreich - 5 = überhaupt nicht hilfreich |                                   | 31. Wie hilfreich war die Zweitmeinung rückblickend? |        |   |       |   |        |   |       |   |       | Total |        |
|----------------------------------------------------|-----------------------------------|------------------------------------------------------|--------|---|-------|---|--------|---|-------|---|-------|-------|--------|
|                                                    |                                   | 1                                                    |        | 2 |       | 3 |        | 4 |       | 5 |       | N     | col%   |
|                                                    |                                   | N                                                    | row%   | N | row%  | N | row%   | N | row%  | N | row%  |       |        |
| Total                                              |                                   | 20                                                   | 50.0%  | 6 | 15.0% | 4 | 10.0%  | 6 | 15.0% | 4 | 10.0% | 40    | 100.0% |
| Geschlecht:                                        | Weiblich                          | 15                                                   | 51.7%  | 6 | 20.7% | 1 | 3.4%   | 4 | 13.8% | 3 | 10.3% | 29    | 72.5%  |
|                                                    | Männlich                          | 5                                                    | 45.5%  |   |       | 3 | 27.3%  | 2 | 18.2% | 1 | 9.1%  | 11    | 27.5%  |
| Altersgruppe:                                      | bis 30 Jahre                      | 5                                                    | 55.6%  | 1 | 11.1% | 2 | 22.2%  |   |       | 1 | 11.1% | 9     | 22.5%  |
|                                                    | 31 – 40 Jahre                     | 3                                                    | 50.0%  |   |       |   |        | 2 | 33.3% | 1 | 16.7% | 6     | 15.0%  |
|                                                    | 41 – 45 Jahre                     | 1                                                    | 25.0%  | 1 | 25.0% |   |        | 1 | 25.0% | 1 | 25.0% | 4     | 10.0%  |
|                                                    | über 45 Jahre                     | 11                                                   | 52.4%  | 4 | 19.0% | 2 | 9.5%   | 3 | 14.3% | 1 | 4.8%  | 21    | 52.5%  |
| höchste Berufsausbildung:                          | Obligatorische Schule/Anlehre     | 1                                                    | 33.3%  | 1 | 33.3% |   |        | 1 | 33.3% |   |       | 3     | 7.5%   |
|                                                    | Berufslehre/ - schule             | 8                                                    | 57.1%  | 3 | 21.4% | 2 | 14.3%  | 1 | 7.1%  |   |       | 14    | 35.0%  |
|                                                    | Höhere Fach- und Berufsausbildung | 6                                                    | 46.2%  | 1 | 7.7%  | 1 | 7.7%   | 3 | 23.1% | 2 | 15.4% | 13    | 32.5%  |
|                                                    | Universität / Fachhochschule      | 5                                                    | 55.6%  | 1 | 11.1% |   |        | 1 | 11.1% | 2 | 22.2% | 9     | 22.5%  |
|                                                    | Keine Angabe                      |                                                      |        |   |       | 1 | 100.0% |   |       |   |       | 1     | 2.5%   |
| Form der MS:                                       | RRMS                              | 18                                                   | 50.0%  | 5 | 13.9% | 3 | 8.3%   | 6 | 16.7% | 4 | 11.1% | 36    | 90.0%  |
|                                                    | SPMS                              | 2                                                    | 50.0%  | 1 | 25.0% | 1 | 25.0%  |   |       |   |       | 4     | 10.0%  |
| Dauer seit der Diagnose:                           | < 12 Monate                       | 2                                                    | 66.7%  |   |       | 1 | 33.3%  |   |       |   |       | 3     | 7.5%   |
|                                                    | 1 – 3 Jahre                       | 3                                                    | 60.0%  |   |       | 1 | 20.0%  |   |       | 1 | 20.0% | 5     | 12.5%  |
|                                                    | 3 – 5 Jahre                       | 2                                                    | 50.0%  | 1 | 25.0% |   |        | 1 | 25.0% |   |       | 4     | 10.0%  |
|                                                    | 5 – 10 Jahre                      | 4                                                    | 44.4%  | 1 | 11.1% |   |        | 3 | 33.3% | 1 | 11.1% | 9     | 22.5%  |
|                                                    | 10 – 15 Jahre                     | 1                                                    | 25.0%  | 2 | 50.0% |   |        |   |       | 1 | 25.0% | 4     | 10.0%  |
|                                                    | > 15 Jahre                        | 8                                                    | 53.3%  | 2 | 13.3% | 2 | 13.3%  | 2 | 13.3% | 1 | 6.7%  | 15    | 37.5%  |
| Gespräch mit Neurologe bei Diagnose:               | sehr gut/gut                      | 9                                                    | 52.9%  | 2 | 11.8% | 2 | 11.8%  | 2 | 11.8% | 2 | 11.8% | 17    | 42.5%  |
|                                                    | mittel                            | 2                                                    | 28.6%  | 2 | 28.6% | 2 | 28.6%  |   |       | 1 | 14.3% | 7     | 17.5%  |
|                                                    | schlecht/sehr schlecht            | 8                                                    | 53.3%  | 2 | 13.3% |   |        | 4 | 26.7% | 1 | 6.7%  | 15    | 37.5%  |
|                                                    | Keine Angabe                      | 1                                                    | 100.0% |   |       |   |        |   |       |   |       | 1     | 2.5%   |

### 3.39 FRAGE 31: WIE HILFREICH WAR DIE ZWEITMEINUNG NACH KEY VARIABLEN II

| 1 = sehr hilfreich - 5 = überhaupt nicht hilfreich |                    | 31. Wie hilfreich war die Zweitmeinung rückblickend? |        |   |       |   |       |   |       |   |       | Total |        |
|----------------------------------------------------|--------------------|------------------------------------------------------|--------|---|-------|---|-------|---|-------|---|-------|-------|--------|
|                                                    |                    | 1                                                    |        | 2 |       | 3 |       | 4 |       | 5 |       | N     | col%   |
|                                                    |                    | N                                                    | row%   | N | row%  | N | row%  | N | row%  | N | row%  |       |        |
| Total                                              |                    | 20                                                   | 50.0%  | 6 | 15.0% | 4 | 10.0% | 6 | 15.0% | 4 | 10.0% | 40    | 100.0% |
| Zweitmeinung bei Diagnose:                         | ja                 | 20                                                   | 50.0%  | 6 | 15.0% | 4 | 10.0% | 6 | 15.0% | 4 | 10.0% | 40    | 100.0% |
| Therapieentscheid bei Erstdiagnose:                | Injizierbare       | 13                                                   | 41.9%  | 5 | 16.1% | 4 | 12.9% | 6 | 19.4% | 3 | 9.7%  | 31    | 77.5%  |
|                                                    | Gilenya            | 3                                                    | 75.0%  | 1 | 25.0% |   |       |   |       |   |       | 4     | 10.0%  |
|                                                    | Tecfidera          | 2                                                    | 66.7%  |   |       |   |       |   |       | 1 | 33.3% | 3     | 7.5%   |
|                                                    | Tysabri            | 1                                                    | 100.0% |   |       |   |       |   |       |   |       | 1     | 2.5%   |
|                                                    | Andere             | 1                                                    | 100.0% |   |       |   |       |   |       |   |       | 1     | 2.5%   |
| Rebif bei Erstdiagnose:                            | nein               | 11                                                   | 40.7%  | 5 | 18.5% | 4 | 14.8% | 5 | 18.5% | 2 | 7.4%  | 27    | 67.5%  |
|                                                    | ja                 | 9                                                    | 69.2%  | 1 | 7.7%  |   |       | 1 | 7.7%  | 2 | 15.4% | 13    | 32.5%  |
| Aktuelle Behandlung:                               | Injizierbare       | 3                                                    | 33.3%  | 3 | 33.3% | 1 | 11.1% | 2 | 22.2% |   |       | 9     | 22.5%  |
|                                                    | Gilenya            | 5                                                    | 55.6%  |   |       | 1 | 11.1% | 3 | 33.3% |   |       | 9     | 22.5%  |
|                                                    | Tecfidera          | 2                                                    | 33.3%  | 2 | 33.3% | 1 | 16.7% |   |       | 1 | 16.7% | 6     | 15.0%  |
|                                                    | Tysabri            | 7                                                    | 77.8%  |   |       |   |       |   |       | 2 | 22.2% | 9     | 22.5%  |
|                                                    | keine Therapie     | 2                                                    | 33.3%  | 1 | 16.7% | 1 | 16.7% | 1 | 16.7% | 1 | 16.7% | 6     | 15.0%  |
|                                                    | Keine Angabe       | 1                                                    | 100.0% |   |       |   |       |   |       |   |       | 1     | 2.5%   |
| Rebif ist aktuelle Behandlung:                     | nein               | 18                                                   | 48.6%  | 5 | 13.5% | 4 | 10.8% | 6 | 16.2% | 4 | 10.8% | 37    | 92.5%  |
|                                                    | ja                 | 2                                                    | 66.7%  | 1 | 33.3% |   |       |   |       |   |       | 3     | 7.5%   |
| Anzahl MS Langzeit-Therapien:                      | Erste MS Therapie  | 4                                                    | 40.0%  | 2 | 20.0% | 1 | 10.0% | 2 | 20.0% | 1 | 10.0% | 10    | 25.0%  |
|                                                    | Zweite MS Therapie | 11                                                   | 68.8%  | 2 | 12.5% | 2 | 12.5% | 1 | 6.3%  |   |       | 16    | 40.0%  |
|                                                    | Dritte oder mehr   | 2                                                    | 28.6%  | 1 | 14.3% |   |       | 2 | 28.6% | 2 | 28.6% | 7     | 17.5%  |
|                                                    | Keine Angabe       | 3                                                    | 42.9%  | 1 | 14.3% | 1 | 14.3% | 1 | 14.3% | 1 | 14.3% | 7     | 17.5%  |
| Rückblickend gleiche Therapie:                     | ja                 | 11                                                   | 52.4%  | 5 | 23.8% |   |       | 2 | 9.5%  | 3 | 14.3% | 21    | 52.5%  |
|                                                    | nein               | 5                                                    | 41.7%  | 1 | 8.3%  | 3 | 25.0% | 2 | 16.7% | 1 | 8.3%  | 12    | 30.0%  |
|                                                    | Keine Angabe       | 4                                                    | 57.1%  |   |       | 1 | 14.3% | 2 | 28.6% |   |       | 7     | 17.5%  |

**3.40 FRAGE 32: DAUER DER ERSTTHERAPIE BIS ZUM WECHSEL AUF EIN ANDERES PRÄPARAT NACH KEY VARIABLEN I**

|                                                                                                                   |                                   | 32. Wie lange war die Dauer der Ersttherapie nach Diagnosestellung bis zu einem Wechsel auf ein anderes Präparat? |        |               |        |               |        |               |        |           |        | Total |        |
|-------------------------------------------------------------------------------------------------------------------|-----------------------------------|-------------------------------------------------------------------------------------------------------------------|--------|---------------|--------|---------------|--------|---------------|--------|-----------|--------|-------|--------|
|                                                                                                                   |                                   | Immer noch auf Erst-Therapie                                                                                      |        | 1 – 12 Monate |        | > 1 – 3 Jahre |        | > 3 – 5 Jahre |        | > 5 Jahre |        | N     | col%   |
|                                                                                                                   |                                   | N                                                                                                                 | row%   | N             | row%   | N             | row%   | N             | row%   | N         | row%   |       |        |
| Total                                                                                                             |                                   | 49                                                                                                                | 25.5%  | 38            | 19.8%  | 46            | 24.0%  | 18            | 9.4%   | 41        | 21.4%  | 192   | 100.0% |
| 32. Wie lange war die Dauer der Ersttherapie nach Diagnosestellung bis zu einem Wechsel auf ein anderes Präparat? | Immer noch auf Erst-Therapie      | 49                                                                                                                | 100.0% |               |        |               |        |               |        |           |        | 49    | 25.5%  |
|                                                                                                                   | 1 – 6 Monate                      |                                                                                                                   |        | 15            | 100.0% |               |        |               |        |           |        | 15    | 7.8%   |
|                                                                                                                   | > 6 – 12 Monate                   |                                                                                                                   |        | 23            | 100.0% |               |        |               |        |           |        | 23    | 12.0%  |
|                                                                                                                   | > 1 – 3 Jahre                     |                                                                                                                   |        |               |        | 46            | 100.0% |               |        |           |        | 46    | 24.0%  |
|                                                                                                                   | > 3 – 5 Jahre                     |                                                                                                                   |        |               |        |               |        | 18            | 100.0% |           |        | 18    | 9.4%   |
|                                                                                                                   | > 5 Jahre                         |                                                                                                                   |        |               |        |               |        |               |        | 41        | 100.0% | 41    | 21.4%  |
| Geschlecht:                                                                                                       | Weiblich                          | 36                                                                                                                | 25.0%  | 26            | 18.1%  | 36            | 25.0%  | 12            | 8.3%   | 34        | 23.6%  | 144   | 75.0%  |
|                                                                                                                   | Männlich                          | 12                                                                                                                | 26.1%  | 12            | 26.1%  | 10            | 21.7%  | 6             | 13.0%  | 6         | 13.0%  | 46    | 24.0%  |
|                                                                                                                   | Keine Angabe                      | 1                                                                                                                 | 50.0%  |               |        |               |        |               |        | 1         | 50.0%  | 2     | 1.0%   |
| Altersgruppe:                                                                                                     | bis 30 Jahre                      | 13                                                                                                                | 41.9%  | 10            | 32.3%  | 6             | 19.4%  | 2             | 6.5%   |           |        | 31    | 16.1%  |
|                                                                                                                   | 31 – 40 Jahre                     | 11                                                                                                                | 22.9%  | 16            | 33.3%  | 15            | 31.3%  | 1             | 2.1%   | 5         | 10.4%  | 48    | 25.0%  |
|                                                                                                                   | 41 – 45 Jahre                     | 6                                                                                                                 | 17.1%  | 5             | 14.3%  | 9             | 25.7%  | 6             | 17.1%  | 9         | 25.7%  | 35    | 18.2%  |
|                                                                                                                   | über 45 Jahre                     | 18                                                                                                                | 23.7%  | 7             | 9.2%   | 16            | 21.1%  | 9             | 11.8%  | 26        | 34.2%  | 76    | 39.6%  |
|                                                                                                                   | Keine Angabe                      | 1                                                                                                                 | 50.0%  |               |        |               |        |               |        | 1         | 50.0%  | 2     | 1.0%   |
| höchste Berufsausbildung:                                                                                         | Obligatorische Schule/Anlehre     | 4                                                                                                                 | 25.0%  | 4             | 25.0%  | 2             | 12.5%  | 1             | 6.3%   | 5         | 31.3%  | 16    | 8.3%   |
|                                                                                                                   | Berufslehre/ - schule             | 17                                                                                                                | 20.0%  | 16            | 18.8%  | 27            | 31.8%  | 5             | 5.9%   | 20        | 23.5%  | 85    | 44.3%  |
|                                                                                                                   | Höhere Fach- und Berufsausbildung | 15                                                                                                                | 26.8%  | 10            | 17.9%  | 9             | 16.1%  | 10            | 17.9%  | 12        | 21.4%  | 56    | 29.2%  |
|                                                                                                                   | Universität / Fachhochschule      | 12                                                                                                                | 37.5%  | 7             | 21.9%  | 8             | 25.0%  | 2             | 6.3%   | 3         | 9.4%   | 32    | 16.7%  |
|                                                                                                                   | Keine Angabe                      | 1                                                                                                                 | 33.3%  | 1             | 33.3%  |               |        |               |        | 1         | 33.3%  | 3     | 1.6%   |
| Form der MS:                                                                                                      | CIS                               | 5                                                                                                                 | 100.0% |               |        |               |        |               |        |           |        | 5     | 2.6%   |
|                                                                                                                   | RRMS                              | 43                                                                                                                | 24.6%  | 35            | 20.0%  | 44            | 25.1%  | 16            | 9.1%   | 37        | 21.1%  | 175   | 91.1%  |
|                                                                                                                   | SPMS                              | 1                                                                                                                 | 9.1%   | 3             | 27.3%  | 2             | 18.2%  | 2             | 18.2%  | 3         | 27.3%  | 11    | 5.7%   |
|                                                                                                                   | Keine Angabe                      |                                                                                                                   |        |               |        |               |        |               |        | 1         | 100.0% | 1     | 0.5%   |
| Dauer seit der Diagnose:                                                                                          | < 12 Monate                       | 12                                                                                                                | 92.3%  | 1             | 7.7%   |               |        |               |        |           |        | 13    | 6.8%   |
|                                                                                                                   | 1 – 3 Jahre                       | 18                                                                                                                | 62.1%  | 7             | 24.1%  | 4             | 13.8%  |               |        |           |        | 29    | 15.1%  |
|                                                                                                                   | 3 – 5 Jahre                       | 6                                                                                                                 | 25.0%  | 8             | 33.3%  | 7             | 29.2%  | 3             | 12.5%  |           |        | 24    | 12.5%  |
|                                                                                                                   | 5 – 10 Jahre                      | 6                                                                                                                 | 13.6%  | 10            | 22.7%  | 17            | 38.6%  | 7             | 15.9%  | 4         | 9.1%   | 44    | 22.9%  |
|                                                                                                                   | 10 – 15 Jahre                     | 2                                                                                                                 | 6.1%   | 6             | 18.2%  | 10            | 30.3%  | 5             | 15.2%  | 10        | 30.3%  | 33    | 17.2%  |
|                                                                                                                   | > 15 Jahre                        | 5                                                                                                                 | 10.4%  | 6             | 12.5%  | 8             | 16.7%  | 3             | 6.3%   | 26        | 54.2%  | 48    | 25.0%  |
|                                                                                                                   | Keine Angabe                      |                                                                                                                   |        |               |        |               |        |               |        | 1         | 100.0% | 1     | 0.5%   |
| Gespräch mit Neurologe bei Diagnose:                                                                              | sehr gut/gut                      | 36                                                                                                                | 33.6%  | 19            | 17.8%  | 25            | 23.4%  | 9             | 8.4%   | 18        | 16.8%  | 107   | 55.7%  |
|                                                                                                                   | mittel                            | 4                                                                                                                 | 17.4%  | 4             | 17.4%  | 5             | 21.7%  | 3             | 13.0%  | 7         | 30.4%  | 23    | 12.0%  |
|                                                                                                                   | schlecht/sehr schlecht            | 8                                                                                                                 | 14.0%  | 15            | 26.3%  | 14            | 24.6%  | 5             | 8.8%   | 15        | 26.3%  | 57    | 29.7%  |
|                                                                                                                   | Keine Angabe                      | 1                                                                                                                 | 20.0%  |               |        | 2             | 40.0%  | 1             | 20.0%  | 1         | 20.0%  | 5     | 2.6%   |

### 3.41 FRAGE 32: DAUER DER ERSTTHERAPIE BIS ZUM WECHSEL AUF EIN ANDERES PRÄPARAT NACH KEY VARIABLEN II

|                                     |                    | 32. Wie lange war die Dauer der Ersttherapie nach Diagnosestellung bis zu einem Wechsel auf ein anderes Präparat? |        |               |       |               |       |               |       |           |        | Total |        |
|-------------------------------------|--------------------|-------------------------------------------------------------------------------------------------------------------|--------|---------------|-------|---------------|-------|---------------|-------|-----------|--------|-------|--------|
|                                     |                    | Immer noch auf Erst-Therapie                                                                                      |        | 1 - 12 Monate |       | > 1 - 3 Jahre |       | > 3 - 5 Jahre |       | > 5 Jahre |        | N     | col%   |
|                                     |                    | N                                                                                                                 | row%   | N             | row%  | N             | row%  | N             | row%  | N         | row%   |       |        |
| Total                               |                    | 49                                                                                                                | 25.5%  | 38            | 19.8% | 46            | 24.0% | 18            | 9.4%  | 41        | 21.4%  | 192   | 100.0% |
| Zweitmeinung bei Diagnose:          | ja                 | 8                                                                                                                 | 20.5%  | 10            | 25.6% | 10            | 25.6% | 2             | 5.1%  | 9         | 23.1%  | 39    | 20.3%  |
|                                     | nein               | 40                                                                                                                | 26.8%  | 27            | 18.1% | 36            | 24.2% | 16            | 10.7% | 30        | 20.1%  | 149   | 77.6%  |
|                                     | Keine Angabe       | 1                                                                                                                 | 25.0%  | 1             | 25.0% |               |       |               |       | 2         | 50.0%  | 4     | 2.1%   |
| Therapieentscheid bei Erstdiagnose: | Aubagio            | 4                                                                                                                 | 100.0% |               |       |               |       |               |       |           |        | 4     | 2.1%   |
|                                     | Injizierbare       | 22                                                                                                                | 15.2%  | 28            | 19.3% | 39            | 26.9% | 17            | 11.7% | 39        | 26.9%  | 145   | 75.5%  |
|                                     | Gilenya            | 12                                                                                                                | 66.7%  | 4             | 22.2% | 2             | 11.1% |               |       |           |        | 18    | 9.4%   |
|                                     | Tecfidera          | 6                                                                                                                 | 42.9%  | 4             | 28.6% | 4             | 28.6% |               |       |           |        | 14    | 7.3%   |
|                                     | Tysabri            | 4                                                                                                                 | 50.0%  | 1             | 12.5% | 1             | 12.5% | 1             | 12.5% | 1         | 12.5%  | 8     | 4.2%   |
|                                     | Andere             | 1                                                                                                                 | 50.0%  | 1             | 50.0% |               |       |               |       |           |        | 2     | 1.0%   |
|                                     | Keine Angabe       |                                                                                                                   |        |               |       |               |       |               |       | 1         | 100.0% | 1     | 0.5%   |
| Rebif bei Erstdiagnose:             | nein               | 42                                                                                                                | 31.1%  | 29            | 21.5% | 29            | 21.5% | 13            | 9.6%  | 22        | 16.3%  | 135   | 70.3%  |
|                                     | ja                 | 7                                                                                                                 | 12.3%  | 9             | 15.8% | 17            | 29.8% | 5             | 8.8%  | 19        | 33.3%  | 57    | 29.7%  |
| Aktuelle Behandlung:                | Aubagio            | 4                                                                                                                 | 57.1%  |               |       | 1             | 14.3% |               |       | 2         | 28.6%  | 7     | 3.6%   |
|                                     | Injizierbare       | 21                                                                                                                | 61.8%  | 1             | 2.9%  | 4             | 11.8% | 1             | 2.9%  | 7         | 20.6%  | 34    | 17.7%  |
|                                     | Gilenya            | 12                                                                                                                | 20.3%  | 13            | 22.0% | 19            | 32.2% | 9             | 15.3% | 6         | 10.2%  | 59    | 30.7%  |
|                                     | Tecfidera          | 5                                                                                                                 | 25.0%  | 2             | 10.0% | 3             | 15.0% |               |       | 10        | 50.0%  | 20    | 10.4%  |
|                                     | Tysabri            | 4                                                                                                                 | 7.5%   | 17            | 32.1% | 15            | 28.3% | 5             | 9.4%  | 12        | 22.6%  | 53    | 27.6%  |
|                                     | Andere             |                                                                                                                   |        | 1             | 50.0% |               |       |               |       | 1         | 50.0%  | 2     | 1.0%   |
|                                     | keine Therapie     | 3                                                                                                                 | 20.0%  | 3             | 20.0% | 4             | 26.7% | 2             | 13.3% | 3         | 20.0%  | 15    | 7.8%   |
|                                     | Keine Angabe       |                                                                                                                   |        | 1             | 50.0% |               |       | 1             | 50.0% |           |        | 2     | 1.0%   |
| Rebif ist aktuelle Behandlung:      | nein               | 42                                                                                                                | 23.1%  | 37            | 20.3% | 45            | 24.7% | 18            | 9.9%  | 40        | 22.0%  | 182   | 94.8%  |
|                                     | ja                 | 7                                                                                                                 | 70.0%  | 1             | 10.0% | 1             | 10.0% |               |       | 1         | 10.0%  | 10    | 5.2%   |
| Anzahl MS Langzeit-Therapien:       | Erste MS Therapie  | 45                                                                                                                | 90.0%  | 2             | 4.0%  | 1             | 2.0%  | 1             | 2.0%  | 1         | 2.0%   | 50    | 26.0%  |
|                                     | Zweite MS Therapie | 1                                                                                                                 | 1.2%   | 17            | 21.0% | 24            | 29.6% | 12            | 14.8% | 27        | 33.3%  | 81    | 42.2%  |
|                                     | Dritte oder mehr   |                                                                                                                   |        | 16            | 36.4% | 15            | 34.1% | 3             | 6.8%  | 10        | 22.7%  | 44    | 22.9%  |
|                                     | Keine Angabe       | 3                                                                                                                 | 17.6%  | 3             | 17.6% | 6             | 35.3% | 2             | 11.8% | 3         | 17.6%  | 17    | 8.9%   |
| Rückblickend gleiche Therapie:      | ja                 | 43                                                                                                                | 36.4%  | 19            | 16.1% | 15            | 12.7% | 10            | 8.5%  | 31        | 26.3%  | 118   | 61.5%  |
|                                     | nein               | 2                                                                                                                 | 3.7%   | 17            | 31.5% | 21            | 38.9% | 8             | 14.8% | 6         | 11.1%  | 54    | 28.1%  |
|                                     | Keine Angabe       | 4                                                                                                                 | 20.0%  | 2             | 10.0% | 10            | 50.0% |               |       | 4         | 20.0%  | 20    | 10.4%  |

**3.42 FRAGE 33: GRÜNDE FÜR EINEN WECHSEL DER ERSTHTERAPIE NACH KEY VARIABLEN I**

|                                      |                                   | Wirksamkeit |        | Verträglichkeit / Nebenwirkungen |        | Art der Anwendung |        | Kinder/Familienplanung |       | Anderes |       | Total |        |
|--------------------------------------|-----------------------------------|-------------|--------|----------------------------------|--------|-------------------|--------|------------------------|-------|---------|-------|-------|--------|
|                                      |                                   | N           | row%   | N                                | row%   | N                 | row%   | N                      | row%  | N       | row%  | N     | col%   |
| Total                                |                                   | 79          | 54.5%  | 67                               | 46.2%  | 59                | 40.7%  | 4                      | 2.8%  | 12      | 8.3%  | 145   | 100.0% |
| Geschlecht:                          | Weiblich                          | 62          | 56.9%  | 45                               | 41.3%  | 43                | 39.4%  | 3                      | 2.8%  | 11      | 10.1% | 109   | 75.2%  |
|                                      | Männlich                          | 17          | 48.6%  | 21                               | 60.0%  | 15                | 42.9%  | 1                      | 2.9%  | 1       | 2.9%  | 35    | 24.1%  |
|                                      | Keine Angabe                      |             |        | 1                                | 100.0% | 1                 | 100.0% |                        |       |         |       | 1     | 0.7%   |
|                                      |                                   |             |        |                                  |        |                   |        |                        |       |         |       |       |        |
| Altersgruppe:                        | bis 30 Jahre                      | 12          | 66.7%  | 10                               | 55.6%  | 5                 | 27.8%  | 1                      | 5.6%  | 2       | 11.1% | 18    | 12.4%  |
|                                      | 31 – 40 Jahre                     | 20          | 54.1%  | 17                               | 45.9%  | 18                | 48.6%  | 3                      | 8.1%  |         |       | 37    | 25.5%  |
|                                      | 41 – 45 Jahre                     | 17          | 58.6%  | 13                               | 44.8%  | 11                | 37.9%  |                        |       | 4       | 13.8% | 29    | 20.0%  |
|                                      | über 45 Jahre                     | 30          | 50.0%  | 26                               | 43.3%  | 24                | 40.0%  |                        |       | 6       | 10.0% | 60    | 41.4%  |
|                                      | Keine Angabe                      |             |        | 1                                | 100.0% | 1                 | 100.0% |                        |       |         |       | 1     | 0.7%   |
| höchste Berufsausbildung:            | Obligatorische Schule/Anlehre     | 6           | 50.0%  | 5                                | 41.7%  | 3                 | 25.0%  |                        |       | 1       | 8.3%  | 12    | 8.3%   |
|                                      | Berufslehre/ - schule             | 36          | 51.4%  | 32                               | 45.7%  | 32                | 45.7%  | 1                      | 1.4%  | 7       | 10.0% | 70    | 48.3%  |
|                                      | Höhere Fach- und Berufsausbildung | 23          | 56.1%  | 20                               | 48.8%  | 17                | 41.5%  |                        |       | 4       | 9.8%  | 41    | 28.3%  |
|                                      | Universität / Fachhochschule      | 13          | 65.0%  | 8                                | 40.0%  | 5                 | 25.0%  | 2                      | 10.0% |         |       | 20    | 13.8%  |
|                                      | Keine Angabe                      | 1           | 50.0%  | 2                                | 100.0% | 2                 | 100.0% | 1                      | 50.0% |         |       | 2     | 1.4%   |
| Form der MS:                         | RRMS                              | 74          | 55.2%  | 62                               | 46.3%  | 53                | 39.6%  | 3                      | 2.2%  | 11      | 8.2%  | 134   | 92.4%  |
|                                      | SPMS                              | 5           | 50.0%  | 4                                | 40.0%  | 5                 | 50.0%  | 1                      | 10.0% | 1       | 10.0% | 10    | 6.9%   |
|                                      | Keine Angabe                      |             |        | 1                                | 100.0% | 1                 | 100.0% |                        |       |         |       | 1     | 0.7%   |
| Dauer seit der Diagnose:             | < 12 Monate                       | 1           | 100.0% | 1                                | 100.0% | 1                 | 100.0% |                        |       |         |       | 1     | 0.7%   |
|                                      | 1 – 3 Jahre                       | 8           | 72.7%  | 5                                | 45.5%  | 3                 | 27.3%  | 2                      | 18.2% | 2       | 18.2% | 11    | 7.6%   |
|                                      | 3 – 5 Jahre                       | 10          | 55.6%  | 9                                | 50.0%  | 8                 | 44.4%  |                        |       | 1       | 5.6%  | 18    | 12.4%  |
|                                      | 5 – 10 Jahre                      | 24          | 63.2%  | 16                               | 42.1%  | 14                | 36.8%  | 1                      | 2.6%  | 2       | 5.3%  | 38    | 26.2%  |
|                                      | 10 – 15 Jahre                     | 16          | 51.6%  | 12                               | 38.7%  | 11                | 35.5%  |                        |       | 3       | 9.7%  | 31    | 21.4%  |
|                                      | > 15 Jahre                        | 20          | 44.4%  | 23                               | 51.1%  | 21                | 46.7%  | 1                      | 2.2%  | 4       | 8.9%  | 45    | 31.0%  |
|                                      | Keine Angabe                      |             |        | 1                                | 100.0% | 1                 | 100.0% |                        |       |         |       | 1     | 0.7%   |
| Gespräch mit Neurologe bei Diagnose: | sehr gut/gut                      | 36          | 50.0%  | 30                               | 41.7%  | 30                | 41.7%  | 4                      | 5.6%  | 6       | 8.3%  | 72    | 49.7%  |
|                                      | mittel                            | 8           | 42.1%  | 10                               | 52.6%  | 6                 | 31.6%  |                        |       | 5       | 26.3% | 19    | 13.1%  |
|                                      | schlecht/sehr schlecht            | 32          | 64.0%  | 26                               | 52.0%  | 20                | 40.0%  |                        |       | 1       | 2.0%  | 50    | 34.5%  |
|                                      | Keine Angabe                      | 3           | 75.0%  | 1                                | 25.0%  | 3                 | 75.0%  |                        |       |         |       | 4     | 2.8%   |

### 3.43 FRAGE 33: GRÜNDE FÜR EINEN WECHSEL DER ERSTHTHERAPIE NACH KEY VARIABLEN II

| 1 = sehr gut - 5 = sehr schlecht |                    | Wirksamkeit |        | Verträglichkeit / Nebenwirkungen |        | Art der Anwendung |        | Kinder/Familienplanun<br>g |       | Anderes |       | Total |        |
|----------------------------------|--------------------|-------------|--------|----------------------------------|--------|-------------------|--------|----------------------------|-------|---------|-------|-------|--------|
|                                  |                    | N           | row%   | N                                | row%   | N                 | row%   | N                          | row%  | N       | row%  | N     | col%   |
| Total                            |                    | 79          | 54.5%  | 67                               | 46.2%  | 59                | 40.7%  | 4                          | 2.8%  | 12      | 8.3%  | 145   | 100.0% |
| Zweitmeinung bei                 | ja                 | 18          | 56.3%  | 18                               | 56.3%  | 16                | 50.0%  | 1                          | 3.1%  | 4       | 12.5% | 32    | 22.1%  |
| Diagnose:                        | nein               | 60          | 54.5%  | 48                               | 43.6%  | 41                | 37.3%  | 3                          | 2.7%  | 7       | 6.4%  | 110   | 75.9%  |
|                                  | Keine Angabe       | 1           | 33.3%  | 1                                | 33.3%  | 2                 | 66.7%  |                            |       | 1       | 33.3% | 3     | 2.1%   |
| Therapieentscheid bei            | Injizierbare       | 64          | 51.2%  | 60                               | 48.0%  | 56                | 44.8%  | 3                          | 2.4%  | 10      | 8.0%  | 125   | 86.2%  |
| Erstdiagnose:                    | Gilenya            | 3           | 50.0%  | 1                                | 16.7%  | 1                 | 16.7%  | 1                          | 16.7% | 1       | 16.7% | 6     | 4.1%   |
|                                  | Tecfidera          | 7           | 87.5%  | 4                                | 50.0%  |                   |        |                            |       | 1       | 12.5% | 8     | 5.5%   |
|                                  | Tysabri            | 3           | 75.0%  | 1                                | 25.0%  | 1                 | 25.0%  |                            |       |         |       | 4     | 2.8%   |
|                                  | Andere             | 1           | 100.0% | 1                                | 100.0% | 1                 | 100.0% |                            |       |         |       | 1     | 0.7%   |
|                                  | Keine Angabe       | 1           | 100.0% |                                  |        |                   |        |                            |       |         |       | 1     | 0.7%   |
| Rebif bei                        | nein               | 54          | 57.4%  | 41                               | 43.6%  | 36                | 38.3%  | 3                          | 3.2%  | 6       | 6.4%  | 94    | 64.8%  |
| Erstdiagnose:                    | ja                 | 25          | 49.0%  | 26                               | 51.0%  | 23                | 45.1%  | 1                          | 2.0%  | 6       | 11.8% | 51    | 35.2%  |
| Aktuelle Behandlung:             | Aubagio            |             |        | 2                                | 66.7%  | 3                 | 100.0% |                            |       | 1       | 33.3% | 3     | 2.1%   |
|                                  | Injizierbare       | 3           | 21.4%  | 7                                | 50.0%  | 7                 | 50.0%  | 1                          | 7.1%  | 2       | 14.3% | 14    | 9.7%   |
|                                  | Gilenya            | 26          | 55.3%  | 19                               | 40.4%  | 21                | 44.7%  |                            |       | 4       | 8.5%  | 47    | 32.4%  |
|                                  | Tecfidera          | 5           | 33.3%  | 11                               | 73.3%  | 9                 | 60.0%  | 2                          | 13.3% | 1       | 6.7%  | 15    | 10.3%  |
|                                  | Tysabri            | 39          | 78.0%  | 18                               | 36.0%  | 12                | 24.0%  | 1                          | 2.0%  | 2       | 4.0%  | 50    | 34.5%  |
|                                  | Andere             | 1           | 50.0%  |                                  |        | 1                 | 50.0%  |                            |       |         |       | 2     | 1.4%   |
|                                  | keine Therapie     | 4           | 33.3%  | 9                                | 75.0%  | 4                 | 33.3%  |                            |       | 2       | 16.7% | 12    | 8.3%   |
|                                  | Keine Angabe       | 1           | 50.0%  | 1                                | 50.0%  | 2                 | 100.0% |                            |       |         |       | 2     | 1.4%   |
| Rebif ist aktuelle               | nein               | 79          | 55.6%  | 65                               | 45.8%  | 58                | 40.8%  | 4                          | 2.8%  | 12      | 8.5%  | 142   | 97.9%  |
| Behandlung:                      | ja                 |             |        | 2                                | 66.7%  | 1                 | 33.3%  |                            |       |         |       | 3     | 2.1%   |
| Anzahl MS Langzeit-              | Erste MS Therapie  | 4           | 80.0%  | 1                                | 20.0%  | 4                 | 80.0%  |                            |       |         |       | 5     | 3.4%   |
| Therapien:                       | Zweite MS Therapie | 42          | 51.9%  | 38                               | 46.9%  | 34                | 42.0%  | 3                          | 3.7%  | 7       | 8.6%  | 81    | 55.9%  |
|                                  | Dritte oder mehr   | 26          | 59.1%  | 19                               | 43.2%  | 16                | 36.4%  | 1                          | 2.3%  | 3       | 6.8%  | 44    | 30.3%  |
|                                  | Keine Angabe       | 7           | 46.7%  | 9                                | 60.0%  | 5                 | 33.3%  |                            |       | 2       | 13.3% | 15    | 10.3%  |
| Rückblickend gleiche             | ja                 | 39          | 51.3%  | 25                               | 32.9%  | 31                | 40.8%  | 2                          | 2.6%  | 6       | 7.9%  | 76    | 52.4%  |
| Therapie:                        | nein               | 29          | 55.8%  | 32                               | 61.5%  | 21                | 40.4%  | 2                          | 3.8%  | 4       | 7.7%  | 52    | 35.9%  |
|                                  | Keine Angabe       | 11          | 64.7%  | 10                               | 58.8%  | 7                 | 41.2%  |                            |       | 2       | 11.8% | 17    | 11.7%  |

### 3.44 FRAGE 33: LISTING DER GRÜNDE FÜR EINEN WECHSEL DER ERSTTHERAPIE FÜR REBIF

|    | Case ID | Rebif bei<br>Erstdiagnose: | Wirksamkeit | Verträglichkeit / Nebenwirkungen | Art der Anwendung | Kinder/Familienplanung | Anderes | Keine Angabe |
|----|---------|----------------------------|-------------|----------------------------------|-------------------|------------------------|---------|--------------|
| 1  | 03-026  | ja                         | .           | .                                | Art der Anwendung | .                      | .       | .            |
| 2  | 03-034  | ja                         | Wirksamkeit | .                                | Art der Anwendung | .                      | .       | .            |
| 3  | 03-036  | ja                         | .           | Verträglichkeit / Nebenwirkungen | Art der Anwendung | .                      | .       | .            |
| 4  | 05-021  | ja                         | .           | Verträglichkeit / Nebenwirkungen | Art der Anwendung | .                      | Anderes | .            |
| 5  | 05-024  | ja                         | .           | .                                | .                 | .                      | .       | .            |
| 6  | 05-034  | ja                         | .           | .                                | Art der Anwendung | .                      | .       | .            |
| 7  | 05-038  | ja                         | .           | .                                | .                 | .                      | .       | .            |
| 8  | 05-062  | ja                         | .           | Verträglichkeit / Nebenwirkungen | Art der Anwendung | .                      | .       | .            |
| 9  | 05-077  | ja                         | .           | Verträglichkeit / Nebenwirkungen | .                 | .                      | .       | .            |
| 10 | 05-100  | ja                         | .           | Verträglichkeit / Nebenwirkungen | .                 | .                      | .       | .            |
| 11 | 06-012  | ja                         | Wirksamkeit | .                                | Art der Anwendung | .                      | .       | .            |
| 12 | 06-016  | ja                         | .           | Verträglichkeit / Nebenwirkungen | .                 | .                      | .       | .            |
| 13 | 06-026  | ja                         | Wirksamkeit | .                                | .                 | .                      | .       | .            |
| 14 | 09-076  | ja                         | Wirksamkeit | Verträglichkeit / Nebenwirkungen | Art der Anwendung | .                      | .       | .            |
| 15 | 09-093  | ja                         | Wirksamkeit | .                                | .                 | .                      | .       | .            |
| 16 | 10-006  | ja                         | .           | .                                | Art der Anwendung | .                      | .       | .            |
| 17 | 10-007  | ja                         | Wirksamkeit | .                                | .                 | .                      | .       | .            |
| 18 | 10-008  | ja                         | Wirksamkeit | Verträglichkeit / Nebenwirkungen | .                 | .                      | .       | .            |
| 19 | 10-009  | ja                         | .           | Verträglichkeit / Nebenwirkungen | .                 | .                      | .       | .            |
| 20 | 10-012  | ja                         | Wirksamkeit | Verträglichkeit / Nebenwirkungen | .                 | .                      | Anderes | .            |
| 21 | 10-020  | ja                         | Wirksamkeit | Verträglichkeit / Nebenwirkungen | Art der Anwendung | .                      | .       | .            |
| 22 | 10-021  | ja                         | .           | .                                | .                 | .                      | .       | Keine Angabe |
| 23 | 12-004  | ja                         | Wirksamkeit | Verträglichkeit / Nebenwirkungen | .                 | .                      | .       | .            |
| 24 | 12-006  | ja                         | .           | .                                | Art der Anwendung | .                      | .       | .            |
| 25 | 12-007  | ja                         | .           | .                                | .                 | .                      | .       | .            |
| 26 | 12-015  | ja                         | Wirksamkeit | Verträglichkeit / Nebenwirkungen | Art der Anwendung | .                      | .       | .            |
| 27 | 12-027  | ja                         | .           | Verträglichkeit / Nebenwirkungen | .                 | .                      | .       | .            |
| 28 | 12-028  | ja                         | .           | .                                | .                 | .                      | .       | .            |
| 29 | 12-036  | ja                         | Wirksamkeit | Verträglichkeit / Nebenwirkungen | .                 | .                      | .       | .            |
| 30 | 12-038  | ja                         | .           | .                                | Art der Anwendung | .                      | .       | .            |
| 31 | 14-076  | ja                         | .           | .                                | .                 | .                      | .       | .            |
| 32 | 14-080  | ja                         | Wirksamkeit | Verträglichkeit / Nebenwirkungen | .                 | .                      | .       | .            |
| 33 | 14-083  | ja                         | Wirksamkeit | Verträglichkeit / Nebenwirkungen | .                 | .                      | .       | .            |
| 34 | 15-005  | ja                         | .           | .                                | .                 | .                      | .       | .            |
| 35 | 15-006  | ja                         | Wirksamkeit | .                                | .                 | .                      | .       | .            |

### 3.44 FRAGE 33: LISTING DER GRÜNDE FÜR EINEN WECHSEL DER ERSTHTERAPIE FÜR REBIF

|       | Case ID | Rebif bei<br>Erstdiagnose: | Wirksamkeit | Verträglichkeit / Nebenwirkungen | Art der Anwendung | Kinder/Familienplanung | Anderes | Keine Angabe |
|-------|---------|----------------------------|-------------|----------------------------------|-------------------|------------------------|---------|--------------|
| 36    | 15-008  | ja                         | .           | .                                | .                 | .                      | .       | Keine Angabe |
| 37    | 15-009  | ja                         | .           | Verträglichkeit / Nebenwirkungen | .                 | .                      | .       |              |
| 38    | 16-004  | ja                         | Wirksamkeit | .                                | Art der Anwendung | .                      | .       |              |
| 39    | 16-005  | ja                         | .           | Verträglichkeit / Nebenwirkungen | .                 | Kinder/Familienplanung | .       | .            |
| 40    | 16-006  | ja                         | .           | Verträglichkeit / Nebenwirkungen | Art der Anwendung |                        | .       | .            |
| 41    | 23-005  | ja                         | Wirksamkeit | .                                | .                 |                        | .       | .            |
| 42    | 23-008  | ja                         | Wirksamkeit | .                                | .                 | .                      | .       | .            |
| 43    | 23-009  | ja                         | Wirksamkeit | .                                | .                 | .                      | .       | .            |
| 44    | 23-011  | ja                         | .           | Verträglichkeit / Nebenwirkungen | .                 | .                      | Anderes | .            |
| 45    | 23-013  | ja                         | .           | .                                | .                 | .                      | Anderes | .            |
| 46    | 23-017  | ja                         | Wirksamkeit | .                                | .                 | .                      | .       | .            |
| 47    | 23-019  | ja                         | .           | .                                | Art der Anwendung | .                      | .       | .            |
| 48    | 23-024  | ja                         | .           | Verträglichkeit / Nebenwirkungen | .                 | .                      | .       | .            |
| 49    | 24-003  | ja                         | .           | Verträglichkeit / Nebenwirkungen | Art der Anwendung | .                      | Anderes | .            |
| 50    | 24-005  | ja                         | .           | .                                | Art der Anwendung | .                      | .       | .            |
| 51    | 24-009  | ja                         | .           | Verträglichkeit / Nebenwirkungen | Art der Anwendung | .                      | .       | .            |
| 52    | 24-010  | ja                         | Wirksamkeit | Verträglichkeit / Nebenwirkungen | Art der Anwendung | .                      | .       | .            |
| 53    | 24-012  | ja                         | Wirksamkeit | .                                | Art der Anwendung | .                      | .       | .            |
| 54    | 24-014  | ja                         | .           | .                                | .                 | .                      | .       | .            |
| 55    | 24-016  | ja                         | Wirksamkeit | .                                | .                 | .                      | .       | .            |
| 56    | 24-021  | ja                         | .           | .                                | Art der Anwendung | .                      | .       | .            |
| 57    | 24-024  | ja                         | .           | Verträglichkeit / Nebenwirkungen | Art der Anwendung | .                      | .       | .            |
| 58    | 25-001  | ja                         | Wirksamkeit | .                                | .                 | .                      | .       | .            |
| 59    | 25-032  | ja                         | .           | .                                | .                 | .                      | Anderes | .            |
| 60    | 27-026  | ja                         | Wirksamkeit | .                                | .                 | .                      | .       | .            |
| Total | N       | 60                         | 60          | 25                               | 26                | 23                     | 1       | 6            |
|       |         |                            |             |                                  |                   |                        |         | 2            |

**3.45 FRAGE 34: WIE OFT SEHEN SIE IHREN BEHANDELNDEN NEUROLOGEN NACH KEY VARIABLEN I**

|                                      |                                   | 34. Wie oft sehen sie Ihren behandelnden Neurologen? |       |                |        |                |       |                         |       |              |       | Total |        |
|--------------------------------------|-----------------------------------|------------------------------------------------------|-------|----------------|--------|----------------|-------|-------------------------|-------|--------------|-------|-------|--------|
|                                      |                                   | Weniger als 1 mal pro Jahr                           |       | 1 mal pro Jahr |        | 2 mal pro Jahr |       | Mehr als 2 mal pro Jahr |       | Keine Angabe |       | N     | col%   |
|                                      |                                   | N                                                    | row%  | N              | row%   | N              | row%  | N                       | row%  | N            | row%  |       |        |
| Total                                |                                   | 3                                                    | 1.4%  | 62             | 29.8%  | 51             | 24.5% | 80                      | 38.5% | 12           | 5.8%  | 208   | 100.0% |
| Geschlecht:                          | Weiblich                          | 3                                                    | 2.0%  | 46             | 30.3%  | 34             | 22.4% | 62                      | 40.8% | 7            | 4.6%  | 152   | 73.1%  |
|                                      | Männlich                          |                                                      |       | 15             | 27.8%  | 17             | 31.5% | 17                      | 31.5% | 5            | 9.3%  | 54    | 26.0%  |
|                                      | Keine Angabe                      |                                                      |       | 1              | 50.0%  |                |       | 1                       | 50.0% |              |       | 2     | 1.0%   |
|                                      |                                   |                                                      |       |                |        |                |       |                         |       |              |       |       |        |
| Altersgruppe:                        | bis 30 Jahre                      | 1                                                    | 3.1%  | 10             | 31.3%  | 5              | 15.6% | 13                      | 40.6% | 3            | 9.4%  | 32    | 15.4%  |
|                                      | 31 – 40 Jahre                     |                                                      |       | 14             | 25.9%  | 10             | 18.5% | 26                      | 48.1% | 4            | 7.4%  | 54    | 26.0%  |
|                                      | 41 – 45 Jahre                     | 1                                                    | 2.7%  | 11             | 29.7%  | 9              | 24.3% | 15                      | 40.5% | 1            | 2.7%  | 37    | 17.8%  |
|                                      | über 45 Jahre                     | 1                                                    | 1.2%  | 26             | 31.3%  | 27             | 32.5% | 25                      | 30.1% | 4            | 4.8%  | 83    | 39.9%  |
|                                      | Keine Angabe                      |                                                      |       | 1              | 50.0%  |                |       | 1                       | 50.0% |              |       | 2     | 1.0%   |
|                                      |                                   |                                                      |       |                |        |                |       |                         |       |              |       |       |        |
| höchste Berufsausbildung:            | Obligatorische Schule/Anlehre     |                                                      |       | 6              | 35.3%  | 5              | 29.4% | 6                       | 35.3% |              |       | 17    | 8.2%   |
|                                      | Berufslehre/ - schule             | 1                                                    | 1.0%  | 27             | 27.8%  | 21             | 21.6% | 41                      | 42.3% | 7            | 7.2%  | 97    | 46.6%  |
|                                      | Höhere Fach- und Berufsausbildung |                                                      |       | 20             | 34.5%  | 15             | 25.9% | 18                      | 31.0% | 5            | 8.6%  | 58    | 27.9%  |
|                                      | Universität / Fachhochschule      | 2                                                    | 6.1%  | 8              | 24.2%  | 9              | 27.3% | 14                      | 42.4% |              |       | 33    | 15.9%  |
|                                      | Keine Angabe                      |                                                      |       | 1              | 33.3%  | 1              | 33.3% | 1                       | 33.3% |              |       | 3     | 1.4%   |
| Form der MS:                         | CIS                               |                                                      |       |                |        | 1              | 20.0% | 2                       | 40.0% | 2            | 40.0% | 5     | 2.4%   |
|                                      | RRMS                              | 3                                                    | 1.6%  | 57             | 30.5%  | 45             | 24.1% | 73                      | 39.0% | 9            | 4.8%  | 187   | 89.9%  |
|                                      | SPMS                              |                                                      |       | 4              | 28.6%  | 4              | 28.6% | 5                       | 35.7% | 1            | 7.1%  | 14    | 6.7%   |
|                                      | Keine Angabe                      |                                                      |       | 1              | 50.0%  | 1              | 50.0% |                         |       |              |       | 2     | 1.0%   |
| Dauer seit der Diagnose:             | < 12 Monate                       | 1                                                    | 5.9%  | 1              | 5.9%   | 1              | 5.9%  | 8                       | 47.1% | 6            | 35.3% | 17    | 8.2%   |
|                                      | 1 – 3 Jahre                       |                                                      |       | 10             | 35.7%  | 6              | 21.4% | 11                      | 39.3% | 1            | 3.6%  | 28    | 13.5%  |
|                                      | 3 – 5 Jahre                       |                                                      |       | 11             | 39.3%  | 7              | 25.0% | 8                       | 28.6% | 2            | 7.1%  | 28    | 13.5%  |
|                                      | 5 – 10 Jahre                      | 1                                                    | 2.2%  | 14             | 31.1%  | 15             | 33.3% | 15                      | 33.3% |              |       | 45    | 21.6%  |
|                                      | 10 – 15 Jahre                     |                                                      |       | 10             | 29.4%  | 5              | 14.7% | 18                      | 52.9% | 1            | 2.9%  | 34    | 16.3%  |
|                                      | > 15 Jahre                        | 1                                                    | 1.8%  | 15             | 27.3%  | 17             | 30.9% | 20                      | 36.4% | 2            | 3.6%  | 55    | 26.4%  |
|                                      | Keine Angabe                      |                                                      |       | 1              | 100.0% |                |       |                         |       |              |       | 1     | 0.5%   |
| Gespräch mit Neurologe bei Diagnose: | sehr gut/gut                      | 2                                                    | 1.7%  | 38             | 32.8%  | 27             | 23.3% | 42                      | 36.2% | 7            | 6.0%  | 116   | 55.8%  |
|                                      | mittel                            |                                                      |       | 5              | 19.2%  | 11             | 42.3% | 9                       | 34.6% | 1            | 3.8%  | 26    | 12.5%  |
|                                      | schlecht/sehr schlecht            |                                                      |       | 19             | 31.1%  | 12             | 19.7% | 27                      | 44.3% | 3            | 4.9%  | 61    | 29.3%  |
|                                      | Keine Angabe                      | 1                                                    | 20.0% |                |        | 1              | 20.0% | 2                       | 40.0% | 1            | 20.0% | 5     | 2.4%   |

**3.46 FRAGE 34: WIE OFT SEHEN SIE IHREN BEHANDELNDEN NEUROLOGEN NACH KEY VARIABLEN II**

|                                     |                    | 34. Wie oft sehen sie Ihren behandelnden Neurologen? |       |                |       |                |       |                         |       |              |       | Total |        |
|-------------------------------------|--------------------|------------------------------------------------------|-------|----------------|-------|----------------|-------|-------------------------|-------|--------------|-------|-------|--------|
|                                     |                    | Weniger als 1 mal pro Jahr                           |       | 1 mal pro Jahr |       | 2 mal pro Jahr |       | Mehr als 2 mal pro Jahr |       | Keine Angabe |       | N     | col%   |
|                                     |                    | N                                                    | row%  | N              | row%  | N              | row%  | N                       | row%  | N            | row%  |       |        |
| Total                               |                    | 3                                                    | 1.4%  | 62             | 29.8% | 51             | 24.5% | 80                      | 38.5% | 12           | 5.8%  | 208   | 100.0% |
| Zweitmeinung bei Diagnose:          | ja                 | 1                                                    | 2.4%  | 15             | 36.6% | 11             | 26.8% | 14                      | 34.1% |              |       | 41    | 19.7%  |
|                                     | nein               | 2                                                    | 1.3%  | 47             | 29.9% | 39             | 24.8% | 63                      | 40.1% | 6            | 3.8%  | 157   | 75.5%  |
|                                     | Keine Angabe       |                                                      |       |                |       | 1              | 10.0% | 3                       | 30.0% | 6            | 60.0% | 10    | 4.8%   |
| Therapieentscheid bei Erstdiagnose: | Aubagio            |                                                      |       | 3              | 75.0% | 1              | 25.0% |                         |       |              |       | 4     | 1.9%   |
|                                     | Injizierbare       | 2                                                    | 1.3%  | 47             | 31.3% | 39             | 26.0% | 57                      | 38.0% | 5            | 3.3%  | 150   | 72.1%  |
|                                     | Gilenya            |                                                      |       | 7              | 31.8% | 7              | 31.8% | 6                       | 27.3% | 2            | 9.1%  | 22    | 10.6%  |
|                                     | Tecfidera          | 1                                                    | 7.1%  | 3              | 21.4% | 3              | 21.4% | 7                       | 50.0% |              |       | 14    | 6.7%   |
|                                     | Tysabri            |                                                      |       | 1              | 10.0% | 1              | 10.0% | 7                       | 70.0% | 1            | 10.0% | 10    | 4.8%   |
|                                     | Andere             |                                                      |       | 1              | 25.0% |                |       | 1                       | 25.0% | 2            | 50.0% | 4     | 1.9%   |
|                                     | Keine Angabe       |                                                      |       |                |       |                |       | 2                       | 50.0% | 2            | 50.0% | 4     | 1.9%   |
| Rebif bei Erstdiagnose:             | nein               | 2                                                    | 1.4%  | 48             | 32.4% | 33             | 22.3% | 55                      | 37.2% | 10           | 6.8%  | 148   | 71.2%  |
|                                     | ja                 | 1                                                    | 1.7%  | 14             | 23.3% | 18             | 30.0% | 25                      | 41.7% | 2            | 3.3%  | 60    | 28.8%  |
| Aktuelle Behandlung:                | Aubagio            |                                                      |       | 4              | 50.0% | 3              | 37.5% |                         |       | 1            | 12.5% | 8     | 3.8%   |
|                                     | Injizierbare       |                                                      |       | 19             | 50.0% | 9              | 23.7% | 7                       | 18.4% | 3            | 7.9%  | 38    | 18.3%  |
|                                     | Gilenya            | 1                                                    | 1.6%  | 21             | 32.8% | 22             | 34.4% | 17                      | 26.6% | 3            | 4.7%  | 64    | 30.8%  |
|                                     | Tecfidera          | 2                                                    | 10.0% | 11             | 55.0% | 3              | 15.0% | 4                       | 20.0% |              |       | 20    | 9.6%   |
|                                     | Tysabri            |                                                      |       | 2              | 3.6%  | 7              | 12.5% | 46                      | 82.1% | 1            | 1.8%  | 56    | 26.9%  |
|                                     | Andere             |                                                      |       |                |       | 1              | 50.0% | 1                       | 50.0% |              |       | 2     | 1.0%   |
|                                     | keine Therapie     |                                                      |       | 4              | 22.2% | 5              | 27.8% | 5                       | 27.8% | 4            | 22.2% | 18    | 8.7%   |
|                                     | Keine Angabe       |                                                      |       | 1              | 50.0% | 1              | 50.0% |                         |       |              |       | 2     | 1.0%   |
| Rebif ist aktuelle Behandlung:      | nein               | 3                                                    | 1.5%  | 58             | 29.6% | 45             | 23.0% | 79                      | 40.3% | 11           | 5.6%  | 196   | 94.2%  |
|                                     | ja                 |                                                      |       | 4              | 33.3% | 6              | 50.0% | 1                       | 8.3%  | 1            | 8.3%  | 12    | 5.8%   |
| Anzahl MS Langzeit-Therapien:       | Erste MS Therapie  | 1                                                    | 1.8%  | 24             | 43.6% | 15             | 27.3% | 11                      | 20.0% | 4            | 7.3%  | 55    | 26.4%  |
|                                     | Zweite MS Therapie | 1                                                    | 1.2%  | 23             | 27.4% | 20             | 23.8% | 38                      | 45.2% | 2            | 2.4%  | 84    | 40.4%  |
|                                     | Dritte oder mehr   |                                                      |       | 11             | 22.9% | 11             | 22.9% | 24                      | 50.0% | 2            | 4.2%  | 48    | 23.1%  |
|                                     | Keine Angabe       | 1                                                    | 4.8%  | 4              | 19.0% | 5              | 23.8% | 7                       | 33.3% | 4            | 19.0% | 21    | 10.1%  |
| Rückblickend gleiche Therapie:      | ja                 | 2                                                    | 1.6%  | 45             | 35.4% | 35             | 27.6% | 39                      | 30.7% | 6            | 4.7%  | 127   | 61.1%  |
|                                     | nein               |                                                      |       | 13             | 23.2% | 12             | 21.4% | 30                      | 53.6% | 1            | 1.8%  | 56    | 26.9%  |
|                                     | Keine Angabe       | 1                                                    | 4.0%  | 4              | 16.0% | 4              | 16.0% | 11                      | 44.0% | 5            | 20.0% | 25    | 12.0%  |

### 3.47 FRAGE 35: EINFLUSS DER FOLGENDEN FAKTOREN AUF DIE THERAPIETREUE

1 = kein Beitrag - 5 = starker Beitrag

|                                                   | Auswertbare Fragebogen |      |                       |        |         |               |               |         |
|---------------------------------------------------|------------------------|------|-----------------------|--------|---------|---------------|---------------|---------|
|                                                   | ja                     |      |                       |        |         |               |               |         |
|                                                   | Valid N                | Mean | Standard<br>Deviation | Median | Minimum | Percentile 25 | Percentile 75 | Maximum |
| Behandelnder Neurologe/ Behandelnde Neurologin    | 192                    | 4.4  | 1.1                   | 5.0    | 1.0     | 4.0           | 5.0           | 5.0     |
| Therapiebegleitung (MS Nurse/MS Pflegefachperson) | 141                    | 3.0  | 1.6                   | 3.0    | 1.0     | 1.0           | 5.0           | 5.0     |
| Familie / Freunde                                 | 174                    | 3.6  | 1.5                   | 4.0    | 1.0     | 3.0           | 5.0           | 5.0     |
| Wirksamkeit der Medikation (keine MS Symptome)    | 180                    | 4.7  | 0.7                   | 5.0    | 1.0     | 5.0           | 5.0           | 5.0     |
| Eigenmotivation                                   | 176                    | 4.4  | 1.0                   | 5.0    | 1.0     | 4.0           | 5.0           | 5.0     |
| Fortbildungsseminare                              | 141                    | 2.3  | 1.3                   | 2.0    | 1.0     | 1.0           | 3.0           | 5.0     |
| Internet-Foren                                    | 144                    | 2.2  | 1.3                   | 2.0    | 1.0     | 1.0           | 3.0           | 5.0     |

**3.48 FRAGE 36: HÄUFIGKEIT DER BEHANDLUNG SEIT DER DIAGNOSESTELLUNG NACH KEY VARIABLEN I**

|                                                                                               |                                             | 36. Wie lange waren Sie seit der Diagnosestellung ungefähr mit MS-Langzeittherapie behandelt? |        |                                             |        |                           |        |              |        | Total |        |
|-----------------------------------------------------------------------------------------------|---------------------------------------------|-----------------------------------------------------------------------------------------------|--------|---------------------------------------------|--------|---------------------------|--------|--------------|--------|-------|--------|
|                                                                                               |                                             | Ich war immer unter Behandlung (>75-100%)                                                     |        | Ich war nicht immer unter Behandlung (<75%) |        | Ich war nie in Behandlung |        | Keine Angabe |        | N     | col%   |
|                                                                                               |                                             | N                                                                                             | row%   | N                                           | row%   | N                         | row%   | N            | row%   |       |        |
| Total                                                                                         |                                             | 149                                                                                           | 71.3%  | 44                                          | 21.1%  | 2                         | 1.0%   | 14           | 6.7%   | 209   | 100.0% |
| 36. Wie lange waren Sie seit der Diagnosestellung ungefähr mit MS-Langzeittherapie behandelt? | Ich war immer unter Behandlung (>75-100%)   | 149                                                                                           | 100.0% |                                             |        |                           |        |              |        | 149   | 71.3%  |
|                                                                                               | Ich war meistens unter Behandlung (>50-75%) |                                                                                               |        | 29                                          | 100.0% |                           |        |              |        | 29    | 13.9%  |
|                                                                                               | Ich war öfters unter Behandlung (>25-50%)   |                                                                                               |        | 6                                           | 100.0% |                           |        |              |        | 6     | 2.9%   |
|                                                                                               | Ich war selten unter Behandlung (1-25%)     |                                                                                               |        | 9                                           | 100.0% |                           |        |              |        | 9     | 4.3%   |
|                                                                                               | Ich war nie in Behandlung                   |                                                                                               |        |                                             |        | 2                         | 100.0% |              |        | 2     | 1.0%   |
|                                                                                               | Keine Angabe                                |                                                                                               |        |                                             |        |                           |        | 14           | 100.0% | 14    | 6.7%   |
| Geschlecht:                                                                                   | Weiblich                                    | 109                                                                                           | 71.2%  | 37                                          | 24.2%  | 2                         | 1.3%   | 5            | 3.3%   | 153   | 73.2%  |
|                                                                                               | Männlich                                    | 39                                                                                            | 72.2%  | 7                                           | 13.0%  |                           |        | 8            | 14.8%  | 54    | 25.8%  |
|                                                                                               | Keine Angabe                                | 1                                                                                             | 50.0%  |                                             |        |                           |        | 1            | 50.0%  | 2     | 1.0%   |
| Altersgruppe:                                                                                 | bis 30 Jahre                                | 28                                                                                            | 84.8%  | 2                                           | 6.1%   |                           |        | 3            | 9.1%   | 33    | 15.8%  |
|                                                                                               | 31 – 40 Jahre                               | 33                                                                                            | 61.1%  | 14                                          | 25.9%  | 2                         | 3.7%   | 5            | 9.3%   | 54    | 25.8%  |
|                                                                                               | 41 – 45 Jahre                               | 25                                                                                            | 67.6%  | 11                                          | 29.7%  |                           |        | 1            | 2.7%   | 37    | 17.7%  |
|                                                                                               | über 45 Jahre                               | 62                                                                                            | 74.7%  | 17                                          | 20.5%  |                           |        | 4            | 4.8%   | 83    | 39.7%  |
|                                                                                               | Keine Angabe                                | 1                                                                                             | 50.0%  |                                             |        |                           |        | 1            | 50.0%  | 2     | 1.0%   |
|                                                                                               |                                             |                                                                                               |        |                                             |        |                           |        |              |        |       |        |
| höchste Berufsausbildung:                                                                     | Obligatorische Schule/Anlehre               | 14                                                                                            | 82.4%  | 2                                           | 11.8%  |                           |        | 1            | 5.9%   | 17    | 8.1%   |
|                                                                                               | Berufslehre/ - schule                       | 66                                                                                            | 68.0%  | 23                                          | 23.7%  |                           |        | 8            | 8.2%   | 97    | 46.4%  |
|                                                                                               | Höhere Fach- und Berufsausbildung           | 44                                                                                            | 74.6%  | 11                                          | 18.6%  | 1                         | 1.7%   | 3            | 5.1%   | 59    | 28.2%  |
|                                                                                               | Universität / Fachhochschule                | 23                                                                                            | 69.7%  | 8                                           | 24.2%  | 1                         | 3.0%   | 1            | 3.0%   | 33    | 15.8%  |
|                                                                                               | Keine Angabe                                | 2                                                                                             | 66.7%  |                                             |        |                           |        | 1            | 33.3%  | 3     | 1.4%   |
| Form der MS:                                                                                  | CIS                                         | 4                                                                                             | 80.0%  |                                             |        |                           |        | 1            | 20.0%  | 5     | 2.4%   |
|                                                                                               | RRMS                                        | 139                                                                                           | 73.9%  | 36                                          | 19.1%  | 2                         | 1.1%   | 11           | 5.9%   | 188   | 90.0%  |
|                                                                                               | SPMS                                        | 6                                                                                             | 42.9%  | 7                                           | 50.0%  |                           |        | 1            | 7.1%   | 14    | 6.7%   |
|                                                                                               | Keine Angabe                                |                                                                                               |        | 1                                           | 50.0%  |                           |        | 1            | 50.0%  | 2     | 1.0%   |
| Dauer seit der Diagnose:                                                                      | < 12 Monate                                 | 10                                                                                            | 58.8%  | 2                                           | 11.8%  | 1                         | 5.9%   | 4            | 23.5%  | 17    | 8.1%   |
|                                                                                               | 1 – 3 Jahre                                 | 22                                                                                            | 75.9%  | 4                                           | 13.8%  | 1                         | 3.4%   | 2            | 6.9%   | 29    | 13.9%  |
|                                                                                               | 3 – 5 Jahre                                 | 23                                                                                            | 82.1%  | 3                                           | 10.7%  |                           |        | 2            | 7.1%   | 28    | 13.4%  |
|                                                                                               | 5 – 10 Jahre                                | 36                                                                                            | 80.0%  | 7                                           | 15.6%  |                           |        | 2            | 4.4%   | 45    | 21.5%  |
|                                                                                               | 10 – 15 Jahre                               | 24                                                                                            | 70.6%  | 10                                          | 29.4%  |                           |        |              |        | 34    | 16.3%  |
|                                                                                               | > 15 Jahre                                  | 34                                                                                            | 61.8%  | 18                                          | 32.7%  |                           |        | 3            | 5.5%   | 55    | 26.3%  |
|                                                                                               | Keine Angabe                                |                                                                                               |        |                                             |        |                           |        | 1            | 100.0% | 1     | 0.5%   |
| Gespräch mit Neurologe bei Diagnose:                                                          | sehr gut/gut                                | 89                                                                                            | 76.1%  | 18                                          | 15.4%  | 2                         | 1.7%   | 8            | 6.8%   | 117   | 56.0%  |
|                                                                                               | mittel                                      | 12                                                                                            | 46.2%  | 12                                          | 46.2%  |                           |        | 2            | 7.7%   | 26    | 12.4%  |
|                                                                                               | schlecht/sehr schlecht                      | 43                                                                                            | 70.5%  | 14                                          | 23.0%  |                           |        | 4            | 6.6%   | 61    | 29.2%  |
|                                                                                               | Keine Angabe                                | 5                                                                                             | 100.0% |                                             |        |                           |        |              |        | 5     | 2.4%   |

### 3.49 FRAGE 36: HÄUFIGKEIT DER BEHANDLUNG SEIT DER DIAGNOSESTELLUNG NACH KEY VARIABLEN II

|                                     |                    | 36. Wie lange waren Sie seit der Diagnosestellung ungefähr mit MS-Langzeittherapie behandelt? |        |                                              |       |                           |      |              |       | Total |        |
|-------------------------------------|--------------------|-----------------------------------------------------------------------------------------------|--------|----------------------------------------------|-------|---------------------------|------|--------------|-------|-------|--------|
|                                     |                    | Ich war immer unter Behandlung (>75-100%)                                                     |        | Ich war nicht immer unter Behandlung (< 75%) |       | Ich war nie in Behandlung |      | Keine Angabe |       | N     | col%   |
|                                     |                    | N                                                                                             | row%   | N                                            | row%  | N                         | row% | N            | row%  |       |        |
| Total                               |                    | 149                                                                                           | 71.3%  | 44                                           | 21.1% | 2                         | 1.0% | 14           | 6.7%  | 209   | 100.0% |
| Zweitmeinung bei Diagnose:          | ja                 | 28                                                                                            | 68.3%  | 10                                           | 24.4% |                           |      | 3            | 7.3%  | 41    | 19.6%  |
|                                     | nein               | 118                                                                                           | 74.7%  | 31                                           | 19.6% | 2                         | 1.3% | 7            | 4.4%  | 158   | 75.6%  |
|                                     | Keine Angabe       | 3                                                                                             | 30.0%  | 3                                            | 30.0% |                           |      | 4            | 40.0% | 10    | 4.8%   |
| Therapieentscheid bei Erstdiagnose: | Aubagio            | 3                                                                                             | 75.0%  | 1                                            | 25.0% |                           |      |              |       | 4     | 1.9%   |
|                                     | Injizierbare       | 112                                                                                           | 74.2%  | 32                                           | 21.2% |                           |      | 7            | 4.6%  | 151   | 72.2%  |
|                                     | Gilenya            | 16                                                                                            | 72.7%  | 3                                            | 13.6% | 1                         | 4.5% | 2            | 9.1%  | 22    | 10.5%  |
|                                     | Tecfidera          | 9                                                                                             | 64.3%  | 3                                            | 21.4% | 1                         | 7.1% | 1            | 7.1%  | 14    | 6.7%   |
|                                     | Tysabri            | 7                                                                                             | 70.0%  | 3                                            | 30.0% |                           |      |              |       | 10    | 4.8%   |
|                                     | Andere             | 1                                                                                             | 25.0%  | 1                                            | 25.0% |                           |      | 2            | 50.0% | 4     | 1.9%   |
|                                     | Keine Angabe       | 1                                                                                             | 25.0%  | 1                                            | 25.0% |                           |      | 2            | 50.0% | 4     | 1.9%   |
| Rebif bei Erstdiagnose:             | nein               | 108                                                                                           | 72.5%  | 29                                           | 19.5% | 2                         | 1.3% | 10           | 6.7%  | 149   | 71.3%  |
|                                     | ja                 | 41                                                                                            | 68.3%  | 15                                           | 25.0% |                           |      | 4            | 6.7%  | 60    | 28.7%  |
| Aktuelle Behandlung:                | Aubagio            | 6                                                                                             | 75.0%  | 1                                            | 12.5% |                           |      | 1            | 12.5% | 8     | 3.8%   |
|                                     | Injizierbare       | 33                                                                                            | 84.6%  | 4                                            | 10.3% |                           |      | 2            | 5.1%  | 39    | 18.7%  |
|                                     | Gilenya            | 47                                                                                            | 73.4%  | 12                                           | 18.8% | 1                         | 1.6% | 4            | 6.3%  | 64    | 30.6%  |
|                                     | Tecfidera          | 13                                                                                            | 65.0%  | 5                                            | 25.0% |                           |      | 2            | 10.0% | 20    | 9.6%   |
|                                     | Tysabri            | 43                                                                                            | 76.8%  | 11                                           | 19.6% |                           |      | 2            | 3.6%  | 56    | 26.8%  |
|                                     | Andere             | 2                                                                                             | 100.0% |                                              |       |                           |      |              |       | 2     | 1.0%   |
|                                     | keine Therapie     | 3                                                                                             | 16.7%  | 11                                           | 61.1% | 1                         | 5.6% | 3            | 16.7% | 18    | 8.6%   |
|                                     | Keine Angabe       | 2                                                                                             | 100.0% |                                              |       |                           |      |              |       | 2     | 1.0%   |
| Rebif ist aktuelle Behandlung:      | nein               | 138                                                                                           | 70.1%  | 44                                           | 22.3% | 2                         | 1.0% | 13           | 6.6%  | 197   | 94.3%  |
|                                     | ja                 | 11                                                                                            | 91.7%  |                                              |       |                           |      | 1            | 8.3%  | 12    | 5.7%   |
| Anzahl MS Langzeit-Therapien:       | Erste MS Therapie  | 45                                                                                            | 80.4%  | 6                                            | 10.7% | 1                         | 1.8% | 4            | 7.1%  | 56    | 26.8%  |
|                                     | Zweite MS Therapie | 65                                                                                            | 77.4%  | 15                                           | 17.9% |                           |      | 4            | 4.8%  | 84    | 40.2%  |
|                                     | Dritte oder mehr   | 35                                                                                            | 72.9%  | 11                                           | 22.9% |                           |      | 2            | 4.2%  | 48    | 23.0%  |
|                                     | Keine Angabe       | 4                                                                                             | 19.0%  | 12                                           | 57.1% | 1                         | 4.8% | 4            | 19.0% | 21    | 10.0%  |
| Rückblickend gleiche Therapie:      | ja                 | 98                                                                                            | 76.6%  | 21                                           | 16.4% | 2                         | 1.6% | 7            | 5.5%  | 128   | 61.2%  |
|                                     | nein               | 37                                                                                            | 66.1%  | 19                                           | 33.9% |                           |      |              |       | 56    | 26.8%  |
|                                     | Keine Angabe       | 14                                                                                            | 56.0%  | 4                                            | 16.0% |                           |      | 7            | 28.0% | 25    | 12.0%  |

### 3.50 FRAGE 37: GLEICHER THERAPIEENTSCHEID IM RÜCKBLICK NACH KEY VARIABLEN I

|                                      |                                   | 37. Würden Sie sich rückblickend für die gleiche MS-Langzeittherapie nach Ihrer Erst-Diagnose entscheiden? |        |      |       |              |       | Total |        |
|--------------------------------------|-----------------------------------|------------------------------------------------------------------------------------------------------------|--------|------|-------|--------------|-------|-------|--------|
|                                      |                                   | Ja                                                                                                         |        | Nein |       | Keine Angabe |       | N     | col%   |
|                                      |                                   | N                                                                                                          | row%   | N    | row%  | N            | row%  |       |        |
| Total                                |                                   | 128                                                                                                        | 60.4%  | 56   | 26.4% | 28           | 13.2% | 212   | 100.0% |
| Geschlecht:                          | Weiblich                          | 94                                                                                                         | 60.6%  | 43   | 27.7% | 18           | 11.6% | 155   | 73.1%  |
|                                      | Männlich                          | 32                                                                                                         | 58.2%  | 13   | 23.6% | 10           | 18.2% | 55    | 25.9%  |
|                                      | Keine Angabe                      | 2                                                                                                          | 100.0% |      |       |              |       | 2     | 0.9%   |
|                                      |                                   |                                                                                                            |        |      |       |              |       |       |        |
| Altersgruppe:                        | bis 30 Jahre                      | 16                                                                                                         | 48.5%  | 14   | 42.4% | 3            | 9.1%  | 33    | 15.6%  |
|                                      | 31 – 40 Jahre                     | 33                                                                                                         | 58.9%  | 14   | 25.0% | 9            | 16.1% | 56    | 26.4%  |
|                                      | 41 – 45 Jahre                     | 18                                                                                                         | 48.6%  | 13   | 35.1% | 6            | 16.2% | 37    | 17.5%  |
|                                      | über 45 Jahre                     | 59                                                                                                         | 70.2%  | 15   | 17.9% | 10           | 11.9% | 84    | 39.6%  |
|                                      | Keine Angabe                      | 2                                                                                                          | 100.0% |      |       |              |       | 2     | 0.9%   |
| höchste Berufsausbildung:            | Obligatorische Schule/Anlehre     | 12                                                                                                         | 70.6%  | 4    | 23.5% | 1            | 5.9%  | 17    | 8.0%   |
|                                      | Berufslehre/ - schule             | 50                                                                                                         | 51.0%  | 32   | 32.7% | 16           | 16.3% | 98    | 46.2%  |
|                                      | Höhere Fach- und Berufsausbildung | 39                                                                                                         | 65.0%  | 12   | 20.0% | 9            | 15.0% | 60    | 28.3%  |
|                                      | Universität / Fachhochschule      | 25                                                                                                         | 73.5%  | 7    | 20.6% | 2            | 5.9%  | 34    | 16.0%  |
|                                      | Keine Angabe                      | 2                                                                                                          | 66.7%  | 1    | 33.3% |              |       | 3     | 1.4%   |
| Form der MS:                         | CIS                               | 4                                                                                                          | 80.0%  |      |       | 1            | 20.0% | 5     | 2.4%   |
|                                      | RRMS                              | 113                                                                                                        | 59.5%  | 53   | 27.9% | 24           | 12.6% | 190   | 89.6%  |
|                                      | SPMS                              | 9                                                                                                          | 60.0%  | 3    | 20.0% | 3            | 20.0% | 15    | 7.1%   |
|                                      | Keine Angabe                      | 2                                                                                                          | 100.0% |      |       |              |       | 2     | 0.9%   |
| Dauer seit der Diagnose:             | < 12 Monate                       | 12                                                                                                         | 66.7%  | 3    | 16.7% | 3            | 16.7% | 18    | 8.5%   |
|                                      | 1 – 3 Jahre                       | 18                                                                                                         | 62.1%  | 8    | 27.6% | 3            | 10.3% | 29    | 13.7%  |
|                                      | 3 – 5 Jahre                       | 17                                                                                                         | 60.7%  | 9    | 32.1% | 2            | 7.1%  | 28    | 13.2%  |
|                                      | 5 – 10 Jahre                      | 23                                                                                                         | 51.1%  | 14   | 31.1% | 8            | 17.8% | 45    | 21.2%  |
|                                      | 10 – 15 Jahre                     | 23                                                                                                         | 65.7%  | 10   | 28.6% | 2            | 5.7%  | 35    | 16.5%  |
|                                      | > 15 Jahre                        | 34                                                                                                         | 60.7%  | 12   | 21.4% | 10           | 17.9% | 56    | 26.4%  |
|                                      | Keine Angabe                      | 1                                                                                                          | 100.0% |      |       |              |       | 1     | 0.5%   |
| Gespräch mit Neurologe bei Diagnose: | sehr gut/gut                      | 80                                                                                                         | 67.8%  | 24   | 20.3% | 14           | 11.9% | 118   | 55.7%  |
|                                      | mittel                            | 15                                                                                                         | 57.7%  | 11   | 42.3% |              |       | 26    | 12.3%  |
|                                      | schlecht/sehr schlecht            | 31                                                                                                         | 49.2%  | 20   | 31.7% | 12           | 19.0% | 63    | 29.7%  |
|                                      | Keine Angabe                      | 2                                                                                                          | 40.0%  | 1    | 20.0% | 2            | 40.0% | 5     | 2.4%   |

### 3.51 FRAGE 37: GLEICHER THERAPIEENTSCHEID IM RÜCKBLICK NACH KEY VARIABLEN II

|                                     |                    | 37. Würden Sie sich rückblickend für die gleiche MS-Langzeittherapie nach Ihrer Erst-Diagnose entscheiden? |        |      |        |              |        | Total |        |
|-------------------------------------|--------------------|------------------------------------------------------------------------------------------------------------|--------|------|--------|--------------|--------|-------|--------|
|                                     |                    | Ja                                                                                                         |        | Nein |        | Keine Angabe |        | N     | col%   |
|                                     |                    | N                                                                                                          | row%   | N    | row%   | N            | row%   |       |        |
| Total                               |                    | 128                                                                                                        | 60.4%  | 56   | 26.4%  | 28           | 13.2%  | 212   | 100.0% |
| Zweitmeinung bei Diagnose:          | ja                 | 22                                                                                                         | 53.7%  | 12   | 29.3%  | 7            | 17.1%  | 41    | 19.3%  |
|                                     | nein               | 103                                                                                                        | 65.2%  | 41   | 25.9%  | 14           | 8.9%   | 158   | 74.5%  |
|                                     | Keine Angabe       | 3                                                                                                          | 23.1%  | 3    | 23.1%  | 7            | 53.8%  | 13    | 6.1%   |
|                                     |                    |                                                                                                            |        |      |        |              |        |       |        |
| Therapieentscheid bei Erstdiagnose: | Aubagio            | 4                                                                                                          | 100.0% |      |        |              |        | 4     | 1.9%   |
|                                     | Injizierbare       | 86                                                                                                         | 57.0%  | 45   | 29.8%  | 20           | 13.2%  | 151   | 71.2%  |
|                                     | Gilenya            | 18                                                                                                         | 81.8%  | 1    | 4.5%   | 3            | 13.6%  | 22    | 10.4%  |
|                                     | Tecfidera          | 7                                                                                                          | 50.0%  | 7    | 50.0%  |              |        | 14    | 6.6%   |
|                                     | Tysabri            | 9                                                                                                          | 90.0%  | 1    | 10.0%  |              |        | 10    | 4.7%   |
|                                     | Andere             | 2                                                                                                          | 50.0%  | 1    | 25.0%  | 1            | 25.0%  | 4     | 1.9%   |
|                                     | Keine Angabe       | 2                                                                                                          | 28.6%  | 1    | 14.3%  | 4            | 57.1%  | 7     | 3.3%   |
| Rebif bei Erstdiagnose:             | nein               | 99                                                                                                         | 65.1%  | 35   | 23.0%  | 18           | 11.8%  | 152   | 71.7%  |
|                                     | ja                 | 29                                                                                                         | 48.3%  | 21   | 35.0%  | 10           | 16.7%  | 60    | 28.3%  |
| Aktuelle Behandlung:                | Aubagio            | 5                                                                                                          | 62.5%  |      |        | 3            | 37.5%  | 8     | 3.8%   |
|                                     | Injizierbare       | 34                                                                                                         | 87.2%  | 2    | 5.1%   | 3            | 7.7%   | 39    | 18.4%  |
|                                     | Gilenya            | 35                                                                                                         | 54.7%  | 21   | 32.8%  | 8            | 12.5%  | 64    | 30.2%  |
|                                     | Tecfidera          | 15                                                                                                         | 75.0%  | 5    | 25.0%  |              |        | 20    | 9.4%   |
|                                     | Tysabri            | 30                                                                                                         | 52.6%  | 18   | 31.6%  | 9            | 15.8%  | 57    | 26.9%  |
|                                     | Andere             | 1                                                                                                          | 33.3%  | 1    | 33.3%  | 1            | 33.3%  | 3     | 1.4%   |
|                                     | keine Therapie     | 6                                                                                                          | 31.6%  | 9    | 47.4%  | 4            | 21.1%  | 19    | 9.0%   |
|                                     | Keine Angabe       | 2                                                                                                          | 100.0% |      |        |              |        | 2     | 0.9%   |
| Rebif ist aktuelle Behandlung:      | nein               | 117                                                                                                        | 58.5%  | 55   | 27.5%  | 28           | 14.0%  | 200   | 94.3%  |
|                                     | ja                 | 11                                                                                                         | 91.7%  | 1    | 8.3%   |              |        | 12    | 5.7%   |
| Anzahl MS Langzeit-Therapien:       | Erste MS Therapie  | 49                                                                                                         | 84.5%  | 2    | 3.4%   | 7            | 12.1%  | 58    | 27.4%  |
|                                     | Zweite MS Therapie | 49                                                                                                         | 58.3%  | 26   | 31.0%  | 9            | 10.7%  | 84    | 39.6%  |
|                                     | Dritte oder mehr   | 24                                                                                                         | 50.0%  | 18   | 37.5%  | 6            | 12.5%  | 48    | 22.6%  |
|                                     | Keine Angabe       | 6                                                                                                          | 27.3%  | 10   | 45.5%  | 6            | 27.3%  | 22    | 10.4%  |
| Rückblickend gleiche Therapie:      | ja                 | 128                                                                                                        | 100.0% |      |        |              |        | 128   | 60.4%  |
|                                     | nein               |                                                                                                            |        | 56   | 100.0% |              |        | 56    | 26.4%  |
|                                     | Keine Angabe       |                                                                                                            |        |      |        | 28           | 100.0% | 28    | 13.2%  |

### 3.52 FRAGE 38: ZUFRIEDENHEIT MIT DER MOMENTANEN THERAPIEWahl NACH KEY VARIABLEN I

| 1 = sehr zufrieden - 5 = überhaupt nicht zufrieden |                                   | 38. Wie sehr sind Sie mit momentanen Therapiewahl zufrieden? |       |    |       |    |        |    |       |   |      | Total |        |
|----------------------------------------------------|-----------------------------------|--------------------------------------------------------------|-------|----|-------|----|--------|----|-------|---|------|-------|--------|
|                                                    |                                   | 1                                                            |       | 2  |       | 3  |        | 4  |       | 5 |      | N     | col%   |
|                                                    |                                   | N                                                            | row%  | N  | row%  | N  | row%   | N  | row%  | N | row% |       |        |
| Total                                              |                                   | 111                                                          | 58.4% | 35 | 18.4% | 27 | 14.2%  | 10 | 5.3%  | 7 | 3.7% | 190   | 100.0% |
| Geschlecht:                                        | Weiblich                          | 83                                                           | 59.3% | 27 | 19.3% | 19 | 13.6%  | 7  | 5.0%  | 4 | 2.9% | 140   | 73.7%  |
|                                                    | Männlich                          | 27                                                           | 56.3% | 8  | 16.7% | 7  | 14.6%  | 3  | 6.3%  | 3 | 6.3% | 48    | 25.3%  |
|                                                    | Keine Angabe                      | 1                                                            | 50.0% |    |       | 1  | 50.0%  |    |       |   |      | 2     | 1.1%   |
|                                                    |                                   |                                                              |       |    |       |    |        |    |       |   |      |       |        |
| Altersgruppe:                                      | bis 30 Jahre                      | 17                                                           | 54.8% | 7  | 22.6% | 5  | 16.1%  | 1  | 3.2%  | 1 | 3.2% | 31    | 16.3%  |
|                                                    | 31 – 40 Jahre                     | 27                                                           | 58.7% | 9  | 19.6% | 6  | 13.0%  | 2  | 4.3%  | 2 | 4.3% | 46    | 24.2%  |
|                                                    | 41 – 45 Jahre                     | 21                                                           | 61.8% | 5  | 14.7% | 2  | 5.9%   | 3  | 8.8%  | 3 | 8.8% | 34    | 17.9%  |
|                                                    | über 45 Jahre                     | 45                                                           | 58.4% | 14 | 18.2% | 13 | 16.9%  | 4  | 5.2%  | 1 | 1.3% | 77    | 40.5%  |
|                                                    | Keine Angabe                      | 1                                                            | 50.0% |    |       | 1  | 50.0%  |    |       |   |      | 2     | 1.1%   |
| höchste Berufsausbildung:                          | Obligatorische Schule/Anlehre     | 10                                                           | 66.7% | 4  | 26.7% | 1  | 6.7%   |    |       |   |      | 15    | 7.9%   |
|                                                    | Berufslehre/ - schule             | 53                                                           | 61.6% | 11 | 12.8% | 15 | 17.4%  | 6  | 7.0%  | 1 | 1.2% | 86    | 45.3%  |
|                                                    | Höhere Fach- und Berufsausbildung | 31                                                           | 55.4% | 12 | 21.4% | 6  | 10.7%  | 3  | 5.4%  | 4 | 7.1% | 56    | 29.5%  |
|                                                    | Universität / Fachhochschule      | 16                                                           | 53.3% | 8  | 26.7% | 3  | 10.0%  | 1  | 3.3%  | 2 | 6.7% | 30    | 15.8%  |
|                                                    | Keine Angabe                      | 1                                                            | 33.3% |    |       | 2  | 66.7%  |    |       |   |      | 3     | 1.6%   |
| Form der MS:                                       | CIS                               |                                                              |       | 2  | 66.7% | 1  | 33.3%  |    |       |   |      | 3     | 1.6%   |
|                                                    | RRMS                              | 105                                                          | 60.0% | 33 | 18.9% | 21 | 12.0%  | 9  | 5.1%  | 7 | 4.0% | 175   | 92.1%  |
|                                                    | SPMS                              | 5                                                            | 50.0% |    |       | 4  | 40.0%  | 1  | 10.0% |   |      | 10    | 5.3%   |
|                                                    | Keine Angabe                      | 1                                                            | 50.0% |    |       | 1  | 50.0%  |    |       |   |      | 2     | 1.1%   |
| Dauer seit der Diagnose:                           | < 12 Monate                       | 5                                                            | 38.5% | 4  | 30.8% | 3  | 23.1%  |    |       | 1 | 7.7% | 13    | 6.8%   |
|                                                    | 1 – 3 Jahre                       | 16                                                           | 55.2% | 6  | 20.7% | 3  | 10.3%  | 3  | 10.3% | 1 | 3.4% | 29    | 15.3%  |
|                                                    | 3 – 5 Jahre                       | 17                                                           | 68.0% | 5  | 20.0% | 2  | 8.0%   | 1  | 4.0%  |   |      | 25    | 13.2%  |
|                                                    | 5 – 10 Jahre                      | 28                                                           | 65.1% | 7  | 16.3% | 5  | 11.6%  | 2  | 4.7%  | 1 | 2.3% | 43    | 22.6%  |
|                                                    | 10 – 15 Jahre                     | 17                                                           | 54.8% | 4  | 12.9% | 6  | 19.4%  | 2  | 6.5%  | 2 | 6.5% | 31    | 16.3%  |
|                                                    | > 15 Jahre                        | 28                                                           | 58.3% | 9  | 18.8% | 7  | 14.6%  | 2  | 4.2%  | 2 | 4.2% | 48    | 25.3%  |
|                                                    | Keine Angabe                      |                                                              |       |    |       | 1  | 100.0% |    |       |   |      | 1     | 0.5%   |
| Gespräch mit Neurologe bei Diagnose:               | sehr gut/gut                      | 70                                                           | 66.0% | 18 | 17.0% | 12 | 11.3%  | 3  | 2.8%  | 3 | 2.8% | 106   | 55.8%  |
|                                                    | mittel                            | 10                                                           | 43.5% | 6  | 26.1% | 3  | 13.0%  | 2  | 8.7%  | 2 | 8.7% | 23    | 12.1%  |
|                                                    | schlecht/sehr schlecht            | 28                                                           | 49.1% | 10 | 17.5% | 12 | 21.1%  | 5  | 8.8%  | 2 | 3.5% | 57    | 30.0%  |
|                                                    | Keine Angabe                      | 3                                                            | 75.0% | 1  | 25.0% |    |        |    |       |   |      | 4     | 2.1%   |

### 3.53 FRAGE 38: ZUFRIEDENHEIT MIT DER MOMENTANEN THERAPIEWAHL NACH KEY VARIABLEN II

| 1 = sehr zufrieden - 5 = überhaupt nicht zufrieden |                    | 38. Wie sehr sind Sie mit momentanen Therapiewahl zufrieden? |        |    |       |    |       |    |       |   |       | Total |        |
|----------------------------------------------------|--------------------|--------------------------------------------------------------|--------|----|-------|----|-------|----|-------|---|-------|-------|--------|
|                                                    |                    | 1                                                            |        | 2  |       | 3  |       | 4  |       | 5 |       | N     | col%   |
|                                                    |                    | N                                                            | row%   | N  | row%  | N  | row%  | N  | row%  | N | row%  |       |        |
| Total                                              |                    | 111                                                          | 58.4%  | 35 | 18.4% | 27 | 14.2% | 10 | 5.3%  | 7 | 3.7%  | 190   | 100.0% |
| Zweitmeinung bei                                   | ja                 | 19                                                           | 52.8%  | 9  | 25.0% | 5  | 13.9% | 2  | 5.6%  | 1 | 2.8%  | 36    | 18.9%  |
| Diagnose:                                          | nein               | 90                                                           | 60.8%  | 25 | 16.9% | 20 | 13.5% | 7  | 4.7%  | 6 | 4.1%  | 148   | 77.9%  |
|                                                    | Keine Angabe       | 2                                                            | 33.3%  | 1  | 16.7% | 2  | 33.3% | 1  | 16.7% |   |       | 6     | 3.2%   |
| Therapieentscheid bei                              | Aubagio            | 4                                                            | 100.0% |    |       |    |       |    |       |   |       | 4     | 2.1%   |
| Erstdiagnose:                                      | Injizierbare       | 75                                                           | 54.0%  | 27 | 19.4% | 24 | 17.3% | 7  | 5.0%  | 6 | 4.3%  | 139   | 73.2%  |
|                                                    | Gilenya            | 14                                                           | 73.7%  | 4  | 21.1% |    |       | 1  | 5.3%  |   |       | 19    | 10.0%  |
|                                                    | Tecfidera          | 7                                                            | 53.8%  | 2  | 15.4% | 1  | 7.7%  | 2  | 15.4% | 1 | 7.7%  | 13    | 6.8%   |
|                                                    | Tysabri            | 6                                                            | 66.7%  | 2  | 22.2% | 1  | 11.1% |    |       |   |       | 9     | 4.7%   |
|                                                    | Andere             | 2                                                            | 66.7%  |    |       | 1  | 33.3% |    |       |   |       | 3     | 1.6%   |
|                                                    | Keine Angabe       | 3                                                            | 100.0% |    |       |    |       |    |       |   |       | 3     | 1.6%   |
| Rebif bei                                          | nein               | 80                                                           | 58.0%  | 26 | 18.8% | 20 | 14.5% | 7  | 5.1%  | 5 | 3.6%  | 138   | 72.6%  |
| Erstdiagnose:                                      | ja                 | 31                                                           | 59.6%  | 9  | 17.3% | 7  | 13.5% | 3  | 5.8%  | 2 | 3.8%  | 52    | 27.4%  |
| Aktuelle Behandlung:                               | Aubagio            | 6                                                            | 85.7%  |    |       |    |       |    |       | 1 | 14.3% | 7     | 3.7%   |
|                                                    | Injizierbare       | 14                                                           | 37.8%  | 10 | 27.0% | 9  | 24.3% | 3  | 8.1%  | 1 | 2.7%  | 37    | 19.5%  |
|                                                    | Gilenya            | 36                                                           | 59.0%  | 11 | 18.0% | 8  | 13.1% | 4  | 6.6%  | 2 | 3.3%  | 61    | 32.1%  |
|                                                    | Tecfidera          | 12                                                           | 63.2%  | 3  | 15.8% | 3  | 15.8% |    |       | 1 | 5.3%  | 19    | 10.0%  |
|                                                    | Tysabri            | 35                                                           | 64.8%  | 10 | 18.5% | 5  | 9.3%  | 2  | 3.7%  | 2 | 3.7%  | 54    | 28.4%  |
|                                                    | Andere             | 2                                                            | 100.0% |    |       |    |       |    |       |   |       | 2     | 1.1%   |
|                                                    | keine Therapie     | 4                                                            | 50.0%  | 1  | 12.5% | 2  | 25.0% | 1  | 12.5% |   |       | 8     | 4.2%   |
|                                                    | Keine Angabe       | 2                                                            | 100.0% |    |       |    |       |    |       |   |       | 2     | 1.1%   |
| Rebif ist aktuelle                                 | nein               | 106                                                          | 59.2%  | 32 | 17.9% | 25 | 14.0% | 9  | 5.0%  | 7 | 3.9%  | 179   | 94.2%  |
| Behandlung:                                        | ja                 | 5                                                            | 45.5%  | 3  | 27.3% | 2  | 18.2% | 1  | 9.1%  |   |       | 11    | 5.8%   |
| Anzahl MS Langzeit-                                | Erste MS Therapie  | 34                                                           | 63.0%  | 8  | 14.8% | 7  | 13.0% | 3  | 5.6%  | 2 | 3.7%  | 54    | 28.4%  |
| Therapien:                                         | Zweite MS Therapie | 50                                                           | 61.7%  | 14 | 17.3% | 11 | 13.6% | 3  | 3.7%  | 3 | 3.7%  | 81    | 42.6%  |
|                                                    | Dritte oder mehr   | 23                                                           | 51.1%  | 11 | 24.4% | 6  | 13.3% | 3  | 6.7%  | 2 | 4.4%  | 45    | 23.7%  |
|                                                    | Keine Angabe       | 4                                                            | 40.0%  | 2  | 20.0% | 3  | 30.0% | 1  | 10.0% |   |       | 10    | 5.3%   |
| Rückblickend gleiche                               | ja                 | 75                                                           | 60.5%  | 22 | 17.7% | 16 | 12.9% | 4  | 3.2%  | 7 | 5.6%  | 124   | 65.3%  |
| Therapie:                                          | nein               | 26                                                           | 53.1%  | 10 | 20.4% | 8  | 16.3% | 5  | 10.2% |   |       | 49    | 25.8%  |
|                                                    | Keine Angabe       | 10                                                           | 58.8%  | 3  | 17.6% | 3  | 17.6% | 1  | 5.9%  |   |       | 17    | 8.9%   |

### 3.54 FRAGE 38: ZUFRIEDENHEIT (KENNZAHLEN) MIT DER MOMENTANEN THERAPIEWahl NACH KEY VARIABLEN I

| 1 = sehr zufrieden - 5: überhaupt nicht zufrieden |                                   | 38. Wie sehr sind Sie mit momentanen Therapiewahl zufrieden? |      |        |               |         |                |                |         |
|---------------------------------------------------|-----------------------------------|--------------------------------------------------------------|------|--------|---------------|---------|----------------|----------------|---------|
|                                                   |                                   | Count                                                        | Mean | Median | Std Deviation | Minimum | Lower quartile | Upper quartile | Maximum |
| Total                                             |                                   | N=190                                                        | 1.8  | 1.0    | 1.11          | 1       | 1.0            | 2.0            | 5       |
| Geschlecht:                                       | Weiblich                          | N=140                                                        | 1.7  | 1.0    | 1.06          | 1       | 1.0            | 2.0            | 5       |
|                                                   | Männlich                          | N=48                                                         | 1.9  | 1.0    | 1.24          | 1       | 1.0            | 3.0            | 5       |
|                                                   | Keine Angabe                      | N=2                                                          | 2.0  | 2.0    | 1.41          | 1       | 1.0            |                | 3       |
|                                                   |                                   |                                                              |      |        |               |         |                |                |         |
| Altersgruppe:                                     | bis 30 Jahre                      | N=31                                                         | 1.8  | 1.0    | 1.06          | 1       | 1.0            | 2.0            | 5       |
|                                                   | 31 – 40 Jahre                     | N=46                                                         | 1.8  | 1.0    | 1.12          | 1       | 1.0            | 2.0            | 5       |
|                                                   | 41 – 45 Jahre                     | N=34                                                         | 1.9  | 1.0    | 1.37          | 1       | 1.0            | 2.3            | 5       |
|                                                   | über 45 Jahre                     | N=77                                                         | 1.7  | 1.0    | 1.01          | 1       | 1.0            | 2.0            | 5       |
|                                                   | Keine Angabe                      | N=2                                                          | 2.0  | 2.0    | 1.41          | 1       | 1.0            |                | 3       |
|                                                   |                                   |                                                              |      |        |               |         |                |                |         |
| höchste Berufsausbildung:                         | Obligatorische Schule/Anlehre     | N=15                                                         | 1.4  | 1.0    | 0.63          | 1       | 1.0            | 2.0            | 3       |
|                                                   | Berufslehre/ - schule             | N=86                                                         | 1.7  | 1.0    | 1.06          | 1       | 1.0            | 3.0            | 5       |
|                                                   | Höhere Fach- und Berufsausbildung | N=56                                                         | 1.9  | 1.0    | 1.24          | 1       | 1.0            | 2.0            | 5       |
|                                                   | Universität / Fachhochschule      | N=30                                                         | 1.8  | 1.0    | 1.18          | 1       | 1.0            | 2.0            | 5       |
|                                                   | Keine Angabe                      | N=3                                                          | 2.3  | 3.0    | 1.15          | 1       | 1.0            |                | 3       |
|                                                   |                                   |                                                              |      |        |               |         |                |                |         |
| Form der MS:                                      | CIS                               | N=3                                                          | 2.3  | 2.0    | 0.58          | 2       | 2.0            |                | 3       |
|                                                   | RRMS                              | N=175                                                        | 1.7  | 1.0    | 1.11          | 1       | 1.0            | 2.0            | 5       |
|                                                   | SPMS                              | N=10                                                         | 2.1  | 2.0    | 1.20          | 1       | 1.0            | 3.0            | 4       |
|                                                   | Keine Angabe                      | N=2                                                          | 2.0  | 2.0    | 1.41          | 1       | 1.0            |                | 3       |
|                                                   |                                   |                                                              |      |        |               |         |                |                |         |
| Dauer seit der Diagnose:                          | < 12 Monate                       | N=13                                                         | 2.1  | 2.0    | 1.19          | 1       | 1.0            | 3.0            | 5       |
|                                                   | 1 – 3 Jahre                       | N=29                                                         | 1.9  | 1.0    | 1.19          | 1       | 1.0            | 2.5            | 5       |
|                                                   | 3 – 5 Jahre                       | N=25                                                         | 1.5  | 1.0    | 0.82          | 1       | 1.0            | 2.0            | 4       |
|                                                   | 5 – 10 Jahre                      | N=43                                                         | 1.6  | 1.0    | 1.02          | 1       | 1.0            | 2.0            | 5       |
|                                                   | 10 – 15 Jahre                     | N=31                                                         | 2.0  | 1.0    | 1.28          | 1       | 1.0            | 3.0            | 5       |
|                                                   | > 15 Jahre                        | N=48                                                         | 1.8  | 1.0    | 1.12          | 1       | 1.0            | 2.0            | 5       |
|                                                   | Keine Angabe                      | N=1                                                          | 3.0  | 3.0    |               | 3       | 3.0            | 3.0            | 3       |
|                                                   |                                   |                                                              |      |        |               |         |                |                |         |
| Gespräch mit Neurologe bei Diagnose:              | sehr gut/gut                      | N=106                                                        | 1.6  | 1.0    | 0.99          | 1       | 1.0            | 2.0            | 5       |
|                                                   | mittel                            | N=23                                                         | 2.1  | 2.0    | 1.32          | 1       | 1.0            | 3.0            | 5       |
|                                                   | schlecht/sehr schlecht            | N=57                                                         | 2.0  | 2.0    | 1.18          | 1       | 1.0            | 3.0            | 5       |
|                                                   | Keine Angabe                      | N=4                                                          | 1.3  | 1.0    | 0.50          | 1       | 1.0            | 1.8            | 2       |

### 3.55 FRAGE 38: ZUFRIEDENHEIT (KENNZAHLEN) MIT DER MOMENTANEN THERAPIEWahl NACH KEY VARIABLEN II

|                                                   |                    |       | 38. Wie sehr sind Sie mit momentanen Therapiewahl zufrieden? |      |        |               |         |                |                |         |
|---------------------------------------------------|--------------------|-------|--------------------------------------------------------------|------|--------|---------------|---------|----------------|----------------|---------|
|                                                   |                    |       | Count                                                        | Mean | Median | Std Deviation | Minimum | Lower quartile | Upper quartile | Maximum |
| 1 = sehr zufrieden - 5: überhaupt nicht zufrieden |                    |       |                                                              |      |        |               |         |                |                |         |
| Total                                             |                    |       | N=190                                                        | 1.8  | 1.0    | 1.11          | 1       | 1.0            | 2.0            | 5       |
| Zweitmeinung bei Diagnose:                        | ja                 | N=36  | 1.8                                                          | 1.0  | 1.06   | 1             | 1.0     | 2.0            | 5              |         |
|                                                   | nein               | N=148 | 1.7                                                          | 1.0  | 1.11   | 1             | 1.0     | 2.0            | 5              |         |
|                                                   | Keine Angabe       | N=6   | 2.3                                                          | 2.5  | 1.21   | 1             | 1.0     | 3.3            | 4              |         |
|                                                   |                    |       |                                                              |      |        |               |         |                |                |         |
| Therapieentscheid bei Erstdiagnose:               | Aubagio            | N=4   | 1.0                                                          | 1.0  | 0.00   | 1             | 1.0     | 1.0            | 1              |         |
|                                                   | Injizierbare       | N=139 | 1.9                                                          | 1.0  | 1.14   | 1             | 1.0     | 3.0            | 5              |         |
|                                                   | Gilenya            | N=19  | 1.4                                                          | 1.0  | 0.76   | 1             | 1.0     | 2.0            | 4              |         |
|                                                   | Tecfidera          | N=13  | 2.1                                                          | 1.0  | 1.44   | 1             | 1.0     | 3.5            | 5              |         |
|                                                   | Tysabri            | N=9   | 1.4                                                          | 1.0  | 0.73   | 1             | 1.0     | 2.0            | 3              |         |
|                                                   | Andere             | N=3   | 1.7                                                          | 1.0  | 1.15   | 1             | 1.0     |                | 3              |         |
|                                                   | Keine Angabe       | N=3   | 1.0                                                          | 1.0  | 0.00   | 1             | 1.0     | 1.0            | 1              |         |
|                                                   |                    |       |                                                              |      |        |               |         |                |                |         |
| Rebif bei Erstdiagnose:                           | nein               | N=138 | 1.8                                                          | 1.0  | 1.10   | 1             | 1.0     | 2.0            | 5              |         |
|                                                   | ja                 | N=52  | 1.8                                                          | 1.0  | 1.13   | 1             | 1.0     | 2.0            | 5              |         |
| Aktuelle Behandlung:                              | Aubagio            | N=7   | 1.6                                                          | 1.0  | 1.51   | 1             | 1.0     | 1.0            | 5              |         |
|                                                   | Injizierbare       | N=37  | 2.1                                                          | 2.0  | 1.10   | 1             | 1.0     | 3.0            | 5              |         |
|                                                   | Gilenya            | N=61  | 1.8                                                          | 1.0  | 1.12   | 1             | 1.0     | 2.0            | 5              |         |
|                                                   | Tecfidera          | N=19  | 1.7                                                          | 1.0  | 1.11   | 1             | 1.0     | 2.0            | 5              |         |
|                                                   | Tysabri            | N=54  | 1.6                                                          | 1.0  | 1.05   | 1             | 1.0     | 2.0            | 5              |         |
|                                                   | Andere             | N=2   | 1.0                                                          | 1.0  | 0.00   | 1             | 1.0     | 1.0            | 1              |         |
|                                                   | keine Therapie     | N=8   | 2.0                                                          | 1.5  | 1.20   | 1             | 1.0     | 3.0            | 4              |         |
|                                                   | Keine Angabe       | N=2   | 1.0                                                          | 1.0  | 0.00   | 1             | 1.0     | 1.0            | 1              |         |
|                                                   |                    |       |                                                              |      |        |               |         |                |                |         |
| Rebif ist aktuelle Behandlung:                    | nein               | N=179 | 1.8                                                          | 1.0  | 1.11   | 1             | 1.0     | 2.0            | 5              |         |
|                                                   | ja                 | N=11  | 1.9                                                          | 2.0  | 1.04   | 1             | 1.0     | 3.0            | 4              |         |
| Anzahl MS Langzeit-Therapien:                     | Erste MS Therapie  | N=54  | 1.7                                                          | 1.0  | 1.12   | 1             | 1.0     | 2.0            | 5              |         |
|                                                   | Zweite MS Therapie | N=81  | 1.7                                                          | 1.0  | 1.08   | 1             | 1.0     | 2.0            | 5              |         |
|                                                   | Dritte oder mehr   | N=45  | 1.9                                                          | 1.0  | 1.15   | 1             | 1.0     | 2.5            | 5              |         |
|                                                   | Keine Angabe       | N=10  | 2.1                                                          | 2.0  | 1.10   | 1             | 1.0     | 3.0            | 4              |         |
| Rückblickend gleiche Therapie:                    | ja                 | N=124 | 1.8                                                          | 1.0  | 1.15   | 1             | 1.0     | 2.0            | 5              |         |
|                                                   | nein               | N=49  | 1.8                                                          | 1.0  | 1.05   | 1             | 1.0     | 3.0            | 4              |         |
|                                                   | Keine Angabe       | N=17  | 1.7                                                          | 1.0  | 0.99   | 1             | 1.0     | 2.5            | 4              |         |

**3.56 FRAGE 39: ZUFRIEDENHEIT MIT DER BEHANDLUNG UND BETREUUNG IM GESAMTEN NACH KEY VARIABLEN I**

| 1 = sehr zufrieden - 5 = überhaupt nicht zufrieden |                                   | 39. Wie sehr sind Sie mit der Behandlung und Betreuung im Gesamten zufrieden? |       |    |       |    |        |    |       |   |       | Total |        |
|----------------------------------------------------|-----------------------------------|-------------------------------------------------------------------------------|-------|----|-------|----|--------|----|-------|---|-------|-------|--------|
|                                                    |                                   | 1                                                                             |       | 2  |       | 3  |        | 4  |       | 5 |       | N     | col%   |
|                                                    |                                   | N                                                                             | row%  | N  | row%  | N  | row%   | N  | row%  | N | row%  |       |        |
| Total                                              |                                   | 116                                                                           | 57.7% | 48 | 23.9% | 17 | 8.5%   | 14 | 7.0%  | 6 | 3.0%  | 201   | 100.0% |
| Geschlecht:                                        | Weiblich                          | 87                                                                            | 58.8% | 34 | 23.0% | 12 | 8.1%   | 10 | 6.8%  | 5 | 3.4%  | 148   | 73.6%  |
|                                                    | Männlich                          | 28                                                                            | 54.9% | 14 | 27.5% | 4  | 7.8%   | 4  | 7.8%  | 1 | 2.0%  | 51    | 25.4%  |
|                                                    | Keine Angabe                      | 1                                                                             | 50.0% |    |       | 1  | 50.0%  |    |       |   |       | 2     | 1.0%   |
|                                                    |                                   |                                                                               |       |    |       |    |        |    |       |   |       |       |        |
| Altersgruppe:                                      | bis 30 Jahre                      | 16                                                                            | 50.0% | 10 | 31.3% | 4  | 12.5%  | 2  | 6.3%  |   |       | 32    | 15.9%  |
|                                                    | 31 – 40 Jahre                     | 31                                                                            | 58.5% | 13 | 24.5% | 4  | 7.5%   | 4  | 7.5%  | 1 | 1.9%  | 53    | 26.4%  |
|                                                    | 41 – 45 Jahre                     | 21                                                                            | 61.8% | 7  | 20.6% |    |        | 3  | 8.8%  | 3 | 8.8%  | 34    | 16.9%  |
|                                                    | über 45 Jahre                     | 47                                                                            | 58.8% | 18 | 22.5% | 8  | 10.0%  | 5  | 6.3%  | 2 | 2.5%  | 80    | 39.8%  |
|                                                    | Keine Angabe                      | 1                                                                             | 50.0% |    |       | 1  | 50.0%  |    |       |   |       | 2     | 1.0%   |
| höchste Berufsausbildung:                          | Obligatorische Schule/Anlehre     | 12                                                                            | 75.0% | 2  | 12.5% | 1  | 6.3%   |    |       | 1 | 6.3%  | 16    | 8.0%   |
|                                                    | Berufslehre/ - schule             | 49                                                                            | 54.4% | 21 | 23.3% | 11 | 12.2%  | 8  | 8.9%  | 1 | 1.1%  | 90    | 44.8%  |
|                                                    | Höhere Fach- und Berufsausbildung | 33                                                                            | 55.9% | 16 | 27.1% | 3  | 5.1%   | 4  | 6.8%  | 3 | 5.1%  | 59    | 29.4%  |
|                                                    | Universität / Fachhochschule      | 21                                                                            | 63.6% | 8  | 24.2% | 1  | 3.0%   | 2  | 6.1%  | 1 | 3.0%  | 33    | 16.4%  |
|                                                    | Keine Angabe                      | 1                                                                             | 33.3% | 1  | 33.3% | 1  | 33.3%  |    |       |   |       | 3     | 1.5%   |
| Form der MS:                                       | CIS                               | 1                                                                             | 20.0% | 1  | 20.0% | 2  | 40.0%  | 1  | 20.0% |   |       | 5     | 2.5%   |
|                                                    | RRMS                              | 108                                                                           | 59.7% | 44 | 24.3% | 12 | 6.6%   | 11 | 6.1%  | 6 | 3.3%  | 181   | 90.0%  |
|                                                    | SPMS                              | 6                                                                             | 46.2% | 3  | 23.1% | 2  | 15.4%  | 2  | 15.4% |   |       | 13    | 6.5%   |
|                                                    | Keine Angabe                      | 1                                                                             | 50.0% |    |       | 1  | 50.0%  |    |       |   |       | 2     | 1.0%   |
| Dauer seit der Diagnose:                           | < 12 Monate                       | 8                                                                             | 50.0% | 2  | 12.5% | 4  | 25.0%  | 1  | 6.3%  | 1 | 6.3%  | 16    | 8.0%   |
|                                                    | 1 – 3 Jahre                       | 14                                                                            | 48.3% | 8  | 27.6% | 3  | 10.3%  | 4  | 13.8% |   |       | 29    | 14.4%  |
|                                                    | 3 – 5 Jahre                       | 16                                                                            | 61.5% | 9  | 34.6% |    |        | 1  | 3.8%  |   |       | 26    | 12.9%  |
|                                                    | 5 – 10 Jahre                      | 28                                                                            | 65.1% | 10 | 23.3% | 3  | 7.0%   | 1  | 2.3%  | 1 | 2.3%  | 43    | 21.4%  |
|                                                    | 10 – 15 Jahre                     | 20                                                                            | 57.1% | 10 | 28.6% |    |        | 4  | 11.4% | 1 | 2.9%  | 35    | 17.4%  |
|                                                    | > 15 Jahre                        | 30                                                                            | 58.8% | 9  | 17.6% | 6  | 11.8%  | 3  | 5.9%  | 3 | 5.9%  | 51    | 25.4%  |
|                                                    | Keine Angabe                      |                                                                               |       |    |       | 1  | 100.0% |    |       |   |       | 1     | 0.5%   |
| Gespräch mit Neurologe bei Diagnose:               | sehr gut/gut                      | 77                                                                            | 68.8% | 24 | 21.4% | 4  | 3.6%   | 4  | 3.6%  | 3 | 2.7%  | 112   | 55.7%  |
|                                                    | mittel                            | 10                                                                            | 41.7% | 8  | 33.3% | 3  | 12.5%  | 3  | 12.5% |   |       | 24    | 11.9%  |
|                                                    | schlecht/sehr schlecht            | 26                                                                            | 43.3% | 15 | 25.0% | 10 | 16.7%  | 7  | 11.7% | 2 | 3.3%  | 60    | 29.9%  |
|                                                    | Keine Angabe                      | 3                                                                             | 60.0% | 1  | 20.0% |    |        |    |       | 1 | 20.0% | 5     | 2.5%   |

**3.57 FRAGE 39: ZUFRIEDENHEIT MIT DER BEHANDLUNG UND BETREUUNG IM GESAMTEN NACH KEY VARIABLEN II**

| 1 = sehr zufrieden - 5 = überhaupt nicht zufrieden |                    | 39. Wie sehr sind Sie mit der Behandlung und Betreuung im Gesamten zufrieden? |        |    |       |    |       |    |       |   |       | Total |        |
|----------------------------------------------------|--------------------|-------------------------------------------------------------------------------|--------|----|-------|----|-------|----|-------|---|-------|-------|--------|
|                                                    |                    | 1                                                                             |        | 2  |       | 3  |       | 4  |       | 5 |       | N     | col%   |
|                                                    |                    | N                                                                             | row%   | N  | row%  | N  | row%  | N  | row%  | N | row%  |       |        |
| Total                                              |                    | 116                                                                           | 57.7%  | 48 | 23.9% | 17 | 8.5%  | 14 | 7.0%  | 6 | 3.0%  | 201   | 100.0% |
| Zweitmeinung bei                                   | ja                 | 17                                                                            | 47.2%  | 11 | 30.6% | 5  | 13.9% | 2  | 5.6%  | 1 | 2.8%  | 36    | 17.9%  |
| Diagnose:                                          | nein               | 94                                                                            | 60.3%  | 36 | 23.1% | 11 | 7.1%  | 10 | 6.4%  | 5 | 3.2%  | 156   | 77.6%  |
|                                                    | Keine Angabe       | 5                                                                             | 55.6%  | 1  | 11.1% | 1  | 11.1% | 2  | 22.2% |   |       | 9     | 4.5%   |
| Therapieentscheid bei                              | Aubagio            | 3                                                                             | 75.0%  | 1  | 25.0% |    |       |    |       |   |       | 4     | 2.0%   |
| Erstdiagnose:                                      | Injizierbare       | 79                                                                            | 54.9%  | 37 | 25.7% | 14 | 9.7%  | 10 | 6.9%  | 4 | 2.8%  | 144   | 71.6%  |
|                                                    | Gilenya            | 14                                                                            | 70.0%  | 3  | 15.0% | 1  | 5.0%  | 2  | 10.0% |   |       | 20    | 10.0%  |
|                                                    | Tecfidera          | 5                                                                             | 35.7%  | 5  | 35.7% | 1  | 7.1%  | 2  | 14.3% | 1 | 7.1%  | 14    | 7.0%   |
|                                                    | Tysabri            | 7                                                                             | 70.0%  | 1  | 10.0% | 1  | 10.0% |    |       | 1 | 10.0% | 10    | 5.0%   |
|                                                    | Andere             | 2                                                                             | 100.0% |    |       |    |       |    |       |   |       | 2     | 1.0%   |
|                                                    | Keine Angabe       | 6                                                                             | 85.7%  | 1  | 14.3% |    |       |    |       |   |       | 7     | 3.5%   |
| Rebif bei                                          | nein               | 83                                                                            | 56.8%  | 34 | 23.3% | 14 | 9.6%  | 11 | 7.5%  | 4 | 2.7%  | 146   | 72.6%  |
| Erstdiagnose:                                      | ja                 | 33                                                                            | 60.0%  | 14 | 25.5% | 3  | 5.5%  | 3  | 5.5%  | 2 | 3.6%  | 55    | 27.4%  |
| Aktuelle Behandlung:                               | Aubagio            | 6                                                                             | 75.0%  | 2  | 25.0% |    |       |    |       |   |       | 8     | 4.0%   |
|                                                    | Injizierbare       | 18                                                                            | 47.4%  | 10 | 26.3% | 5  | 13.2% | 5  | 13.2% |   |       | 38    | 18.9%  |
|                                                    | Gilenya            | 31                                                                            | 51.7%  | 16 | 26.7% | 6  | 10.0% | 5  | 8.3%  | 2 | 3.3%  | 60    | 29.9%  |
|                                                    | Tecfidera          | 13                                                                            | 65.0%  | 5  | 25.0% | 1  | 5.0%  |    |       | 1 | 5.0%  | 20    | 10.0%  |
|                                                    | Tysabri            | 37                                                                            | 66.1%  | 12 | 21.4% | 2  | 3.6%  | 2  | 3.6%  | 3 | 5.4%  | 56    | 27.9%  |
|                                                    | Andere             | 3                                                                             | 100.0% |    |       |    |       |    |       |   |       | 3     | 1.5%   |
|                                                    | keine Therapie     | 6                                                                             | 42.9%  | 3  | 21.4% | 3  | 21.4% | 2  | 14.3% |   |       | 14    | 7.0%   |
|                                                    | Keine Angabe       | 2                                                                             | 100.0% |    |       |    |       |    |       |   |       | 2     | 1.0%   |
| Rebif ist aktuelle                                 | nein               | 110                                                                           | 57.9%  | 44 | 23.2% | 17 | 8.9%  | 13 | 6.8%  | 6 | 3.2%  | 190   | 94.5%  |
| Behandlung:                                        | ja                 | 6                                                                             | 54.5%  | 4  | 36.4% |    |       | 1  | 9.1%  |   |       | 11    | 5.5%   |
| Anzahl MS Langzeit-                                | Erste MS Therapie  | 34                                                                            | 60.7%  | 10 | 17.9% | 6  | 10.7% | 5  | 8.9%  | 1 | 1.8%  | 56    | 27.9%  |
| Therapien:                                         | Zweite MS Therapie | 47                                                                            | 57.3%  | 25 | 30.5% | 5  | 6.1%  | 3  | 3.7%  | 2 | 2.4%  | 82    | 40.8%  |
|                                                    | Dritte oder mehr   | 29                                                                            | 61.7%  | 8  | 17.0% | 3  | 6.4%  | 4  | 8.5%  | 3 | 6.4%  | 47    | 23.4%  |
|                                                    | Keine Angabe       | 6                                                                             | 37.5%  | 5  | 31.3% | 3  | 18.8% | 2  | 12.5% |   |       | 16    | 8.0%   |
| Rückblickend gleiche                               | ja                 | 80                                                                            | 62.5%  | 27 | 21.1% | 10 | 7.8%  | 7  | 5.5%  | 4 | 3.1%  | 128   | 63.7%  |
| Therapie:                                          | nein               | 26                                                                            | 51.0%  | 15 | 29.4% | 4  | 7.8%  | 5  | 9.8%  | 1 | 2.0%  | 51    | 25.4%  |
|                                                    | Keine Angabe       | 10                                                                            | 45.5%  | 6  | 27.3% | 3  | 13.6% | 2  | 9.1%  | 1 | 4.5%  | 22    | 10.9%  |

### 3.58 FRAGE 39: ZUFRIEDENHEIT (KENNZAHLEN) MIT DER BEHANDLUNG UND BETREUUNG IM GESAMTEN NACH KEY VARIABLEN I

|                                                   |                                   | 39. Wie sehr sind Sie mit der Behandlung und Betreuung im Gesamten zufrieden? |      |        |               |         |                |                |         |
|---------------------------------------------------|-----------------------------------|-------------------------------------------------------------------------------|------|--------|---------------|---------|----------------|----------------|---------|
|                                                   |                                   | Count                                                                         | Mean | Median | Std Deviation | Minimum | Lower quartile | Upper quartile | Maximum |
| 1 = sehr zufrieden - 5: überhaupt nicht zufrieden |                                   |                                                                               |      |        |               |         |                |                |         |
| Total                                             |                                   | N=201                                                                         | 1.7  | 1.0    | 1.07          | 1       | 1.0            | 2.0            | 5       |
| Geschlecht:                                       | Weiblich                          | N=148                                                                         | 1.7  | 1.0    | 1.09          | 1       | 1.0            | 2.0            | 5       |
|                                                   | Männlich                          | N=51                                                                          | 1.7  | 1.0    | 1.04          | 1       | 1.0            | 2.0            | 5       |
|                                                   | Keine Angabe                      | N=2                                                                           | 2.0  | 2.0    | 1.41          | 1       | 1.0            |                | 3       |
| Altersgruppe:                                     | bis 30 Jahre                      | N=32                                                                          | 1.8  | 1.5    | 0.92          | 1       | 1.0            | 2.0            | 4       |
|                                                   | 31 – 40 Jahre                     | N=53                                                                          | 1.7  | 1.0    | 1.03          | 1       | 1.0            | 2.0            | 5       |
|                                                   | 41 – 45 Jahre                     | N=34                                                                          | 1.8  | 1.0    | 1.34          | 1       | 1.0            | 2.0            | 5       |
|                                                   | über 45 Jahre                     | N=80                                                                          | 1.7  | 1.0    | 1.05          | 1       | 1.0            | 2.0            | 5       |
|                                                   | Keine Angabe                      | N=2                                                                           | 2.0  | 2.0    | 1.41          | 1       | 1.0            |                | 3       |
|                                                   |                                   |                                                                               |      |        |               |         |                |                |         |
| höchste Berufsausbildung:                         | Obligatorische Schule/Anlehre     | N=16                                                                          | 1.5  | 1.0    | 1.10          | 1       | 1.0            | 1.8            | 5       |
|                                                   | Berufslehre/ - schule             | N=90                                                                          | 1.8  | 1.0    | 1.04          | 1       | 1.0            | 2.0            | 5       |
|                                                   | Höhere Fach- und Berufsausbildung | N=59                                                                          | 1.8  | 1.0    | 1.15          | 1       | 1.0            | 2.0            | 5       |
|                                                   | Universität / Fachhochschule      | N=33                                                                          | 1.6  | 1.0    | 1.03          | 1       | 1.0            | 2.0            | 5       |
|                                                   | Keine Angabe                      | N=3                                                                           | 2.0  | 2.0    | 1.00          | 1       | 1.0            |                | 3       |
| Form der MS:                                      | CIS                               | N=5                                                                           | 2.6  | 3.0    | 1.14          | 1       | 1.5            | 3.5            | 4       |
|                                                   | RRMS                              | N=181                                                                         | 1.7  | 1.0    | 1.06          | 1       | 1.0            | 2.0            | 5       |
|                                                   | SPMS                              | N=13                                                                          | 2.0  | 2.0    | 1.15          | 1       | 1.0            | 3.0            | 4       |
|                                                   | Keine Angabe                      | N=2                                                                           | 2.0  | 2.0    | 1.41          | 1       | 1.0            |                | 3       |
| Dauer seit der Diagnose:                          | < 12 Monate                       | N=16                                                                          | 2.1  | 1.5    | 1.29          | 1       | 1.0            | 3.0            | 5       |
|                                                   | 1 – 3 Jahre                       | N=29                                                                          | 1.9  | 2.0    | 1.08          | 1       | 1.0            | 2.5            | 4       |
|                                                   | 3 – 5 Jahre                       | N=26                                                                          | 1.5  | 1.0    | 0.71          | 1       | 1.0            | 2.0            | 4       |
|                                                   | 5 – 10 Jahre                      | N=43                                                                          | 1.5  | 1.0    | 0.91          | 1       | 1.0            | 2.0            | 5       |
|                                                   | 10 – 15 Jahre                     | N=35                                                                          | 1.7  | 1.0    | 1.12          | 1       | 1.0            | 2.0            | 5       |
|                                                   | > 15 Jahre                        | N=51                                                                          | 1.8  | 1.0    | 1.21          | 1       | 1.0            | 2.0            | 5       |
|                                                   | Keine Angabe                      | N=1                                                                           | 3.0  | 3.0    |               | 3       | 3.0            | 3.0            | 3       |
| Gespräch mit Neurologe bei Diagnose:              | sehr gut/gut                      | N=112                                                                         | 1.5  | 1.0    | 0.93          | 1       | 1.0            | 2.0            | 5       |
|                                                   | mittel                            | N=24                                                                          | 2.0  | 2.0    | 1.04          | 1       | 1.0            | 2.8            | 4       |
|                                                   | schlecht/sehr schlecht            | N=60                                                                          | 2.1  | 2.0    | 1.18          | 1       | 1.0            | 3.0            | 5       |
|                                                   | Keine Angabe                      | N=5                                                                           | 2.0  | 1.0    | 1.73          | 1       | 1.0            | 3.5            | 5       |

### 3.59 FRAGE 39: ZUFRIEDENHEIT (KENNZAHLEN) MIT DER BEHANDLUNG UND BETREUUNG IM GESAMTEN NACH KEY VARIABLEN II

|                                                   |                    |       | 39. Wie sehr sind Sie mit der Behandlung und Betreuung im Gesamten zufrieden? |      |        |               |         |                |                |         |
|---------------------------------------------------|--------------------|-------|-------------------------------------------------------------------------------|------|--------|---------------|---------|----------------|----------------|---------|
|                                                   |                    |       | Count                                                                         | Mean | Median | Std Deviation | Minimum | Lower quartile | Upper quartile | Maximum |
| 1 = sehr zufrieden - 5: überhaupt nicht zufrieden |                    |       |                                                                               |      |        |               |         |                |                |         |
| Total                                             |                    |       | N=201                                                                         | 1.7  | 1.0    | 1.07          | 1       | 1.0            | 2.0            | 5       |
| Zweitmeinung bei Diagnose:                        | ja                 | N=36  | 1.9                                                                           | 2.0  | 1.05   | 1             | 1.0     | 2.0            | 5              |         |
|                                                   | nein               | N=156 | 1.7                                                                           | 1.0  | 1.06   | 1             | 1.0     | 2.0            | 5              |         |
|                                                   | Keine Angabe       | N=9   | 2.0                                                                           | 1.0  | 1.32   | 1             | 1.0     | 3.5            | 4              |         |
| Therapieentscheid bei Erstdiagnose:               | Aubagio            | N=4   | 1.3                                                                           | 1.0  | 0.50   | 1             | 1.0     | 1.8            | 2              |         |
|                                                   | Injizierbare       | N=144 | 1.8                                                                           | 1.0  | 1.06   | 1             | 1.0     | 2.0            | 5              |         |
|                                                   | Gilenya            | N=20  | 1.6                                                                           | 1.0  | 1.00   | 1             | 1.0     | 2.0            | 4              |         |
|                                                   | Tecfidera          | N=14  | 2.2                                                                           | 2.0  | 1.31   | 1             | 1.0     | 3.3            | 5              |         |
|                                                   | Tysabri            | N=10  | 1.7                                                                           | 1.0  | 1.34   | 1             | 1.0     | 2.3            | 5              |         |
|                                                   | Andere             | N=2   | 1.0                                                                           | 1.0  | 0.00   | 1             | 1.0     | 1.0            | 1              |         |
|                                                   | Keine Angabe       | N=7   | 1.1                                                                           | 1.0  | 0.38   | 1             | 1.0     | 1.0            | 2              |         |
| Rebif bei Erstdiagnose:                           | nein               | N=146 | 1.8                                                                           | 1.0  | 1.08   | 1             | 1.0     | 2.0            | 5              |         |
|                                                   | ja                 | N=55  | 1.7                                                                           | 1.0  | 1.06   | 1             | 1.0     | 2.0            | 5              |         |
| Aktuelle Behandlung:                              | Aubagio            | N=8   | 1.3                                                                           | 1.0  | 0.46   | 1             | 1.0     | 1.8            | 2              |         |
|                                                   | Injizierbare       | N=38  | 1.9                                                                           | 2.0  | 1.08   | 1             | 1.0     | 3.0            | 4              |         |
|                                                   | Gilenya            | N=60  | 1.9                                                                           | 1.0  | 1.12   | 1             | 1.0     | 2.0            | 5              |         |
|                                                   | Tecfidera          | N=20  | 1.6                                                                           | 1.0  | 1.00   | 1             | 1.0     | 2.0            | 5              |         |
|                                                   | Tysabri            | N=56  | 1.6                                                                           | 1.0  | 1.09   | 1             | 1.0     | 2.0            | 5              |         |
|                                                   | Andere             | N=3   | 1.0                                                                           | 1.0  | 0.00   | 1             | 1.0     | 1.0            | 1              |         |
|                                                   | keine Therapie     | N=14  | 2.1                                                                           | 2.0  | 1.14   | 1             | 1.0     | 3.0            | 4              |         |
|                                                   | Keine Angabe       | N=2   | 1.0                                                                           | 1.0  | 0.00   | 1             | 1.0     | 1.0            | 1              |         |
| Rebif ist aktuelle Behandlung:                    | nein               | N=190 | 1.7                                                                           | 1.0  | 1.08   | 1             | 1.0     | 2.0            | 5              |         |
|                                                   | ja                 | N=11  | 1.6                                                                           | 1.0  | 0.92   | 1             | 1.0     | 2.0            | 4              |         |
| Anzahl MS Langzeit-Therapien:                     | Erste MS Therapie  | N=56  | 1.7                                                                           | 1.0  | 1.09   | 1             | 1.0     | 2.0            | 5              |         |
|                                                   | Zweite MS Therapie | N=82  | 1.6                                                                           | 1.0  | 0.94   | 1             | 1.0     | 2.0            | 5              |         |
|                                                   | Dritte oder mehr   | N=47  | 1.8                                                                           | 1.0  | 1.26   | 1             | 1.0     | 2.0            | 5              |         |
|                                                   | Keine Angabe       | N=16  | 2.1                                                                           | 2.0  | 1.06   | 1             | 1.0     | 3.0            | 4              |         |
| Rückblickend gleiche Therapie:                    | ja                 | N=128 | 1.7                                                                           | 1.0  | 1.05   | 1             | 1.0     | 2.0            | 5              |         |
|                                                   | nein               | N=51  | 1.8                                                                           | 1.0  | 1.07   | 1             | 1.0     | 2.0            | 5              |         |
|                                                   | Keine Angabe       | N=22  | 2.0                                                                           | 2.0  | 1.20   | 1             | 1.0     | 3.0            | 5              |         |

### 3.60 FRAGE 40: SCHÄTZUNG DER AKTUELLEN LEBENSQUALITÄT NACH KEY VARIABLEN I

| 1 = sehr gut - 5 = sehr schlecht           |                                   | 40. Wie schätzen Sie Ihre aktuelle Lebensqualität ein? |       |    |        |    |       |    |       |   |       | Total |        |
|--------------------------------------------|-----------------------------------|--------------------------------------------------------|-------|----|--------|----|-------|----|-------|---|-------|-------|--------|
|                                            |                                   | 1                                                      |       | 2  |        | 3  |       | 4  |       | 5 |       | N     | col%   |
|                                            |                                   | N                                                      | row%  | N  | row%   | N  | row%  | N  | row%  | N | row%  |       |        |
| Total                                      |                                   | 70                                                     | 34.0% | 62 | 30.1%  | 48 | 23.3% | 20 | 9.7%  | 6 | 2.9%  | 206   | 100.0% |
| Geschlecht:                                | Weiblich                          | 55                                                     | 35.9% | 49 | 32.0%  | 33 | 21.6% | 11 | 7.2%  | 5 | 3.3%  | 153   | 74.3%  |
|                                            | Männlich                          | 14                                                     | 27.5% | 12 | 23.5%  | 15 | 29.4% | 9  | 17.6% | 1 | 2.0%  | 51    | 24.8%  |
|                                            | Keine Angabe                      | 1                                                      | 50.0% | 1  | 50.0%  |    |       |    |       |   |       | 2     | 1.0%   |
|                                            |                                   |                                                        |       |    |        |    |       |    |       |   |       |       |        |
| Altersgruppe:                              | bis 30 Jahre                      | 13                                                     | 39.4% | 10 | 30.3%  | 7  | 21.2% | 2  | 6.1%  | 1 | 3.0%  | 33    | 16.0%  |
|                                            | 31 – 40 Jahre                     | 26                                                     | 48.1% | 15 | 27.8%  | 9  | 16.7% | 3  | 5.6%  | 1 | 1.9%  | 54    | 26.2%  |
|                                            | 41 – 45 Jahre                     | 8                                                      | 23.5% | 12 | 35.3%  | 9  | 26.5% | 3  | 8.8%  | 2 | 5.9%  | 34    | 16.5%  |
|                                            | über 45 Jahre                     | 22                                                     | 26.5% | 24 | 28.9%  | 23 | 27.7% | 12 | 14.5% | 2 | 2.4%  | 83    | 40.3%  |
|                                            | Keine Angabe                      | 1                                                      | 50.0% | 1  | 50.0%  |    |       |    |       |   |       | 2     | 1.0%   |
| höchste<br>Berufsausbildung:               | Obligatorische Schule/Anlehre     | 3                                                      | 18.8% | 5  | 31.3%  | 6  | 37.5% | 2  | 12.5% |   |       | 16    | 7.8%   |
|                                            | Berufslehre/ - schule             | 32                                                     | 34.4% | 26 | 28.0%  | 25 | 26.9% | 7  | 7.5%  | 3 | 3.2%  | 93    | 45.1%  |
|                                            | Höhere Fach- und Berufsausbildung | 19                                                     | 31.7% | 19 | 31.7%  | 9  | 15.0% | 10 | 16.7% | 3 | 5.0%  | 60    | 29.1%  |
|                                            | Universität / Fachhochschule      | 15                                                     | 44.1% | 11 | 32.4%  | 7  | 20.6% | 1  | 2.9%  |   |       | 34    | 16.5%  |
|                                            | Keine Angabe                      | 1                                                      | 33.3% | 1  | 33.3%  | 1  | 33.3% |    |       |   |       | 3     | 1.5%   |
| Form der MS:                               | CIS                               |                                                        |       | 4  | 80.0%  |    |       |    |       | 1 | 20.0% | 5     | 2.4%   |
|                                            | RRMS                              | 67                                                     | 36.2% | 55 | 29.7%  | 42 | 22.7% | 17 | 9.2%  | 4 | 2.2%  | 185   | 89.8%  |
|                                            | SPMS                              | 3                                                      | 21.4% | 1  | 7.1%   | 6  | 42.9% | 3  | 21.4% | 1 | 7.1%  | 14    | 6.8%   |
|                                            | Keine Angabe                      |                                                        |       | 2  | 100.0% |    |       |    |       |   |       | 2     | 1.0%   |
| Dauer seit der<br>Diagnose:                | < 12 Monate                       | 7                                                      | 38.9% | 4  | 22.2%  | 5  | 27.8% |    |       | 2 | 11.1% | 18    | 8.7%   |
|                                            | 1 – 3 Jahre                       | 16                                                     | 55.2% | 6  | 20.7%  | 4  | 13.8% | 3  | 10.3% |   |       | 29    | 14.1%  |
|                                            | 3 – 5 Jahre                       | 12                                                     | 46.2% | 7  | 26.9%  | 5  | 19.2% | 2  | 7.7%  |   |       | 26    | 12.6%  |
|                                            | 5 – 10 Jahre                      | 14                                                     | 31.8% | 16 | 36.4%  | 11 | 25.0% | 2  | 4.5%  | 1 | 2.3%  | 44    | 21.4%  |
|                                            | 10 – 15 Jahre                     | 7                                                      | 20.0% | 15 | 42.9%  | 6  | 17.1% | 7  | 20.0% |   |       | 35    | 17.0%  |
|                                            | > 15 Jahre                        | 14                                                     | 26.4% | 13 | 24.5%  | 17 | 32.1% | 6  | 11.3% | 3 | 5.7%  | 53    | 25.7%  |
|                                            | Keine Angabe                      |                                                        |       | 1  | 100.0% |    |       |    |       |   |       | 1     | 0.5%   |
| Gespräch mit<br>Neurologe bei<br>Diagnose: | sehr gut/gut                      | 50                                                     | 44.2% | 30 | 26.5%  | 23 | 20.4% | 6  | 5.3%  | 4 | 3.5%  | 113   | 54.9%  |
|                                            | mittel                            | 6                                                      | 24.0% | 8  | 32.0%  | 4  | 16.0% | 6  | 24.0% | 1 | 4.0%  | 25    | 12.1%  |
|                                            | schlecht/sehr schlecht            | 14                                                     | 22.2% | 21 | 33.3%  | 20 | 31.7% | 7  | 11.1% | 1 | 1.6%  | 63    | 30.6%  |
|                                            | Keine Angabe                      |                                                        |       | 3  | 60.0%  | 1  | 20.0% | 1  | 20.0% |   |       | 5     | 2.4%   |

### 3.61 FRAGE 40: SCHÄTZUNG DER AKTUELLEN LEBENSQUALITÄT NACH KEY VARIABLEN II

| 1 = sehr gut - 5 = sehr schlecht    |                    | 40. Wie schätzen Sie Ihre aktuelle Lebensqualität ein? |       |    |       |    |       |    |       |   |       | Total |        |
|-------------------------------------|--------------------|--------------------------------------------------------|-------|----|-------|----|-------|----|-------|---|-------|-------|--------|
|                                     |                    | 1                                                      |       | 2  |       | 3  |       | 4  |       | 5 |       | N     | col%   |
|                                     |                    | N                                                      | row%  | N  | row%  | N  | row%  | N  | row%  | N | row%  |       |        |
| Total                               |                    | 70                                                     | 34.0% | 62 | 30.1% | 48 | 23.3% | 20 | 9.7%  | 6 | 2.9%  | 206   | 100.0% |
| Zweitmeinung bei Diagnose:          | ja                 | 10                                                     | 25.6% | 11 | 28.2% | 8  | 20.5% | 7  | 17.9% | 3 | 7.7%  | 39    | 18.9%  |
|                                     | nein               | 56                                                     | 35.9% | 49 | 31.4% | 38 | 24.4% | 11 | 7.1%  | 2 | 1.3%  | 156   | 75.7%  |
|                                     | Keine Angabe       | 4                                                      | 36.4% | 2  | 18.2% | 2  | 18.2% | 2  | 18.2% | 1 | 9.1%  | 11    | 5.3%   |
| Therapieentscheid bei Erstdiagnose: | Aubagio            | 3                                                      | 75.0% | 1  | 25.0% |    |       |    |       |   |       | 4     | 1.9%   |
|                                     | Injizierbare       | 36                                                     | 24.3% | 54 | 36.5% | 37 | 25.0% | 16 | 10.8% | 5 | 3.4%  | 148   | 71.8%  |
|                                     | Gilenya            | 10                                                     | 50.0% | 5  | 25.0% | 3  | 15.0% | 2  | 10.0% |   |       | 20    | 9.7%   |
|                                     | Tecfidera          | 9                                                      | 64.3% | 1  | 7.1%  | 3  | 21.4% |    |       | 1 | 7.1%  | 14    | 6.8%   |
|                                     | Tysabri            | 4                                                      | 44.4% | 1  | 11.1% | 3  | 33.3% | 1  | 11.1% |   |       | 9     | 4.4%   |
|                                     | Andere             | 2                                                      | 50.0% |    |       | 2  | 50.0% |    |       |   |       | 4     | 1.9%   |
|                                     | Keine Angabe       | 6                                                      | 85.7% |    |       |    |       | 1  | 14.3% |   |       | 7     | 3.4%   |
| Rebif bei Erstdiagnose:             | nein               | 52                                                     | 35.1% | 41 | 27.7% | 37 | 25.0% | 15 | 10.1% | 3 | 2.0%  | 148   | 71.8%  |
|                                     | ja                 | 18                                                     | 31.0% | 21 | 36.2% | 11 | 19.0% | 5  | 8.6%  | 3 | 5.2%  | 58    | 28.2%  |
| Aktuelle Behandlung:                | Aubagio            | 6                                                      | 75.0% | 2  | 25.0% |    |       |    |       |   |       | 8     | 3.9%   |
|                                     | Injizierbare       | 7                                                      | 17.9% | 16 | 41.0% | 9  | 23.1% | 6  | 15.4% | 1 | 2.6%  | 39    | 18.9%  |
|                                     | Gilenya            | 20                                                     | 32.8% | 17 | 27.9% | 15 | 24.6% | 9  | 14.8% |   |       | 61    | 29.6%  |
|                                     | Tecfidera          | 10                                                     | 50.0% | 4  | 20.0% | 4  | 20.0% | 1  | 5.0%  | 1 | 5.0%  | 20    | 9.7%   |
|                                     | Tysabri            | 20                                                     | 36.4% | 16 | 29.1% | 16 | 29.1% | 2  | 3.6%  | 1 | 1.8%  | 55    | 26.7%  |
|                                     | Andere             | 1                                                      | 33.3% | 2  | 66.7% |    |       |    |       |   |       | 3     | 1.5%   |
|                                     | keine Therapie     | 5                                                      | 27.8% | 4  | 22.2% | 4  | 22.2% | 2  | 11.1% | 3 | 16.7% | 18    | 8.7%   |
|                                     | Keine Angabe       | 1                                                      | 50.0% | 1  | 50.0% |    |       |    |       |   |       | 2     | 1.0%   |
| Rebif ist aktuelle Behandlung:      | nein               | 68                                                     | 35.1% | 57 | 29.4% | 45 | 23.2% | 19 | 9.8%  | 5 | 2.6%  | 194   | 94.2%  |
|                                     | ja                 | 2                                                      | 16.7% | 5  | 41.7% | 3  | 25.0% | 1  | 8.3%  | 1 | 8.3%  | 12    | 5.8%   |
| Anzahl MS Langzeit-Therapien:       | Erste MS Therapie  | 25                                                     | 43.1% | 16 | 27.6% | 10 | 17.2% | 5  | 8.6%  | 2 | 3.4%  | 58    | 28.2%  |
|                                     | Zweite MS Therapie | 28                                                     | 34.1% | 26 | 31.7% | 22 | 26.8% | 6  | 7.3%  |   |       | 82    | 39.8%  |
|                                     | Dritte oder mehr   | 12                                                     | 25.5% | 15 | 31.9% | 12 | 25.5% | 7  | 14.9% | 1 | 2.1%  | 47    | 22.8%  |
|                                     | Keine Angabe       | 5                                                      | 26.3% | 5  | 26.3% | 4  | 21.1% | 2  | 10.5% | 3 | 15.8% | 19    | 9.2%   |
| Rückblickend gleiche Therapie:      | ja                 | 47                                                     | 36.7% | 35 | 27.3% | 32 | 25.0% | 11 | 8.6%  | 3 | 2.3%  | 128   | 62.1%  |
|                                     | nein               | 15                                                     | 27.8% | 17 | 31.5% | 13 | 24.1% | 7  | 13.0% | 2 | 3.7%  | 54    | 26.2%  |
|                                     | Keine Angabe       | 8                                                      | 33.3% | 10 | 41.7% | 3  | 12.5% | 2  | 8.3%  | 1 | 4.2%  | 24    | 11.7%  |

### 3.62 FRAGE 40: SCHÄTZUNG DER AKTUELLEN LEBENSQUALITÄT (KENNZAHLEN)NACH KEY VARIABLEN I

|                                            |                                   | 40. Wie schätzen Sie Ihre aktuelle Lebensqualität ein? |      |        |                  |         |                   |                   |         |
|--------------------------------------------|-----------------------------------|--------------------------------------------------------|------|--------|------------------|---------|-------------------|-------------------|---------|
|                                            |                                   | Count                                                  | Mean | Median | Std<br>Deviation | Minimum | Lower<br>quartile | Upper<br>quartile | Maximum |
| 1 = sehr gut - 5 = sehr schlecht           |                                   |                                                        |      |        |                  |         |                   |                   |         |
| Total                                      |                                   | N=206                                                  | 2.2  | 2.0    | 1.09             | 1       | 1.0               | 3.0               | 5       |
| Geschlecht:                                | Weiblich                          | N=153                                                  | 2.1  | 2.0    | 1.07             | 1       | 1.0               | 3.0               | 5       |
|                                            | Männlich                          | N=51                                                   | 2.4  | 2.0    | 1.14             | 1       | 1.0               | 3.0               | 5       |
|                                            | Keine Angabe                      | N=2                                                    | 1.5  | 1.5    | 0.71             | 1       | 1.0               |                   | 2       |
| Altersgruppe:                              | bis 30 Jahre                      | N=33                                                   | 2.0  | 2.0    | 1.07             | 1       | 1.0               | 3.0               | 5       |
|                                            | 31 – 40 Jahre                     | N=54                                                   | 1.9  | 2.0    | 1.02             | 1       | 1.0               | 2.3               | 5       |
|                                            | 41 – 45 Jahre                     | N=34                                                   | 2.4  | 2.0    | 1.13             | 1       | 1.8               | 3.0               | 5       |
|                                            | über 45 Jahre                     | N=83                                                   | 2.4  | 2.0    | 1.10             | 1       | 1.0               | 3.0               | 5       |
|                                            | Keine Angabe                      | N=2                                                    | 1.5  | 1.5    | 0.71             | 1       | 1.0               |                   | 2       |
| höchste<br>Berufsausbildung:               | Obligatorische Schule/Anlehre     | N=16                                                   | 2.4  | 2.5    | 0.96             | 1       | 2.0               | 3.0               | 4       |
|                                            | Berufslehre/ - schule             | N=93                                                   | 2.2  | 2.0    | 1.09             | 1       | 1.0               | 3.0               | 5       |
|                                            | Höhere Fach- und Berufsausbildung | N=60                                                   | 2.3  | 2.0    | 1.23             | 1       | 1.0               | 3.0               | 5       |
|                                            | Universität / Fachhochschule      | N=34                                                   | 1.8  | 2.0    | 0.87             | 1       | 1.0               | 2.3               | 4       |
|                                            | Keine Angabe                      | N=3                                                    | 2.0  | 2.0    | 1.00             | 1       | 1.0               |                   | 3       |
| Form der MS:                               | CIS                               | N=5                                                    | 2.6  | 2.0    | 1.34             | 2       | 2.0               | 3.5               | 5       |
|                                            | RRMS                              | N=185                                                  | 2.1  | 2.0    | 1.07             | 1       | 1.0               | 3.0               | 5       |
|                                            | SPMS                              | N=14                                                   | 2.9  | 3.0    | 1.23             | 1       | 1.8               | 4.0               | 5       |
|                                            | Keine Angabe                      | N=2                                                    | 2.0  | 2.0    | 0.00             | 2       | 2.0               | 2.0               | 2       |
| Dauer seit der<br>Diagnose:                | < 12 Monate                       | N=18                                                   | 2.2  | 2.0    | 1.31             | 1       | 1.0               | 3.0               | 5       |
|                                            | 1 – 3 Jahre                       | N=29                                                   | 1.8  | 1.0    | 1.05             | 1       | 1.0               | 2.5               | 4       |
|                                            | 3 – 5 Jahre                       | N=26                                                   | 1.9  | 2.0    | 0.99             | 1       | 1.0               | 3.0               | 4       |
|                                            | 5 – 10 Jahre                      | N=44                                                   | 2.1  | 2.0    | 0.98             | 1       | 1.0               | 3.0               | 5       |
|                                            | 10 – 15 Jahre                     | N=35                                                   | 2.4  | 2.0    | 1.03             | 1       | 2.0               | 3.0               | 4       |
|                                            | > 15 Jahre                        | N=53                                                   | 2.5  | 2.0    | 1.17             | 1       | 1.0               | 3.0               | 5       |
|                                            | Keine Angabe                      | N=1                                                    | 2.0  | 2.0    |                  | 2       | 2.0               | 2.0               | 2       |
| Gespräch mit<br>Neurologe bei<br>Diagnose: | sehr gut/gut                      | N=113                                                  | 2.0  | 2.0    | 1.09             | 1       | 1.0               | 3.0               | 5       |
|                                            | mittel                            | N=25                                                   | 2.5  | 2.0    | 1.23             | 1       | 1.5               | 4.0               | 5       |
|                                            | schlecht/sehr schlecht            | N=63                                                   | 2.4  | 2.0    | 1.00             | 1       | 2.0               | 3.0               | 5       |
|                                            | Keine Angabe                      | N=5                                                    | 2.6  | 2.0    | 0.89             | 2       | 2.0               | 3.5               | 4       |

### 3.63 FRAGE 40: SCHÄTZUNG DER AKTUELLEN LEBENSQUALITÄT (KENNZAHLEN)NACH KEY VARIABLEN II

|                                     |                    | 40. Wie schätzen Sie Ihre aktuelle Lebensqualität ein? |      |        |               |         |                |                |         |
|-------------------------------------|--------------------|--------------------------------------------------------|------|--------|---------------|---------|----------------|----------------|---------|
|                                     |                    | Count                                                  | Mean | Median | Std Deviation | Minimum | Lower quartile | Upper quartile | Maximum |
| 1 = sehr gut - 5 = sehr schlecht    |                    |                                                        |      |        |               |         |                |                |         |
| Total                               |                    | N=206                                                  | 2.2  | 2.0    | 1.09          | 1       | 1.0            | 3.0            | 5       |
| Zweitmeinung bei Diagnose:          | ja                 | N=39                                                   | 2.5  | 2.0    | 1.27          | 1       | 1.0            | 4.0            | 5       |
|                                     | nein               | N=156                                                  | 2.1  | 2.0    | 1.00          | 1       | 1.0            | 3.0            | 5       |
|                                     | Keine Angabe       | N=11                                                   | 2.5  | 2.0    | 1.44          | 1       | 1.0            | 4.0            | 5       |
|                                     |                    |                                                        |      |        |               |         |                |                |         |
| Therapieentscheid bei Erstdiagnose: | Aubagio            | N=4                                                    | 1.3  | 1.0    | 0.50          | 1       | 1.0            | 1.8            | 2       |
|                                     | Injizierbare       | N=148                                                  | 2.3  | 2.0    | 1.06          | 1       | 2.0            | 3.0            | 5       |
|                                     | Gilenya            | N=20                                                   | 1.9  | 1.5    | 1.04          | 1       | 1.0            | 2.8            | 4       |
|                                     | Tecfidera          | N=14                                                   | 1.8  | 1.0    | 1.25          | 1       | 1.0            | 3.0            | 5       |
|                                     | Tysabri            | N=9                                                    | 2.1  | 2.0    | 1.17          | 1       | 1.0            | 3.0            | 4       |
|                                     | Andere             | N=4                                                    | 2.0  | 2.0    | 1.15          | 1       | 1.0            | 3.0            | 3       |
|                                     | Keine Angabe       | N=7                                                    | 1.4  | 1.0    | 1.13          | 1       | 1.0            | 1.0            | 4       |
|                                     |                    |                                                        |      |        |               |         |                |                |         |
| Rebif bei Erstdiagnose:             | nein               | N=148                                                  | 2.2  | 2.0    | 1.08          | 1       | 1.0            | 3.0            | 5       |
|                                     | ja                 | N=58                                                   | 2.2  | 2.0    | 1.14          | 1       | 1.0            | 3.0            | 5       |
| Aktuelle Behandlung:                | Aubagio            | N=8                                                    | 1.3  | 1.0    | 0.46          | 1       | 1.0            | 1.8            | 2       |
|                                     | Injizierbare       | N=39                                                   | 2.4  | 2.0    | 1.05          | 1       | 2.0            | 3.0            | 5       |
|                                     | Gilenya            | N=61                                                   | 2.2  | 2.0    | 1.07          | 1       | 1.0            | 3.0            | 4       |
|                                     | Tecfidera          | N=20                                                   | 2.0  | 1.5    | 1.19          | 1       | 1.0            | 3.0            | 5       |
|                                     | Tysabri            | N=55                                                   | 2.1  | 2.0    | 0.99          | 1       | 1.0            | 3.0            | 5       |
|                                     | Andere             | N=3                                                    | 1.7  | 2.0    | 0.58          | 1       | 1.0            |                | 2       |
|                                     | keine Therapie     | N=18                                                   | 2.7  | 2.5    | 1.46          | 1       | 1.0            | 4.0            | 5       |
|                                     | Keine Angabe       | N=2                                                    | 1.5  | 1.5    | 0.71          | 1       | 1.0            |                | 2       |
|                                     |                    |                                                        |      |        |               |         |                |                |         |
| Rebif ist aktuelle Behandlung:      | nein               | N=194                                                  | 2.2  | 2.0    | 1.09          | 1       | 1.0            | 3.0            | 5       |
|                                     | ja                 | N=12                                                   | 2.5  | 2.0    | 1.17          | 1       | 2.0            | 3.0            | 5       |
| Anzahl MS Langzeit-Therapien:       | Erste MS Therapie  | N=58                                                   | 2.0  | 2.0    | 1.13          | 1       | 1.0            | 3.0            | 5       |
|                                     | Zweite MS Therapie | N=82                                                   | 2.1  | 2.0    | 0.95          | 1       | 1.0            | 3.0            | 4       |
|                                     | Dritte oder mehr   | N=47                                                   | 2.4  | 2.0    | 1.09          | 1       | 1.0            | 3.0            | 5       |
|                                     | Keine Angabe       | N=19                                                   | 2.6  | 2.0    | 1.42          | 1       | 1.0            | 4.0            | 5       |
| Rückblickend gleiche Therapie:      | ja                 | N=128                                                  | 2.1  | 2.0    | 1.08          | 1       | 1.0            | 3.0            | 5       |
|                                     | nein               | N=54                                                   | 2.3  | 2.0    | 1.13          | 1       | 1.0            | 3.0            | 5       |
|                                     | Keine Angabe       | N=24                                                   | 2.1  | 2.0    | 1.10          | 1       | 1.0            | 2.8            | 5       |

### 3.64 LISTING KOMMENTARE AUF (PAPER-FRAGEBOGEN)

|    | Case ID | Kommentar zu Papier-Fragebogen (data capture):                                                                                                                                                                                                               |
|----|---------|--------------------------------------------------------------------------------------------------------------------------------------------------------------------------------------------------------------------------------------------------------------|
| 1  | 03-031  | Q23 - Second medication - Copaxone Q36 - '1 Jahr Pause ohne Wissen der Artztes'                                                                                                                                                                              |
| 2  | 05-004  | Q7 - auch in einer privaten Praxis Q10 - Other - mabthera                                                                                                                                                                                                    |
| 3  | 05-028  | Q15 - 'Gespräch war sehr positive, hat mir Mut gemacht.'                                                                                                                                                                                                     |
| 4  | 05-050  | Q9 - 'neue wo bis 5 Jahre schubfrei ist' Q16 - 'kam nur mit 1 Idee (Gylenia)' Q23 - 'Ich konnte nicht endscheiden'                                                                                                                                           |
| 5  | 05-085  | Q10 - 'neu - Tecfidera' Q38 - "Spritzenmüdigkeit' deshalb wechsel auf Tecfidera'                                                                                                                                                                             |
| 6  | 09-091  | Q15,16 - '2011 - 5, 2016 - 2' Q17 - '2011-2016' Q23 - '2011-keine, 2016 - Tecfidera - sehr schlimme NW + Schub, nach 12 Tage' am Ende - 'Kann bloss nicht arbeiten, geniesse jeden Tag mit meinen 3 Kindern.'                                                |
| 7  | 10-011  | Q17 - 'es wurden mir 4 Blätter verschiedene Medikamente um lessen gegeben und ich musste SELBST entscheiden!!' Q29 - 'nach wechsel von Spital zu Neurologin' Q32 - '9 Jahre'                                                                                 |
| 8  | 10-013  | Q15 - 'beim damaligen Neuro bleib ich nicht' Q17 - 'der damalige' Q19 - 'beim neuen Neuro' Q37 - 'heute gibt es wirksamereTherapien'                                                                                                                         |
| 9  | 10-020  | Q38 - 'Starte gerade jetzt'                                                                                                                                                                                                                                  |
| 10 | 10-021  | Q9 - 'Rebif seit 1999, Tecfidera nur kurz Zeit' Q13 - 'nicht meine jetzige Neurologin' Q14 - 'seiner Zeit in der Privaten Praxis schlecht' Q15 - 'meine jetzige Neurologin sehr gut' Q37 - 'aber es gab noch nicht so viele Möglichkeiten' Q40 - 'ha [...]   |
| 11 | 12-011  | Q6 - "46 Jahre"                                                                                                                                                                                                                                              |
| 12 | 12-016  | Q17 - 'Habe nach einer 2. Diagnose gefragt in der MS Station in Bern (Inselspital/Neurochirurgie). Wurde sehr gut beraten und betreut. Q18 - 'versch. Möglichkeiten aufgezeigt' Q23 - Rebif - 'kamm etwas später'                                            |
| 13 | 12-033  | Q24 - Andere: "Haltbarkeit ausserhalb Kühlschranks (Reisetauglichkeit)"                                                                                                                                                                                      |
| 14 | 14-002  | Q26 - 'Betaferon' Q27 - 'Tysabri' Q28 - 'mir wurde NICHT gesagt dass Tysabri nicht als langzeit Therapie gedacht ist :( !' Q38 - 'Grundsätzlich sehr. Es geht mir sehr gut mit Tysabri. Aber die Ärzte sind unsicher, das hilft mir nicht gerade :( !' [...] |
| 15 | 14-007  | Q6 - '17 Jahre, 2000' Q9 - 'Betaferon: (mist)' Q10 - 'Tysabri: gut' Q11 - '8 Jahre' Q21 - 0-4 Wohen: 'nur Betaferon', 'Tysabri 8 Jahre'                                                                                                                      |
| 16 | 14-008  | Q9 - Avonex - 'Anfangs', Tysabri - 'Jetzt' Q21 - 'Mehrere Jahre. Es wurde ein fehl-Diagnose gestalt. Hirnschlag statt MS.'                                                                                                                                   |
| 17 | 14-010  | Q24 - 'Meinung des Hausarztes'                                                                                                                                                                                                                               |
| 18 | 14-012  | Q25 - 'nur zum Spitzen Begleitung, 2-3x' Q34 - '(beim Schub)' Q39 - '1 - Jetzt, 4 - früher (anderer Arzt)'                                                                                                                                                   |
| 19 | 14-076  | Q15 - 'puis j'ai change de neurologue, pas de fusion avec le 1er. Mais tres bon prof. tout de meme.' Q16 - '2eme neurologue'                                                                                                                                 |
| 20 | 14-086  | Q13 - 'Autre Neuro' Q14 - 'Autre Neuro apres Dr. Donati' Q23 - Betaferon: 'pas fonctionner', Tysabri: 'super' Q26 - Fatigue: 5 'pendant traitment, apres ok' PS: '1er Diagnostique avec Dr. Noro, Lemann a Bienne. Je l'ai trouver incompetent sans sa [...] |
| 21 | 14-088  | Q26 - '(pas eu le choix)                                                                                                                                                                                                                                     |
| 22 | 15-003  | Q10 - 'von Anfang an mit Gilenya behandelt'                                                                                                                                                                                                                  |
| 23 | 15-005  | Q7 - In einem privaten Praxis - 'seit 2017', In einem Spital - 'bis 2017'                                                                                                                                                                                    |
| 24 | 15-017  | Q16 - 'gab keine Optionen' Q17 - 'gab keine Auswahl ausser Betainlerferon' Q25 - 'Beginn Inselspital Neurologie-abteilung' Q26 - 'Hatte damals noch keine Auswahl.'                                                                                          |
| 25 | 15-026  | Q33 - 'weitere schübe'                                                                                                                                                                                                                                       |
| 26 | 16-004  | Q30 - '7 Jahre später'                                                                                                                                                                                                                                       |
| 27 | 23-011  | Q23 - 'Ras d'autre choix selon le Neuro' Q33 - 'dereglement de la tyroide + problem au foi lie au rebif' Q34 - 'J'ai change de Neutro quand j'ai decide d'arreter le traitement'                                                                             |

### 3.64 LISTING KOMMENTARE AUF (PAPER-FRAGEBOGEN)

|       | Case ID | Kommentar zu Papier-Fragebogen (data capture):                                                                                                                                                                                                              |
|-------|---------|-------------------------------------------------------------------------------------------------------------------------------------------------------------------------------------------------------------------------------------------------------------|
| 28    | 23-024  | Q10 - 'je vois faire un traitement fin septembre' Q15 - 'ancien neurologue' Q18 - 'Il n'y avait que le Rebif' Q26 - 'effets idesirables m'ont fait renonces au traitement Rebif' Q29 - 'ancien' Q32 - '(arret de traitement pendant 12 ans apres)' [...]    |
| 29    | 24-010  | Q3 - 'actuellement' Q13 - 'Diagnostiquepar erreur une infection a la paupier au lieu d'une nevrite optique...' Q18 - 'car desire de grossesse' Q26 - 'je suis coeliaque' Q29 - Neuro: 'Dr. Di Virgilio', Acc: 'Mediservice' Q35 - 'j'ai moi meme cree [...] |
| 30    | 24-011  | Q10 - 'Zinbryla (changement prevu en septembre pour Copaxone) Q23 - 'Zinbryla' Q39 - 'pas la meme chose'                                                                                                                                                    |
| 31    | 24-022  | Q6 - '1998'                                                                                                                                                                                                                                                 |
| 32    | 25-001  | Q9 - 'Vitamine D'                                                                                                                                                                                                                                           |
| Total | N 32    | 32                                                                                                                                                                                                                                                          |

Qx = Frage x, 'Text' = verbatim, [...] = unleserlich
