# Supplementary material for: From Diagnosis to Satisfaction in Multiple Sclerosis: A Swiss Patient Survey Highlighting the Importance of the First Diagnostic Consultation
Source: MDPI journal article supplement (doi:10.3390/ctn6010004), 2022-01-31
Supplement: s1 [file s1 › MRK04_Fragebogen_D_V1.4_Final_20170323.pdf]

# Multiple Sklerose und der Therapieentscheid – Ein Fragebogen für MS-Betroffene

Multiple Sklerose (MS) ist eine chronische Erkrankung des Zentralen Nervensystems, die in der Regel im Alter von 20 - 40 Jahren diagnostiziert wird. Nach wie vor ist MS nicht heilbar, jedoch dank verschiedener verfügbarer Langzeittherapien gut behandelbar.

Die verfügbaren MS-Therapien ermöglichen die MS eines jeden Patienten individuell zu behandeln. Allerdings hat die Therapieentscheidung durch neue therapeutische Optionen an Komplexität gewonnen.

Mit diesem anonymen Fragebogen soll in Zusammenarbeit mit dem Luzerner Kantonsspital unter der Leitung von Herrn PD Dr. med. Christian Kamm und Merck Biopharma untersucht werden, wie aufgeklärt sich MS-Patienten bei der Therapieentscheidung fühlten, welche Faktoren ihren Therapieentscheid beeinflussten und was sie sich zum Zeitpunkt der Therapieentscheidung evtl. zusätzlich an Informationen gewünscht hätten.

Die Umfrage soll somit helfen, das Bedürfnis der Patienten beim Therapieentscheid in der Schweiz noch besser zu verstehen und die Aufklärung über die verschiedenen Therapien optimal zu gestalten.

Sie haben zwei Möglichkeiten, an der Umfrage teilzunehmen: Sie können den Fragebogen entweder auf Papier oder online ausfüllen. In beiden Fällen werden die Daten absolut anonymisiert erhoben. Die Auswertung der Daten erfolgt gemeinsam mit der Agentur Appletree CI Group AG aus Winterthur.

## **Ausfüllen des Fragebogens auf Papier:**

Bitte senden Sie den ausgefüllten Fragebogen mit dem beiliegenden Rückantwortkuvert an:

*Appletree CI Group AG  
Rudolf-Diesel-Strasse 3  
8404 Winterthur*

Bitte notieren Sie dabei auf dem Rückantwortkuvert nicht Ihre Absenderadresse.

## **Ausfüllen des Fragebogens online:**

Bitte gehen Sie hierfür auf [www.ms-therapy-survey.ch](http://www.ms-therapy-survey.ch) und geben Sie Ihren Zugangscode ein. Sie finden Ihren Zugangscode in der Kopfzeile dieses Schreibens.

# Hinweise zum Fragebogen

Dieser Fragebogen besteht aus 40 Fragen, die in folgende 2 Themenblöcke unterteilt sind:

- |     |                              |                |
|-----|------------------------------|----------------|
| I:  | Allgemeine Fragen            | (Fragen 1-12)  |
| II: | Fragen zum Therapieentscheid | (Fragen 13-40) |

Ihr Neurologe/Ihre Neurologin hat Ihnen den Fragebogen in einem Umschlag überreicht. Auf dem Umschlag ist Frage Nr. 5 des Fragebogens „Welche Form der MS haben Sie?“ aufgedruckt. Ihr Neurologe/Ihre Neurologin hat diese Frage bereits für Sie beantwortet. Bitte übernehmen Sie die Antwort Ihres Neurologen/Ihrer Neurologin beim Ausfüllen des Fragebogens.

# Themenblock I: Allgemeine Fragen

**Frage 1: Sind Sie weiblich oder männlich?**

- ☐ Weiblich  
☐ Männlich  
☐ Keine Angabe

**Frage 2: Zu welcher Altersgruppe gehören Sie?**

- ☐ unter 20 Jahre alt  
☐ 20 – 30 Jahre alt  
☐ 31 – 40 Jahre alt  
☐ 41 – 45 Jahre alt  
☐ über 45 Jahre alt  
☐ Keine Angabe

**Frage 3: Welches ist Ihre höchste Berufsausbildung?**

- ☐ weniger als 7 Jahre Schule  
☐ Obligatorische Schule  
☐ Anlehre  
☐ Berufslehre/ - schule  
☐ Maturitätsschule / Berufsmaturität / Diplommittelschule  
☐ Höhere Fach- und Berufsausbildung  
☐ Universität / Fachhochschule  
☐ Unbekannt  
☐ Keine Angabe

**Frage 4: Wie schätzen Sie Ihr eigenes Sicherheitsbedürfnis ein?**

(1: Ich bin sehr sicherheitsbedacht – 5: Ich bin sehr risikofreudig)

|  |                    |                          |                          |                          |                          |                          |               |  |                          |
|--|--------------------|--------------------------|--------------------------|--------------------------|--------------------------|--------------------------|---------------|--|--------------------------|
|  | sehr               |                          |                          |                          |                          |                          | sehr          |  |                          |
|  | sicherheitsbedacht | 1                        | 2                        | 3                        | 4                        | 5                        | risikofreudig |  | Keine                    |
|  |                    | <input type="checkbox"/> |               |  | Angabe                   |
|  |                    |                          |                          |                          |                          |                          |               |  | <input type="checkbox"/> |

**Frage 5: Welche Form der MS haben Sie?**

(Die Antwort zu dieser Frage hat Ihr Neurologe/Ihre Neurologin auf dem Umschlag der Umfrage angegeben. Bitte übernehmen Sie diese Antwort)

- ☐ CIS (klinisch isoliertes Syndrom)  
☐ RRMS (schubförmig remittierende MS)  
☐ SPMS (sekundär progrediente MS)  
☐ Keine Angabe

**Frage 6: Wie lange liegt ihre Diagnose zurück?**

- ☐ ≤ 6 Monate  
☐ > 6 – 12 Monate  
☐ > 1 – 3 Jahre  
☐ > 3 – 5 Jahre  
☐ > 5 – 10 Jahre  
☐ > 10 – 15 Jahre  
☐ > 15 Jahre  
☐ Keine Angabe

**Frage 7: Wo befinden Sie sich aktuell in neurologischer Behandlung?**

- ☐ In einer privaten Praxis (auch Gruppenpraxis)
- ☐ In einem Spital
- ☐ Keine Angabe

**Frage 8: Welchen Stellenwert haben folgende Punkte für Sie im Rahmen der Krankheit? (1: niedriger Stellenwert – 5: sehr hoher Stellenwert)**

|                                      | niedriger<br>Stellenwert | 1                        | 2                        | 3                        | 4                        | 5                        | sehr hoher<br>Stellenwert | Keine<br>Angabe          |
|--------------------------------------|--------------------------|--------------------------|--------------------------|--------------------------|--------------------------|--------------------------|---------------------------|--------------------------|
| Schubfreiheit:                       |                          | <input type="checkbox"/> |                           | <input type="checkbox"/> |
| Verzögerung der Behinderungszunahme: |                          | <input type="checkbox"/> |                           | <input type="checkbox"/> |
| Kinder/Familienplanung:              |                          | <input type="checkbox"/> |                           | <input type="checkbox"/> |
| Arbeit:                              |                          | <input type="checkbox"/> |                           | <input type="checkbox"/> |
| Partnerschaft:                       |                          | <input type="checkbox"/> |                           | <input type="checkbox"/> |
| Unabhängigkeit:                      |                          | <input type="checkbox"/> |                           | <input type="checkbox"/> |
| Soziales Umfeld/Beziehungen:         |                          | <input type="checkbox"/> |                           | <input type="checkbox"/> |

**Frage 9: Welche MS-Langzeittherapeutika kennen Sie?**  
(Bitte alle Therapien, die Sie kennen ankreuzen)

- ☐ Aubagio
- ☐ Avonex
- ☐ Betaferon
- ☐ Copaxone
- ☐ Gilenya
- ☐ Lemtrada
- ☐ Plegridy
- ☐ Rebif
- ☐ Tecfidera
- ☐ Tysabri
- ☐ Andere
- ☐ Keine Angabe

**Frage 10: Mit welcher MS-Langzeittherapie werden Sie aktuell behandelt?**

- ☐ Aubagio
- ☐ Avonex
- ☐ Betaferon
- ☐ Copaxone
- ☐ Gilenya
- ☐ Lemtrada
- ☐ Plegridy
- ☐ Rebif
- ☐ Tecfidera
- ☐ Tysabri
- ☐ Andere
- ☐ Ich wende gerade keine Therapie an (bitte weiter mit Frage 13)
- ☐ Keine Angabe

**Frage 11: Wie lange werden Sie mit Ihrer aktuellen Therapie bereits behandelt?**

- ☐ ≤ 6 Monate
- ☐ > 6 – 12 Monate
- ☐ > 1 – 3 Jahre
- ☐ > 3 – 5 Jahre
- ☐ > 5 – 10 Jahre
- ☐ > 10 – 15 Jahre
- ☐ > 15 Jahre
- ☐ Keine Angabe

**Frage 12: Um die wievielte MS Langzeit-Therapie handelt es sich bei Ihrer aktuellen Therapie?**

- ☐ Erste MS Therapie
- ☐ Zweite MS Therapie
- ☐ Dritte MS Therapie
- ☐ Mehr als dritte MS Therapie
- ☐ Keine Angabe

## Themenblock II: Fragen zum Therapieentscheid

**Frage 13: Wo wurde Ihre Erst-Diagnose gestellt?**

- ☐ In einer privaten Praxis (auch Gruppenpraxis)
- ☐ In einem Spital
- ☐ Keine Angabe

**Frage 14: Wie fanden Diagnosestellung und Therapieentscheid statt?**

- ☐ In einem Gespräch
- ☐ In mehreren Gesprächen (mehrere zeitlich getrennte Termine)
- ☐ Keine Angabe

**Frage 15: Wie beurteilen Sie rückblickend das Gespräch mit Ihrem Neurologen, der Ihnen die Diagnose erklärt hat? (1: sehr gut – 5: sehr schlecht)**

- |          |                          |                          |                          |                          |                          |               |                          |
|----------|--------------------------|--------------------------|--------------------------|--------------------------|--------------------------|---------------|--------------------------|
| sehr gut | 1                        | 2                        | 3                        | 4                        | 5                        | sehr schlecht | Keine Angabe             |
|          | <input type="checkbox"/> |               | <input type="checkbox"/> |

**Frage 16: Sie wurden nach Ihrer Diagnose auf die verschiedenen Optionen einer MS-Langzeittherapie hingewiesen. Wie gut fühlten Sie sich über die (evtl. damals vorhandenen) verschiedenen Therapieoptionen rückblickend informiert? (1: sehr gut – 5: sehr schlecht)**

- |          |                          |                          |                          |                          |                          |               |                          |
|----------|--------------------------|--------------------------|--------------------------|--------------------------|--------------------------|---------------|--------------------------|
| sehr gut | 1                        | 2                        | 3                        | 4                        | 5                        | sehr schlecht | Keine Angabe             |
|          | <input type="checkbox"/> |               | <input type="checkbox"/> |

**Frage 17: Hat Ihnen Ihr Neurologe nach Ihrer Diagnose Ihrer Meinung nach alle (damals möglichen) Therapien vorgestellt?**

- ☐ Ja
- ☐ Nein
- ☐ Weiss ich nicht mehr
- ☐ Keine Angabe

**Frage 18: Hat Ihnen Ihr Neurologe zu einer bestimmten Therapie geraten?**

- ☐ Ja
- ☐ Nein
- ☐ Weiss ich nicht mehr
- ☐ Keine Angabe

**Frage 19: Wo haben Sie sich bzgl. der therapeutischen Möglichkeiten der verschiedenen MS-Langzeittherapien Informationen eingeholt?**  
(Mehrfachnennungen möglich)

- ☐ Behandelnde Neurologin / behandelnder Neurologe
- ☐ Hausarzt
- ☐ MS-Pflegefachperson
- ☐ Frauenarzt / Frauenärztin
- ☐ Internet
- ☐ Fortbildungsseminare
- ☐ Austausch mit anderen MS-Betroffenen
- ☐ Bekannte / Freunde
- ☐ Ich habe mir zu diesem Thema keine Informationen eingeholt
- ☐ Keine Angabe

**Frage 20: Welche Rolle hatte Ihre Therapiebegleitung (z.B. MS Nurse/ MS Pflegefachperson) beim Therapieentscheid?** (1: keine Rolle – 5: sehr wichtige Rolle oder „keine Therapiebegleitung“)

|       |                          |                          |                          |                          |                          |                |                          |  |  |  |                          |  |
|-------|--------------------------|--------------------------|--------------------------|--------------------------|--------------------------|----------------|--------------------------|--|--|--|--------------------------|--|
| keine |                          |                          |                          |                          |                          | sehr           |                          |  |  |  |                          |  |
| Rolle | 1                        | 2                        | 3                        | 4                        | 5                        | wichtige Rolle | Keine                    |  |  |  | Keine                    |  |
|       |                          |                          |                          |                          |                          |                | Therapiebegleitung       |  |  |  | Angabe                   |  |
|       | <input type="checkbox"/> |                | <input type="checkbox"/> |  |  |  | <input type="checkbox"/> |  |

**Frage 21: Wie lange dauerte es von der Diagnosestellung bis zum Therapiestart?**

- ☐ 0 – 4 Wochen (bitte weiter mit Frage mit 23)
- ☐ > 1 – 3 Monate (bitte weiter mit Frage mit 23)
- ☐ > 3 – 6 Monate (bitte weiter mit Frage mit 23)
- ☐ > 6 – 12 Monate (bitte weiter mit Frage mit 23)
- ☐ > 12 Monate (bitte weiter mit Frage mit 23)
- ☐ Keine Therapie erwünscht (bitte weiter mit Frage 22)
- ☐ Keine Angabe (bitte weiter mit Frage mit 23)

**Frage 22: Warum haben Sie sich gegen eine MS Langzeittherapie entschieden?**  
(Mehrfachnennungen möglich)

- ☐ Nebenwirkungen
- ☐ Anwendung
- ☐ Mangelndes Vertrauen in die Wirksamkeit
- ☐ Negative Nutzen/Risiko Bewertung
- ☐ Abraten durch soziales Umfeld
- ☐ Kinderwunsch
- ☐ Kosten
- ☐ Mangelndes Vertrauen zum Arzt
- ☐ Entscheid für alternative Therapieverfahren
- ☐ Andere Kriterien
- ☐ Keine Angabe

Falls Sie bei Frage 21 „keine Therapie“ angekreuzt haben, bitte mit Frage 39 weiter.

**Frage 23: Für welche MS-Langzeittherapie haben Sie sich nach Ihrer Erst-Diagnose entschieden?**

- ☐ Aubagio
- ☐ Avonex
- ☐ Betaferon
- ☐ Copaxone
- ☐ Gilenya
- ☐ Lemtrada
- ☐ Plegridy
- ☐ Rebif
- ☐ Tecfidera
- ☐ Tysabri
- ☐ Andere
- ☐ Keine Angabe

**Frage 24: Welche Faktoren haben Sie dazu bewogen, diese Therapie anzuwenden?**

|                                             | niedriger<br>Stellenwert | 1                        | 2                        | 3                        | 4                        | 5                        | sehr hoher<br>Stellenwert | Keine<br>Angabe          |
|---------------------------------------------|--------------------------|--------------------------|--------------------------|--------------------------|--------------------------|--------------------------|---------------------------|--------------------------|
| Schubfreiheit:                              |                          | <input type="checkbox"/> |                           | <input type="checkbox"/> |
| Verzögerung der Behinderungszunahme:        |                          | <input type="checkbox"/> |                           | <input type="checkbox"/> |
| Wirksamkeit:                                |                          | <input type="checkbox"/> |                           | <input type="checkbox"/> |
| Kinder/Familienplanung:                     |                          | <input type="checkbox"/> |                           | <input type="checkbox"/> |
| Arbeit:                                     |                          | <input type="checkbox"/> |                           | <input type="checkbox"/> |
| Partnerschaft:                              |                          | <input type="checkbox"/> |                           | <input type="checkbox"/> |
| Unabhängigkeit:                             |                          | <input type="checkbox"/> |                           | <input type="checkbox"/> |
| Das Langzeitsicherheitsprofil der Therapie: |                          | <input type="checkbox"/> |                           | <input type="checkbox"/> |
| Die Art der Anwendung:                      |                          | <input type="checkbox"/> |                           | <input type="checkbox"/> |
| Die Häufigkeit der Therapieanwendung:       |                          | <input type="checkbox"/> |                           | <input type="checkbox"/> |
| Dokumentierte Langzeitdaten:                |                          | <input type="checkbox"/> |                           | <input type="checkbox"/> |
| Verträglichkeit:                            |                          | <input type="checkbox"/> |                           | <input type="checkbox"/> |
| Andere:                                     |                          | <input type="checkbox"/> |                           | <input type="checkbox"/> |

**Frage 25: Welche Rolle hatte Ihre Therapiebegleitung (z.B. MS Nurse/ MS Pflegefachperson) beim Therapiestart? (1: keine Rolle – 5: sehr wichtige Rolle oder „keine Therapiebegleitung“)**

| keine<br>Rolle | 1                        | 2                        | 3                        | 4                        | 5                        | sehr<br>wichtige Rolle | Keine<br>Therapiebegleitung | Keine<br>Angabe          |
|----------------|--------------------------|--------------------------|--------------------------|--------------------------|--------------------------|------------------------|-----------------------------|--------------------------|
|                | <input type="checkbox"/> |                        | <input type="checkbox"/>    | <input type="checkbox"/> |

**Frage 26: Wie stark haben mögliche Nebenwirkungen bei MS Therapeutika ihre Wahl für ein Präparat beeinflusst? (1: gar nicht – 5: sehr stark)**

|                                                           | gar<br>nicht             | 1                        | 2                        | 3                        | 4                        | 5                        | sehr<br>stark            | Keine<br>Angabe          |
|-----------------------------------------------------------|--------------------------|--------------------------|--------------------------|--------------------------|--------------------------|--------------------------|--------------------------|--------------------------|
| Herzrhythmusstörungen:                                    | <input type="checkbox"/> |
| Makulaödem (Schwellung der Netzhaut im Augenhintergrund): | <input type="checkbox"/> |
| Reaktion der Einstichstelle bei Injektionen:              | <input type="checkbox"/> |
| Dünnere werdende Haare:                                   | <input type="checkbox"/> |
| Infektionen:                                              | <input type="checkbox"/> |
| Progressive multifokale Leukenzephalopathie (PML):        | <input type="checkbox"/> |
| Übelkeit / Erbrechen:                                     | <input type="checkbox"/> |
| Hautauschlag/Hautrötungen:                                | <input type="checkbox"/> |
| Lymphopenie:                                              | <input type="checkbox"/> |
| Müdigkeit:                                                | <input type="checkbox"/> |
| Grippe-ähnliche-Symptome:                                 | <input type="checkbox"/> |
| Krebsrisiko:                                              | <input type="checkbox"/> |
| Verdauungsprobleme:                                       | <input type="checkbox"/> |
| Datenlage bei Schwangerschaft:                            | <input type="checkbox"/> |

**Frage 27: Wie sicher haben Sie sich gefühlt bei der Entscheidung für Ihre Therapie? (1: sehr sicher – 5: sehr unsicher)**

| sehr<br>sicher           | 1                        | 2                        | 3                        | 4                        | 5                        | sehr<br>unsicher         | Keine<br>Angabe          |
|--------------------------|--------------------------|--------------------------|--------------------------|--------------------------|--------------------------|--------------------------|--------------------------|
| <input type="checkbox"/> |

**Frage 28: Was hätte Ihnen beim Therapieentscheid zusätzlich geholfen? (Mehrfachnennungen möglich)**

- ☐ Mehr Zeit mit meinem behandelnden Neurologen
- ☐ Mehr Zeit mit meiner Therapiebegleitung (MS Schwester/ MS Pflegefachperson)
- ☐ Mehr Informationen zu Nebenwirkungen und dem Sicherheitsprofil der einzelnen Therapien
- ☐ Ein verstärkter Austausch mit anderen Betroffenen
- ☐ Psychologische Beratung
- ☐ Keine Angabe

**Frage 29: Wie fühlten Sie sich beim und nach dem Therapiestart durch folgende Fachpersonen betreut? (1: schlecht – 5: gut)**

|                                                      | sehr<br>schlecht         | 1                        | 2                        | 3                        | 4                        | 5                        | sehr<br>gut              | Keine<br>Angabe          |
|------------------------------------------------------|--------------------------|--------------------------|--------------------------|--------------------------|--------------------------|--------------------------|--------------------------|--------------------------|
| Behandelnde(r) Neurologe/in:                         | <input type="checkbox"/> |
| Therapiebegleitung (z.B. MS Nurse/Pflegefachperson)* | <input type="checkbox"/> |

\*Falls keine Therapiebegleitung vorhanden war, bitte nicht beantworten.

**Frage 30: Haben Sie sich nach/bei Ihrer Erst-Diagnose eine Zweitmeinung eingeholt?**

- ☐ Ja  
☐ Nein (bitte weiter mit Frage 32)  
☐ Keine Angabe (bitte weiter mit Frage 32)

**Frage 31: Sie haben Sich bei Ihrer Erst-Diagnose eine Zweitmeinung eingeholt. Wie hilfreich war dies für Sie rückblickend?**

(1: sehr hilfreich – 5: überhaupt nicht hilfreich)

| sehr<br>hilfreich | 1                        | 2                        | 3                        | 4                        | 5                        | überhaupt<br>nicht hilfreich | Keine<br>Angabe          |
|-------------------|--------------------------|--------------------------|--------------------------|--------------------------|--------------------------|------------------------------|--------------------------|
|                   | <input type="checkbox"/> |                              | <input type="checkbox"/> |

**Frage 32: Wie lange war die Dauer der Ersttherapie nach Diagnosestellung bis zu einem Wechsel auf ein anderes Präparat?**

- ☐ Immer noch auf Erst-Therapie (bitte weiter mit Frage 34)  
☐ 1 – 6 Monate  
☐ > 6 – 12 Monate  
☐ > 1 – 3 Jahre  
☐ > 3 – 5 Jahre  
☐ > 5 Jahre  
☐ Keine Angabe

**Frage 33: Was waren die Gründe für einen Wechsel der Ersttherapie?**

(Mehrfachnennungen möglich)

- ☐ Wirksamkeit  
☐ Verträglichkeit / Nebenwirkungen  
☐ Art der Anwendung  
☐ Kinder/Familienplanung  
☐ Anderes  
☐ Keine Angabe

**Frage 34: Wie oft sehen sie Ihren behandelnden Neurologen?**

- ☐ Weniger als 1 mal pro Jahr  
☐ 1 mal pro Jahr  
☐ 2 mal pro Jahr  
☐ Mehr als 2 mal pro Jahr  
☐ Keine Angabe

**Frage 35: Wie stark tragen Ihrer Meinung nach folgende Faktoren zur Therapietreue (Adhärenz) bei? (1: kein Beitrag – 5: starker Beitrag)**

|                                                   | kein<br>Beitrag          | 1                        | 2                        | 3                        | 4                        | 5                        | starker<br>Beitrag       | Keine<br>Angabe          |
|---------------------------------------------------|--------------------------|--------------------------|--------------------------|--------------------------|--------------------------|--------------------------|--------------------------|--------------------------|
| Behandelnder Neurologe/ Behandelnde Neurologin    | <input type="checkbox"/> |
| Therapiebegleitung (MS Nurse/MS Pflegefachperson) | <input type="checkbox"/> |
| Familie / Freunde                                 | <input type="checkbox"/> |
| Wirksamkeit der Medikation (keine MS Symptome)    | <input type="checkbox"/> |
| Eigenmotivation                                   | <input type="checkbox"/> |
| Fortbildungsseminare                              | <input type="checkbox"/> |
| Internet-Foren                                    | <input type="checkbox"/> |

**Frage 36: Wie lange waren Sie seit der Diagnosestellung ungefähr mit MS-Langzeittherapie behandelt?**

- ☐ Ich war immer unter Behandlung (>75-100% der Zeit seit Diagnosestellung)
- ☐ Ich war meistens unter Behandlung (>50-75% der Zeit seit Diagnosestellung)
- ☐ Ich war öfters unter Behandlung (>25-50% der Zeit seit Diagnosestellung)
- ☐ Ich war selten unter Behandlung (1-25% der Zeit seit Diagnosestellung)
- ☐ Ich war nie in Behandlung
- ☐ Keine Angabe

**Frage 37: Würden Sie sich rückblickend für die gleiche MS-Langzeittherapie nach Ihrer Erst-Diagnose entscheiden?**

- ☐ Ja
- ☐ Nein
- ☐ Keine Angabe

**Frage 38: Wie sehr sind Sie mit der momentanen Therapiewahl zufrieden?**  
(1: sehr zufrieden – 5: überhaupt nicht zufrieden)

|                   |                          |                          |                          |                          |                          |                              |                          |
|-------------------|--------------------------|--------------------------|--------------------------|--------------------------|--------------------------|------------------------------|--------------------------|
| sehr<br>zufrieden | 1                        | 2                        | 3                        | 4                        | 5                        | überhaupt<br>nicht zufrieden | Keine<br>Angabe          |
|                   | <input type="checkbox"/> |                              | <input type="checkbox"/> |

**Frage 39: Wie sehr sind Sie mit der Behandlung und Betreuung im Gesamten zufrieden?** (1: sehr zufrieden – 5: überhaupt nicht zufrieden)

|                   |                          |                          |                          |                          |                          |                              |                          |
|-------------------|--------------------------|--------------------------|--------------------------|--------------------------|--------------------------|------------------------------|--------------------------|
| sehr<br>zufrieden | 1                        | 2                        | 3                        | 4                        | 5                        | überhaupt<br>nicht zufrieden | Keine<br>Angabe          |
|                   | <input type="checkbox"/> |                              | <input type="checkbox"/> |

**Frage 40: Wie schätzen Sie Ihre aktuelle Lebensqualität ein?**  
(1: sehr gut – 5: sehr schlecht)

|             |                          |                          |                          |                          |                          |                  |                          |
|-------------|--------------------------|--------------------------|--------------------------|--------------------------|--------------------------|------------------|--------------------------|
| sehr<br>gut | 1                        | 2                        | 3                        | 4                        | 5                        | sehr<br>schlecht | Keine<br>Angabe          |
|             | <input type="checkbox"/> |                  | <input type="checkbox"/> |

Vielen Dank für die Beantwortung des Fragebogens!

Bitte senden Sie den vollständig ausgefüllten Fragebogen mit dem beiliegenden Rückantwortkuvert anonym an:

*Appletree CI Group AG  
Rudolf-Diesel-Strasse 3  
8404 Winterthur*
