# Supplementary material for: From Diagnosis to Satisfaction in Multiple Sclerosis: A Swiss Patient Survey Highlighting the Importance of the First Diagnostic Consultation
Source: MDPI journal article supplement (doi:10.3390/ctn6010004), 2022-01-31
Supplement: s1 [file s1 › Tables_Supplementary material_11_2021.pdf]

**Supplementary Table S1.** Treatment decision (n = 212)

|                                                                        |                     |
|------------------------------------------------------------------------|---------------------|
| Influencing factors to induce a certain therapy, mean $\pm$ SD (range) |                     |
| (1=low priority, 5=very high priority)                                 |                     |
| Free of relapses (n=178)                                               | 4.8 $\pm$ 0.6 (1–5) |
| Delaying the grade of disability (n=182)                               | 4.7 $\pm$ 0.7 (1–5) |
| Efficacy (n=168)                                                       | 4.7 $\pm$ 0.8 (1–5) |
| Self-dependence (n=163)                                                | 4.6 $\pm$ 0.9 (1–5) |
| Long-term safety profile of the therapy (n=167)                        | 4.3 $\pm$ 1.0 (1–5) |
| Tolerance of the drugs (n=165)                                         | 4.1 $\pm$ 1.2 (1–5) |
| Partnership (n=155)                                                    | 4.1 $\pm$ 1.3 (1–5) |
| Job (n=154)                                                            | 4.0 $\pm$ 1.3 (1–5) |
| Others (n=23)                                                          | 3.7 $\pm$ 1.7 (1–5) |
| Documented long-term data of the drugs (n=145)                         | 3.6 $\pm$ 1.3 (1–5) |
| Frequency of drug-usage (n=157)                                        | 3.4 $\pm$ 1.5 (1–5) |
| Type of drug application (n=163)                                       | 3.4 $\pm$ 1.5 (1–5) |
| Family planning (n=147)                                                | 2.6 $\pm$ 1.7 (1–5) |
| Influence of Side effects on treatment decision, mean $\pm$ SD         |                     |
| (range) (1 = not at all; 5 = very high)                                |                     |
| Cardiac arrhythmia                                                     | 2.3 $\pm$ 1.6 (1–5) |
| Macular edema                                                          | 2.3 $\pm$ 1.6 (1–5) |
| Injection site reaction                                                | 2.9 $\pm$ 1.5 (1–5) |
| Thinning of the hair                                                   | 2.3 $\pm$ 1.6 (1–5) |
| Infections                                                             | 2.7 $\pm$ 1.6 (1–5) |
| Progressive multifocal Leukoencephalopathy (PML)                       | 2.8 $\pm$ 1.8 (1–5) |
| Nausea and vomiting                                                    | 2.6 $\pm$ 1.5 (1–5) |
| Skin rash and flush                                                    | 2.8 $\pm$ 1.5 (1–5) |
| Lymphopenia                                                            | 2.2 $\pm$ 1.5 (1–5) |
| Fatigue                                                                | 3.1 $\pm$ 1.5 (1–5) |
| Flu like symptoms                                                      | 3.1 $\pm$ 1.5 (1–5) |
| Risk for cancer                                                        | 2.7 $\pm$ 1.7 (1–5) |
| Constipation                                                           | 2.6 $\pm$ 1.5 (1–5) |
| Current data during pregnancy                                          | 2.0 $\pm$ 1.6 (1–5) |
| Safety feeling with regard to therapeutic decision (n= 196)            |                     |
| 1 (very safe)                                                          | 44 (22.4%)          |
| 2                                                                      | 40 (20.4%)          |
| 3                                                                      | 60 (30.6%)          |
| 4                                                                      | 35 (17.9%)          |
| 5 (very unsafe)                                                        | 17 (8.7%)           |

n, number; CIS, clinically isolated syndrome; RRMS, relapsing remitting multiple sclerosis; SPMS, secondary progressive multiple sclerosis

**Supplementary Table S2. Treatment satisfaction**

|                                                         |             |
|---------------------------------------------------------|-------------|
| Satisfaction with current therapy (n = 190)             |             |
| 1 (very satisfied)                                      | 111 (58.4%) |
| 2                                                       | 35 (18.4%)  |
| 3                                                       | 27 (14.2%)  |
| 4                                                       | 10 (5.3%)   |
| 5 (not at all satisfied)                                | 7 (3.7%)    |
| missing                                                 | 2 (1.1%)    |
| Satisfaction with current medical care (n = 201)        |             |
| 1 (very satisfied)                                      | 116 (57.7%) |
| 2                                                       | 48 (23.9%)  |
| 3                                                       | 17 (8.5%)   |
| 4                                                       | 14 (7.0%)   |
| 5 (not at all satisfied)                                | 6 (3.0%)    |
| Would you in retrospect choose the same initial therapy |             |
| Yes                                                     | 128 (60.4%) |
| No                                                      | 56 (26.4%)  |
| Missing                                                 | 28 (13.2%)  |
| Current quality of life (n = 206)                       |             |
| 1 (very good)                                           | 70 (34.0%)  |
| 2                                                       | 62 (30.1%)  |
| 3                                                       | 48 (23.3%)  |
| 4                                                       | 20 (9.7%)   |
| 5 (very bad)                                            | 6 (2.9%)    |

n, number; CIS, clinically isolated syndrome; RRMS, relapsing remitting multiple sclerosis; SPMS, secondary progressive multiple sclerosis
